# Supplementary material for: DNA methylation signature of cognitive reserve moderates CSF tau pathology in prodromal Alzheimer’s disease
Source: Research Square preprint supplement (doi:10.21203/rs.3.rs-8369919/v1), 2026-01-06
Supplement: Supplementary file 1 [file 023c1cb3470aeacaf49636ce.xlsx]

## Sheet: S1
	Supplementary Table 1 Quality control (QC) information on pre-processing of DNA methylation samples and probes.
	Quality Control Procedure	Number of probes or samples
	Probes QC
	(a) total number of probes before pre-processing	866836
	(b) remove probes on chrM or with missing annotation	865814
	(c) remove probes that don't start with “cg”	862882
	(d) remove probes on X and Y chromosomes	843341
	(e) remove crosshybridizing probes and those near SNPs	776649
	Samples QC
	(a) total number of samples	208
	(b) remove samples with bisulfite conversion rate < 85%	205
	(c) remove samples with predicted sex differ from recorded sex status	205
	(d) remove technical duplicates	181
	(g) remove samples > 3 standard deviations from mean of PC1 or PC2 before batch correction	176
	(h) remove samples > 3 standard deviations from mean of PC1 or PC2 after batch-correction	174
	(i) remove samples with missing diagnosis or APOE information	170
	(j) select samples from MCI subjects	92

## Sheet: S2
	Supplementary Table 2 Results of sensitivity analyses for models that additionally adjusted for smoking.
	(A) Significant individual CpGs
	CpG	Annotations				Primary Analysis				Analysis additionally adjust smoking scores
						Effect of DNAm x pTau interaction				Effect of DNAm x pTau interaction
		chr	pos	Illumina	GREAT_annotation	Estimate	StdErr	pValue	direction	Estimate	StdErr	pValue	direction
	cg01602139	chr6	36672171		CDKN1A (-6538);SRSF3 (+77805)	-0.0199471	0.00425739	2.79566e-06	-	-0.0201766	0.00429545	2.63745e-06	-
	cg03281038	chr15	54013008	UNC13C	UNC13C (+106)	0.0642454	0.013974	4.27572e-06	+	0.0648616	0.0140982	4.21045e-06	+
	cg08579041	chr5	126364531	GRAMD3	GRAMD3 (+4401);ALDH7A1 (+230886)	0.0716617	0.0147716	1.22642e-06	+	0.0721022	0.0148974	1.29894e-06	+
	cg11145222	chr11	44882533	TSPAN18	TP53I11 (+67626);TSPAN18 (+118110)	-0.0324513	0.00680147	1.83107e-06	-	-0.0325908	0.00685688	2.00406e-06	-
	cg24481207	chr14	54537562	CGRRF1	SAMD4A (-30354);CGRRF1 (+27736)	0.0445729	0.01004	9.0152e-06	+	0.0445701	0.0101373	1.09931e-05	+
	cg26869675	chr19	30000747	URI1	ZNF536 (-371664);URI1 (+58498)	0.0513345	0.0114383	7.19142e-06	+	0.0513569	0.0115387	8.55323e-06	+
	(B) Significant DMRs
		Annotations				Primary analysis				Analysis additionally adjust smoking
	DMR	chr	pos	Illumina	GREAT_annotation	nProbes	pValue	Sidak-P	direction	nProbes	pValue	Sidak-P	direction
	chr19:50983852-50984249	chr19	50983852-50984249	KLK7	KLK7 (-235)	12	7.92e-12	1.55e-08	------------	12	1.002e-11	1.961e-08	------------
	chr6:32095996-32096480	chr6	32095996-32096480	TNXB	TNXB (-50110);ATF6B (+32002)	17	2.682e-11	4.304e-08	+++++++++++++++++	16	3.657e-11	6.716e-08	++++++++++++++++
	chr5:110726641-110727135	chr5	110726641-110727135	TMEM232	TMEM232 (-223)	13	6.476e-11	1.018e-07	+++++++++++++	13	6.498e-12	1.022e-08	+++++++++++++
	chr4:183987356-183987864	chr4	183987356-183987864	STOX2	STOX2 (+82254);ENPP6 (+230351)	9	2.418e-10	3.697e-07	+++++++++	9	1.037e-10	1.585e-07	+++++++++
	chr6:7468547-7468818	chr6	7468547-7468818		CAGE1 (-78939);DSP (-72893)	5	4.129e-08	0.0001183	+++++	5	1.994e-08	5.717e-05	+++++
	chr13:75870661-75870928	chr13	75870661-75870928	LMO7DN	LMO7 (+234136)	7	5.384e-08	0.0001566	+++++++	7	7.382e-08	0.0002147	+++++++
	chr8:142778252-142778573	chr8	142778252-142778573	LYNX1	LYNX1-SLURP2 (-188)	8	3.642e-07	0.000881	--------	8	3.161e-07	0.0007645	--------
	chr10:132142481-132142678	chr10	132142481-132142678	JAKMIP3	DPYSL4 (-44321);JAKMIP3 (+37908)	3	1.672e-06	0.00657	+++	3	9.906e-07	0.003898	+++
	chr14:73246028-73246258	chr14	73246028-73246258	PAPLN	PAPLN (+8646);NUMB (+212387)	4	3.108e-06	0.01044	----	4	1.464e-06	0.004933	----
	chr5:14870484-14870639	chr5	14870484-14870639	ANKH	ANKH (+1217);OTULIN (+205813)	3	3.981e-06	0.01975	---	3	4.137e-06	0.02052	---
	chr11:18411952-18412200	chr11	18411952-18412200	LDHC	LDHC (-231)	7	4.209e-06	0.0131	+++++++	7	4.894e-06	0.01521	+++++++

## Sheet: S3
	Supplementary Table 3 Results of pathway analysis using methylGSA (PMID: 30346483). A total of 2 KEGG pathways and 20 Reactome pathways were enriched with memory reserve related DNA methylation at 25% FDR. Shown in red text are pathways related to metabolic health.
	ID	Description	Size	pValue	FDR	core_enrichment	core_enrichment_count
	KEGG pathways
	4920	Adipocytokine signaling pathway	64	0.000262025	0.0568595	ADIPOR2/PPARGC1A/AKT3/PRKCQ/PRKAA1/MAPK9/IKBKB/NPY/MAPK8/IRS1/CHUK/MAPK10	12
	03013	Nucleocytoplasmic transport	134	0.00166594	0.180754	NUP98/RPP30/EEF1A1/NDC1/MAGOH/ACIN1/EIF4G2/EIF3F/MAGOHB/GEMIN6/SEH1L/RPP38/EEF1A2/SUMO2/NUP107/NUP43/ALYREF/NUP210L/EIF3H/NUP155/NCBP2/SRRM1/EIF2B3/NMD3/NUP85/EIF3A/TGS1/NUP205/TRNT1/POP4/EIF1/EIF5/THOC5/PHAX/CLNS1A/SUMO4/NXT1/POP1/EIF3G/NUP153/NUP133/RAE1/THOC1/RANBP2/POP7/THOC6/XPO1/SAP18	48
	Reactome pathways
	R-HSA-3899300	SUMOylation of transcription cofactors	44	0.00013717	0.108018	DDX17/NCOA1/SCMH1/TRIM28/PPARGC1A/NCOA2/SUMO2/UHRF2/PHC3	9
	R-HSA-1433557	Signaling by SCF-KIT	41	0.000307594	0.108018	NRAS/FER/STAT1/PIK3CA	4
	R-HSA-1650814	Collagen biosynthesis and modifying enzymes	65	0.00045797	0.111401	COL10A1/COL28A1/COLGALT1/COL21A1/PCOLCE2/COL6A6/COL7A1/PLOD3/SERPINH1/ADAMTS3/COL9A1	11
	R-HSA-400206	Regulation of lipid metabolism by PPARalpha	115	0.000554114	0.119812	NFYA/CLOCK/MED21/NCOA1/PPARGC1A/HMGCS1/CYP1A1/UGT1A9/MED19/ME1/NCOA2/SP1/MED6/MED17/ACADM/HMGCS2/THRAP3/MED22/FADS1/MED7/ABCB4/HELZ2/MED28/TGS1/AGT/MED29/SULT2A1/TBL1XR1/MTF1/CYP4A11/MED4	31
	R-HSA-163560	Triglyceride catabolism	23	0.000737289	0.130354	ABHD5/FABP4/FABP5	3
	R-HSA-9843745	Adipogenesis	105	0.000847194	0.130354	MED21/NCOA1/PPARGC1A/MED19/COX7A1/NCOA2/MED6/MED17/WNT1/THRAP3/MED22/DIO2/MED7/FABP4/KLF5/HELZ2/MED28/TGS1/EGR2/MED29/TBL1XR1/MED4/SMAD4/UCP1/LPL	25
	R-HSA-5358508	Mismatch Repair	15	0.00113211	0.130354	MSH2/PCNA/MSH3/MLH1	4
	R-HSA-5358606	Mismatch repair (MMR) directed by MSH2:MSH3 (MutSbeta)	14	0.00120574	0.130354	MSH2/PCNA/MSH3/MLH1	4
	R-HSA-5358565	Mismatch repair (MMR) directed by MSH2:MSH6 (MutSalpha)	14	0.00120574	0.130354	MSH2/PCNA/MLH1	3
	R-HSA-9734767	Developmental Cell Lineages	119	0.00201642	0.174303	KLK7/PNLIPRP2/KRT10/FN1/NUMB/FGF2/LGALS7/IVL/CPB1/KLK1/CLDN10/CER1/CA2/FABP5/TFRC/LAMA4/CASP14/KLK5/ANXA1/SBSN/HOPX/KRT24/TP63/PTF1A/CXCR4/PROM1/ONECUT1/ITGB1	28
	R-HSA-156580	Phase II - Conjugation of compounds	106	0.0022754	0.174303	MAT1A/GSTM3/UGT1A1/UGT1A9/GSTT1/SLC35B3/GSTO1/UGT2B4/CHAC2/UGP2/UGT2B7/SULT1B1/GGT5/PAPSS2/GSTA5/OPLAH/SLC35D1/MAT2B/SULT2A1/UGT2B17/MTR/UGT2A2/GLYATL3/GSTA4/UGT2B28/GSTM4/UGT2B10/GSTM1/UGT1A7/UGT1A3/SLC35B2/SULT1C2	32
	R-HSA-1474290	Collagen formation	88	0.00246039	0.174303	COL10A1/COL28A1/COLGALT1/LOXL3/LOX/COL21A1/PCOLCE2/COL6A6/COL7A1/PLOD3/SERPINH1/ADAMTS3/COL9A1/MMP7	14
	R-HSA-5362517	Signaling by Retinoic Acid	39	0.00253438	0.174303	RDH11/AKR1C3/DLAT/DLD/PDK4/RDH16/FABP5/ADH4/PDK2	9
	R-HSA-381340	Transcriptional regulation of white adipocyte differentiation	81	0.00271937	0.174303	MED21/NCOA1/PPARGC1A/MED19/NCOA2/MED6/MED17/WNT1/THRAP3/MED22/MED7/FABP4/KLF5/HELZ2/MED28/TGS1/EGR2/MED29/TBL1XR1/MED4/LPL	21
	R-HSA-71240	Tryptophan catabolism	12	0.00294136	0.174303	IDO1/SLC3A2/KYNU/ACMSD	4
	R-HSA-9734009	Defective Intrinsic Pathway for Apoptosis	25	0.00305235	0.174303	CAST/TP53/CAPNS2/SOD2	4
	R-HSA-1483191	Synthesis of PC	27	0.00312634	0.174303	PCTP/CEPT1/STARD10/CSNK2B	4
	R-HSA-2142753	Arachidonate metabolism	56	0.00390403	0.211034	CYP2J2/PON2/AKR1C3/CYP1A1/PLA2G4A/CYP8B1/CYP4A22/PTGES3/GGT5/CYP2U1/GPX1/HPGD/CYP4A11/CYP4F2/CYP1B1/ALOX15	16
	R-HSA-9851695	Epigenetic regulation of adipogenesis genes by MLL3 and MLL4 complexes	70	0.00501943	0.232567	RBBP5/NCOA1/PPARGC1A/KMT2C/NCOA2/MED6/MED17/MED7/FABP4/PDK4/PAGR1/SIRT1/KMT2D/TBL1XR1/MED4/PAXIP1/LPL/NCOA4	18
	R-HSA-166663	Initial triggering of complement	22	0.0054656	0.241728	COLEC11/CFB/COLEC10	3

## Sheet: S4
	Supplementary Table 4 A total of 9 memory reserve-related CpGs were significantly associated with gene expression levels of nearby gene in cis. The eQTm results (i.e., DNAm to RNA associations) were obtained from Yao et al. (2021) (PMID: 33752734). In GREAT annotation, the numbers in parentheses indicate the distance from the TSS.
		Annotations for CpGs				eQTm results from Yao et al. (PMID: 33752734)
						Target gene and transcript				CpG-to-Transcript association
	CpGs located in DMRs
	CpG	chr	position	GREAT_annotation	Relation_to_Island	GeneSymbol	transcript-chr	transcript-start	transcript-end	T value	log10P
	cg14843632	chr5	14870484	ANKH (+1293);FAM105B (+205738)	N_Shore	ANKH|LOC100130744	chr5	14704811	14871767	14.95	-48.36
	cg27316798	chr5	14870556	ANKH (+1221);FAM105B (+205810)	N_Shore	ANKH|LOC100130744	chr5	14704811	14871767	11.95	-31.58
	cg02107279	chr5	14870639	ANKH (+1138);FAM105B (+205893)	N_Shore	ANKH|LOC100130744	chr5	14704811	14871767	12.57	-34.76
	cg07093428	chr11	18411952	LDHC (-354)		LDHC	chr11	18412306	18452037	-24.46	-121.82
	cg19767548	chr11	18412006	LDHC (-300)		LDHC	chr11	18412306	18452037	-23.93	-117
	cg14332815	chr11	18412016	LDHC (-290)		LDHC	chr11	18412306	18452037	-25.57	-132.18
	cg11821245	chr11	18412135	LDHC (-171)		LDHC	chr11	18412306	18452037	-24.61	-123.23
	cg14259717	chr11	18412184	LDHC (-122)		LDHC	chr11	18412306	18452037	-21.5	-95.96
	cg08418111	chr11	18412197	LDHC (-109)		LDHC	chr11	18412306	18452037	-22.14	-101.32

## Sheet: S5
	Supplementary 5 A total of 97791 mQTL - CpG pairs were significant in MCI samples analyses. The blood mQTLs were obtained from the GoDMC database. We searched for mQTLs for CpGs mapped to the 6 memory reserve-related CpGs and 88 CpGs located in memory reserve-related DMRs identified from MCI samples analysis. Definitions for columns under "Blood mQTLs" can be obtained from README file at http://m…
	CpG-SNP	Annotations for CpGs							Annotations for SNPs			Blood mQTLs
		CpG	UCSC_RefGene_Group	UCSC_RefGene_Accession	UCSC_RefGene_Name	Relation_to_Island	chr	position	SNP	SNPid	cpg_SNP_distance	beta_a1	se	pval	samplesize	allele1	allele2	freq_a1	freq_se	cistrans	num_studies	direction	hetisq	hetchisq	hetpval	tausq	beta_are_a1	se_are	pval_are	se_mre	pval_mre	chunk	clumped	sig
	cg26266427-chr6:32593317:SNP	cg26266427	Body	NM_019105	TNXB	Island	chr6	32063838	chr6:32593317:SNP	rs9271704	529479	-0.167464	0.0134573	0	12478	G	T	0.3189	0.0276	TRUE	18	+++?+?+???+?++?+++++????????+???++++	49.7	33.8283	0.008835	0.0032941	-0.164952	0.0200201	1.732e-16	0.0267787	4.01e-10	913	FALSE	1
	cg26266427-chr6:32092090:SNP	cg26266427	Body	NM_019105	TNXB	Island	chr6	32063838	chr6:32092090:SNP	rs62402722	28252	0.305062	0.0297825	1.272e-24	18440	C	A	0.0344	0.0087	TRUE	24	---?--?---??--?-----?---?????-?----+	0	15.9635	0.8568	0	0.305062	0.0297825	1.272e-24	0.0297825	1.272e-24	913	FALSE	1
	cg26266427-chr6:32584936:INDEL	cg26266427	Body	NM_019105	TNXB	Island	chr6	32063838	chr6:32584936:INDEL	chr6:32584936:INDEL	521098	0.154528	0.0142789	0	11088	I	D	0.3416	0.0453	TRUE	15	?--??--??????-??----??--?????-???-+-	0	13.6079	0.4793	0	0.154528	0.0142789	2.706e-27	0.0142789	2.706e-27	913	FALSE	1
	cg26266427-chr6:30330071:SNP	cg26266427	Body	NM_019105	TNXB	Island	chr6	32063838	chr6:30330071:SNP	rs3094056		-0.203016	0.0161868	4.393e-36	17575	A	G	0.1262	0.0204	FALSE	25	---?----?--?--?-----?-?+????--?---+-	31.1	34.8496	0.07066	0.003017	-0.193547	0.0205377	4.343e-21	0.0235044	5.751e-18	913	FALSE	1
	cg26266427-chr6:32587067:SNP	cg26266427	Body	NM_019105	TNXB	Island	chr6	32063838	chr6:32587067:SNP	rs9271375	523229	-0.142464	0.0115746	8.174e-35	14825	A	G	0.479	0.0164	TRUE	21	---?----?-??--?-----????????-??-----	38.5	32.5102	0.03816	0.0017911	-0.142407	0.015439	2.867e-20	0.0188146	3.676e-14	913	FALSE	1
	cg26266427-chr6:31308409:SNP	cg26266427	Body	NM_019105	TNXB	Island	chr6	32063838	chr6:31308409:SNP	rs28753066	755429	-0.140554	0.0109421	9.143e-38	16545	G	A	0.505	0.039	TRUE	21	+++??++???+?++?+++++??++????++??++++	20.6	25.1922	0.1942	0.0006711	-0.1415	0.0128085	2.258e-28	0.0137828	2.028e-24	913	FALSE	1
	cg26266427-chr6:32591971:SNP	cg26266427	Body	NM_019105	TNXB	Island	chr6	32063838	chr6:32591971:SNP	rs9271628	528133	0.140564	0.0112096	4.532e-36	18580	G	T	0.3249	0.0415	TRUE	23	---?----?--?--?-----??--????-???--+-	22	28.2158	0.1686	0.0008348	0.138708	0.0132327	1.043e-25	0.0143767	1.411e-22	913	FALSE	1
	cg26266427-chr6:32598581:SNP	cg26266427	Body	NM_019105	TNXB	Island	chr6	32063838	chr6:32598581:SNP	rs9272025	534743	0.131999	0.0131031	0	13081	A	C	0.3405	0.0361	TRUE	19	+++?++++?+??++?+++?+???+????+???+?-+	32.7	26.7613	0.08358	0.0016262	0.132514	0.0167926	2.993e-15	0.0194809	1.237e-11	913	FALSE	1
	cg26266427-chr6:31301521:SNP	cg26266427	Body	NM_019105	TNXB	Island	chr6	32063838	chr6:31301521:SNP	rs74356781	762317	-0.109462	0.0131255	7.45e-17	12265	A	G	0.3911	0.0372	TRUE	16	?--??--???-??-??----??--?????-???-+-	51.9	31.2151	0.008221	0.0031256	-0.120366	0.0205678	4.853e-09	0.0273142	6.136e-05	913	FALSE	1
	cg26266427-chr6:31311213:SNP	cg26266427	Body	NM_019105	TNXB	Island	chr6	32063838	chr6:31311213:SNP	rs9265824	752625	-0.122456	0.0119837	0	14815	T	A	0.3806	0.0494	TRUE	19	+++?-+????+?++?+++????++????++??++++	25.1	24.0252	0.1542	0.0009473	-0.119264	0.0146452	3.838e-16	0.015995	1.92e-14	913	FALSE	1
	cg26266427-chr6:32194630:SNP	cg26266427	Body	NM_019105	TNXB	Island	chr6	32063838	chr6:32194630:SNP	rs3096690	130792	-0.40759	0.0148777	3.06e-165	19878	C	G	0.1261	0.0178	TRUE	25	---??---?--?--?-----?---????--?-----	43.5	42.4592	0.01146	0.0043513	-0.410605	0.0210667	1.316e-84	0.0263207	4.346e-54	913	FALSE	1
	cg26266427-chr6:32565648:SNP	cg26266427	Body	NM_019105	TNXB	Island	chr6	32063838	chr6:32565648:SNP	rs9270636	501810	-0.217972	0.0164664	5.34e-40	8834	C	A	0.2908	0.0253	TRUE	14	+++?+?+?????++?+++??????????+???+?++	62	34.2244	0.001113	0.0064203	-0.21596	0.028592	4.248e-14	0.0433503	4.952e-07	913	FALSE	1
	cg26266427-chr6:32429825:SNP	cg26266427	Body	NM_019105	TNXB	Island	chr6	32063838	chr6:32429825:SNP	rs9268860	365987	0.153096	0.0104973	3.535e-48	20894	T	C	0.3314	0.0426	TRUE	27	+++?++++?++?++?+++++?++++???++?+++-+	21.4	33.0907	0.1595	0.0008263	0.152338	0.0123053	3.36e-35	0.0133602	2.116e-30	913	FALSE	1
	cg26266427-chr6:32578369:SNP	cg26266427	Body	NM_019105	TNXB	Island	chr6	32063838	chr6:32578369:SNP	rs9271190	514531	-0.223594	0.0111404	1.34e-89	19347	A	C	0.2858	0.0314	TRUE	24	---?----?--?--?-----??--????-??-----	42.7	40.1575	0.01476	0.0022733	-0.225634	0.0156002	2.058e-47	0.0194509	1.394e-30	913	FALSE	1
	cg26266427-chr6:31440082:SNP	cg26266427	Body	NM_019105	TNXB	Island	chr6	32063838	chr6:31440082:SNP	rs1055569	623756	0.110892	0.0107114	4.065e-25	20419	T	C	0.3084	0.0391	TRUE	26	+++?++++?++?++?+++++?-+++????+?+++++	0	24.3647	0.4984	0	0.110892	0.0107114	4.065e-25	0.0107114	4.065e-25	913	FALSE	1
	cg26266427-chr6:32754593:SNP	cg26266427	Body	NM_019105	TNXB	Island	chr6	32063838	chr6:32754593:SNP	rs28986399	690755	0.225768	0.0185995	6.612e-34	21456	G	T	0.0769	0.0143	TRUE	28	---?-------?--?-+---?----???--?---+-	29.4	38.2581	0.07387	0.00412	0.21174	0.0232286	7.831e-20	0.0263549	1.067e-17	913	FALSE	1
	cg26266427-chr6:32609015:SNP	cg26266427	Body	NM_019105	TNXB	Island	chr6	32063838	chr6:32609015:SNP	rs9272686	545177	-0.240924	0.0149103	9.93e-59	11740	T	C	0.248	0.0192	TRUE	14	-???-?-??-??--?---????-?????-???-?--	46.1	24.1213	0.03003	0.0028278	-0.239219	0.0223971	1.252e-26	0.0276658	3.083e-18	913	FALSE	1
	cg26266427-chr6:32272711:SNP	cg26266427	Body	NM_019105	TNXB	Island	chr6	32063838	chr6:32272711:SNP	rs9268170	208873	-0.201433	0.0123896	1.953e-59	18141	G	A	0.2358	0.0232	TRUE	26	+++?++++?++?++?-++++?+?++???++?+++++	8.8	27.3991	0.3362	0.0003884	-0.201437	0.0131584	6.695e-53	0.0135785	8.746e-50	913	FALSE	1
	cg26266427-chr6:31457937:INDEL	cg26266427	Body	NM_019105	TNXB	Island	chr6	32063838	chr6:31457937:INDEL	chr6:31457937:INDEL	605901	-0.145875	0.0118161	5.155e-35	16556	D	I	0.3172	0.0275	TRUE	21	---??--???-?--?-----??--????--??----	38.9	32.7325	0.03609	0.0019259	-0.150669	0.016155	1.095e-20	0.0193385	4.585e-14	913	FALSE	1
	cg26266427-chr6:32602568:SNP	cg26266427	Body	NM_019105	TNXB	Island	chr6	32063838	chr6:32602568:SNP	rs9272229	538730	0.115724	0.0119772	0	14203	C	T	0.4855	0.0477	TRUE	20	---?----?--?--?+----????????-???+?--	41.2	32.2877	0.029	0.0020474	0.112899	0.0164356	6.456e-12	0.0203535	1.303e-08	913	FALSE	1
	cg26266427-chr6:32584419:INDEL	cg26266427	Body	NM_019105	TNXB	Island	chr6	32063838	chr6:32584419:INDEL	chr6:32584419:INDEL	520581	0.155705	0.0120334	2.696e-38	16465	D	I	0.3125	0.0476	TRUE	22	+++?+++?+???++?++++++?++????+???++-+	13.2	24.2002	0.2835	0.0004985	0.154169	0.0133285	6.067e-31	0.0138672	2.959e-29	913	FALSE	1
	cg26266427-chr6:32186264:SNP	cg26266427	Body	NM_019105	TNXB	Island	chr6	32063838	chr6:32186264:SNP	rs436388	122426	0.107686	0.0108947	4.873e-23	17661	T	C	0.3913	0.0315	TRUE	25	+++?+-++?++?++?-++++?+?++????+?+++++	46.6	44.9526	0.005901	0.0026278	0.105352	0.0156296	1.578e-11	0.020406	1.312e-07	913	FALSE	1
	cg26266427-chr6:31241092:SNP	cg26266427	Body	NM_019105	TNXB	Island	chr6	32063838	chr6:31241092:SNP	rs2523599	822746	-0.149846	0.0102577	2.494e-48	20102	C	G	0.3771	0.0243	TRUE	26	---?----+--?--?-----?---????--?-?---	18	30.4953	0.2063	0.0006153	-0.149081	0.0117789	1.029e-36	0.0125125	4.765e-33	913	FALSE	1
	cg26266427-chr6:32750348:SNP	cg26266427	Body	NM_019105	TNXB	Island	chr6	32063838	chr6:32750348:SNP	rs28893550	686510	0.228907	0.0189196	1.07e-33	20734	A	T	0.0771	0.0145	TRUE	27	+++?+++++++?++?+-+++?++++???++??++-+	30.6	37.4376	0.06823	0.0043431	0.214306	0.0238861	2.912e-19	0.0272425	4.368e-17	913	FALSE	1
	cg26266427-chr6:32239314:SNP	cg26266427	Body	NM_019105	TNXB	Island	chr6	32063838	chr6:32239314:SNP	rs3096678	175476	-0.203982	0.0124712	3.927e-60	18139	A	G	0.2304	0.0218	TRUE	26	---?----?--?--?+----?-?--???--?-----	14.9	29.3769	0.2485	0.0007179	-0.20397	0.0138294	3.121e-49	0.0146546	4.835e-44	913	FALSE	1
	cg26266427-chr6:32663606:SNP	cg26266427	Body	NM_019105	TNXB	Island	chr6	32063838	chr6:32663606:SNP	rs2856668	599768	-0.128463	0.0107742	8.956e-33	17626	G	C	0.4042	0.0262	TRUE	25	+++??+++?+-?+-?+++++?+?++???++?+++++	48.1	46.2385	0.004144	0.002724	-0.130262	0.0156114	7.179e-17	0.0207576	6.065e-10	913	FALSE	1
	cg26266427-chr6:32961361:SNP	cg26266427	Body	NM_019105	TNXB	Island	chr6	32063838	chr6:32961361:SNP	rs9500927	897523	-0.138491	0.0137081	0	20415	A	G	0.1586	0.0169	TRUE	26	---?----?--?--?---+-?----????-?-----	0	23.0071	0.5771	0	-0.138491	0.0137081	5.367e-24	0.0137081	5.367e-24	913	FALSE	1
	cg26266427-chr6:31239108:SNP	cg26266427	Body	NM_019105	TNXB	Island	chr6	32063838	chr6:31239108:SNP	rs1131118	824730	0.151814	0.0153543	0	12259	A	T	0.2264	0.0201	TRUE	16	?++??++???+??+??++++??++?????+???+-+	30	21.4258	0.1238	0.0016767	0.151426	0.0194135	6.189e-15	0.0219318	4.45e-12	913	FALSE	1
	cg26266427-chr6:32751962:SNP	cg26266427	Body	NM_019105	TNXB	Island	chr6	32063838	chr6:32751962:SNP	rs9276689	688124	-0.367973	0.0155543	9.94e-124	20482	T	C	0.1123	0.0174	TRUE	26	---?-------?--?-----?---?????-?-----	10	27.7896	0.3176	0.0007185	-0.369181	0.0168289	1.14e-106	0.01729	1.65e-100	913	FALSE	1
	cg26266427-chr6:32449198:SNP	cg26266427	Body	NM_019105	TNXB	Island	chr6	32063838	chr6:32449198:SNP	rs9394101	385360	0.126126	0.0117897	1.04e-26	14309	G	A	0.4749	0.0404	TRUE	21	---?---???-?--?--+--???-????-??---+-	44.5	36.0644	0.01512	0.0023845	0.127049	0.0165913	1.895e-14	0.0212593	2.979e-09	913	FALSE	1
	cg26266427-chr6:32585055:SNP	cg26266427	Body	NM_019105	TNXB	Island	chr6	32063838	chr6:32585055:SNP	rs686250	521217	-0.201963	0.0130581	0	11943	A	G	0.4098	0.0264	TRUE	18	---?---?????--?-----???-????????----	36.4	26.7351	0.06207	0.001797	-0.204071	0.0171666	1.372e-32	0.0205358	7.981e-23	913	FALSE	1
	cg26266427-chr6:32596661:INDEL	cg26266427	Body	NM_019105	TNXB	Island	chr6	32063838	chr6:32596661:INDEL	chr6:32596661:INDEL	532823	-0.118004	0.0136819	6.416e-18	10925	D	I	0.484	0.0401	TRUE	16	---?-?-???-?--?+--?-????????-???-?--	21.5	19.1071	0.2089	0.0008432	-0.116399	0.0160385	3.944e-13	0.0174281	1.28e-11	913	FALSE	1
	cg26266427-chr6:32583477:SNP	cg26266427	Body	NM_019105	TNXB	Island	chr6	32063838	chr6:32583477:SNP	rs28383223	519639	-0.198427	0.0120035	2.204e-61	13873	C	T	0.4349	0.0333	TRUE	20	+++?+++??+??++?+++++???+????+???++++	15.1	22.3819	0.2657	0.0005233	-0.198354	0.0133629	7.654e-50	0.0141401	9.802e-45	913	FALSE	1
	cg26266427-chr6:32443210:SNP	cg26266427	Body	NM_019105	TNXB	Island	chr6	32063838	chr6:32443210:SNP	rs9269107	379372	-0.176189	0.0134705	4.306e-39	14331	A	G	0.266	0.037	TRUE	21	---?---???-?--?-----???-????-??-----	31.4	29.1629	0.0846	0.0017751	-0.174081	0.0168997	6.985e-25	0.019642	2.964e-19	913	FALSE	1
	cg26266427-chr6:32564898:SNP	cg26266427	Body	NM_019105	TNXB	Island	chr6	32063838	chr6:32564898:SNP	rs28366346	501060	0.171071	0.0182848	0	6539	G	A	0.3645	0.0398	TRUE	10	-???-???????--?-?-??????????-???-?+-	34.4	13.7158	0.1328	0.0018838	0.16599	0.0244338	1.095e-11	0.0278656	8.297e-10	913	FALSE	1
	cg26266427-chr6:31305153:SNP	cg26266427	Body	NM_019105	TNXB	Island	chr6	32063838	chr6:31305153:SNP	rs28367815	758685	-0.145823	0.0099572	1.451e-48	20013	G	A	0.5017	0.0377	TRUE	25	+++?++++?++?++?+++++??++????++?+++++	9.9	26.6445	0.3213	0.0002788	-0.146386	0.010718	1.808e-42	0.0110543	9.827e-40	913	FALSE	1
	cg26266427-chr6:32746518:SNP	cg26266427	Body	NM_019105	TNXB	Island	chr6	32063838	chr6:32746518:SNP	rs9501209	682680	0.113134	0.0110385	1.195e-24	18122	A	G	0.3453	0.0405	TRUE	24	+++?+++?-?-?++?+++++??+++???++??++++	30.4	33.0416	0.08035	0.001309	0.113705	0.0139415	3.467e-16	0.0158578	9.728e-13	913	FALSE	1
	cg26266427-chr6:32582640:SNP	cg26266427	Body	NM_019105	TNXB	Island	chr6	32063838	chr6:32582640:SNP	rs9271330	518802	-0.224861	0.0116753	1.172e-82	17419	A	G	0.2893	0.0307	TRUE	22	---?----?-??--?-----??--????-???----	40.6	35.3239	0.02601	0.0021026	-0.226374	0.0161251	9.051e-45	0.0196388	2.356e-30	913	FALSE	1
	cg26266427-chr6:32444096:SNP	cg26266427	Body	NM_019105	TNXB	Island	chr6	32063838	chr6:32444096:SNP	rs28732244	380258	0.1363	0.0121825	4.659e-29	13606	T	C	0.4479	0.0401	TRUE	20	+++?+++???+?++?+++++???+????+???++++	21.5	24.2003	0.1886	0.0008285	0.136604	0.0142092	6.997e-22	0.0155169	1.578e-18	913	FALSE	1
	cg26266427-chr6:32745435:SNP	cg26266427	Body	NM_019105	TNXB	Island	chr6	32063838	chr6:32745435:SNP	rs12661326	681597	0.216341	0.0189224	2.857e-30	20662	T	C	0.077	0.0134	TRUE	27	+++?+++?-++?++?+-+++?++++???++?+++-+	36.5	40.9496	0.0314	0.0056753	0.200562	0.0250538	1.192e-15	0.0298024	3.894e-13	913	FALSE	1
	cg26266427-chr6:32609147:SNP	cg26266427	Body	NM_019105	TNXB	Island	chr6	32063838	chr6:32609147:SNP	rs12722051	545309	0.249454	0.0200673	1.777e-35	7422	T	A	0.2094	0.0265	TRUE	11	-???-?-?????--?-?-??????????-???-?+-	55.5	22.4548	0.01295	0.0058059	0.246532	0.0324328	2.931e-14	0.0450609	3.096e-08	913	FALSE	1
	cg26266427-chr6:32763888:SNP	cg26266427	Body	NM_019105	TNXB	Island	chr6	32063838	chr6:32763888:SNP	rs9276726	700050	-0.166556	0.0102619	3.068e-59	20975	C	T	0.3275	0.0263	TRUE	27	+++?+++++++?++?+++++?++++????+?+++++	32.6	38.5614	0.05366	0.0014006	-0.167028	0.013129	4.459e-37	0.0152197	7.144e-28	913	FALSE	1
	cg26266427-chr6:32585901:SNP	cg26266427	Body	NM_019105	TNXB	Island	chr6	32063838	chr6:32585901:SNP	rs28383264	522063	0.254311	0.0178646	5.517e-46	13297	T	C	0.145	0.0293	TRUE	19	?++?+++?????++?+++++??++????+??+?+++	19.9	22.4795	0.2114	0.001555	0.251762	0.0208226	1.181e-33	0.0223104	4.24e-30	913	FALSE	1
	cg26266427-chr6:32337854:INDEL	cg26266427	Body	NM_019105	TNXB	Island	chr6	32063838	chr6:32337854:INDEL	chr6:32337854:INDEL	274016	0.125222	0.0138003	1.148e-19	14674	D	I	0.2374	0.0326	TRUE	22	+++?+++???+?++?+++++?+?+????-+??+++-	28.3	29.2725	0.1076	0.0016784	0.120491	0.0169127	1.046e-12	0.0192366	7.535e-11	913	FALSE	1
	cg26266427-chr6:32447216:SNP	cg26266427	Body	NM_019105	TNXB	Island	chr6	32063838	chr6:32447216:SNP	rs29001620	383378	0.139328	0.0118332	5.297e-32	14367	T	A	0.4533	0.0346	TRUE	21	---?----??-?--?-----???-????-???----	19.2	24.7567	0.2109	0.0007117	0.139803	0.0135452	5.65e-25	0.0146476	1.87e-21	913	FALSE	1
	cg26266427-chr6:32188713:SNP	cg26266427	Body	NM_019105	TNXB	Island	chr6	32063838	chr6:32188713:SNP	rs8192587	124875	0.384984	0.0323689	1.277e-32	17643	G	C	0.0292	0.0066	TRUE	25	---?----?--?--?-+---?-?-????--?-----	0	23.39	0.4969	0	0.384984	0.0323689	1.277e-32	0.0323689	1.277e-32	913	FALSE	1
	cg26266427-chr6:32568769:SNP	cg26266427	Body	NM_019105	TNXB	Island	chr6	32063838	chr6:32568769:SNP	rs28752500	504931	0.190778	0.0127743	1.963e-50	13643	T	G	0.3583	0.0421	TRUE	18	+++?+?+?????++?++++++?+?????+???+?-+	45.3	31.0682	0.01959	0.0025275	0.183538	0.0186591	7.846e-23	0.0233455	3.034e-16	913	FALSE	1
	cg26266427-chr6:32746482:SNP	cg26266427	Body	NM_019105	TNXB	Island	chr6	32063838	chr6:32746482:SNP	rs9501207	682644	0.115041	0.0110373	1.948e-25	17984	T	C	0.349	0.0372	TRUE	24	+++?+++?-?-?++?+++++?+++????++??++++	34	34.8435	0.05391	0.001544	0.116568	0.0143661	4.894e-16	0.0167207	5.98e-12	913	FALSE	1
	cg26266427-chr6:30829522:SNP	cg26266427	Body	NM_019105	TNXB	Island	chr6	32063838	chr6:30829522:SNP	rs2844657		-0.150309	0.0129752	4.947e-31	17563	G	A	0.2089	0.0259	FALSE	25	+++?++++?++?++?+++++?+?-+????+?+++++	14.9	28.2133	0.2511	0.0007506	-0.146631	0.0144212	2.761e-24	0.015253	6.561e-23	913	FALSE	1
	cg26266427-chr6:32225050:SNP	cg26266427	Body	NM_019105	TNXB	Island	chr6	32063838	chr6:32225050:SNP	rs9268016	161212	-0.191329	0.0122477	5.187e-55	18136	C	T	0.2429	0.0229	TRUE	26	+++?++++?++?++?-++++?+?++???++?+++++	20.2	31.3087	0.179	0.000998	-0.191327	0.0141074	6.719e-42	0.0153384	1.037e-35	913	FALSE	1
	cg26266427-chr6:32248176:SNP	cg26266427	Body	NM_019105	TNXB	Island	chr6	32063838	chr6:32248176:SNP	rs6457530	184338	-0.196871	0.0131671	1.519e-50	16148	T	C	0.2322	0.0222	TRUE	24	---?----??-?--?+----?-?-????--?-----	0	23.0007	0.4607	1e-07	-0.196871	0.0131674	1.526e-50	0.0131676	1.53e-50	913	FALSE	1
	cg26266427-chr6:31306550:SNP	cg26266427	Body	NM_019105	TNXB	Island	chr6	32063838	chr6:31306550:SNP	rs28752985	757288	0.143003	0.0134202	0	10959	C	T	0.4865	0.0377	TRUE	14	?--??-????-??-??--?-??--?????-???---	0	11.0414	0.6073	0	0.143003	0.0134202	1.639e-26	0.0134202	1.639e-26	913	FALSE	1
	cg26266427-chr6:31431813:SNP	cg26266427	Body	NM_019105	TNXB	Island	chr6	32063838	chr6:31431813:SNP	rs3130907	632025	-0.345695	0.0147997	0	19920	G	A	0.1345	0.0228	TRUE	25	+++?++++?++?++?+++++?+++?????+?+++++	21	30.3983	0.1719	0.0015004	-0.347941	0.0175186	8.806e-88	0.0187453	6.081e-76	913	FALSE	1
	cg26266427-chr6:32593392:SNP	cg26266427	Body	NM_019105	TNXB	Island	chr6	32063838	chr6:32593392:SNP	rs9271709	529554	-0.158709	0.0129464	1.505e-34	13513	A	G	0.3232	0.0281	TRUE	19	---?-?-??--?--?-----????????-??--?--	45.9	33.2447	0.01559	0.0027491	-0.157357	0.0184929	1.753e-17	0.023911	3.191e-11	913	FALSE	1
	cg26266427-chr6:32588700:SNP	cg26266427	Body	NM_019105	TNXB	Island	chr6	32063838	chr6:32588700:SNP	rs9271472	524862	0.141297	0.0115778	2.955e-34	17421	T	C	0.3263	0.0387	TRUE	22	+++?++++?+??++?+++++??++????+???++-+	12.1	23.9042	0.2977	0.0004182	0.140014	0.012705	3.048e-28	0.0131789	8.075e-27	913	FALSE	1
	cg26266427-chr6:32443368:SNP	cg26266427	Body	NM_019105	TNXB	Island	chr6	32063838	chr6:32443368:SNP	rs9269112	379530	-0.176384	0.0131511	5.138e-41	15041	G	C	0.2678	0.0364	TRUE	21	+++?+++??++?++?+++++???+????+???++++	23.5	26.1509	0.1609	0.0011361	-0.174184	0.0155355	3.562e-29	0.0171957	1.096e-24	913	FALSE	1
	cg26266427-chr6:32775235:SNP	cg26266427	Body	NM_019105	TNXB	Island	chr6	32063838	chr6:32775235:SNP	rs1480381	711397	0.117957	0.0098099	2.65e-33	24130	T	A	0.307	0.0358	TRUE	30	----?---+--?--------?---+???--------	28.8	40.7264	0.07274	0.0011871	0.116392	0.0121651	1.093e-21	0.0137766	1.108e-17	913	FALSE	1
	cg26266427-chr6:30951561:SNP	cg26266427	Body	NM_019105	TNXB	Island	chr6	32063838	chr6:30951561:SNP	rs1634714		-0.181341	0.0146209	2.522e-35	16234	C	T	0.1758	0.0287	FALSE	23	+++?++?+?++?++?+++++?+?+?????+?+++++	26.3	29.8599	0.1219	0.0017924	-0.173911	0.017819	1.674e-22	0.0198445	6.356e-20	913	FALSE	1
	cg26266427-chr6:31243846:SNP	cg26266427	Body	NM_019105	TNXB	Island	chr6	32063838	chr6:31243846:SNP	rs2844613	819992	-0.275827	0.0130421	2.82e-99	20482	T	G	0.1696	0.0182	TRUE	26	---?-------?--?-----?---?????-?-----	40.5	42.0216	0.01788	0.0030794	-0.275473	0.0179672	4.677e-53	0.021922	2.645e-36	913	FALSE	1
	cg26266427-chr6:31458460:SNP	cg26266427	Body	NM_019105	TNXB	Island	chr6	32063838	chr6:31458460:SNP	rs2428498	605378	-0.152586	0.0106603	1.803e-46	19957	A	G	0.3276	0.0258	TRUE	26	---?---?-?-?--------?---????--?-----	40.5	41.9978	0.01798	0.0020537	-0.157389	0.0146417	5.968e-27	0.0179083	1.59e-17	913	FALSE	1
	cg26266427-chr6:32314182:INDEL	cg26266427	Body	NM_019105	TNXB	Island	chr6	32063838	chr6:32314182:INDEL	chr6:32314182:INDEL	250344	-0.188115	0.0119514	8.049e-56	14674	I	D	0.3912	0.0422	TRUE	22	+++?+++???+?++?+++++?+?+????++??++++	31.9	30.8435	0.0763	0.0014995	-0.186521	0.0150978	4.621e-35	0.0175535	8.502e-27	913	FALSE	1
	cg26266427-chr6:32433981:SNP	cg26266427	Body	NM_019105	TNXB	Island	chr6	32063838	chr6:32433981:SNP	rs9268952	370143	-0.193355	0.0202461	0	6521	T	C	0.2553	0.0273	TRUE	12	?--??--??????-??-?--???-?????????---	19.3	13.6348	0.2539	0.0012122	-0.191062	0.0231745	1.659e-16	0.0250957	1.311e-14	913	FALSE	1
	cg26266427-chr6:31878721:SNP	cg26266427	Body	NM_019105	TNXB	Island	chr6	32063838	chr6:31878721:SNP	rs113421621	185117	0.453424	0.0302786	1.068e-50	18879	T	C	0.0316	0.0085	TRUE	25	++++++??+++?++?++++??+++????++?+++-+	5.5	25.3955	0.3845	0.0013595	0.451794	0.031547	1.611e-46	0.0320391	1.81e-45	913	FALSE	1
	cg26266427-chr6:31219913:SNP	cg26266427	Body	NM_019105	TNXB	Island	chr6	32063838	chr6:31219913:SNP	rs28397304	843925	0.0817064	0.01307	4.067e-10	19327	A	G	0.1906	0.0259	TRUE	24	+++?-+++?++?++?--+++??++????++??++-+	0	16.8863	0.8148	0	0.0817064	0.01307	4.067e-10	0.01307	4.067e-10	913	FALSE	1
	cg26266427-chr6:31269946:SNP	cg26266427	Body	NM_019105	TNXB	Island	chr6	32063838	chr6:31269946:SNP	rs12211087	793892	0.226574	0.0178216	4.979e-37	19346	A	T	0.0897	0.0081	TRUE	24	+++?++++?++?++?+++++??++????++??-+-+	15.5	27.2169	0.2468	0.0014272	0.228439	0.019985	2.942e-30	0.0210891	6.347e-27	913	FALSE	1
	cg26266427-chr6:31453870:SNP	cg26266427	Body	NM_019105	TNXB	Island	chr6	32063838	chr6:31453870:SNP	rs2523699	609968	-0.153218	0.0139485	0	12256	G	A	0.2945	0.0153	TRUE	16	?++??++???+??+??++++??++?????+???+++	43.3	26.4634	0.03343	0.0024981	-0.16018	0.0200295	1.273e-15	0.0246083	4.776e-10	913	FALSE	1
	cg26266427-chr6:32766593:SNP	cg26266427	Body	NM_019105	TNXB	Island	chr6	32063838	chr6:32766593:SNP	rs7383606	702755	-0.162923	0.0100815	9.565e-59	21434	T	C	0.3363	0.0274	TRUE	28	-----------?--?-----?----????-?-----	36.5	42.494	0.0294	0.0016639	-0.163669	0.0133124	9.69e-35	0.0158668	9.804e-25	913	FALSE	1
	cg26266427-chr6:32805049:SNP	cg26266427	Body	NM_019105	TNXB	Island	chr6	32063838	chr6:32805049:SNP	rs2239701	741211	-0.115429	0.0092877	1.839e-35	23244	C	T	0.441	0.02	TRUE	29	++-++++++++?+++++++??+++????++++++++	12.7	32.0624	0.272	0.000369	-0.114919	0.0101889	1.669e-29	0.0106352	1.92e-27	913	FALSE	1
	cg26266427-chr6:30226123:SNP	cg26266427	Body	NM_019105	TNXB	Island	chr6	32063838	chr6:30226123:SNP	rs3094077		-0.150403	0.0143597	1.137e-25	17082	T	C	0.1659	0.0212	FALSE	24	---?----?--?--?-----?+?+?????-?---+-	31.5	33.5642	0.07173	0.0023111	-0.142433	0.018124	3.877e-15	0.0209553	7.108e-13	913	FALSE	1
	cg26266427-chr6:32765130:SNP	cg26266427	Body	NM_019105	TNXB	Island	chr6	32063838	chr6:32765130:SNP	rs2621373	701292	0.114056	0.0104104	6.221e-28	21458	C	T	0.3077	0.0378	TRUE	28	---?----+--?--?-----?---+???--?-----	27.8	37.4185	0.08752	0.001194	0.112091	0.0128376	2.514e-18	0.0144275	2.669e-15	913	FALSE	1
	cg26266427-chr6:32565707:SNP	cg26266427	Body	NM_019105	TNXB	Island	chr6	32063838	chr6:32565707:SNP	rs9270642	501869	-0.200343	0.0159399	3.141e-36	8841	T	G	0.3289	0.0295	TRUE	14	---?-?-?????--?---??????????-???-?--	52.4	27.3333	0.0112	0.0040587	-0.195529	0.0246811	2.334e-15	0.0335146	2.262e-09	913	FALSE	1
	cg26266427-chr6:31507834:SNP	cg26266427	Body	NM_019105	TNXB	Island	chr6	32063838	chr6:31507834:SNP	rs35340190	556004	0.375818	0.0380791	5.649e-23	19688	T	C	0.0191	0.0051	TRUE	24	+-?+-+?++++?+-+++++??+++????++++???-	33.1	34.3997	0.05959	0.0179591	0.366147	0.0501522	2.862e-13	0.0569526	4.145e-11	913	FALSE	1
	cg26266427-chr6:32761398:SNP	cg26266427	Body	NM_019105	TNXB	Island	chr6	32063838	chr6:32761398:SNP	rs9276717	697560	0.226876	0.01877	1.235e-33	20971	A	C	0.0771	0.0144	TRUE	27	+++?+++++++?++?+-+++?++++????+?+++-+	31.3	37.8247	0.06287	0.0044151	0.212052	0.0237848	4.858e-19	0.0273065	9.692e-17	913	FALSE	1
	cg26266427-chr6:32591332:SNP	cg26266427	Body	NM_019105	TNXB	Island	chr6	32063838	chr6:32591332:SNP	rs9271600	527494	0.18958	0.0112116	3.842e-64	16366	G	T	0.4291	0.0288	TRUE	21	---?---???-?--?-----??--????-???----	24.6	26.5391	0.1487	0.0008881	0.187045	0.0135707	3.228e-43	0.0148772	3.412e-37	913	FALSE	1
	cg26266427-chr6:32434058:SNP	cg26266427	Body	NM_019105	TNXB	Island	chr6	32063838	chr6:32434058:SNP	rs9268956	370220	-0.185621	0.01842	6.974e-24	7700	A	G	0.2651	0.0331	TRUE	13	?--??--???-??-??-?--???-?????????---	20.8	15.1587	0.2329	0.0011969	-0.184786	0.0214073	6.032e-18	0.0232687	1.496e-15	913	FALSE	1
	cg26266427-chr6:32314738:SNP	cg26266427	Body	NM_019105	TNXB	Island	chr6	32063838	chr6:32314738:SNP	rs3132964	250900	0.137839	0.012403	1.079e-28	18140	T	C	0.2366	0.031	TRUE	26	+++?++++?++?++?+++++?+?++???-+?++++-	28.2	34.8078	0.09174	0.0015901	0.134658	0.015152	6.27e-19	0.0172688	1.44e-15	913	FALSE	1
	cg26266427-chr6:32745527:SNP	cg26266427	Body	NM_019105	TNXB	Island	chr6	32063838	chr6:32745527:SNP	rs12661352	681689	0.22419	0.0189041	1.925e-32	20970	T	G	0.0759	0.0136	TRUE	27	+++?+++++++?++?+-+++?++++????+?+++-+	30.5	37.4012	0.06875	0.0043178	0.210304	0.0237925	9.65e-19	0.0271937	1.663e-16	913	FALSE	1
	cg26266427-chr6:32636376:SNP	cg26266427	Body	NM_019105	TNXB	Island	chr6	32063838	chr6:32636376:SNP	rs2856698	572538	-0.198035	0.0145187	2.316e-42	10707	G	C	0.3225	0.0165	TRUE	16	+++?+?+?????++?+++??????????+??+++++	57.9	35.6164	0.002007	0.004774	-0.198056	0.023885	1.113e-16	0.0344735	9.217e-09	913	FALSE	1
	cg26266427-chr6:32433538:SNP	cg26266427	Body	NM_019105	TNXB	Island	chr6	32063838	chr6:32433538:SNP	rs9268939	369700	-0.194231	0.0174329	7.863e-29	8419	T	C	0.2705	0.0345	TRUE	14	?--??--???-??-??-?--???-?????-???---	16.1	15.4866	0.278	0.0008348	-0.194003	0.0194985	2.531e-23	0.0207674	8.543e-21	913	FALSE	1
	cg26266427-chr6:32756047:INDEL	cg26266427	Body	NM_019105	TNXB	Island	chr6	32063838	chr6:32756047:INDEL	chr6:32756047:INDEL	692209	0.123265	0.013049	3.509e-21	12265	I	D	0.387	0.0317	TRUE	16	?--??--???-??-??+---??--?????-???---	26.1	20.3076	0.1604	0.0010063	0.123585	0.0160874	1.565e-14	0.0176663	3.007e-12	913	FALSE	1
	cg26266427-chr6:32397712:SNP	cg26266427	Body	NM_019105	TNXB	Island	chr6	32063838	chr6:32397712:SNP	rs3129851	333874	-0.155125	0.0117935	1.627e-39	17166	C	A	0.3098	0.0347	TRUE	24	+++?++++?++?++?+++++?+?+?????+?+++++	41.5	39.3339	0.01823	0.0024076	-0.154844	0.0161615	9.608e-22	0.0201689	1.457e-14	913	FALSE	1
	cg26266427-chr6:32775001:SNP	cg26266427	Body	NM_019105	TNXB	Island	chr6	32063838	chr6:32775001:SNP	rs6917315	711163	-0.173842	0.0097249	1.816e-71	23290	T	C	0.3328	0.0288	TRUE	29	------?----?--------?----????-------	37.6	44.862	0.02278	0.0016805	-0.174501	0.0129693	2.883e-41	0.0155814	6.616e-29	913	FALSE	1
	cg26266427-chr6:32389545:SNP	cg26266427	Body	NM_019105	TNXB	Island	chr6	32063838	chr6:32389545:SNP	rs3135364	325707	-0.181829	0.0130416	0	17157	G	A	0.2236	0.0214	TRUE	24	+++?++++?++?++?+++++?+?+?????+?+++++	15	27.0736	0.2528	0.000734	-0.181739	0.0144831	4.06e-36	0.0153515	2.3e-32	913	FALSE	1
	cg26266427-chr6:30838043:SNP	cg26266427	Body	NM_019105	TNXB	Island	chr6	32063838	chr6:30838043:SNP	rs2535341		-0.146239	0.012976	0	17571	C	G	0.2102	0.0254	FALSE	25	---?----?--?--?-----?-?+????--?-----	16	28.582	0.2363	0.0008164	-0.142019	0.0145383	1.535e-22	0.0154533	2.985e-21	913	FALSE	1
	cg26266427-chr6:32451963:SNP	cg26266427	Body	NM_019105	TNXB	Island	chr6	32063838	chr6:32451963:SNP	rs71565336	388125	0.140376	0.0135452	3.632e-25	12700	A	G	0.3257	0.0464	TRUE	19	+++?+++???+??+?+++++???+????+???++-+	16.2	21.4833	0.2557	0.0006904	0.139469	0.0152444	5.751e-20	0.0161663	3.847e-18	913	FALSE	1
	cg26266427-chr6:31300197:SNP	cg26266427	Body	NM_019105	TNXB	Island	chr6	32063838	chr6:31300197:SNP	rs79158921	763641	-0.333083	0.0143548	0	20053	A	G	0.1397	0.0188	TRUE	25	---?----?--?--?-----??--????--?-----	19.6	29.8384	0.1902	0.0012839	-0.335556	0.016697	7.88e-90	0.0178468	9.824e-78	913	FALSE	1
	cg26266427-chr6:31705864:SNP	cg26266427	Body	NM_019105	TNXB	Island	chr6	32063838	chr6:31705864:SNP	rs3101018	357974	-0.432008	0.0140262	2.61e-208	23285	T	C	0.1246	0.02	TRUE	29	------?----?--------?---????--------	26.5	38.1	0.09652	0.0021004	-0.434508	0.0172428	4.07e-140	0.0190856	1.95e-113	913	FALSE	1
	cg26266427-chr6:32574787:SNP	cg26266427	Body	NM_019105	TNXB	Island	chr6	32063838	chr6:32574787:SNP	rs628754	510949	-0.128513	0.0116306	2.204e-28	15233	A	G	0.4222	0.0483	TRUE	20	---?---???-?--?-----??--????-???-?--	33.5	28.5743	0.07298	0.0014099	-0.129321	0.0151894	1.682e-17	0.0174914	2.024e-13	913	FALSE	1
	cg26266427-chr6:32754615:SNP	cg26266427	Body	NM_019105	TNXB	Island	chr6	32063838	chr6:32754615:SNP	rs28986400	690777	0.258117	0.0239561	4.538e-27	12753	G	A	0.08	0.0138	TRUE	17	?--??--???-??-??+---??---????-???-+-	36.3	25.1339	0.0675	0.0058397	0.238858	0.0324069	1.699e-13	0.0376319	6.935e-12	913	FALSE	1
	cg26266427-chr6:32769926:SNP	cg26266427	Body	NM_019105	TNXB	Island	chr6	32063838	chr6:32769926:SNP	rs2199874	706088	0.120011	0.0097202	5.084e-35	24155	G	A	0.3157	0.0343	TRUE	30	--------+--?--------?---+????-------	27.4	39.9326	0.08505	0.0010863	0.118589	0.0119126	2.4e-23	0.0133846	3.064e-19	913	FALSE	1
	cg26266427-chr6:32434349:SNP	cg26266427	Body	NM_019105	TNXB	Island	chr6	32063838	chr6:32434349:SNP	rs9268969	370511	0.149069	0.0106925	3.551e-44	20068	T	C	0.3331	0.042	TRUE	25	+++?++++?++?++?+++++??+++????+?+++-+	16.1	28.5966	0.2357	0.0005578	0.147785	0.0120265	1.047e-34	0.0127404	1.268e-31	913	FALSE	1
	cg26266427-chr6:31069448:SNP	cg26266427	Body	NM_019105	TNXB	Island	chr6	32063838	chr6:31069448:SNP	rs9263564	994390	-0.139631	0.0134232	2.421e-25	12263	A	G	0.3355	0.0132	TRUE	16	?--??--???-??-??----??--?????-???---	20.5	18.8661	0.2199	0.0007806	-0.141653	0.0158956	5.036e-19	0.0168829	1.333e-16	913	FALSE	1
	cg26266427-chr6:32432007:SNP	cg26266427	Body	NM_019105	TNXB	Island	chr6	32063838	chr6:32432007:SNP	rs9268901	368169	-0.185193	0.0124112	2.394e-50	16902	T	G	0.2638	0.0329	TRUE	24	---?----?--?--?-----?-?-????--??----	34.1	34.9143	0.05304	0.0019427	-0.184254	0.0159093	5.112e-31	0.0188404	8.4e-23	913	FALSE	1
	cg26266427-chr6:32430814:SNP	cg26266427	Body	NM_019105	TNXB	Island	chr6	32063838	chr6:32430814:SNP	rs7747025	366976	-0.187874	0.0121223	3.569e-54	17654	G	A	0.265	0.0324	TRUE	25	+++?++++?++?++?+++++?+?+????++?+++++	34.7	36.7387	0.04646	0.0019758	-0.187501	0.0155815	2.367e-33	0.0185566	4.308e-24	913	FALSE	1
	cg26266427-chr6:31718396:SNP	cg26266427	Body	NM_019105	TNXB	Island	chr6	32063838	chr6:31718396:SNP	rs3117573	345442	-0.429102	0.0137691	3.26e-213	24148	G	C	0.1247	0.0198	TRUE	30	+++++++++++?++++++++?+++????++++++++	25	38.6426	0.1087	0.0019272	-0.431007	0.0166847	3.83e-147	0.0183473	5.71e-121	913	FALSE	1
	cg26266427-chr6:32601769:SNP	cg26266427	Body	NM_019105	TNXB	Island	chr6	32063838	chr6:32601769:SNP	rs9272191	537931	-0.249183	0.0136886	4.82e-74	14694	T	G	0.2321	0.0248	TRUE	20	---?-?--?--?--?-----????????-???----	39	31.135	0.03902	0.0024319	-0.247181	0.0182685	1.034e-41	0.0224312	1.137e-28	913	FALSE	1
	cg26266427-chr6:31496569:SNP	cg26266427	Body	NM_019105	TNXB	Island	chr6	32063838	chr6:31496569:SNP	rs2516482	567269	-0.223124	0.0118162	1.575e-79	23662	G	A	0.1863	0.0201	TRUE	29	++++++++-++?++++++++?+++?????+++++++	38.7	45.6722	0.01884	0.0026038	-0.223156	0.0159918	2.96e-44	0.0192739	5.422e-31	913	FALSE	1
	cg26266427-chr6:32596040:SNP	cg26266427	Body	NM_019105	TNXB	Island	chr6	32063838	chr6:32596040:SNP	rs9271904	532202	-0.286666	0.0206638	9.248e-44	6556	G	A	0.2263	0.0314	TRUE	11	?++???+???+??+??++++??????????????++	24.3	13.2103	0.2122	0.001559	-0.288547	0.0246472	1.173e-31	0.0272975	8.495e-26	913	FALSE	1
	cg26266427-chr6:31442782:SNP	cg26266427	Body	NM_019105	TNXB	Island	chr6	32063838	chr6:31442782:SNP	rs3131643	621056	-0.310408	0.0137185	2.35e-113	20482	A	G	0.1574	0.0241	TRUE	26	---?-------?--?-----?---?????-?-----	40.4	41.9478	0.01821	0.0033987	-0.315217	0.0189905	7.132e-62	0.0230184	1.911e-41	913	FALSE	1
	cg26266427-chr6:30345118:SNP	cg26266427	Body	NM_019105	TNXB	Island	chr6	32063838	chr6:30345118:SNP	rs3132630		-0.194658	0.0161903	2.686e-33	16252	T	C	0.1349	0.0211	FALSE	23	---?----?--?--?-----?+?+?????-?-?-+-	31.5	32.1059	0.07561	0.0028267	-0.18388	0.0205984	4.381e-19	0.0236274	1.742e-16	913	FALSE	1
	cg26266427-chr6:32608459:INDEL	cg26266427	Body	NM_019105	TNXB	Island	chr6	32063838	chr6:32608459:INDEL	chr6:32608459:INDEL	544621	-0.222482	0.0193923	1.809e-30	6556	D	I	0.28	0.0347	TRUE	10	-???-???????--?-?-??????????-???-?--	48.6	17.5014	0.04142	0.003752	-0.221853	0.0290476	2.213e-14	0.0377103	3.64e-09	913	FALSE	1
	cg26266427-chr6:31818461:SNP	cg26266427	Body	NM_019105	TNXB	Island	chr6	32063838	chr6:31818461:SNP	rs13220680	245377	0.299093	0.0243001	8.17e-35	19338	T	C	0.073	0.074	TRUE	26	++++++++++??++?+-++??+++????++?+++-+	44.8	45.3164	0.007695	0.0130042	0.303789	0.0359464	2.884e-17	0.0440477	1.12e-11	913	FALSE	1
	cg26266427-chr6:31312867:INDEL	cg26266427	Body	NM_019105	TNXB	Island	chr6	32063838	chr6:31312867:INDEL	chr6:31312867:INDEL	750971	0.134208	0.0116012	5.951e-31	17077	I	D	0.3219	0.0528	TRUE	22	---?---???-?--?-----??--????--??--+-	33.7	31.6555	0.06342	0.00154	0.133587	0.0150367	6.448e-19	0.0174876	1.661e-14	913	FALSE	1
	cg26266427-chr6:32580632:SNP	cg26266427	Body	NM_019105	TNXB	Island	chr6	32063838	chr6:32580632:SNP	rs79838044	516794	-0.219938	0.0113447	9.986e-84	18624	C	T	0.2863	0.032	TRUE	23	+++?++++?++?++?+++++??++????+???++++	42.1	38.0079	0.01828	0.0022077	-0.221302	0.0158392	2.318e-44	0.0195996	3.196e-29	913	FALSE	1
	cg26266427-chr6:32387221:SNP	cg26266427	Body	NM_019105	TNXB	Island	chr6	32063838	chr6:32387221:SNP	rs3135369	323383	-0.184643	0.0123136	7.916e-51	17645	A	G	0.2497	0.026	TRUE	25	---?----?--?--?-----?-?--????-?-----	50	47.9972	0.002526	0.0038399	-0.183645	0.0182154	6.646e-24	0.0246258	6.483e-14	913	FALSE	1
	cg26266427-chr6:31320164:SNP	cg26266427	Body	NM_019105	TNXB	Island	chr6	32063838	chr6:31320164:SNP	rs2442723	743674	-0.244836	0.0132069	1.011e-76	17286	A	G	0.2081	0.0192	TRUE	22	---??--???-?--?-----??--????--?-----	33.9	31.7584	0.06193	0.002025	-0.246583	0.0172799	3.371e-46	0.0199729	1.514e-34	913	FALSE	1
	cg26266427-chr6:32408012:SNP	cg26266427	Body	NM_019105	TNXB	Island	chr6	32063838	chr6:32408012:SNP	rs3129876	344174	-0.146051	0.0118087	3.891e-35	17165	A	G	0.3142	0.036	TRUE	24	---?----?--?--?-----?-?-?????-?-----	32.5	34.0989	0.06374	0.0016402	-0.14556	0.0149811	2.571e-22	0.0175071	7.282e-17	913	FALSE	1
	cg26266427-chr6:32752641:SNP	cg26266427	Body	NM_019105	TNXB	Island	chr6	32063838	chr6:32752641:SNP	rs13219960	688803	0.225768	0.0185995	6.612e-34	21456	C	T	0.0769	0.0143	TRUE	28	---?-------?--?-+---?----???--?---+-	29.4	38.2581	0.07387	0.00412	0.21174	0.0232286	7.831e-20	0.0263549	1.067e-17	913	FALSE	1
	cg26266427-chr6:31345513:SNP	cg26266427	Body	NM_019105	TNXB	Island	chr6	32063838	chr6:31345513:SNP	rs28366078	718325	0.206438	0.0184835	5.797e-29	20038	G	T	0.0916	0.0308	TRUE	26	---?--?-?--?--?-----?----???--?-----	13.7	28.9642	0.2654	0.0014338	0.205669	0.020432	7.808e-24	0.0214144	5.411e-22	913	FALSE	1
	cg26266427-chr6:31308630:SNP	cg26266427	Body	NM_019105	TNXB	Island	chr6	32063838	chr6:31308630:SNP	rs9265797	755208	-0.163685	0.0119198	6.508e-43	15566	A	G	0.3366	0.034	TRUE	20	?--??---?--??-?-----??--?????-?-?---	33.5	28.5601	0.07323	0.0014701	-0.167803	0.0154501	1.769e-27	0.0179174	6.507e-20	913	FALSE	1
	cg26266427-chr6:31304672:SNP	cg26266427	Body	NM_019105	TNXB	Island	chr6	32063838	chr6:31304672:SNP	rs114709589	759166	0.137879	0.0139329	0	10242	A	G	0.4931	0.0422	TRUE	13	?++??+????+??+??++?+??++?????????+++	27.9	16.6403	0.1636	0.0010391	0.140897	0.0176184	1.274e-15	0.0193207	9.586e-13	913	FALSE	1
	cg26266427-chr6:32330351:SNP	cg26266427	Body	NM_019105	TNXB	Island	chr6	32063838	chr6:32330351:SNP	rs28366184	266513	0.236941	0.0207444	3.248e-30	17657	G	A	0.0787	0.0201	TRUE	25	---?----?--?--?-----?-?--????-?----+	0	16.7283	0.86	0	0.236941	0.0207444	3.248e-30	0.0207444	3.248e-30	913	FALSE	1
	cg26266427-chr6:31320467:SNP	cg26266427	Body	NM_019105	TNXB	Island	chr6	32063838	chr6:31320467:SNP	rs9468975	743371	0.122103	0.0122024	1.427e-23	17073	T	C	0.276	0.0392	TRUE	22	+++?-++???+?++?+++++??++????++??++++	33.1	31.3758	0.06763	0.0016559	0.120585	0.0156682	1.402e-14	0.0182314	2.121e-11	913	FALSE	1
	cg26266427-chr6:31265490:SNP	cg26266427	Body	NM_019105	TNXB	Island	chr6	32063838	chr6:31265490:SNP	rs2247056	798348	-0.192301	0.0110586	9.944e-68	20132	T	C	0.2835	0.0397	TRUE	26	---?+------?--?-----?----????-?-?---	0	19.8591	0.7542	0	-0.192301	0.0110586	9.944e-68	0.0110586	9.944e-68	913	FALSE	1
	cg26266427-chr6:31916707:SNP	cg26266427	Body	NM_019105	TNXB	Island	chr6	32063838	chr6:31916707:SNP	rs45600936	147131	0.733232	0.0788166	1.365e-20	5366	T	C	0.0169	0.0067	TRUE	10	???+++??+??????++?++?+???????????+??	40.6	15.1502	0.08689	0.0431553	0.731427	0.104792	2.956e-12	0.132677	3.267e-08	913	FALSE	1
	cg26266427-chr6:32559572:SNP	cg26266427	Body	NM_019105	TNXB	Island	chr6	32063838	chr6:32559572:SNP	rs28366261	495734	0.206524	0.0241963	1.398e-17	6563	C	G	0.1602	0.0312	TRUE	10	+???+???????++?+?+??????????+???+?-+	38.3	14.5984	0.1026	0.003927	0.202852	0.033652	1.661e-09	0.0392476	1.424e-07	913	FALSE	1
	cg26266427-chr6:30857894:SNP	cg26266427	Body	NM_019105	TNXB	Island	chr6	32063838	chr6:30857894:SNP	rs1264322		-0.215953	0.0156465	2.479e-43	17092	A	G	0.1417	0.025	FALSE	24	---?----?--?--?-----?-?+?????-?-----	29.4	32.576	0.08875	0.0024957	-0.207324	0.0196108	4.021e-26	0.0221609	1.942e-22	913	FALSE	1
	cg26266427-chr6:32589301:SNP	cg26266427	Body	NM_019105	TNXB	Island	chr6	32063838	chr6:32589301:SNP	rs9271501	525463	0.197143	0.0140862	1.661e-44	10174	G	A	0.4574	0.03	TRUE	16	---?-?-?????--?-----????????-???-?+-	20.9	18.9599	0.2156	0.0008631	0.195808	0.0164439	1.08e-32	0.0178049	1.708e-28	913	FALSE	1
	cg26266427-chr6:32748937:SNP	cg26266427	Body	NM_019105	TNXB	Island	chr6	32063838	chr6:32748937:SNP	rs28986342	685099	0.226802	0.0192368	4.395e-32	20234	C	T	0.0765	0.0149	TRUE	26	---?-------?--?-+---?---????--??--+-	28.1	34.7715	0.09242	0.0038428	0.213983	0.0237929	2.393e-19	0.0267556	2.315e-17	913	FALSE	1
	cg26266427-chr6:31908761:SNP	cg26266427	Body	NM_019105	TNXB	Island	chr6	32063838	chr6:31908761:SNP	rs497239	155077	0.346409	0.0156522	1.57e-108	24636	C	T	0.0949	0.017	TRUE	31	-----------?----+---?----???--------	30.3	43.0689	0.05778	0.0033571	0.342888	0.0195868	1.288e-68	0.0224708	1.278e-53	913	FALSE	1
	cg26266427-chr6:31337815:SNP	cg26266427	Body	NM_019105	TNXB	Island	chr6	32063838	chr6:31337815:SNP	rs9266440	726023	-0.101088	0.0102416	5.599e-23	19119	T	C	0.4339	0.0381	TRUE	24	---?---??--?--?-----?---?????-?-+---	41	38.966	0.02001	0.0017877	-0.105066	0.0141401	1.083e-13	0.0173511	5.676e-09	913	FALSE	1
	cg26266427-chr6:30299245:SNP	cg26266427	Body	NM_019105	TNXB	Island	chr6	32063838	chr6:30299245:SNP	rs3094067		-0.200261	0.0164499	4.277e-34	17092	G	T	0.1256	0.0205	FALSE	24	+++?++++?++?++?+++++?-?-?????+?+++-+	32.3	33.9714	0.06557	0.0031585	-0.190589	0.0210928	1.629e-19	0.0242969	1.69e-16	913	FALSE	1
	cg26266427-chr6:32777900:SNP	cg26266427	Body	NM_019105	TNXB	Island	chr6	32063838	chr6:32777900:SNP	rs2857118	714062	0.114289	0.0097919	1.776e-31	24156	A	G	0.3083	0.0348	TRUE	30	++++++++-++?++++++++?++++????+++++++	25	38.6903	0.1077	0.0009772	0.112673	0.0117886	1.204e-21	0.0130638	2.162e-18	913	FALSE	1
	cg26266427-chr6:32298942:SNP	cg26266427	Body	NM_019105	TNXB	Island	chr6	32063838	chr6:32298942:SNP	rs3132959	235104	0.141377	0.0125485	1.922e-29	17657	G	A	0.2374	0.0306	TRUE	25	---?----?--?--?-----?-?--????-?----+	18.9	29.601	0.1983	0.0009313	0.13973	0.0143004	1.499e-22	0.015477	6.562e-20	913	FALSE	1
	cg26266427-chr6:32936748:INDEL	cg26266427	Body	NM_019105	TNXB	Island	chr6	32063838	chr6:32936748:INDEL	chr6:32936748:INDEL	872910	-0.204472	0.0194459	7.376e-26	11547	D	I	0.1307	0.0137	TRUE	15	?--??--???-??-??----??--?????????---	0	11.1241	0.6763	0	-0.204472	0.0194459	7.376e-26	0.0194459	7.376e-26	913	FALSE	1
	cg26266427-chr6:32749122:SNP	cg26266427	Body	NM_019105	TNXB	Island	chr6	32063838	chr6:32749122:SNP	rs28986348	685284	0.224963	0.0186731	2.001e-33	21455	T	C	0.0765	0.0143	TRUE	28	+++?+++++++?++?+-+++?++++???++?+++-+	29.2	38.1152	0.07606	0.0040975	0.211743	0.0232557	8.627e-20	0.0263604	1.412e-17	913	FALSE	1
	cg26266427-chr6:31101904:SNP	cg26266427	Body	NM_019105	TNXB	Island	chr6	32063838	chr6:31101904:SNP	rs13212902	961934	0.230474	0.0161857	5.221e-46	23241	T	C	0.0911	0.0106	TRUE	29	++++++?++++?++++++++?+++????++++-+-+	29.9	39.929	0.0671	0.0032885	0.233243	0.0201705	6.302e-31	0.0230814	1.768e-23	913	FALSE	1
	cg26266427-chr6:32380208:SNP	cg26266427	Body	NM_019105	TNXB	Island	chr6	32063838	chr6:32380208:SNP	rs3129963	316370	-0.226808	0.0137222	2.288e-61	17167	G	A	0.193	0.02	TRUE	24	+++?++++?++?++?+++++?+?+?????+?+++++	50	46.0381	0.002959	0.0045949	-0.229788	0.0204252	2.31e-29	0.0274672	1.489e-16	913	FALSE	1
	cg26266427-chr6:32587001:SNP	cg26266427	Body	NM_019105	TNXB	Island	chr6	32063838	chr6:32587001:SNP	rs557048	523163	-0.22879	0.0162236	0	9246	T	C	0.2788	0.0216	TRUE	13	?--??--??????-??----??--??????????--	29.4	16.9963	0.1497	0.001543	-0.233943	0.0210063	8.302e-29	0.0229785	2.358e-23	913	FALSE	1
	cg26266427-chr6:32774274:SNP	cg26266427	Body	NM_019105	TNXB	Island	chr6	32063838	chr6:32774274:SNP	rs6912056	710436	-0.211707	0.0111544	2.507e-80	24639	A	G	0.204	0.0241	TRUE	31	-----------?--------?----???--------	0	28.7098	0.5329	0	-0.211707	0.0111544	2.507e-80	0.0111544	2.507e-80	913	FALSE	1
	cg26266427-chr6:32379101:SNP	cg26266427	Body	NM_019105	TNXB	Island	chr6	32063838	chr6:32379101:SNP	rs5007259	315263	-0.17213	0.0106345	0	17652	T	C	0.4776	0.023	TRUE	25	---?----?--?--?-----?-?--????-?-----	30.1	34.3576	0.07851	0.0012368	-0.173599	0.0131869	1.405e-39	0.015224	1.219e-29	913	FALSE	1
	cg26266427-chr6:32432664:SNP	cg26266427	Body	NM_019105	TNXB	Island	chr6	32063838	chr6:32432664:SNP	rs9268922	368826	-0.187769	0.0121273	0	17651	G	T	0.2648	0.0324	TRUE	25	+++?++++?++?++?+++++?+?+????++?+++++	35.2	37.0115	0.04364	0.0020199	-0.187294	0.0156518	5.334e-33	0.018702	1.017e-23	913	FALSE	1
	cg26266427-chr6:31242191:SNP	cg26266427	Body	NM_019105	TNXB	Island	chr6	32063838	chr6:31242191:SNP	rs12111032	821647	0.135473	0.0124021	8.908e-28	16823	G	A	0.2701	0.0346	TRUE	22	---?---???-?--?-----?---?????-?-?---	0	13.3224	0.8969	0	0.135473	0.0124021	8.908e-28	0.0124021	8.908e-28	913	FALSE	1
	cg26266427-chr6:31055536:INDEL	cg26266427	Body	NM_019105	TNXB	Island	chr6	32063838	chr6:31055536:INDEL	chr6:31055536:INDEL		-0.105933	0.0105695	0	17914	D	I	0.3617	0.0259	FALSE	24	---?---?-?-?--?++---?---????--??--+-	19.7	28.6601	0.1918	0.0006777	-0.104801	0.0123216	1.809e-17	0.0131706	8.752e-16	913	FALSE	1
	cg26266427-chr6:32583274:SNP	cg26266427	Body	NM_019105	TNXB	Island	chr6	32063838	chr6:32583274:SNP	rs13208697	519436	0.233111	0.0154625	2.332e-51	13803	T	G	0.1863	0.0259	TRUE	20	+++?++++?+??++?+++++???+???????++?++	47.6	36.2682	0.009783	0.0044459	0.226933	0.0226555	1.288e-23	0.0295156	2.836e-15	913	FALSE	1
	cg26266427-chr6:32447014:SNP	cg26266427	Body	NM_019105	TNXB	Island	chr6	32063838	chr6:32447014:SNP	rs17203636	383176	0.139963	0.0118313	2.734e-32	14368	A	G	0.4535	0.0345	TRUE	21	+++?++++??+?++?+++++???+????+???++++	19.7	24.9024	0.2052	0.0007333	0.140523	0.0135901	4.639e-25	0.0147313	2.078e-21	913	FALSE	1
	cg26266427-chr6:32752840:SNP	cg26266427	Body	NM_019105	TNXB	Island	chr6	32063838	chr6:32752840:SNP	rs2857177	689002	0.116624	0.0099631	1.194e-31	20974	T	C	0.3854	0.0295	TRUE	27	+++?-++++++?++?+-+++?++++????+?+++++	18.4	31.8678	0.1975	0.0006167	0.115507	0.0114262	5.041e-24	0.0122116	1.294e-21	913	FALSE	1
	cg26266427-chr6:32275841:SNP	cg26266427	Body	NM_019105	TNXB	Island	chr6	32063838	chr6:32275841:SNP	rs9268180	212003	-0.204366	0.0124749	2.562e-60	18137	T	C	0.2303	0.0217	TRUE	26	---?----?--?--?+----?-?--???--?-----	13.5	28.9046	0.2679	0.0006408	-0.204362	0.013697	2.435e-50	0.0144232	1.421e-45	913	FALSE	1
	cg26266427-chr6:32367795:SNP	cg26266427	Body	NM_019105	TNXB	Island	chr6	32063838	chr6:32367795:SNP	rs2294878	303957	0.139543	0.0111042	3.216e-36	16308	T	G	0.4705	0.0267	TRUE	23	+++?++?+?++?++?+++++?+?+?????+?+++-+	0	21.0308	0.5188	0	0.139543	0.0111042	3.216e-36	0.0111042	3.216e-36	913	FALSE	1
	cg26266427-chr6:31083656:SNP	cg26266427	Body	NM_019105	TNXB	Island	chr6	32063838	chr6:31083656:SNP	rs3094217	980182	-0.13696	0.0090761	1.883e-51	24643	G	A	0.5085	0.039	TRUE	31	+++++++++++?++++++++?++++???++++++-+	0	27.2777	0.6087	0	-0.13696	0.0090761	1.883e-51	0.0090761	1.883e-51	913	FALSE	1
	cg26266427-chr6:32587846:SNP	cg26266427	Body	NM_019105	TNXB	Island	chr6	32063838	chr6:32587846:SNP	rs9271419	524008	0.187717	0.0129372	0	12233	T	C	0.4302	0.0286	TRUE	18	+++?+++??+??++?+++++????????+???+?-+	53.8	36.7596	0.003627	0.0035941	0.182337	0.0202582	2.244e-19	0.0279745	1.942e-11	913	FALSE	1
	cg26266427-chr6:32579003:SNP	cg26266427	Body	NM_019105	TNXB	Island	chr6	32063838	chr6:32579003:SNP	rs502055	515165	-0.22352	0.0111419	0	19350	C	T	0.2853	0.0311	TRUE	24	+++?++++?++?++?+++++??++????+??+++++	41.7	39.4568	0.01767	0.0021812	-0.225253	0.0154605	4.385e-48	0.0191141	1.369e-31	913	FALSE	1
	cg26266427-chr6:32753403:SNP	cg26266427	Body	NM_019105	TNXB	Island	chr6	32063838	chr6:32753403:SNP	rs12665315	689565	0.22719	0.0188029	1.303e-33	20969	G	A	0.077	0.0145	TRUE	27	---?-------?--?-+---?----????-?---+-	32	38.2263	0.05769	0.0045822	0.212448	0.023981	8.073e-19	0.0276447	2.066e-16	913	FALSE	1
	cg26266427-chr6:30063652:SNP	cg26266427	Body	NM_019105	TNXB	Island	chr6	32063838	chr6:30063652:SNP	rs1264706		-0.176403	0.0173813	3.348e-24	15288	C	G	0.1258	0.0211	FALSE	23	?--??---?--?--?-----?-?+????--?-----	20.9	27.8156	0.1819	0.0018673	-0.171716	0.0201953	1.851e-17	0.021976	9.982e-16	913	FALSE	1
	cg26266427-chr6:32750983:SNP	cg26266427	Body	NM_019105	TNXB	Island	chr6	32063838	chr6:32750983:SNP	rs28986354	687145	0.230758	0.0190084	6.496e-34	20722	T	A	0.0765	0.0147	TRUE	27	---?-------?--?-+---?----???--??--+-	30.7	37.4981	0.06736	0.0044067	0.21595	0.0240059	2.347e-19	0.0274145	3.85e-17	913	FALSE	1
	cg26266427-chr6:32862958:SNP	cg26266427	Body	NM_019105	TNXB	Island	chr6	32063838	chr6:32862958:SNP	rs72860374	799120	-0.352207	0.0166609	3.43e-99	20615	G	C	0.0971	0.0135	TRUE	26	++++?+?++++?++?++++??+++????++++++++	19.8	31.1759	0.1833	0.0018266	-0.357915	0.0194725	1.88e-75	0.0207767	1.86e-64	913	FALSE	1
	cg26266427-chr6:32723614:SNP	cg26266427	Body	NM_019105	TNXB	Island	chr6	32063838	chr6:32723614:SNP	rs9276557	659776	0.1584	0.0197552	0	20413	T	C	0.0788	0.0235	TRUE	26	+++?-+++?++?++?-++++?++++????+?++++-	22.7	32.323	0.1489	0.0030307	0.155215	0.0234281	3.468e-11	0.0255419	5.59e-10	913	FALSE	1
	cg26266427-chr6:32587090:SNP	cg26266427	Body	NM_019105	TNXB	Island	chr6	32063838	chr6:32587090:SNP	rs28383312	523252	0.173385	0.0120155	3.346e-47	14612	T	C	0.3926	0.0277	TRUE	21	+++?+++??+??++?+++++???+????+??+++-+	36.8	31.6543	0.04712	0.0018009	0.172424	0.0158473	1.43e-27	0.0190171	7.702e-20	913	FALSE	1
	cg26266427-chr6:32451847:SNP	cg26266427	Body	NM_019105	TNXB	Island	chr6	32063838	chr6:32451847:SNP	rs62405564	388009	0.240386	0.0378508	2.141e-10	5077	T	C	0.0799	0.0144	TRUE	7	+????????????+???+?????????????++?+-	0	4.01204	0.675	0	0.240386	0.0378508	2.141e-10	0.0378508	2.141e-10	913	FALSE	1
	cg26266427-chr6:32639036:SNP	cg26266427	Body	NM_019105	TNXB	Island	chr6	32063838	chr6:32639036:SNP	rs9274788	575198	0.119256	0.0159651	8.033e-14	10193	C	T	0.2558	0.0152	TRUE	16	---?-?-?????-+?-----????????-???-?+-	21.6	19.1255	0.2081	0.0011538	0.113434	0.0187054	1.326e-09	0.020356	4.67e-09	913	FALSE	1
	cg26266427-chr6:31325023:SNP	cg26266427	Body	NM_019105	TNXB	Island	chr6	32063838	chr6:31325023:SNP	rs9266210	738815	0.136177	0.0111594	2.997e-34	15735	C	T	0.5116	0.0158	TRUE	20	---?---???-?--?-----??--?????-???-+-	0	18.845	0.4668	0	0.136177	0.0111594	2.997e-34	0.0111594	2.997e-34	913	FALSE	1
	cg26266427-chr6:31289284:SNP	cg26266427	Body	NM_019105	TNXB	Island	chr6	32063838	chr6:31289284:SNP	rs9265170	774554	-0.109612	0.0127563	8.492e-18	12987	C	T	0.3898	0.0366	TRUE	17	?++??++???+??+??++++??++?????+?+?+-+	48.9	31.2914	0.01235	0.0027584	-0.119053	0.0192543	6.282e-10	0.0249477	1.115e-05	913	FALSE	1
	cg26266427-chr6:32741002:SNP	cg26266427	Body	NM_019105	TNXB	Island	chr6	32063838	chr6:32741002:SNP	rs28986328	677164	0.2201	0.0186814	4.845e-32	21454	C	T	0.0763	0.0143	TRUE	28	---?-------?--?-+---?----???--?---+-	28.5	37.7522	0.08186	0.0039702	0.207161	0.023151	3.612e-19	0.0261209	3.57e-17	913	FALSE	1
	cg26266427-chr6:32613372:SNP	cg26266427	Body	NM_019105	TNXB	Island	chr6	32063838	chr6:32613372:SNP	rs9273186	549534	-0.218241	0.0196885	1.489e-28	6285	T	A	0.2828	0.0355	TRUE	9	+???+???????+??+?+??????????+???+?++	36.3	12.5585	0.128	0.0021013	-0.214821	0.0262014	2.427e-16	0.0309074	1.652e-12	913	FALSE	1
	cg26266427-chr6:30834331:SNP	cg26266427	Body	NM_019105	TNXB	Island	chr6	32063838	chr6:30834331:SNP	rs2844656		-0.215342	0.0154684	0	17575	G	A	0.1417	0.0248	FALSE	25	+++?++++?++?++?+++++?+?-????++?+++++	26.9	32.8501	0.1073	0.002249	-0.207226	0.0190007	1.076e-27	0.0211724	2.675e-24	913	FALSE	1
	cg26266427-chr6:32234015:SNP	cg26266427	Body	NM_019105	TNXB	Island	chr6	32063838	chr6:32234015:SNP	rs3132928	170177	-0.192527	0.0124089	0	17655	A	G	0.2431	0.0231	TRUE	25	---?----?--?--?+----?-?--????-?-----	23.3	31.2836	0.1458	0.0011854	-0.192675	0.0146346	1.381e-39	0.0161748	1.143e-32	913	FALSE	1
	cg26266427-chr6:32560716:SNP	cg26266427	Body	NM_019105	TNXB	Island	chr6	32063838	chr6:32560716:SNP	rs28366295	496878	0.120641	0.014416	5.833e-17	11403	C	T	0.3117	0.0458	TRUE	17	-???--????-?--?-----???-????-???--+-	0	12.7894	0.6881	0	0.120641	0.014416	5.833e-17	0.014416	5.833e-17	913	FALSE	1
	cg26266427-chr6:32424882:SNP	cg26266427	Body	NM_019105	TNXB	Island	chr6	32063838	chr6:32424882:SNP	rs7763262	361044	-0.159905	0.0115788	2.214e-43	16573	T	C	0.3409	0.0296	TRUE	24	---?----?--?--?--?--?-?--????-?-----	27.2	31.5982	0.1088	0.0012214	-0.160724	0.0140684	3.158e-30	0.0159074	8.98e-24	913	FALSE	1
	cg26266427-chr6:32594403:SNP	cg26266427	Body	NM_019105	TNXB	Island	chr6	32063838	chr6:32594403:SNP	rs3104393	530565	0.119446	0.0142522	0	11272	T	C	0.3335	0.0399	TRUE	15	+++?+??+?++?+-?+?+??????????+???+?-+	3.7	14.5342	0.4107	0.0001198	0.119176	0.0146391	3.922e-16	0.014796	6.868e-16	913	FALSE	1
	cg26266427-chr6:31851768:SNP	cg26266427	Body	NM_019105	TNXB	Island	chr6	32063838	chr6:31851768:SNP	rs71563386	212070	0.541083	0.0540217	1.296e-23	10919	C	G	0.0146	0.0024	TRUE	16	?+?+-+?++?+?+??++?+??+++????+??????+	39.6	24.8238	0.05236	0.0333633	0.52055	0.0768785	1.278e-11	0.0894017	1.428e-09	913	FALSE	1
	cg26266427-chr6:31305043:SNP	cg26266427	Body	NM_019105	TNXB	Island	chr6	32063838	chr6:31305043:SNP	rs1634764	758795	-0.268502	0.0131377	7.77e-93	19300	T	G	0.179	0.0156	TRUE	24	---?----?--?--?-----??--????--??----	44.2	41.2022	0.01123	0.0033576	-0.270001	0.0187055	3.148e-47	0.0235349	3.785e-30	913	FALSE	1
	cg26266427-chr6:32029849:SNP	cg26266427	Body	NM_019105	TNXB	Island	chr6	32063838	chr6:32029849:SNP	rs2239690	33989	0.614312	0.0147804	0	24635	A	G	0.0989	0.0189	TRUE	31	+++++++++++?++++++++?++++???++++++++	51.6	61.9852	0.0005259	0.0073295	0.60343	0.0223727	3.17e-160	0.0305389	5.37e-90	913	FALSE	1
	cg26266427-chr6:31305246:SNP	cg26266427	Body	NM_019105	TNXB	Island	chr6	32063838	chr6:31305246:SNP	rs28367819	758592	-0.143818	0.0103385	0	18546	A	G	0.4993	0.0377	TRUE	23	---?---??--?--?-----??--????--??----	11.7	24.9239	0.3007	0.0003346	-0.1444	0.0112995	2.141e-37	0.0117125	1.174e-34	913	FALSE	1
	cg26266427-chr6:32804217:SNP	cg26266427	Body	NM_019105	TNXB	Island	chr6	32063838	chr6:32804217:SNP	rs3819714	740379	0.127574	0.0097995	9.608e-39	23286	A	G	0.3321	0.0294	TRUE	29	++++++?++++?++++++++?+++????++++++-+	0	26.8038	0.5289	0	0.127574	0.0097995	9.608e-39	0.0097995	9.608e-39	913	FALSE	1
	cg26266427-chr6:32672043:SNP	cg26266427	Body	NM_019105	TNXB	Island	chr6	32063838	chr6:32672043:SNP	rs1794274	608205	-0.356205	0.0159933	6.88e-110	15787	T	G	0.1429	0.0184	TRUE	22	---?---??--?--?-----???-????--??----	32.1	30.9379	0.0747	0.0027084	-0.355605	0.0202282	3.523e-69	0.0235619	1.235e-51	913	FALSE	1
	cg26266427-chr6:32596074:INDEL	cg26266427	Body	NM_019105	TNXB	Island	chr6	32063838	chr6:32596074:INDEL	chr6:32596074:INDEL	532236	0.118528	0.0136688	0	10935	I	D	0.5037	0.0417	TRUE	16	---?-?-???-?--?+--?-????????-???-?+-	39.5	24.8076	0.05259	0.0020104	0.11576	0.0186175	5.042e-10	0.022606	1.578e-07	913	FALSE	1
	cg26266427-chr6:31321883:SNP	cg26266427	Body	NM_019105	TNXB	Island	chr6	32063838	chr6:31321883:SNP	rs1056429	741955	0.165483	0.0161239	1.032e-24	17804	A	G	0.129	0.0303	TRUE	23	+++?-++???+?++?+++++??++????++?+++++	8.8	24.112	0.3414	0.0005924	0.164165	0.0173289	2.706e-21	0.0176718	7.658e-21	913	FALSE	1
	cg26266427-chr6:32068885:SNP	cg26266427	Body	NM_019105	TNXB	Island	chr6	32063838	chr6:32068885:SNP	rs113251500	5047	0.471446	0.0340439	1.305e-43	22090	A	G	0.0218	0.0062	TRUE	28	+++-++?+++??++++++++?+++????-++++++-	25.3	36.1538	0.112	0.0111515	0.464375	0.0408352	5.77e-30	0.0455858	4.551e-25	913	FALSE	1
	cg26266427-chr6:32987888:SNP	cg26266427	Body	NM_019105	TNXB	Island	chr6	32063838	chr6:32987888:SNP	rs17214290	924050	-0.297604	0.0201269	1.794e-49	23653	G	A	0.0578	0.01	TRUE	29	+++++++++++?++++++++?+++?????+++++++	0	21.7583	0.7924	0	-0.297604	0.0201269	1.794e-49	0.0201269	1.794e-49	913	FALSE	1
	cg26266427-chr6:32601005:SNP	cg26266427	Body	NM_019105	TNXB	Island	chr6	32063838	chr6:32601005:SNP	rs9272151	537167	-0.11329	0.0162772	3.402e-12	7825	G	A	0.4551	0.0485	TRUE	12	+++?+???????++?-?+??????????+???+?++	21.7	14.0544	0.23	0.0009201	-0.110885	0.0191662	7.231e-09	0.0207969	5.11e-08	913	FALSE	1
	cg26266427-chr6:32590070:SNP	cg26266427	Body	NM_019105	TNXB	Island	chr6	32063838	chr6:32590070:SNP	rs9271541	526232	-0.281677	0.0116871	2.41e-128	19811	C	A	0.2321	0.0219	TRUE	25	+++?+?++?++?++?+++++?+++????++?+++++	44.7	43.3822	0.008993	0.00282	-0.283435	0.0166403	4.669e-65	0.0211255	1.478e-40	913	FALSE	1
	cg26266427-chr6:32390332:SNP	cg26266427	Body	NM_019105	TNXB	Island	chr6	32063838	chr6:32390332:SNP	rs2894255	326494	-0.312479	0.0147257	0	17633	T	C	0.1586	0.0253	TRUE	25	---?----?--?--?-----?-?-????--?-----	22.2	30.8371	0.1585	0.0015676	-0.313118	0.0172437	1.102e-73	0.0189207	2.85e-61	913	FALSE	1
	cg26266427-chr6:32131972:SNP	cg26266427	Body	NM_019105	TNXB	Island	chr6	32063838	chr6:32131972:SNP	rs3132941	68134	-0.421301	0.0148177	8.09e-178	19882	C	G	0.1278	0.0186	TRUE	25	---??---?--?--?-----?---????--?-----	40.9	40.6335	0.01827	0.003895	-0.427137	0.0205515	6.07e-96	0.0250873	2.729e-63	913	FALSE	1
	cg26266427-chr6:32591368:SNP	cg26266427	Body	NM_019105	TNXB	Island	chr6	32063838	chr6:32591368:SNP	rs28383320	527530	0.252819	0.0163314	4.694e-54	16130	C	T	0.1405	0.0232	TRUE	20	---?---??-??--?-----??-?????-???----	32.4	28.0954	0.08161	0.0026255	0.248153	0.0210818	5.509e-32	0.0241493	1.199e-25	913	FALSE	1
	cg26266427-chr6:31332256:SNP	cg26266427	Body	NM_019105	TNXB	Island	chr6	32063838	chr6:31332256:SNP	rs2853997	731582	-0.228377	0.0115771	0	21452	A	C	0.2248	0.0277	TRUE	28	---?-------?--?-----?----???--?-----	38.7	44.0482	0.02044	0.0024236	-0.23296	0.0157542	1.773e-49	0.0188871	1.169e-33	913	FALSE	1
	cg26266427-chr6:32579775:SNP	cg26266427	Body	NM_019105	TNXB	Island	chr6	32063838	chr6:32579775:SNP	rs112040173	515937	0.186171	0.009143	3.63e-92	23993	T	A	0.4473	0.0211	TRUE	29	---?----?--?---------?---???------+-	43.1	49.2381	0.007856	0.0018671	0.182699	0.0127549	1.553e-46	0.0160781	5.252e-31	913	FALSE	1
	cg26266427-chr6:32017522:SNP	cg26266427	Body	NM_019105	TNXB	Island	chr6	32063838	chr6:32017522:SNP	rs182953657	46316	0.492092	0.031636	1.476e-54	20047	A	G	0.0265	0.0066	TRUE	26	++++?+?++++?++?+-+++?+++????++?+++++	0	24.6799	0.4804	0	0.492092	0.031636	1.476e-54	0.031636	1.476e-54	913	FALSE	1
	cg26266427-chr6:31239855:SNP	cg26266427	Body	NM_019105	TNXB	Island	chr6	32063838	chr6:31239855:SNP	rs7767581	823983	-0.180189	0.010471	2.301e-66	20109	C	G	0.3371	0.0316	TRUE	26	---?-------?--?-----?---????--?-?---	0	24.2526	0.5048	0	-0.180189	0.010471	2.301e-66	0.010471	2.301e-66	913	FALSE	1
	cg26266427-chr6:32586246:SNP	cg26266427	Body	NM_019105	TNXB	Island	chr6	32063838	chr6:32586246:SNP	rs28383274	522408	0.265493	0.0156357	1.156e-64	16888	G	A	0.1461	0.0254	TRUE	21	---?----?-??--?-----??--????????----	30.8	28.9156	0.08943	0.0023449	0.260197	0.0198251	2.381e-39	0.0226057	7.539e-32	913	FALSE	1
	cg26266427-chr6:31249398:SNP	cg26266427	Body	NM_019105	TNXB	Island	chr6	32063838	chr6:31249398:SNP	rs9264764	814440	0.127904	0.0100998	9.36e-37	20406	C	T	0.3974	0.018	TRUE	26	---?----?--?--?-+---?---????--?---+-	0	24.2604	0.5044	0	0.127904	0.0100998	9.36e-37	0.0100998	9.36e-37	913	FALSE	1
	cg26266427-chr6:32756292:SNP	cg26266427	Body	NM_019105	TNXB	Island	chr6	32063838	chr6:32756292:SNP	rs13197727	692454	0.226346	0.0186299	5.765e-34	21453	G	A	0.0767	0.0145	TRUE	28	---?-------?--?-+---?----???--?---+-	31.1	39.1818	0.06099	0.0044726	0.211424	0.0235764	3.031e-19	0.0270352	5.653e-17	913	FALSE	1
	cg26266427-chr6:30977680:SNP	cg26266427	Body	NM_019105	TNXB	Island	chr6	32063838	chr6:30977680:SNP	rs1634721		-0.231987	0.0160877	3.866e-47	16787	A	G	0.1397	0.0294	FALSE	24	---?--?----?--?-----?-?+?????-?---+-	34.8	35.2557	0.04905	0.0033892	-0.223233	0.0212647	8.839e-26	0.0246601	5.087e-21	913	FALSE	1
	cg26266427-chr6:32280182:SNP	cg26266427	Body	NM_019105	TNXB	Island	chr6	32063838	chr6:32280182:SNP	rs6939410	216344	-0.206238	0.0126429	8.027e-60	17651	G	A	0.2302	0.022	TRUE	25	+++?++++?++?++?-++++?+?++????+?+++++	14.9	28.1959	0.2519	0.0007089	-0.206397	0.0140211	4.76e-49	0.0148532	7.799e-44	913	FALSE	1
	cg26266427-chr6:32768980:SNP	cg26266427	Body	NM_019105	TNXB	Island	chr6	32063838	chr6:32768980:SNP	rs2621366	705142	0.116123	0.0102219	6.599e-30	21918	A	C	0.3163	0.0359	TRUE	29	++++++++-++?++?+++++?+++-???++?+++++	22.8	36.2605	0.1361	0.0009109	0.114536	0.0121171	3.309e-21	0.0132376	1.751e-18	913	FALSE	1
	cg26266427-chr6:32211085:SNP	cg26266427	Body	NM_019105	TNXB	Island	chr6	32063838	chr6:32211085:SNP	rs412657	147247	-0.163803	0.0113346	2.449e-47	16326	G	T	0.3929	0.0373	TRUE	23	+++?++++?++?++?+++++?+?+?????+?+?+++	19.7	27.3857	0.1969	0.0007342	-0.163617	0.0129905	2.246e-36	0.0141094	3.686e-31	913	FALSE	1
	cg26266427-chr6:31304714:SNP	cg26266427	Body	NM_019105	TNXB	Island	chr6	32063838	chr6:31304714:SNP	rs28752953	759124	-0.124687	0.0111202	3.536e-29	16164	A	G	0.5214	0.0467	TRUE	21	---?--????-?--?-----??--????--??----	18.4	24.5077	0.2209	0.0006031	-0.124839	0.0128297	2.235e-22	0.0136265	5.679e-20	913	FALSE	1
	cg26266427-chr6:31835053:SNP	cg26266427	Body	NM_019105	TNXB	Island	chr6	32063838	chr6:31835053:SNP	rs35421785	228785	0.538604	0.0550587	0	10433	A	G	0.0147	0.0027	TRUE	15	?+?+-+?++?+?+??+-?+??+++???????????+	39.7	23.2061	0.057	0.0329071	0.51368	0.0788228	7.178e-11	0.0912639	3.6e-09	913	FALSE	1
	cg26266427-chr6:31323776:INDEL	cg26266427	Body	NM_019105	TNXB	Island	chr6	32063838	chr6:31323776:INDEL	chr6:31323776:INDEL	740062	-0.177744	0.0112949	8.481e-56	17117	D	I	0.3488	0.0405	TRUE	22	---??--?-?-?--?-----??--????--??----	19.4	26.0686	0.2038	0.0006973	-0.178617	0.0131449	4.7e-42	0.014021	7.937e-37	913	FALSE	1
	cg26266427-chr6:31086997:SNP	cg26266427	Body	NM_019105	TNXB	Island	chr6	32063838	chr6:31086997:SNP	rs3095325	976841	-0.146843	0.0092274	5.088e-57	24149	T	C	0.4016	0.0322	TRUE	30	-----------?--------?---????--------	14.9	34.089	0.236	0.0004551	-0.147564	0.0102776	9.505e-47	0.0108467	9.323e-42	913	FALSE	1
	cg26266427-chr6:32600470:SNP	cg26266427	Body	NM_019105	TNXB	Island	chr6	32063838	chr6:32600470:SNP	rs9272119	536632	-0.109999	0.0117036	0	14720	C	T	0.4862	0.0366	TRUE	21	+++?++++?++?++?-++++???+????+???-?-+	38.8	32.7025	0.03636	0.0018614	-0.108499	0.0156997	4.816e-12	0.0191368	9.027e-09	913	FALSE	1
	cg26266427-chr6:32565571:SNP	cg26266427	Body	NM_019105	TNXB	Island	chr6	32063838	chr6:32565571:SNP	rs28366367	501733	0.183394	0.0157392	2.24e-31	8807	A	T	0.3711	0.0478	TRUE	14	+++?+?+?????++?-++??????????+???+?-+	60.2	32.6865	0.001899	0.0054722	0.175329	0.0269655	7.927e-11	0.0395739	3.583e-06	913	FALSE	1
	cg26266427-chr6:32769389:SNP	cg26266427	Body	NM_019105	TNXB	Island	chr6	32063838	chr6:32769389:SNP	rs2621363	705551	0.120321	0.0132279	9.371e-20	13429	G	T	0.3063	0.0207	TRUE	17	-??--??-+-??--?-?-???--?+???-???-?--	22.1	20.5379	0.197	0.0008837	0.116703	0.0158909	2.073e-13	0.0169796	1.378e-12	913	FALSE	1
	cg26266427-chr6:32429245:SNP	cg26266427	Body	NM_019105	TNXB	Island	chr6	32063838	chr6:32429245:SNP	rs9268846	365407	0.164964	0.0105168	0	20386	G	C	0.3428	0.0437	TRUE	26	---?----?--?--?-----?---????--?---+-	16.9	30.1006	0.2205	0.0005975	0.164978	0.011912	1.276e-43	0.0126625	8.508e-39	913	FALSE	1
	cg26266427-chr6:31457604:SNP	cg26266427	Body	NM_019105	TNXB	Island	chr6	32063838	chr6:31457604:SNP	rs3130917	606234	-0.119186	0.0098019	5.11e-34	21405	G	A	0.413	0.0368	TRUE	27	+++?+++?+++?++++++++?+++????-+?+++++	49.3	51.3243	0.002177	0.0025774	-0.126032	0.0146063	6.211e-18	0.0193491	7.285e-10	913	FALSE	1
	cg26266427-chr6:31297022:SNP	cg26266427	Body	NM_019105	TNXB	Island	chr6	32063838	chr6:31297022:SNP	rs74882063	766816	-0.113698	0.0113127	0	16643	T	C	0.3837	0.042	TRUE	21	---?---???-?--?---?-??--????-??---+-	37.2	31.8653	0.04475	0.0016439	-0.118055	0.015226	8.937e-15	0.0180241	2.824e-10	913	FALSE	1
	cg26266427-chr6:31325092:SNP	cg26266427	Body	NM_019105	TNXB	Island	chr6	32063838	chr6:31325092:SNP	rs9266217	738746	-0.148104	0.0105418	0	19811	A	G	0.3403	0.0339	TRUE	25	---?+--?+--?--?-----??--????--?-----	37.1	38.1745	0.03327	0.0016793	-0.144277	0.0140816	1.236e-24	0.0167678	1.022e-18	913	FALSE	1
	cg26266427-chr6:32395835:SNP	cg26266427	Body	NM_019105	TNXB	Island	chr6	32063838	chr6:32395835:SNP	rs3129844	331997	-0.155274	0.0117913	1.33e-39	17168	G	A	0.3099	0.0347	TRUE	24	+++?++++?++?++?+++++?+?+?????+?+++++	41.5	39.3066	0.01836	0.0024027	-0.154969	0.0161525	8.464e-22	0.020151	1.303e-14	913	FALSE	1
	cg26266427-chr6:31935284:INDEL	cg26266427	Body	NM_019105	TNXB	Island	chr6	32063838	chr6:31935284:INDEL	chr6:31935284:INDEL	128554	0.443155	0.014318	2.48e-210	21169	D	I	0.1331	0.0243	TRUE	27	+++++++?+?+?++++++++?+++????+++?++++	53.7	56.1227	0.0005442	0.0065342	0.434921	0.022308	1.182e-84	0.0309064	1.255e-46	913	FALSE	1
	cg26266427-chr6:32585068:SNP	cg26266427	Body	NM_019105	TNXB	Island	chr6	32063838	chr6:32585068:SNP	rs28752534	521230	0.193246	0.014512	0	10353	C	T	0.3508	0.0374	TRUE	16	---?---?????--?---?-????????-???-?--	39.5	24.7991	0.05271	0.0022601	0.193398	0.0196469	7.299e-23	0.0239923	7.982e-16	913	FALSE	1
	cg26266427-chr6:32602336:SNP	cg26266427	Body	NM_019105	TNXB	Island	chr6	32063838	chr6:32602336:SNP	rs9272222	538498	-0.24651	0.0153282	0	10437	A	G	0.2682	0.0244	TRUE	13	?--???-???-??-??----??-??????????---	3.8	12.4741	0.4084	0.0001287	-0.246859	0.0158681	1.428e-54	0.0159338	5.452e-54	913	FALSE	1
	cg26266427-chr6:32580366:SNP	cg26266427	Body	NM_019105	TNXB	Island	chr6	32063838	chr6:32580366:SNP	rs2858860	516528	0.188139	0.0095319	1.021e-86	22021	T	G	0.4482	0.0194	TRUE	26	+++?+++??++?+++++++++?++????+++?++-+	43.4	44.1359	0.01047	0.0018405	0.185395	0.0133747	1.081e-43	0.016828	5.101e-29	913	FALSE	1
	cg26266427-chr6:31092547:SNP	cg26266427	Body	NM_019105	TNXB	Island	chr6	32063838	chr6:31092547:SNP	rs3094202	971291	0.131217	0.0095063	0	23324	G	A	0.4021	0.0334	TRUE	29	-------?---?--------?---????------+-	9.7	30.9906	0.3175	0.0002845	0.131761	0.0101982	3.473e-38	0.0105216	1.073e-35	913	FALSE	1
	cg26266427-chr6:32284340:SNP	cg26266427	Body	NM_019105	TNXB	Island	chr6	32063838	chr6:32284340:SNP	rs9268220	220502	-0.212539	0.0136463	1.08e-54	17662	T	C	0.1889	0.0214	TRUE	25	---?+---?--?--?-----?-?--????-?-----	22.4	30.9209	0.1561	0.0013634	-0.21296	0.0160181	2.475e-40	0.0175815	1.211e-33	913	FALSE	1
	cg26266427-chr6:32580571:SNP	cg26266427	Body	NM_019105	TNXB	Island	chr6	32063838	chr6:32580571:SNP	rs80243928	516733	-0.222915	0.0113723	0	18589	T	C	0.2866	0.0319	TRUE	23	---?---??--?--?-----??--????-??-----	45.7	40.4968	0.009453	0.002564	-0.225029	0.01642	9.539e-43	0.0209337	1.769e-26	913	FALSE	1
	cg26266427-chr6:32588193:SNP	cg26266427	Body	NM_019105	TNXB	Island	chr6	32063838	chr6:32588193:SNP	rs9271438	524355	0.137835	0.011347	5.931e-34	18620	G	A	0.3202	0.054	TRUE	23	---?----?--?--?-----??--????-???--+-	23.4	28.7177	0.1531	0.0009257	0.13578	0.0135623	1.356e-23	0.0148119	1.33e-20	913	FALSE	1
	cg26266427-chr6:31840021:SNP	cg26266427	Body	NM_019105	TNXB	Island	chr6	32063838	chr6:31840021:SNP	rs2763981	223817	-0.211785	0.0102337	3.85e-95	22328	T	A	0.3077	0.0367	TRUE	28	++++++?++++?+++++++??+++????++++++-+	4	28.1148	0.4051	0.0001236	-0.211671	0.0105571	2.01e-89	0.0106563	6.798e-88	913	FALSE	1
	cg26266427-chr6:31727897:SNP	cg26266427	Body	NM_019105	TNXB	Island	chr6	32063838	chr6:31727897:SNP	rs3115672	335941	-0.429771	0.0137721	8.88e-214	24150	T	C	0.1247	0.0197	TRUE	30	-----------?--------?---????--------	24.7	38.5234	0.1111	0.0019043	-0.431614	0.0166609	5.72e-148	0.0182948	4.99e-122	913	FALSE	1
	cg26266427-chr6:31337703:SNP	cg26266427	Body	NM_019105	TNXB	Island	chr6	32063838	chr6:31337703:SNP	rs2844566	726135	-0.171368	0.0102293	5.414e-63	20443	A	T	0.3565	0.0365	TRUE	26	---??------?--?-----?---????--?-----	39.8	41.4981	0.02034	0.0018337	-0.175549	0.0139793	3.6e-36	0.0169798	5.967e-24	913	FALSE	1
	cg26266427-chr6:30234931:SNP	cg26266427	Body	NM_019105	TNXB	Island	chr6	32063838	chr6:30234931:SNP	rs3129706		-0.15139	0.0142146	0	17571	C	T	0.1653	0.0218	FALSE	25	+++?++++?++?++?+++++?-?-????++?+++-+	28.4	33.5294	0.09339	0.0020384	-0.144278	0.0175093	1.721e-16	0.0198587	2.471e-14	913	FALSE	1
	cg26266427-chr6:31917557:INDEL	cg26266427	Body	NM_019105	TNXB	Island	chr6	32063838	chr6:31917557:INDEL	chr6:31917557:INDEL	146281	0.349137	0.0169629	3.95e-94	21169	I	D	0.0954	0.0181	TRUE	27	-------?-?-?----+---?---????---?----	38.3	42.1164	0.02388	0.0049037	0.345502	0.0227435	4.042e-52	0.0274776	5.458e-37	913	FALSE	1
	cg26266427-chr6:31839612:SNP	cg26266427	Body	NM_019105	TNXB	Island	chr6	32063838	chr6:31839612:SNP	rs148659263	224226	0.544359	0.0550532	4.699e-23	10433	T	C	0.0147	0.0027	TRUE	15	?+?+-+?++?+?+??+-?+??+++???????????+	45.6	25.7228	0.02807	0.0418908	0.517992	0.0831299	4.631e-10	0.101152	7.382e-08	913	FALSE	1
	cg26266427-chr6:32780156:SNP	cg26266427	Body	NM_019105	TNXB	Island	chr6	32063838	chr6:32780156:SNP	rs9276807	716318	-0.171409	0.0096559	1.671e-70	23782	A	G	0.3303	0.0281	TRUE	30	------?----?--------?----???--------	33.6	43.6678	0.03945	0.0014388	-0.171531	0.012449	3.424e-43	0.0145397	4.447e-32	913	FALSE	1
	cg26266427-chr6:32587973:SNP	cg26266427	Body	NM_019105	TNXB	Island	chr6	32063838	chr6:32587973:SNP	rs9271426	524135	0.142357	0.0115228	4.618e-35	17446	A	G	0.3283	0.038	TRUE	22	+++?++++?+??++?+++++??++????+???++-+	24	27.6299	0.151	0.0009453	0.140772	0.0138502	2.873e-24	0.0151607	6.01e-21	913	FALSE	1
	cg26266427-chr6:31242817:SNP	cg26266427	Body	NM_019105	TNXB	Island	chr6	32063838	chr6:31242817:SNP	rs6930376	821021	-0.107961	0.0102723	7.781e-26	18791	T	A	0.4848	0.03	TRUE	24	+++?+++??+-?++?+++++?-++????++?+?+-+	45.2	41.9822	0.009122	0.0021409	-0.112107	0.0147968	3.552e-14	0.0187503	8.52e-09	913	FALSE	1
	cg26266427-chr6:32282019:SNP	cg26266427	Body	NM_019105	TNXB	Island	chr6	32063838	chr6:32282019:SNP	rs6903871	218181	-0.192957	0.0124222	2.065e-54	17658	C	A	0.2425	0.0232	TRUE	25	+++?++++?++?++?-++++?+?++????+?+++++	21.1	30.4057	0.1717	0.0010448	-0.193097	0.0144098	6.017e-41	0.0157377	1.47e-34	913	FALSE	1
	cg26266427-chr6:31303953:INDEL	cg26266427	Body	NM_019105	TNXB	Island	chr6	32063838	chr6:31303953:INDEL	chr6:31303953:INDEL	759885	-0.14242	0.0108059	1.146e-39	17052	D	I	0.5105	0.0419	TRUE	22	---?---???-?--?-----??--????--??----	12.6	24.0156	0.2923	0.000379	-0.143229	0.0119031	2.386e-33	0.0123576	9.884e-31	913	FALSE	1
	cg26266427-chr6:31304711:SNP	cg26266427	Body	NM_019105	TNXB	Island	chr6	32063838	chr6:31304711:SNP	rs28752952	759127	-0.119842	0.0111168	4.27e-27	16166	A	T	0.5245	0.0462	TRUE	21	---?+-????-?--?-----??--????--??----	44.8	36.2006	0.01457	0.0021659	-0.119059	0.0159687	8.933e-14	0.0201218	2.588e-09	913	FALSE	1
	cg26266427-chr6:30758371:SNP	cg26266427	Body	NM_019105	TNXB	Island	chr6	32063838	chr6:30758371:SNP	rs3129980		-0.191857	0.015589	8.283e-35	16702	G	C	0.1428	0.0223	FALSE	24	+++??+++?++?++?+++++?+?-+???++?-?+++	45.7	42.3336	0.008299	0.0049954	-0.179403	0.0224655	1.397e-15	0.028693	2.285e-11	913	FALSE	1
	cg26266427-chr6:31305383:SNP	cg26266427	Body	NM_019105	TNXB	Island	chr6	32063838	chr6:31305383:SNP	rs28367821	758455	-0.145904	0.00995	1.1e-48	20035	C	T	0.5011	0.0369	TRUE	25	+++?++++?++?++?+++++??++????++?+++++	6.4	25.6366	0.3719	0.0001723	-0.1463	0.0104359	1.194e-44	0.0106285	6.935e-43	913	FALSE	1
	cg26266427-chr6:32626302:SNP	cg26266427	Body	NM_019105	TNXB	Island	chr6	32063838	chr6:32626302:SNP	rs9273364	562464	-0.171511	0.0128255	8.741e-41	14631	G	T	0.2971	0.0239	TRUE	20	+++?+?++?++?++?+++??????+???+??+++++	19.9	23.7254	0.2069	0.0008349	-0.172334	0.0148075	2.631e-31	0.0160153	9.218e-27	913	FALSE	1
	cg26266427-chr6:32561445:SNP	cg26266427	Body	NM_019105	TNXB	Island	chr6	32063838	chr6:32561445:SNP	rs9270593	497607	-0.115718	0.0135215	1.148e-17	11370	G	A	0.4091	0.0381	TRUE	15	+++?+?+??++?++?+?+??????????+???+?++	14.6	16.3883	0.2902	0.0004794	-0.115226	0.0149729	1.408e-14	0.0158282	2.655e-13	913	FALSE	1
	cg26266427-chr6:32680725:SNP	cg26266427	Body	NM_019105	TNXB	Island	chr6	32063838	chr6:32680725:SNP	rs17219302	616887	0.156865	0.0123138	3.593e-37	17415	C	T	0.2561	0.046	TRUE	25	---?----?--?-+?-----?-?--???--??----	39.2	39.4544	0.02446	0.002473	0.152806	0.0163938	1.153e-20	0.0202431	9.258e-15	913	FALSE	1
	cg26266427-chr6:32586631:SNP	cg26266427	Body	NM_019105	TNXB	Island	chr6	32063838	chr6:32586631:SNP	rs28383301	522793	0.267817	0.0148635	1.395e-72	18672	T	C	0.1461	0.0257	TRUE	24	+++?++++++??++?++++++?++????+???++++	18.7	28.2934	0.2049	0.0012464	0.264709	0.0171029	4.932e-54	0.0182843	1.4e-48	913	FALSE	1
	cg26266427-chr6:31800535:INDEL	cg26266427	Body	NM_019105	TNXB	Island	chr6	32063838	chr6:31800535:INDEL	chr6:31800535:INDEL	263303	-0.194374	0.0159519	3.736e-34	10490	D	I	0.2691	0.0404	TRUE	14	?--??-????-??-??---???--?????-???---	44.9	23.5806	0.03521	0.0030841	-0.208033	0.0234336	6.833e-19	0.028935	1.847e-11	913	FALSE	1
	cg26266427-chr6:32652929:SNP	cg26266427	Body	NM_019105	TNXB	Island	chr6	32063838	chr6:32652929:SNP	rs9275164	589091	0.11845	0.0137441	6.799e-18	14330	C	T	0.2436	0.0138	TRUE	21	---?---???+?-+?-----???-????--??--+-	44.8	36.2387	0.01442	0.0032777	0.115157	0.0193989	2.916e-09	0.0249034	1.971e-06	913	FALSE	1
	cg26266427-chr6:31924327:SNP	cg26266427	Body	NM_019105	TNXB	Island	chr6	32063838	chr6:31924327:SNP	rs9501161	139511	0.224473	0.0157461	4.125e-46	23664	A	G	0.0956	0.0246	TRUE	29	++++++-++++?++++++++?+++?????++++++-	26.9	38.279	0.09324	0.0026992	0.221177	0.019458	6.111e-30	0.0215266	1.853e-25	913	FALSE	1
	cg26266427-chr6:32231483:SNP	cg26266427	Body	NM_019105	TNXB	Island	chr6	32063838	chr6:32231483:SNP	rs3130331	167645	-0.199786	0.0126352	2.576e-56	17646	T	C	0.2314	0.0216	TRUE	25	---?----?--?--?+----?-?-????--?-----	3.6	24.8877	0.4119	0.0001498	-0.199675	0.0129471	1.157e-53	0.0131025	1.7e-52	913	FALSE	1
	cg26266427-chr6:32605326:SNP	cg26266427	Body	NM_019105	TNXB	Island	chr6	32063838	chr6:32605326:SNP	rs28383346	541488	0.249043	0.0211783	6.32e-32	9364	G	A	0.1448	0.0253	TRUE	14	-???---?????--?-?---????????-???-?+-	39.4	21.4501	0.06449	0.0042413	0.241802	0.0289587	6.832e-17	0.0349443	1.027e-12	913	FALSE	1
	cg26266427-chr6:31947086:SNP	cg26266427	Body	NM_019105	TNXB	Island	chr6	32063838	chr6:31947086:SNP	rs391165	116752	0.439929	0.013343	2.13e-238	24146	A	G	0.1333	0.0227	TRUE	30	+++++++++++?++++++++?+++????++++++++	47.2	54.9567	0.002507	0.0048539	0.434011	0.0193686	3.29e-111	0.0252858	8.502e-68	913	FALSE	1
	cg26266427-chr6:32396475:SNP	cg26266427	Body	NM_019105	TNXB	Island	chr6	32063838	chr6:32396475:SNP	rs3129846	332637	-0.153253	0.011619	1.004e-39	17658	G	A	0.3113	0.0344	TRUE	25	+++?++++?++?++?+++++?+?++????+?+++++	41.5	41.0165	0.01659	0.0024286	-0.153407	0.015902	5.063e-22	0.0198571	1.184e-14	913	FALSE	1
	cg26266427-chr6:32605197:SNP	cg26266427	Body	NM_019105	TNXB	Island	chr6	32063838	chr6:32605197:SNP	rs3207966	541359	-0.239093	0.017553	2.996e-42	8839	A	G	0.2401	0.021	TRUE	14	---?-?-?????--?---??????????-???-?--	54	28.2629	0.008316	0.0052338	-0.233822	0.0275958	2.389e-17	0.0381615	3.721e-10	913	FALSE	1
	cg26266427-chr6:31304613:SNP	cg26266427	Body	NM_019105	TNXB	Island	chr6	32063838	chr6:31304613:SNP	rs28752948	759225	-0.14308	0.0101394	3.236e-45	19264	G	A	0.5097	0.0385	TRUE	24	+++?++++?++?++?+++++??++????++??++++	9	25.2771	0.3362	0.0002498	-0.143559	0.0108516	5.943e-40	0.0111432	9.778e-38	913	FALSE	1
	cg26266427-chr6:32440276:SNP	cg26266427	Body	NM_019105	TNXB	Island	chr6	32063838	chr6:32440276:SNP	rs9366801	376438	0.152371	0.0135575	2.628e-29	12756	T	C	0.3217	0.0473	TRUE	17	?++??++???+??+??++++??+++????+???+-+	22.9	20.7491	0.1884	0.0009604	0.150012	0.0161974	2.016e-20	0.0175816	4.457e-18	913	FALSE	1
	cg26266427-chr6:32224828:SNP	cg26266427	Body	NM_019105	TNXB	Island	chr6	32063838	chr6:32224828:SNP	rs9268013	160990	-0.201736	0.0127932	5.084e-56	17140	C	G	0.2322	0.0205	TRUE	24	---??---?--?--?+----?-?-????--?-----	0	21.9028	0.5261	0	-0.201736	0.0127932	5.084e-56	0.0127932	5.084e-56	913	FALSE	1
	cg26266427-chr6:30278745:SNP	cg26266427	Body	NM_019105	TNXB	Island	chr6	32063838	chr6:30278745:SNP	rs3094066		-0.197439	0.016114	0	17575	T	C	0.1278	0.0208	FALSE	25	---?----?--?--?-----?+?+????--?---+-	23.9	31.5249	0.1392	0.002073	-0.191178	0.0192637	3.266e-23	0.0211663	1.079e-20	913	FALSE	1
	cg26266427-chr6:32605356:SNP	cg26266427	Body	NM_019105	TNXB	Island	chr6	32063838	chr6:32605356:SNP	rs9272437	541518	-0.230198	0.0168529	1.779e-42	8853	G	A	0.2651	0.026	TRUE	12	+???+?+??+??++?+?+??????????+???+?++	28.3	15.3376	0.1676	0.0013954	-0.228496	0.020863	6.487e-28	0.0234985	1.168e-22	913	FALSE	1
	cg26266427-chr6:32602760:SNP	cg26266427	Body	NM_019105	TNXB	Island	chr6	32063838	chr6:32602760:SNP	rs80095283	538922	-0.347494	0.018164	1.397e-81	11968	C	A	0.1452	0.0152	TRUE	17	+++?+?++?+??++?+++?+????????+???+?++	35.4	24.7505	0.07435	0.0031479	-0.345444	0.0238246	1.221e-47	0.0280981	3.935e-35	913	FALSE	1
	cg26266427-chr6:32338400:SNP	cg26266427	Body	NM_019105	TNXB	Island	chr6	32063838	chr6:32338400:SNP	rs3117111	274562	0.1383	0.0127282	0	17169	C	T	0.2384	0.0297	TRUE	24	---?----?--?--?-----?-?-?????-?----+	17.3	27.8022	0.2234	0.0008234	0.13638	0.0143372	1.865e-21	0.0153857	2.498e-19	913	FALSE	1
	cg26266427-chr6:31306779:SNP	cg26266427	Body	NM_019105	TNXB	Island	chr6	32063838	chr6:31306779:SNP	rs375326	757059	-0.167317	0.0109828	2.089e-52	17040	G	A	0.3932	0.0228	TRUE	22	+++?+++???+?++?+++++??++????++??++++	23.9	27.603	0.1518	0.0008569	-0.167183	0.0131883	7.969e-37	0.0144362	4.623e-31	913	FALSE	1
	cg26266427-chr6:32570400:SNP	cg26266427	Body	NM_019105	TNXB	Island	chr6	32063838	chr6:32570400:SNP	rs2516049	506562	0.154735	0.0107557	6.304e-47	20952	C	T	0.3031	0.048	TRUE	25	---?---?---?---------?-?????---?-?+-	21.7	30.65	0.1641	0.000817	0.152642	0.0126384	1.386e-33	0.0137359	1.954e-29	913	FALSE	1
	cg26266427-chr6:31304604:SNP	cg26266427	Body	NM_019105	TNXB	Island	chr6	32063838	chr6:31304604:SNP	rs28752947	759234	-0.142996	0.0101369	3.465e-45	19265	G	A	0.5098	0.0386	TRUE	24	+++?++++?++?++?+++++??++????++??++++	7.6	24.899	0.3555	0.0002082	-0.143387	0.0107382	1.138e-40	0.0109738	8.195e-39	913	FALSE	1
	cg26266427-chr6:31082304:SNP	cg26266427	Body	NM_019105	TNXB	Island	chr6	32063838	chr6:31082304:SNP	rs3130554	981534	-0.146714	0.0090367	2.83e-59	24150	G	T	0.4767	0.0272	TRUE	30	+++++++++++?++++++++?+++????++++++++	0	28.7845	0.4763	0	-0.146714	0.0090367	2.83e-59	0.0090367	2.83e-59	913	FALSE	1
	cg26266427-chr6:30312176:SNP	cg26266427	Body	NM_019105	TNXB	Island	chr6	32063838	chr6:30312176:SNP	rs3132650		-0.151341	0.0146393	4.743e-25	16716	G	A	0.1641	0.0228	FALSE	24	+++?++?+?++?++?+++++?-?-????++?+++-+	26.1	31.1351	0.1195	0.0018526	-0.144664	0.0177595	3.771e-16	0.0198172	2.226e-14	913	FALSE	1
	cg26266427-chr6:32756480:SNP	cg26266427	Body	NM_019105	TNXB	Island	chr6	32063838	chr6:32756480:SNP	rs13197975	692642	0.22647	0.0186341	5.494e-34	21453	G	A	0.0767	0.0144	TRUE	28	---?-------?--?-+---?----???--?---+-	30.9	39.0698	0.06244	0.0044336	0.211611	0.0235448	2.527e-19	0.0269641	4.505e-17	913	FALSE	1
	cg26266427-chr6:30327952:SNP	cg26266427	Body	NM_019105	TNXB	Island	chr6	32063838	chr6:30327952:SNP	rs3094622		-0.193769	0.0160148	1.064e-33	17092	G	A	0.1307	0.0192	FALSE	24	+++?-+++?++?++?+++++?+?-?????+?+++-+	38.5	37.3746	0.02969	0.0039206	-0.181581	0.0216305	4.673e-17	0.0260238	9.632e-14	913	FALSE	1
	cg26266427-chr6:32437747:SNP	cg26266427	Body	NM_019105	TNXB	Island	chr6	32063838	chr6:32437747:SNP	rs199565194	373909	-0.182215	0.0165825	4.345e-28	9279	C	T	0.2713	0.0343	TRUE	15	?++??++???+??+??++++???++????????+++	30.4	20.1164	0.1265	0.0018443	-0.184018	0.0206595	5.235e-19	0.0238271	2.051e-14	913	FALSE	1
	cg26266427-chr6:32743488:SNP	cg26266427	Body	NM_019105	TNXB	Island	chr6	32063838	chr6:32743488:SNP	rs28724892	679650	0.116918	0.0110273	2.899e-26	17982	A	G	0.3497	0.0375	TRUE	24	+++?+++?-?-?++?+++++?+++????++??++++	26.9	31.4736	0.1116	0.0011027	0.117996	0.013562	3.305e-18	0.0150899	9.33e-15	913	FALSE	1
	cg26266427-chr6:31464798:SNP	cg26266427	Body	NM_019105	TNXB	Island	chr6	32063838	chr6:31464798:SNP	rs2534675	599040	-0.192084	0.0096543	4.392e-88	24633	T	C	0.3166	0.0219	TRUE	31	-----------?--------?----???--------	34.6	45.887	0.03185	0.0015544	-0.194136	0.0125363	4.319e-54	0.014767	1.106e-38	913	FALSE	1
	cg26266427-chr6:32584099:SNP	cg26266427	Body	NM_019105	TNXB	Island	chr6	32063838	chr6:32584099:SNP	rs28383231	520261	-0.198437	0.0117027	1.72e-64	14687	C	T	0.4319	0.0331	TRUE	21	+++?++++?+??++?+++++???+????+???++++	6.4	21.3721	0.3755	0.000201	-0.198253	0.0122376	5.01e-59	0.0125055	1.056e-56	913	FALSE	1
	cg26266427-chr6:31092049:SNP	cg26266427	Body	NM_019105	TNXB	Island	chr6	32063838	chr6:31092049:SNP	rs3095307	971789	-0.104422	0.0091213	0	24141	G	C	0.518	0.0244	TRUE	30	-+++-++++++?++++++++?+++????++++++-+	68.7	92.6124	1.435e-08	0.0055608	-0.112689	0.0171732	5.313e-11	0.0291291	0.0003373	913	FALSE	1
	cg26266427-chr6:32661515:SNP	cg26266427	Body	NM_019105	TNXB	Island	chr6	32063838	chr6:32661515:SNP	rs2647008	597677	0.247581	0.0172232	7.444e-47	18144	C	A	0.1087	0.0226	TRUE	26	---?----?--?--?-----?-?--???--?---+-	18.5	30.6742	0.2	0.0017803	0.24463	0.0196816	1.81e-35	0.0211323	1.059e-31	913	FALSE	1
	cg26266427-chr6:31276760:SNP	cg26266427	Body	NM_019105	TNXB	Island	chr6	32063838	chr6:31276760:SNP	rs1005598	787078	-0.132421	0.0106785	2.59e-35	17308	T	C	0.4453	0.0464	TRUE	22	---?---???-?--?-----??--?????-?-----	34.3	31.9576	0.05913	0.0013457	-0.136148	0.0139748	1.989e-22	0.0162504	3.677e-16	913	FALSE	1
	cg26266427-chr6:31352265:SNP	cg26266427	Body	NM_019105	TNXB	Island	chr6	32063838	chr6:31352265:SNP	rs28752478	711573	0.212011	0.0180536	7.631e-32	20901	G	C	0.0917	0.03	TRUE	27	---?----?--?--?-----?----???--?-----	12.4	29.6835	0.2809	0.0012672	0.211319	0.0197469	1.003e-26	0.0206113	8.134e-25	913	FALSE	1
	cg26266427-chr6:32416467:SNP	cg26266427	Body	NM_019105	TNXB	Island	chr6	32063838	chr6:32416467:SNP	rs7762077	352629	-0.225635	0.0140405	4.122e-58	15837	A	G	0.2021	0.0211	TRUE	23	---?----?--?--?--?--?-?-????--??----	35.4	34.074	0.04828	0.0025283	-0.224387	0.0182374	8.65e-35	0.0217462	3.194e-25	913	FALSE	1
	cg26266427-chr6:32565650:SNP	cg26266427	Body	NM_019105	TNXB	Island	chr6	32063838	chr6:32565650:SNP	rs9270637	501812	-0.219501	0.016485	0	8827	G	A	0.2903	0.0256	TRUE	14	+++?+?+?????++?+++??????????+???+?++	62.3	34.4831	0.001016	0.0065142	-0.21802	0.0287346	3.265e-14	0.0437271	5.172e-07	913	FALSE	1
	cg26266427-chr6:32599039:SNP	cg26266427	Body	NM_019105	TNXB	Island	chr6	32063838	chr6:32599039:SNP	rs77465153	535201	-0.261672	0.0204597	1.874e-37	6555	A	G	0.2345	0.0306	TRUE	11	?--???-???-??-??----??????????????--	36.8	15.8303	0.1046	0.0027782	-0.264149	0.0270992	1.891e-22	0.0323883	6.519e-16	913	FALSE	1
	cg26266427-chr6:31329589:INDEL	cg26266427	Body	NM_019105	TNXB	Island	chr6	32063838	chr6:31329589:INDEL	chr6:31329589:INDEL	734249	-0.203723	0.0166229	0	10682	I	D	0.2128	0.016	TRUE	14	?++??+????+??+??++++??++?????????+++	27.7	17.9904	0.1579	0.0015792	-0.206833	0.0210673	9.444e-23	0.0230041	8.296e-19	913	FALSE	1
	cg26266427-chr6:32750504:SNP	cg26266427	Body	NM_019105	TNXB	Island	chr6	32063838	chr6:32750504:SNP	rs28893554	686666	0.225768	0.0185995	6.612e-34	21456	T	C	0.0769	0.0143	TRUE	28	+++?+++++++?++?+-+++?++++???++?+++-+	29.4	38.2581	0.07387	0.00412	0.21174	0.0232286	7.831e-20	0.0263549	1.067e-17	913	FALSE	1
	cg26266427-chr6:31247758:SNP	cg26266427	Body	NM_019105	TNXB	Island	chr6	32063838	chr6:31247758:SNP	rs2853944	816080	-0.178158	0.0104094	1.144e-65	20958	T	C	0.32	0.0322	TRUE	27	---?-------?--?-----?---????--?-----	1.6	26.4225	0.4401	4.86e-05	-0.178152	0.0105418	4.533e-64	0.0105785	1.212e-63	913	FALSE	1
	cg26266427-chr6:32649388:SNP	cg26266427	Body	NM_019105	TNXB	Island	chr6	32063838	chr6:32649388:SNP	rs9275104	585550	0.127054	0.0127614	2.371e-23	17051	C	T	0.2368	0.0166	TRUE	24	---?----?-+?--?-----???--???--??--+-	38.2	37.2045	0.03095	0.0024493	0.124282	0.0169285	2.111e-13	0.0206427	7.511e-10	913	FALSE	1
	cg26266427-chr6:32264179:SNP	cg26266427	Body	NM_019105	TNXB	Island	chr6	32063838	chr6:32264179:SNP	rs9268153	200341	-0.209187	0.0140335	2.997e-50	17168	T	C	0.1872	0.0273	TRUE	24	---?+---?--?--?-----?-?-?????-?-----	20	28.7534	0.1886	0.001203	-0.208471	0.0162203	8.324e-38	0.0175439	8.91e-33	913	FALSE	1
	cg26266427-chr6:32637180:SNP	cg26266427	Body	NM_019105	TNXB	Island	chr6	32063838	chr6:32637180:SNP	rs9274700	573342	0.148375	0.0140911	6.3e-26	12430	G	A	0.283	0.016	TRUE	19	---?---?????--?-----???-????-???--+-	30.9	26.051	0.0986	0.0017244	0.145345	0.0177061	2.235e-16	0.0203937	3.45e-13	913	FALSE	1
	cg26266427-chr6:32638371:SNP	cg26266427	Body	NM_019105	TNXB	Island	chr6	32063838	chr6:32638371:SNP	rs9274761	574533	0.121914	0.0154828	0	10917	G	A	0.2536	0.0155	TRUE	17	---?-?-?????-+?-----????????-??--?+-	19.1	19.7846	0.2301	0.0009881	0.116932	0.0177667	4.656e-11	0.0191451	1.916e-10	913	FALSE	1
	cg26266427-chr6:32776583:SNP	cg26266427	Body	NM_019105	TNXB	Island	chr6	32063838	chr6:32776583:SNP	rs2621338	712745	0.119332	0.0097942	0	24156	A	G	0.3095	0.034	TRUE	30	++++++++-++?++++++++?+++-????+++++++	28	40.3015	0.07913	0.0011402	0.117944	0.0120689	1.477e-22	0.0136111	1.83e-18	913	FALSE	1
	cg26266427-chr6:32130329:SNP	cg26266427	Body	NM_019105	TNXB	Island	chr6	32063838	chr6:32130329:SNP	rs34129552	66491	0.400184	0.0339488	4.509e-32	15504	G	C	0.0308	0.0099	TRUE	21	---??-?----?--?-----?-?-?????-??--?-	30.8	28.9042	0.08966	0.0108978	0.399823	0.0418624	1.286e-21	0.0490632	3.449e-16	913	FALSE	1
	cg26266427-chr6:31331095:SNP	cg26266427	Body	NM_019105	TNXB	Island	chr6	32063838	chr6:31331095:SNP	rs2250399	732743	-0.226329	0.0117049	2.66e-83	20960	A	G	0.2255	0.0276	TRUE	27	---?-------?--?-----?---????--?-----	42.5	45.1999	0.01119	0.0027959	-0.230009	0.0164872	3.11e-44	0.0203484	9.734e-29	913	FALSE	1
	cg26266427-chr6:32428715:SNP	cg26266427	Body	NM_019105	TNXB	Island	chr6	32063838	chr6:32428715:SNP	rs9268838	364877	0.137923	0.0109171	0	20405	A	G	0.2978	0.0346	TRUE	26	+++?++++?++?++?+++++?++++????+?+++-+	4.3	26.1109	0.4017	0.0001403	0.13748	0.0112658	2.984e-34	0.0114023	1.107e-33	913	FALSE	1
	cg26266427-chr6:32446010:SNP	cg26266427	Body	NM_019105	TNXB	Island	chr6	32063838	chr6:32446010:SNP	rs17209873	382172	0.135995	0.0121196	3.214e-29	13591	C	T	0.4635	0.0362	TRUE	20	---?---???-?--?-----???-????-???----	18.1	23.2068	0.2284	0.0006631	0.136405	0.013781	4.246e-23	0.014803	4.041e-20	913	FALSE	1
	cg26266427-chr6:32568150:SNP	cg26266427	Body	NM_019105	TNXB	Island	chr6	32063838	chr6:32568150:SNP	rs9270739	504312	-0.196171	0.0146319	5.496e-41	10286	T	C	0.3404	0.0311	TRUE	15	---?-?-??-??--?---??????????-???-?--	45.3	25.6072	0.02903	0.0027457	-0.192288	0.0210589	6.789e-20	0.0267629	2.302e-13	913	FALSE	1
	cg26266427-chr6:32585701:SNP	cg26266427	Body	NM_019105	TNXB	Island	chr6	32063838	chr6:32585701:SNP	rs28383258	521863	0.26318	0.0165509	0	15729	T	A	0.1423	0.0289	TRUE	21	---?---?-???--?-----??--????-???----	22.4	25.7613	0.1738	0.0017048	0.259265	0.0196974	1.445e-39	0.0213186	5.179e-35	913	FALSE	1
	cg26266427-chr6:32588299:SNP	cg26266427	Body	NM_019105	TNXB	Island	chr6	32063838	chr6:32588299:SNP	rs9271445	524461	0.180982	0.0146433	0	10181	T	A	0.3762	0.0388	TRUE	16	---?-?-?????--?-----????????-???-?+-	26.1	20.3066	0.1605	0.0012514	0.180881	0.017831	3.517e-24	0.0198237	6.876e-20	913	FALSE	1
	cg26266427-chr6:32584525:SNP	cg26266427	Body	NM_019105	TNXB	Island	chr6	32063838	chr6:32584525:SNP	rs28383247	520687	0.263943	0.0151377	4.392e-68	18116	A	G	0.1457	0.0259	TRUE	23	+++?++++?+??++?++++++?++????+???++++	30.2	31.519	0.08597	0.0023314	0.260034	0.0190728	2.521e-42	0.0216875	4.477e-34	913	FALSE	1
	cg26266427-chr6:30746519:SNP	cg26266427	Body	NM_019105	TNXB	Island	chr6	32063838	chr6:30746519:SNP	rs3130673		-0.191276	0.0156487	2.338e-34	16724	T	G	0.1416	0.0244	FALSE	24	---?----?--?--?-----?-?+-????-?+?---	46.1	42.6497	0.007619	0.00512	-0.178953	0.0227046	3.227e-15	0.0290179	4.349e-11	913	FALSE	1
	cg26266427-chr6:32431962:SNP	cg26266427	Body	NM_019105	TNXB	Island	chr6	32063838	chr6:32431962:SNP	rs9268895	368124	-0.172102	0.0136099	1.188e-36	14315	G	A	0.2563	0.0316	TRUE	21	+++?-++???+?++?+++++???+????++??++++	43.3	35.282	0.01865	0.0030217	-0.169315	0.0189141	3.498e-19	0.0240093	7.602e-13	913	FALSE	1
	cg26266427-chr6:31319079:SNP	cg26266427	Body	NM_019105	TNXB	Island	chr6	32063838	chr6:31319079:SNP	rs73728881	744759	-0.171176	0.0109471	4.101e-55	17062	C	T	0.4113	0.0246	TRUE	22	+++?-++???+?++?+++++??++????++??++++	14.6	24.5832	0.2657	0.0004623	-0.170394	0.0122523	5.741e-44	0.0128151	1.072e-40	913	FALSE	1
	cg26266427-chr6:32586831:SNP	cg26266427	Body	NM_019105	TNXB	Island	chr6	32063838	chr6:32586831:SNP	rs13191810	522993	0.184428	0.0132973	9.68e-44	13215	T	C	0.3075	0.0266	TRUE	19	+++?++++?+??++?+++++???????????++?++	0	15.4608	0.6301	0	0.184428	0.0132973	9.68e-44	0.0132973	9.68e-44	913	FALSE	1
	cg26266427-chr6:31692970:SNP	cg26266427	Body	NM_019105	TNXB	Island	chr6	32063838	chr6:31692970:SNP	rs407283	370868	0.422849	0.0431083	1.03e-22	16027	A	G	0.0218	0.0125	TRUE	21	++++++++++??++?+?+?+?+??+????+?+++??	0	16.0215	0.7153	0	0.422849	0.0431083	1.03e-22	0.0431083	1.03e-22	913	FALSE	1
	cg26266427-chr6:31315049:SNP	cg26266427	Body	NM_019105	TNXB	Island	chr6	32063838	chr6:31315049:SNP	rs28380921	748789	-0.139242	0.0127575	9.822e-28	12265	A	T	0.4467	0.0489	TRUE	16	?--??--???-??-??----??--?????-???---	10.1	16.6778	0.3385	0.0003042	-0.140273	0.0138455	4.013e-24	0.0141844	9.556e-23	913	FALSE	1
	cg26266427-chr6:31327504:SNP	cg26266427	Body	NM_019105	TNXB	Island	chr6	32063838	chr6:31327504:SNP	rs2523585	736334	-0.14258	0.01092	5.815e-39	18356	T	C	0.3443	0.0358	TRUE	24	---?+--?+?-?--?-----??--????--?-----	39.3	37.8896	0.02617	0.0018994	-0.138168	0.0148682	1.502e-20	0.0179894	2.267e-15	913	FALSE	1
	cg26266427-chr6:31276777:SNP	cg26266427	Body	NM_019105	TNXB	Island	chr6	32063838	chr6:31276777:SNP	rs1634791	787061	-0.132295	0.0106784	2.997e-35	17308	A	G	0.4452	0.0465	TRUE	22	---?---???-?--?-----??--?????-?-----	34.3	31.9807	0.05881	0.0013485	-0.135985	0.0139802	2.314e-22	0.0162621	4.112e-16	913	FALSE	1
	cg26266427-chr6:32772975:SNP	cg26266427	Body	NM_019105	TNXB	Island	chr6	32063838	chr6:32772975:SNP	rs9276758	709137	-0.170952	0.0096526	3.48e-70	23782	A	G	0.3302	0.0279	TRUE	30	------?----?--------?----???--------	33.7	43.763	0.03864	0.0014471	-0.171028	0.0124591	6.975e-43	0.0145664	8.33e-32	913	FALSE	1
	cg26266427-chr6:32565533:SNP	cg26266427	Body	NM_019105	TNXB	Island	chr6	32063838	chr6:32565533:SNP	rs9270632	501695	-0.203211	0.0158512	1.268e-37	8844	A	G	0.3285	0.0287	TRUE	14	---?-?-?????--?---??????????-???-?--	56.5	29.8779	0.004904	0.004731	-0.200254	0.0257085	6.731e-15	0.0364307	2.433e-08	913	FALSE	1
	cg26266427-chr6:32589751:SNP	cg26266427	Body	NM_019105	TNXB	Island	chr6	32063838	chr6:32589751:SNP	rs9271519	525913	0.150104	0.0126747	2.343e-32	14585	C	T	0.3226	0.0404	TRUE	19	---?-?-?????--?-----??--????-???--+-	19.4	22.3375	0.2173	0.0007605	0.148007	0.0147901	1.418e-23	0.0157289	1.385e-21	913	FALSE	1
	cg26266427-chr6:32584024:SNP	cg26266427	Body	NM_019105	TNXB	Island	chr6	32063838	chr6:32584024:SNP	rs28383229	520186	0.254623	0.0151743	3.425e-63	18722	G	A	0.1391	0.0235	TRUE	24	---?------??--?------?--????-???----	23.4	30.0448	0.1481	0.0017299	0.251991	0.0181301	6.419e-44	0.0198222	9.129e-38	913	FALSE	1
	cg26266427-chr6:31303464:SNP	cg26266427	Body	NM_019105	TNXB	Island	chr6	32063838	chr6:31303464:SNP	rs28367791	760374	0.120207	0.0119582	8.98e-24	14083	C	G	0.4753	0.0492	TRUE	18	+++?++????+?++?+++????++????+???++++	0	16.579	0.4832	0	0.120207	0.0119582	8.98e-24	0.0119582	8.98e-24	913	FALSE	1
	cg26266427-chr6:31096526:SNP	cg26266427	Body	NM_019105	TNXB	Island	chr6	32063838	chr6:31096526:SNP	rs9263717	967312	0.145203	0.0115996	5.954e-36	24141	G	A	0.1971	0.0415	TRUE	30	-----------?--------?---????------+-	0.1	29.0353	0.4632	5e-06	0.145201	0.0116098	6.854e-36	0.0116137	7.21e-36	913	FALSE	1
	cg26266427-chr6:31929014:SNP	cg26266427	Body	NM_019105	TNXB	Island	chr6	32063838	chr6:31929014:SNP	rs437179	134824	-0.217772	0.0100599	6.41e-104	23295	A	C	0.3055	0.0402	TRUE	29	------?----?--------?----????-------	1.8	28.5095	0.4377	5.44e-05	-0.217671	0.0102002	4.85e-101	0.010243	2.63e-100	913	FALSE	1
	cg26266427-chr6:32749726:INDEL	cg26266427	Body	NM_019105	TNXB	Island	chr6	32063838	chr6:32749726:INDEL	chr6:32749726:INDEL	685888	0.238337	0.0203753	1.315e-31	17984	D	I	0.0772	0.0142	TRUE	24	+++?+++?+?+?++?+-+++?+++????++??++-+	26.8	31.406	0.1131	0.0037357	0.225282	0.0250308	2.253e-19	0.027822	1.067e-17	913	FALSE	1
	cg26266427-chr6:31309050:SNP	cg26266427	Body	NM_019105	TNXB	Island	chr6	32063838	chr6:31309050:SNP	rs28367845	754788	-0.133547	0.0108527	8.472e-35	16938	C	T	0.5166	0.0393	TRUE	22	+++?++?+??+?++?+++++??++????++??++++	10.7	23.5046	0.3177	0.0003176	-0.133872	0.0117887	6.929e-30	0.012147	4.076e-28	913	FALSE	1
	cg26266427-chr6:32252507:SNP	cg26266427	Body	NM_019105	TNXB	Island	chr6	32063838	chr6:32252507:SNP	rs9268124	188669	-0.207525	0.0135779	9.764e-53	17652	G	A	0.1901	0.0207	TRUE	25	+++?-+++?++?++?+++++?+?+????++?+++++	14.7	28.1525	0.2537	0.0008094	-0.207166	0.0150532	4.299e-43	0.0159271	8.294e-39	913	FALSE	1
	cg26266427-chr3:109052934:SNP	cg26266427	Body	NM_019105	TNXB	Island	chr6	32063838	chr3:109052934:SNP	rs7642495		-0.119818	0.008377	2.088e-46	26517	A	G	0.4644	0.0267	FALSE	34	-----------?----+--------?----------	13.6	38.188	0.2454	0.0003801	-0.118484	0.0092357	1.13e-37	0.0096939	4.295e-35	913	FALSE	1
	cg26266427-chr6:31306784:SNP	cg26266427	Body	NM_019105	TNXB	Island	chr6	32063838	chr6:31306784:SNP	rs28752999	757054	-0.140767	0.0108169	0	17038	G	A	0.5225	0.0444	TRUE	22	+++?+++???+?++?+++++??++????++??++++	11.4	23.6932	0.3082	0.000339	-0.140917	0.0118015	7.273e-33	0.0122041	8.852e-31	913	FALSE	1
	cg26266427-chr6:31434366:SNP	cg26266427	Body	NM_019105	TNXB	Island	chr6	32063838	chr6:31434366:SNP	rs3094013	629472	-0.346567	0.0148113	4.39e-121	19925	A	G	0.1342	0.0229	TRUE	25	---?----?--?--?-----?---?????-?-----	21.1	30.409	0.1716	0.0015051	-0.348695	0.0175354	5.463e-88	0.0187665	3.782e-76	913	FALSE	1
	cg26266427-chr6:32584952:SNP	cg26266427	Body	NM_019105	TNXB	Island	chr6	32063838	chr6:32584952:SNP	rs685810	521114	0.135207	0.0106073	3.256e-37	20141	G	A	0.3351	0.0392	TRUE	26	---?------??--?------?--????--?---+-	0	19.7777	0.7584	0	0.135207	0.0106073	3.256e-37	0.0106073	3.256e-37	913	FALSE	1
	cg26266427-chr6:32591654:SNP	cg26266427	Body	NM_019105	TNXB	Island	chr6	32063838	chr6:32591654:SNP	rs9271612	527816	-0.27874	0.0122707	3.12e-114	18213	G	A	0.2291	0.0206	TRUE	22	+++?+?++?++?++?+++++??+?????++??++++	49.1	41.2599	0.005206	0.0032821	-0.27951	0.0183302	1.682e-52	0.024109	6.443e-31	913	FALSE	1
	cg26266427-chr6:31724219:SNP	cg26266427	Body	NM_019105	TNXB	Island	chr6	32063838	chr6:31724219:SNP	rs805826	339619	0.174918	0.0105487	9.41e-62	24117	C	G	0.2532	0.0425	TRUE	30	++++-++++++?++++++++?+++????++++++++	44.4	52.1138	0.005294	0.0027048	0.175295	0.0149133	6.709e-32	0.0189563	2.772e-20	913	FALSE	1
	cg26266427-chr6:32783337:SNP	cg26266427	Body	NM_019105	TNXB	Island	chr6	32063838	chr6:32783337:SNP	rs2856995	719499	0.10169	0.0091191	7.057e-29	24635	A	T	0.419	0.0417	TRUE	31	++++++++-++?++++++++?++++???+++-++++	12.2	34.1876	0.2734	0.0003656	0.101358	0.0099767	3.008e-24	0.010392	1.301e-22	913	FALSE	1
	cg26266427-chr6:32107161:SNP	cg26266427	Body	NM_019105	TNXB	Island	chr6	32063838	chr6:32107161:SNP	rs1141512	43323	0.2508	0.0164856	2.887e-52	20964	C	T	0.0985	0.0169	TRUE	27	---?-------?--?-----?---????--?-----	16.6	31.1577	0.2224	0.0014803	0.250499	0.0185857	2.106e-41	0.0197558	6.305e-37	913	FALSE	1
	cg26266427-chr6:32089142:SNP	cg26266427	Body	NM_019105	TNXB	Island	chr6	32063838	chr6:32089142:SNP	rs204888	25304	0.604617	0.0178083	0.00000000000000000000000000000000000000000000000000000000000000000000000000000000000000000000000000000000000000000000000000000000000000000000000000000000000000000000000000000000000000000000000000000000000000000000000000000000000000000000000000000000000116	20941	T	G	0.0817	0.0175	TRUE	27	+++++++++++?++?+++++?+++?????+?+++++	42.7	45.3792	0.01069	0.0065061	0.602207	0.0247931	2.54e-130	0.0310818	2.781e-84	913	FALSE	1
	cg26266427-chr6:32302382:SNP	cg26266427	Body	NM_019105	TNXB	Island	chr6	32063838	chr6:32302382:SNP	rs1265757	238544	-0.41088	0.0164746	2.73e-137	16790	T	C	0.1257	0.0195	TRUE	24	---?--?-?--?--?-----?-?-????--?-----	39.8	38.2256	0.02409	0.0043869	-0.413985	0.0223881	2.426e-76	0.0273806	6.679e-51	913	FALSE	1
	cg26266427-chr6:31239270:INDEL	cg26266427	Body	NM_019105	TNXB	Island	chr6	32063838	chr6:31239270:INDEL	chr6:31239270:INDEL	824568	-0.182497	0.0133068	8.308e-43	12265	I	D	0.344	0.0238	TRUE	16	?++??++???+??+??++++??++?????+???+++	0	13.1403	0.5915	0	-0.182497	0.0133068	8.308e-43	0.0133068	8.308e-43	913	FALSE	1
	cg26266427-chr6:32014828:SNP	cg26266427	Body	NM_019105	TNXB	Island	chr6	32063838	chr6:32014828:SNP	rs433061	49010	-0.448169	0.0141336	1.15e-220	23274	A	G	0.121	0.0191	TRUE	29	------?----?--------?---????--------	38.5	45.5633	0.01933	0.0037119	-0.453348	0.0192641	1.86e-122	0.022999	1.431e-84	913	FALSE	1
	cg26266427-chr6:32383223:SNP	cg26266427	Body	NM_019105	TNXB	Island	chr6	32063838	chr6:32383223:SNP	rs9268530	319385	-0.237651	0.0138543	5.905e-66	17169	C	T	0.186	0.0209	TRUE	24	+++?++++?++?++?+++++?+?+?????+?+++++	45	41.8301	0.009501	0.0038289	-0.241528	0.0196355	8.996e-35	0.0251967	4.031e-21	913	FALSE	1
	cg26266427-chr6:32431105:SNP	cg26266427	Body	NM_019105	TNXB	Island	chr6	32063838	chr6:32431105:SNP	rs7747521	367267	-0.18797	0.0121235	3.229e-54	17655	G	A	0.265	0.0324	TRUE	25	+++?++++?++?++?+++++?+?+????++?+++++	34.3	36.5412	0.04859	0.0019456	-0.187571	0.0155384	1.496e-33	0.0184586	2.354e-24	913	FALSE	1
	cg26266427-chr6:31654533:SNP	cg26266427	Body	NM_019105	TNXB	Island	chr6	32063838	chr6:31654533:SNP	rs79515906	409305	0.340831	0.0356896	0	19723	T	C	0.0272	0.0169	TRUE	24	+-++++++++??++?+?+++?++-+????+?+++??	32.3	33.987	0.06535	0.014732	0.342199	0.0443909	1.27e-14	0.0527383	1.029e-10	913	FALSE	1
	cg26266427-chr6:32141005:SNP	cg26266427	Body	NM_019105	TNXB	Island	chr6	32063838	chr6:32141005:SNP	rs3131297	77167	-0.132253	0.0118454	6.055e-29	20967	T	A	0.2181	0.0304	TRUE	27	+++?+++++++?++?-++++?+++????++?+++++	6.1	27.6789	0.3744	0.00025	-0.132042	0.012417	2.071e-26	0.0126103	9.842e-26	913	FALSE	1
	cg26266427-chr6:31472162:SNP	cg26266427	Body	NM_019105	TNXB	Island	chr6	32063838	chr6:31472162:SNP	rs3020831	591676	-0.192217	0.009658	0	24635	T	G	0.3166	0.0219	TRUE	31	-----------?--------?----???--------	33.9	45.3713	0.03564	0.0015051	-0.194216	0.012464	9.62e-55	0.0146065	1.498e-39	913	FALSE	1
	cg26266427-chr6:32268080:SNP	cg26266427	Body	NM_019105	TNXB	Island	chr6	32063838	chr6:32268080:SNP	rs7750783	204242	-0.203574	0.0128282	1.034e-56	17651	T	C	0.2276	0.0306	TRUE	25	---?----?--?--?+----?-?--????-?-----	14.5	28.0863	0.2564	0.0007116	-0.203441	0.0142168	1.899e-46	0.0150123	6.872e-42	913	FALSE	1
	cg26266427-chr6:31074129:SNP	cg26266427	Body	NM_019105	TNXB	Island	chr6	32063838	chr6:31074129:SNP	rs2517484	989709	-0.149916	0.0094402	8.633e-57	24631	A	G	0.3435	0.0247	TRUE	31	-----------?---+----?----???------+-	40.6	50.488	0.01103	0.0019184	-0.149676	0.0129096	4.414e-31	0.0158872	3.863e-21	913	FALSE	1
	cg26266427-chr6:31307961:SNP	cg26266427	Body	NM_019105	TNXB	Island	chr6	32063838	chr6:31307961:SNP	rs28753052	755877	-0.141289	0.0109478	4.178e-38	16572	A	G	0.5019	0.0388	TRUE	21	---??--???-?--?-----??--????--??----	18.3	24.4819	0.222	0.00058	-0.14228	0.0125941	1.353e-29	0.0134012	5.468e-26	913	FALSE	1
	cg26266427-chr6:31236524:SNP	cg26266427	Body	NM_019105	TNXB	Island	chr6	32063838	chr6:31236524:SNP	rs9264587	827314	-0.173949	0.0117141	7.004e-50	15930	A	G	0.3404	0.0279	TRUE	21	---?--??-?-?--?-----??--????--???---	25.6	26.8682	0.139	0.0010233	-0.173457	0.0143705	1.514e-33	0.0157368	2.106e-28	913	FALSE	1
	cg26266427-chr6:32581614:SNP	cg26266427	Body	NM_019105	TNXB	Island	chr6	32063838	chr6:32581614:SNP	rs9271301	517776	-0.223947	0.0111402	6.99e-90	19347	T	C	0.2857	0.0316	TRUE	24	---?----?--?--?-----??--????-??-----	44	41.05	0.01169	0.0023916	-0.226042	0.0157829	1.595e-46	0.0198828	1.99e-29	913	FALSE	1
	cg26266427-chr6:31884909:SNP	cg26266427	Body	NM_019105	TNXB	Island	chr6	32063838	chr6:31884909:SNP	rs62395855	178929	0.47665	0.0312628	1.735e-52	21047	T	C	0.0264	0.0069	TRUE	28	++++++?++++?++?+-+++?++++???++?+++++	1.5	27.3999	0.4424	0.0004136	0.476598	0.0316221	2.488e-51	0.0317258	5.109e-51	913	FALSE	1
	cg26266427-chr6:32311459:SNP	cg26266427	Body	NM_019105	TNXB	Island	chr6	32063838	chr6:32311459:SNP	rs3132954	247621	-0.183185	0.0109679	1.271e-62	17166	A	G	0.4211	0.0457	TRUE	24	---?----?--?--?-----?-?-?????-?-----	37.4	36.7602	0.03444	0.001753	-0.183893	0.0144559	4.526e-37	0.0175297	1.466e-25	913	FALSE	1
	cg26266427-chr6:32754869:SNP	cg26266427	Body	NM_019105	TNXB	Island	chr6	32063838	chr6:32754869:SNP	rs28986403	691031	0.225768	0.0185995	0	21456	A	G	0.0769	0.0143	TRUE	28	+++?+++++++?++?+-+++?++++???++?+++-+	29.4	38.2581	0.07387	0.00412	0.21174	0.0232286	7.831e-20	0.0263549	1.067e-17	913	FALSE	1
	cg26266427-chr6:32710510:SNP	cg26266427	Body	NM_019105	TNXB	Island	chr6	32063838	chr6:32710510:SNP	rs28371353	646672	0.208973	0.0212377	7.593e-23	18717	G	C	0.0686	0.0163	TRUE	24	---?----?-??--?-----?---?????-?----+	21.4	29.2792	0.1712	0.0030134	0.203357	0.0248848	3.035e-16	0.0270358	1.08e-14	913	FALSE	1
	cg26266427-chr6:32442167:SNP	cg26266427	Body	NM_019105	TNXB	Island	chr6	32063838	chr6:32442167:SNP	rs6901665	378329	-0.216517	0.0181633	9.25e-33	8787	G	C	0.2289	0.0382	TRUE	14	?++??++???+??+??++++???+?????????+++	17.3	15.713	0.265	0.0009911	-0.2173	0.0205426	3.768e-26	0.0219538	6.061e-23	913	FALSE	1
	cg26266427-chr3:109051009:SNP	cg26266427	Body	NM_019105	TNXB	Island	chr6	32063838	chr3:109051009:SNP	rs6791602		0.197721	0.0094228	9.35e-98	25353	T	C	0.2855	0.0177	FALSE	32	+++++++++++?++++++++++++???+++++++++	7.4	33.4758	0.348	0.0002301	0.197669	0.0099367	4.693e-88	0.0101754	4.198e-84	913	FALSE	1
	cg26266427-chr6:32572311:SNP	cg26266427	Body	NM_019105	TNXB	Island	chr6	32063838	chr6:32572311:SNP	rs586610	508473	0.139632	0.011256	2.451e-35	18897	C	T	0.307	0.0461	TRUE	24	---?------??--?------?-?????-??---+-	3.3	23.7815	0.416	0.0001055	0.139304	0.0115383	1.463e-33	0.0116384	3.663e-33	913	FALSE	1
	cg26266427-chr6:32561392:SNP	cg26266427	Body	NM_019105	TNXB	Island	chr6	32063838	chr6:32561392:SNP	rs9270590	497554	-0.114707	0.0135207	2.18e-17	11355	A	G	0.4102	0.0391	TRUE	15	---?-?-??--?--?+?-??????????-???-?--	23.5	18.2922	0.1938	0.0008614	-0.113767	0.0159845	1.1e-12	0.017666	8.408e-11	913	FALSE	1
	cg26266427-chr6:32355683:SNP	cg26266427	Body	NM_019105	TNXB	Island	chr6	32063838	chr6:32355683:SNP	rs9268473	291845	0.152012	0.0107677	2.965e-45	17648	G	A	0.4401	0.0231	TRUE	25	---?----?--?--?-----?-?-????--?-----	0	14.4344	0.9362	0	0.152012	0.0107677	2.965e-45	0.0107677	2.965e-45	913	FALSE	1
	cg26266427-chr6:32599237:SNP	cg26266427	Body	NM_019105	TNXB	Island	chr6	32063838	chr6:32599237:SNP	rs9272060	535399	-0.275883	0.0139239	2.271e-87	14320	A	G	0.2277	0.0235	TRUE	20	---?-?--?--?--?-----????????-??--?--	43.3	33.5157	0.02095	0.003014	-0.274366	0.0193459	1.183e-45	0.0245616	2.83e-29	913	FALSE	1
	cg26266427-chr6:32325292:SNP	cg26266427	Body	NM_019105	TNXB	Island	chr6	32063838	chr6:32325292:SNP	rs3117113	261454	0.141509	0.0125566	1.853e-29	17652	A	C	0.2372	0.0306	TRUE	25	+++?++++?++?++?+++++?+?++????+?++++-	19.8	29.9342	0.1869	0.000988	0.139743	0.0144043	2.97e-22	0.0156614	1.632e-19	913	FALSE	1
	cg26266427-chr6:32589783:SNP	cg26266427	Body	NM_019105	TNXB	Island	chr6	32063838	chr6:32589783:SNP	rs9271521	525945	0.146972	0.0117555	7.24e-36	16822	T	C	0.3271	0.0391	TRUE	21	+++?+?++?+??++?+++++??++????+???++-+	19.2	24.7509	0.2111	0.0007081	0.145667	0.0136343	1.212e-26	0.0145479	5.379e-24	913	FALSE	1
	cg26266427-chr6:31069229:SNP	cg26266427	Body	NM_019105	TNXB	Island	chr6	32063838	chr6:31069229:SNP	rs9263557	994609	-0.139255	0.0108613	1.248e-37	18689	G	A	0.3369	0.0165	TRUE	25	+++?+++?+?+?++?-++++?+++????++?+-+-+	47.9	46.1057	0.004299	0.002785	-0.138348	0.016014	5.662e-18	0.0208654	2.49e-11	913	FALSE	1
	cg26266427-chr6:30699022:SNP	cg26266427	Body	NM_019105	TNXB	Island	chr6	32063838	chr6:30699022:SNP	rs3095327		-0.186956	0.015183	7.657e-35	17572	A	G	0.145	0.0233	FALSE	25	---?----?--?--?-----?-?+????--?---+-	34.8	36.7926	0.04589	0.0031283	-0.177132	0.0198357	4.263e-19	0.0232759	9.575e-16	913	FALSE	1
	cg26266427-chr6:32401532:SNP	cg26266427	Body	NM_019105	TNXB	Island	chr6	32063838	chr6:32401532:SNP	rs3129861	337694	-0.318428	0.0150611	3.24e-99	16790	A	T	0.1577	0.0233	TRUE	24	---?--?-?--?--?-----?-?-????--?-----	27.5	31.7184	0.1061	0.0020971	-0.31969	0.0184003	1.294e-67	0.0207702	4.747e-53	913	FALSE	1
	cg26266427-chr6:31659731:SNP	cg26266427	Body	NM_019105	TNXB	Island	chr6	32063838	chr6:31659731:SNP	rs805282	404107	0.151093	0.0110827	2.542e-42	20941	G	T	0.2679	0.0419	TRUE	27	-----------?--?-----?---?????-?-----	12.2	29.6269	0.2834	0.0004718	0.150915	0.0121433	1.844e-35	0.0126287	5.469e-33	913	FALSE	1
	cg26266427-chr6:32232981:SNP	cg26266427	Body	NM_019105	TNXB	Island	chr6	32063838	chr6:32232981:SNP	rs9268074	169143	-0.191352	0.0122529	5.588e-55	18130	C	T	0.2429	0.023	TRUE	26	+++?++++?++?++?-++++?+?++???++?+++++	20.6	31.4979	0.1731	0.0010288	-0.191383	0.0141633	1.318e-41	0.0154377	2.776e-35	913	FALSE	1
	cg26266427-chr6:31598293:SNP	cg26266427	Body	NM_019105	TNXB	Island	chr6	32063838	chr6:31598293:SNP	rs2736161	465545	0.377536	0.0299795	2.304e-36	19488	A	G	0.0332	0.0116	TRUE	25	+++?+-++++??++?+++++?++++????+?+++-?	11.3	27.0505	0.3021	0.0028945	0.373625	0.0323645	7.887e-31	0.03379	5.528e-29	913	FALSE	1
	cg26266427-chr6:32678131:SNP	cg26266427	Body	NM_019105	TNXB	Island	chr6	32063838	chr6:32678131:SNP	rs9275567	614293	-0.137102	0.0108988	0	16922	A	G	0.4317	0.0291	TRUE	24	---?----?--?-+?-----?-?-????--??----	43.1	40.4167	0.0138	0.0021896	-0.138443	0.0150918	4.583e-20	0.0191519	8.148e-13	913	FALSE	1
	cg26266427-chr6:32752006:SNP	cg26266427	Body	NM_019105	TNXB	Island	chr6	32063838	chr6:32752006:SNP	rs28986371	688168	0.225768	0.0185995	6.612e-34	21456	T	C	0.0769	0.0143	TRUE	28	+++?+++++++?++?+-+++?++++???++?+++-+	29.4	38.2581	0.07387	0.00412	0.21174	0.0232286	7.831e-20	0.0263549	1.067e-17	913	FALSE	1
	cg26266427-chr6:32192107:SNP	cg26266427	Body	NM_019105	TNXB	Island	chr6	32063838	chr6:32192107:SNP	rs3134929	128269	0.178618	0.0137185	9.382e-39	17116	G	C	0.1977	0.0333	TRUE	24	---??---?--?--?-----?-?-????--?-----	0	20.2096	0.6292	0	0.178618	0.0137185	9.382e-39	0.0137185	9.382e-39	913	FALSE	1
	cg26266427-chr6:31473561:SNP	cg26266427	Body	NM_019105	TNXB	Island	chr6	32063838	chr6:31473561:SNP	rs1065075	590277	-0.192171	0.009659	4.441e-88	24630	G	A	0.3165	0.022	TRUE	31	+++++++++++?++++++++?++++???++++++++	34.5	45.8297	0.03226	0.0015503	-0.194189	0.0125338	3.853e-54	0.0147556	8.982e-39	913	FALSE	1
	cg26266427-chr6:31450340:SNP	cg26266427	Body	NM_019105	TNXB	Island	chr6	32063838	chr6:31450340:SNP	rs2516508	613498	-0.162991	0.0104881	1.841e-54	20973	C	T	0.3106	0.0197	TRUE	27	+++?+++++++?++?+++++?++++????+?+++++	39.9	43.2507	0.01817	0.0020103	-0.167664	0.0142827	8.044e-32	0.0174468	9.436e-21	913	FALSE	1
	cg26266427-chr6:32611951:SNP	cg26266427	Body	NM_019105	TNXB	Island	chr6	32063838	chr6:32611951:SNP	rs9273039	548113	-0.235557	0.016898	0	8747	T	C	0.2676	0.0235	TRUE	12	-???-??-?-??--?-?-??????????-???-?--	46.6	20.5807	0.03798	0.0031054	-0.235974	0.024663	1.091e-21	0.0316157	9.29e-14	913	FALSE	1
	cg26266427-chr6:31066633:SNP	cg26266427	Body	NM_019105	TNXB	Island	chr6	32063838	chr6:31066633:SNP	rs144846110	997205	-0.285381	0.0180177	0	12265	G	A	0.1491	0.0235	TRUE	16	?++??++???+??+??++++??++?????+???+++	24.6	19.8825	0.1765	0.0017718	-0.288125	0.0220111	3.755e-39	0.0238824	6.538e-33	913	TRUE	1
	cg26266427-chr6:31746548:SNP	cg26266427	Body	NM_019105	TNXB	Island	chr6	32063838	chr6:31746548:SNP	rs909267	317290	0.240942	0.0194536	0	20531	C	T	0.0708	0.0151	TRUE	27	------?----?--?-----?---????+-?-----	7.5	28.1168	0.3527	0.0008473	0.241181	0.0205609	8.935e-32	0.0210374	2.271e-30	913	FALSE	1
	cg26266427-chr6:31343874:SNP	cg26266427	Body	NM_019105	TNXB	Island	chr6	32063838	chr6:31343874:SNP	rs2844549	719964	-0.178427	0.0103919	4.471e-66	19923	T	C	0.3551	0.0362	TRUE	25	---?----?--?--?-----?---?????-?-----	34.2	36.4586	0.04951	0.0014331	-0.182958	0.0135507	1.527e-41	0.0157865	1.275e-29	913	FALSE	1
	cg26266427-chr6:32680563:SNP	cg26266427	Body	NM_019105	TNXB	Island	chr6	32063838	chr6:32680563:SNP	rs28371348	616725	0.159655	0.0168999	3.484e-21	9508	A	G	0.2462	0.0403	TRUE	15	?++??++???+??-??++++???+?????+???+++	53.5	30.0873	0.007423	0.0050148	0.156633	0.0258629	1.393e-09	0.0363196	1.103e-05	913	FALSE	1
	cg26266427-chr6:32601249:SNP	cg26266427	Body	NM_019105	TNXB	Island	chr6	32063838	chr6:32601249:SNP	rs9272171	537411	-0.119162	0.0130322	6.037e-20	11954	G	A	0.4617	0.0389	TRUE	18	+++?+++???+?++?-++++????????+???-?++	46.4	31.7196	0.0163	0.0027092	-0.118171	0.0188039	3.291e-10	0.0243162	9.558e-07	913	FALSE	1
	cg26266427-chr6:31092541:SNP	cg26266427	Body	NM_019105	TNXB	Island	chr6	32063838	chr6:31092541:SNP	rs3094203	971297	0.130441	0.0098056	2.233e-40	21891	G	A	0.404	0.034	TRUE	28	-------?-?-?--------?---????------+-	13	31.0205	0.2703	0.000408	0.131334	0.0107839	4.036e-34	0.0112657	5.293e-31	913	FALSE	1
	cg26266427-chr6:31266090:SNP	cg26266427	Body	NM_019105	TNXB	Island	chr6	32063838	chr6:31266090:SNP	rs4406273	797748	0.215064	0.0176563	3.942e-34	19582	A	G	0.0899	0.0078	TRUE	24	+++?++++?++?++?+++++??++?????+?+-+-+	12.2	26.2079	0.2911	0.0010645	0.215615	0.0193052	5.796e-29	0.0201189	1.138e-26	913	FALSE	1
	cg26266427-chr6:31325886:SNP	cg26266427	Body	NM_019105	TNXB	Island	chr6	32063838	chr6:31325886:SNP	rs9266257	737952	-0.192699	0.0106758	7.874e-73	20076	G	C	0.3118	0.0291	TRUE	25	+++??++++++?++?+++++??++????++?+++++	0	22.7699	0.5334	0	-0.192699	0.0106758	7.874e-73	0.0106758	7.874e-73	913	FALSE	1
	cg26266427-chr6:30495860:SNP	cg26266427	Body	NM_019105	TNXB	Island	chr6	32063838	chr6:30495860:SNP	rs3094024		-0.199759	0.0160349	1.269e-35	17568	G	A	0.1332	0.0267	FALSE	25	+++?++++?++?++?+++++?+?-????++?+++-+	29.6	34.0953	0.08299	0.002759	-0.190987	0.0201624	2.735e-21	0.0227797	1.8e-18	913	FALSE	1
	cg26266427-chr6:31453577:SNP	cg26266427	Body	NM_019105	TNXB	Island	chr6	32063838	chr6:31453577:SNP	rs55912244	610261	0.15389	0.018806	2.767e-16	6561	T	C	0.6908	0.0274	TRUE	9	+???+?+?+???+??+?????+??????+???+???	25.8	10.7887	0.214	0.0011534	0.150084	0.0225441	2.788e-11	0.0253615	1.296e-09	913	FALSE	1
	cg26266427-chr6:31448533:SNP	cg26266427	Body	NM_019105	TNXB	Island	chr6	32063838	chr6:31448533:SNP	rs2248617	615305	-0.15942	0.0105966	3.759e-51	19639	T	C	0.3381	0.0176	TRUE	25	---?-------?--?-----?---?????-?-?---	40.9	40.5807	0.01851	0.0019845	-0.16327	0.014627	6.237e-29	0.0179175	5.714e-19	913	FALSE	1
	cg26266427-chr6:30227912:SNP	cg26266427	Body	NM_019105	TNXB	Island	chr6	32063838	chr6:30227912:SNP	rs9261628		-0.152458	0.0144195	3.972e-26	16856	T	C	0.1657	0.0214	FALSE	24	---?----?--?--?-----?+?+????--??--+-	28	31.9277	0.1017	0.0019707	-0.145745	0.0177198	1.952e-16	0.0200165	2.604e-14	913	FALSE	1
	cg26266427-chr6:32588260:SNP	cg26266427	Body	NM_019105	TNXB	Island	chr6	32063838	chr6:32588260:SNP	rs9271442	524422	0.174473	0.0131083	2.021e-40	12418	A	T	0.3869	0.028	TRUE	18	+++?+?++?+??++?+++++????????+???+?-+	25	22.6716	0.1603	0.001059	0.174673	0.0158023	2.105e-28	0.0174815	1.856e-23	913	FALSE	1
	cg26266427-chr6:31088202:SNP	cg26266427	Body	NM_019105	TNXB	Island	chr6	32063838	chr6:31088202:SNP	rs2302399	975636	0.146013	0.0097696	1.662e-50	24136	G	A	0.3267	0.0212	TRUE	30	-----------?--------?---????------+-	24.8	38.5664	0.1102	0.0009593	0.148069	0.0117147	1.278e-36	0.0129924	2.642e-29	913	FALSE	1
	cg26266427-chr6:32034922:INDEL	cg26266427	Body	NM_019105	TNXB	Island	chr6	32063838	chr6:32034922:INDEL	chr6:32034922:INDEL	28916	0.586853	0.0440797	1.933e-40	6177	D	I	0.0467	0.0143	TRUE	9	+??++???+???+??+?????+??????+???+???	60	20.0122	0.01029	0.0270914	0.58102	0.0719454	6.701e-16	0.110266	1.026e-07	913	FALSE	1
	cg26266427-chr6:32756030:SNP	cg26266427	Body	NM_019105	TNXB	Island	chr6	32063838	chr6:32756030:SNP	rs9276694	692192	0.112898	0.0104255	0	19193	T	C	0.3871	0.0298	TRUE	26	+++?-++?+?+?++?+-+++?++++???++?+++++	23.4	32.6309	0.1406	0.0008817	0.111022	0.0124438	4.583e-19	0.0136077	1.071e-16	913	FALSE	1
	cg26266427-chr6:32433192:SNP	cg26266427	Body	NM_019105	TNXB	Island	chr6	32063838	chr6:32433192:SNP	rs2395186	369354	0.152475	0.0105013	9.109e-48	20897	G	C	0.3312	0.0424	TRUE	27	---?----?--?--?-----?----???--?---+-	24.3	34.357	0.1263	0.0009746	0.151746	0.0125869	1.807e-33	0.0138767	4.374e-28	913	FALSE	1
	cg26266427-chr6:31272261:SNP	cg26266427	Body	NM_019105	TNXB	Island	chr6	32063838	chr6:31272261:SNP	rs6457374	791577	-0.189788	0.0108975	6.272e-68	20474	C	T	0.2864	0.0395	TRUE	26	+++?-++++++?++?+++++?+++?????+?+++++	0	21.9046	0.6412	0	-0.189788	0.0108975	6.272e-68	0.0108975	6.272e-68	913	FALSE	1
	cg26266427-chr6:31083286:SNP	cg26266427	Body	NM_019105	TNXB	Island	chr6	32063838	chr6:31083286:SNP	rs3094219	980552	-0.136944	0.0090755	1.903e-51	24639	G	A	0.5084	0.039	TRUE	31	+++++++++++?++++++++?++++???++++++-+	0	27.2529	0.61	0	-0.136944	0.0090755	1.903e-51	0.0090755	1.903e-51	913	FALSE	1
	cg26266427-chr6:31303757:SNP	cg26266427	Body	NM_019105	TNXB	Island	chr6	32063838	chr6:31303757:SNP	rs28752914	760081	-0.133634	0.0146329	6.696e-20	9332	G	A	0.5005	0.0425	TRUE	12	?++??+????+??+??++????++?????????+++	0	8.43674	0.6737	0	-0.133634	0.0146329	6.696e-20	0.0146329	6.696e-20	913	FALSE	1
	cg26266427-chr6:32204657:SNP	cg26266427	Body	NM_019105	TNXB	Island	chr6	32063838	chr6:32204657:SNP	rs3134925	140819	-0.278606	0.0143819	1.33e-83	17655	A	G	0.1617	0.0193	TRUE	25	---?----?--?--?-----?-?-????--?-----	36.2	37.6308	0.03781	0.0029793	-0.277925	0.0187947	1.767e-49	0.0225501	4.579e-35	913	FALSE	1
	cg26266427-chr6:31303536:SNP	cg26266427	Body	NM_019105	TNXB	Island	chr6	32063838	chr6:31303536:SNP	rs28752904	760302	-0.138847	0.0140093	3.725e-23	10203	A	G	0.5023	0.0463	TRUE	13	?--??--???-??-??--????--?????????---	9.6	13.2717	0.3496	0.0002884	-0.139884	0.0152415	4.398e-20	0.0154939	3.205e-19	913	FALSE	1
	cg26266427-chr6:31326618:SNP	cg26266427	Body	NM_019105	TNXB	Island	chr6	32063838	chr6:31326618:SNP	rs2523595	737220	-0.1297	0.0102158	6.217e-37	20677	G	A	0.3594	0.0327	TRUE	27	++++-+++-++?++?+++++?+++????++??+++-	38.9	42.5778	0.02139	0.0018371	-0.125651	0.0138762	1.364e-19	0.0167295	8.987e-15	913	FALSE	1
	cg26266427-chr6:32565213:SNP	cg26266427	Body	NM_019105	TNXB	Island	chr6	32063838	chr6:32565213:SNP	rs28366362	501375	0.194696	0.0137853	0	11029	C	T	0.3973	0.0296	TRUE	16	---?-?-??-??--?---??????????-??--?+-	44.1	26.8373	0.03009	0.0024766	0.192206	0.0196852	1.607e-22	0.024664	2.929e-15	913	FALSE	1
	cg26266427-chr6:32416983:SNP	cg26266427	Body	NM_019105	TNXB	Island	chr6	32063838	chr6:32416983:SNP	rs7748925	353145	-0.394182	0.0176847	0	15027	T	G	0.1238	0.0206	TRUE	22	---?---??--?--?--?--?-?-????--??----	34.7	32.163	0.05636	0.0037336	-0.397994	0.0230668	1.045e-66	0.0270854	5.565e-48	913	FALSE	1
	cg26266427-chr6:31303366:SNP	cg26266427	Body	NM_019105	TNXB	Island	chr6	32063838	chr6:31303366:SNP	rs28367786	760472	-0.12898	0.01456	8.107e-19	9339	G	C	0.4982	0.0388	TRUE	12	?++??+????+??+??++????++?????????+++	8.8	12.0676	0.3586	0.0002664	-0.130069	0.0157929	1.782e-16	0.015973	6.755e-16	913	FALSE	1
	cg26266427-chr6:32568964:SNP	cg26266427	Body	NM_019105	TNXB	Island	chr6	32063838	chr6:32568964:SNP	rs9270771	505126	-0.20463	0.0154234	3.572e-40	9246	T	G	0.3419	0.0287	TRUE	14	---???-?????--?---?-????????-???-?--	54.4	28.4964	0.007711	0.0041062	-0.197854	0.0244095	5.249e-16	0.0338086	1.425e-09	913	FALSE	1
	cg26266427-chr6:31303436:SNP	cg26266427	Body	NM_019105	TNXB	Island	chr6	32063838	chr6:31303436:SNP	rs28367788	760402	0.125028	0.012152	7.927e-25	14099	C	T	0.4166	0.0475	TRUE	18	---?--????-?--?---????--????-???----	0	15.5879	0.5532	0	0.125028	0.012152	7.927e-25	0.012152	7.927e-25	913	FALSE	1
	cg26266427-chr6:31676702:INDEL	cg26266427	Body	NM_019105	TNXB	Island	chr6	32063838	chr6:31676702:INDEL	chr6:31676702:INDEL	387136	0.226984	0.0162529	0	17581	I	D	0.1259	0.0196	TRUE	24	------??-?-?--?-----?---????+-??--+-	41.5	39.298	0.0184	0.0046158	0.219841	0.022647	2.808e-22	0.0277699	2.989e-16	913	FALSE	1
	cg26266427-chr6:32740895:SNP	cg26266427	Body	NM_019105	TNXB	Island	chr6	32063838	chr6:32740895:SNP	rs1480382	677057	-0.166157	0.0103992	1.822e-57	20120	T	C	0.3401	0.023	TRUE	26	---?-------?--?-----?----????-?-?---	29.7	35.5535	0.07865	0.0012109	-0.166922	0.0130085	1.088e-37	0.0147891	2.742e-29	913	FALSE	1
	cg26266427-chr6:31416360:SNP	cg26266427	Body	NM_019105	TNXB	Island	chr6	32063838	chr6:31416360:SNP	rs9267110	647478	-0.133647	0.0107005	0	19611	C	G	0.3223	0.0353	TRUE	25	---?---??--?--?-----?---????--?-----	12.1	27.3121	0.2901	0.0004038	-0.133631	0.0117339	4.771e-30	0.0121772	5.031e-28	913	FALSE	1
	cg26266427-chr6:32026212:INDEL	cg26266427	Body	NM_019105	TNXB	Island	chr6	32063838	chr6:32026212:INDEL	chr6:32026212:INDEL	37626	0.611305	0.0384585	0	17099	D	I	0.0224	0.0064	TRUE	23	++++++??+?+?++?+++++?+++?????+??++++	0	16.804	0.7741	0	0.611305	0.0384585	6.841e-57	0.0384585	6.841e-57	913	FALSE	1
	cg26266427-chr6:32226256:SNP	cg26266427	Body	NM_019105	TNXB	Island	chr6	32063838	chr6:32226256:SNP	rs142071717	162418	-0.198393	0.0126363	1.505e-55	17644	G	A	0.2311	0.0215	TRUE	25	+++?++++?++?++?-++++?+?+????++?+++++	2.2	24.5467	0.4307	9.23e-05	-0.198328	0.0128299	6.639e-54	0.0129241	3.509e-53	913	FALSE	1
	cg26266427-chr6:31337654:SNP	cg26266427	Body	NM_019105	TNXB	Island	chr6	32063838	chr6:31337654:SNP	rs2523530	726184	0.206463	0.0182333	1.005e-29	20898	G	A	0.0903	0.0314	TRUE	27	---?----?--?--?-----?----???--?-----	15.8	30.8925	0.2323	0.0017178	0.205727	0.0204675	9.055e-24	0.0216643	1.571e-21	913	FALSE	1
	cg26266427-chr6:31085356:SNP	cg26266427	Body	NM_019105	TNXB	Island	chr6	32063838	chr6:31085356:SNP	rs3130985	978482	-0.324602	0.0131618	2.71e-134	24149	T	C	0.1419	0.0237	TRUE	30	-----------?--------?---????--------	25	38.6596	0.1084	0.0017662	-0.32577	0.0159945	3.24e-92	0.0175459	2.058e-76	913	FALSE	1
	cg26266427-chr6:31933238:SNP	cg26266427	Body	NM_019105	TNXB	Island	chr6	32063838	chr6:31933238:SNP	rs62404828	130600	0.482382	0.0309475	8.913e-55	20557	G	T	0.0271	0.0067	TRUE	27	------?----?--?-+---?---????--?-----	2.7	26.7316	0.4235	0.0007433	0.482572	0.0316196	1.374e-52	0.0318184	6.462e-52	913	FALSE	1
	cg26266427-chr6:32608108:SNP	cg26266427	Body	NM_019105	TNXB	Island	chr6	32063838	chr6:32608108:SNP	rs28383405	544270	0.114516	0.0188988	0	6553	T	C	0.3212	0.0399	TRUE	10	+???+???????++?+?+??????????+???+?-+	4.1	9.38557	0.4025	0.0001645	0.113786	0.0195823	6.222e-09	0.0197084	6.228e-09	913	FALSE	1
	cg26266427-chr6:32445660:SNP	cg26266427	Body	NM_019105	TNXB	Island	chr6	32063838	chr6:32445660:SNP	rs9269149	381822	-0.179227	0.013416	1.047e-40	14333	C	T	0.2687	0.0361	TRUE	21	+++?+++???+?++?+++++???+????+??+++++	32.2	29.5088	0.07821	0.0018271	-0.176879	0.0169393	1.595e-25	0.0197945	1.373e-19	913	FALSE	1
	cg26266427-chr6:31647653:SNP	cg26266427	Body	NM_019105	TNXB	Island	chr6	32063838	chr6:31647653:SNP	rs805291	416185	0.358052	0.0292599	1.974e-34	19485	A	G	0.0349	0.0123	TRUE	25	+++?+-++++??++?+++++?++++????+?+++-?	15	28.2483	0.2497	0.0038363	0.352189	0.0323836	1.508e-27	0.0344393	2.569e-25	913	FALSE	1
	cg26266427-chr6:32124543:SNP	cg26266427	Body	NM_019105	TNXB	Island	chr6	32063838	chr6:32124543:SNP	rs432953	60705	0.3078	0.0180236	2.179e-65	20439	A	T	0.0842	0.0201	TRUE	26	+++??++++++?++?--+++?-++????++?+++-+	55.5	56.229	0.0003387	0.0107455	0.296889	0.0285633	2.639e-25	0.040538	3.129e-14	913	FALSE	1
	cg26266427-chr6:31307688:SNP	cg26266427	Body	NM_019105	TNXB	Island	chr6	32063838	chr6:31307688:SNP	rs28753035	756150	0.16755	0.0173193	3.882e-22	11882	C	G	0.1734	0.0278	TRUE	16	?++??+????+?++?+++++??++?????????+-+	18.2	18.3377	0.2453	0.0011153	0.167711	0.0200459	5.943e-17	0.0211731	2.506e-15	913	FALSE	1
	cg26266427-chr6:32223775:SNP	cg26266427	Body	NM_019105	TNXB	Island	chr6	32063838	chr6:32223775:SNP	rs6457514	159937	-0.186475	0.0124083	0	17652	G	A	0.2439	0.0223	TRUE	25	+++?++++?++?++?-++++?+?+????++?+++++	5.5	25.4078	0.3839	0.0002291	-0.186297	0.0128886	2.352e-47	0.0131361	9.754e-46	913	FALSE	1
	cg26266427-chr6:32753149:SNP	cg26266427	Body	NM_019105	TNXB	Island	chr6	32063838	chr6:32753149:SNP	rs28986387	689311	0.230499	0.0190206	8.442e-34	20717	T	C	0.0765	0.0148	TRUE	27	+++?+++++++?++?+-+++?++++???++??++-+	31	37.6975	0.06459	0.004489	0.215481	0.0240929	3.762e-19	0.0275781	6.376e-17	913	FALSE	1
	cg26266427-chr6:31535381:INDEL	cg26266427	Body	NM_019105	TNXB	Island	chr6	32063838	chr6:31535381:INDEL	chr6:31535381:INDEL	528457	0.121931	0.0129287	4.06e-21	12650	I	D	0.4091	0.0276	TRUE	16	?--??-????-??--?----??--?????-???---	0	14.7588	0.4689	0	0.121931	0.0129287	4.06e-21	0.0129287	4.06e-21	913	FALSE	1
	cg26266427-chr6:32451947:SNP	cg26266427	Body	NM_019105	TNXB	Island	chr6	32063838	chr6:32451947:SNP	rs71565334	388109	0.140318	0.0135638	4.409e-25	12685	T	C	0.3247	0.0465	TRUE	19	+++?+++???+??+?+++++???+????+???++-+	16.1	21.4466	0.2575	0.000685	0.139587	0.015247	5.434e-20	0.0161609	3.871e-18	913	FALSE	1
	cg26266427-chr6:32307532:SNP	cg26266427	Body	NM_019105	TNXB	Island	chr6	32063838	chr6:32307532:SNP	rs1033499	243694	-0.209416	0.0134383	9.423e-55	18141	A	G	0.189	0.0214	TRUE	26	---?+---?--?--?-----?-?--???--?-----	19.1	30.8936	0.1926	0.0011232	-0.209598	0.0153808	2.758e-42	0.0166063	1.845e-36	913	FALSE	1
	cg26266427-chr6:32560870:SNP	cg26266427	Body	NM_019105	TNXB	Island	chr6	32063838	chr6:32560870:SNP	rs28366299	497032	0.115994	0.0126215	3.921e-20	14659	A	T	0.3186	0.0476	TRUE	21	+??+++?++++?++?+++++???+????+???++-+	0	15.7371	0.7328	0	0.115994	0.0126215	3.921e-20	0.0126215	3.921e-20	913	FALSE	1
	cg26266427-chr6:31235505:SNP	cg26266427	Body	NM_019105	TNXB	Island	chr6	32063838	chr6:31235505:SNP	rs2853953	828333	-0.117082	0.0122392	1.11e-21	17639	A	G	0.2537	0.0239	TRUE	22	---?--??+--?--?-----??--?????-?-?---	30.6	30.2809	0.08649	0.0014967	-0.112273	0.0155375	4.976e-13	0.0176484	3.263e-11	913	FALSE	1
	cg26266427-chr6:31306063:SNP	cg26266427	Body	NM_019105	TNXB	Island	chr6	32063838	chr6:31306063:SNP	rs28752965	757775	-0.146779	0.0102596	1.992e-46	18808	A	G	0.5024	0.0374	TRUE	23	---??---?--?--?-----??--????--??----	13.2	25.36	0.2802	0.0003784	-0.147673	0.0113304	7.902e-39	0.0118265	2.277e-35	913	FALSE	1
	cg26266427-chr6:32652963:SNP	cg26266427	Body	NM_019105	TNXB	Island	chr6	32063838	chr6:32652963:SNP	rs9275166	589125	0.127328	0.0128811	4.843e-23	16576	C	T	0.239	0.016	TRUE	23	---?----?-+?--?-----???-????--??--+-	39.5	36.372	0.02769	0.0025314	0.124492	0.0172922	6.052e-13	0.021296	2.246e-09	913	FALSE	1
	cg26266427-chr6:31325116:SNP	cg26266427	Body	NM_019105	TNXB	Island	chr6	32063838	chr6:31325116:SNP	rs9266219	738722	-0.150926	0.0112797	7.873e-41	17057	G	T	0.3507	0.0328	TRUE	22	+++?+++???+?++?+++++??++????++??++++	19.6	26.1083	0.2024	0.0007002	-0.149703	0.0131202	3.725e-30	0.0140235	5.179e-27	913	FALSE	1
	cg26266427-chr6:32600411:SNP	cg26266427	Body	NM_019105	TNXB	Island	chr6	32063838	chr6:32600411:SNP	rs9272117	536573	-0.113533	0.0114369	3.18e-23	15451	T	C	0.4865	0.0358	TRUE	22	---?----?--?--?+----???-????-??-+?+-	42	36.178	0.02088	0.0021157	-0.11304	0.0157398	6.882e-13	0.0197031	8.303e-09	913	FALSE	1
	cg26266427-chr6:29986324:SNP	cg26266427	Body	NM_019105	TNXB	Island	chr6	32063838	chr6:29986324:SNP	rs3115631		-0.182779	0.0161445	1.028e-29	17563	A	T	0.1259	0.0228	FALSE	25	---?----?--?--?-----?+?+????--?-----	32.1	35.3238	0.06374	0.0031338	-0.174272	0.0206834	3.586e-17	0.0237619	1.447e-14	913	FALSE	1
	cg26266427-chr6:32388709:SNP	cg26266427	Body	NM_019105	TNXB	Island	chr6	32063838	chr6:32388709:SNP	rs3135366	324871	-0.238309	0.0139422	0	17169	C	T	0.1857	0.0203	TRUE	24	+++?++++?++?++?+++++?+?+?????+?+++++	44.1	41.1486	0.01139	0.0037374	-0.240654	0.019581	1.023e-34	0.0249437	1.249e-21	913	FALSE	1
	cg26266427-chr6:32139565:SNP	cg26266427	Body	NM_019105	TNXB	Island	chr6	32063838	chr6:32139565:SNP	rs34280838	75727	0.564355	0.0335303	1.442e-63	19197	C	T	0.0283	0.0117	TRUE	23	---?--?----?--?-----?---?????-?---??	32.6	32.6503	0.06696	0.0128741	0.561431	0.0428816	3.63e-39	0.0497625	8.224e-30	913	FALSE	1
	cg26266427-chr6:32626475:SNP	cg26266427	Body	NM_019105	TNXB	Island	chr6	32063838	chr6:32626475:SNP	rs9273368	562637	-0.175514	0.0130368	2.581e-41	14144	A	G	0.2969	0.0242	TRUE	19	---?-?--?--?--?---??????-??????-----	17.4	21.7959	0.2412	0.0006958	-0.176645	0.0147812	6.44e-33	0.015786	1.021e-28	913	FALSE	1
	cg26266427-chr6:32191620:SNP	cg26266427	Body	NM_019105	TNXB	Island	chr6	32063838	chr6:32191620:SNP	rs3134930	127782	-0.239686	0.0125353	1.692e-81	17165	T	C	0.2399	0.0163	TRUE	24	---?----?--?--?-----?-?-?????-?-----	27.6	31.7773	0.1049	0.0014583	-0.238037	0.0152123	3.448e-55	0.017319	1.473e-43	913	FALSE	1
	cg26266427-chr6:32595747:SNP	cg26266427	Body	NM_019105	TNXB	Island	chr6	32063838	chr6:32595747:SNP	rs9271889	531909	-0.114556	0.0122392	0	13573	A	G	0.4859	0.0346	TRUE	19	---?-?-??--?--?+----????????-??-+?+-	39.5	29.7672	0.03977	0.0019026	-0.114022	0.0165953	6.385e-12	0.0202403	1.516e-08	913	FALSE	1
	cg26266427-chr6:30147230:SNP	cg26266427	Body	NM_019105	TNXB	Island	chr6	32063838	chr6:30147230:SNP	rs2844785		-0.158928	0.0149587	2.293e-26	16716	G	T	0.155	0.0235	FALSE	24	+++?++?+?++?++?+++++?-?-????++?+++-+	32.5	34.0813	0.06399	0.0026361	-0.150284	0.0191447	4.163e-15	0.0221657	7.5e-13	913	FALSE	1
	cg26266427-chr6:32445530:SNP	cg26266427	Body	NM_019105	TNXB	Island	chr6	32063838	chr6:32445530:SNP	rs9269146	381692	-0.137757	0.0126118	8.965e-28	13609	G	T	0.3883	0.057	TRUE	20	+++?+++???+?++?+++++???+????+???++++	27.7	26.2764	0.1227	0.001242	-0.134485	0.0154091	2.6e-18	0.0174417	2.832e-15	913	FALSE	1
	cg26266427-chr6:32449160:SNP	cg26266427	Body	NM_019105	TNXB	Island	chr6	32063838	chr6:32449160:SNP	rs9394099	385322	0.129754	0.0120596	5.351e-27	13834	T	G	0.4523	0.0379	TRUE	20	+++?+++???+?++?+++++???+???????+++++	15.1	22.381	0.2657	0.0005272	0.129872	0.013402	3.311e-22	0.0142056	6.599e-20	913	FALSE	1
	cg26266427-chr6:32608858:SNP	cg26266427	Body	NM_019105	TNXB	Island	chr6	32063838	chr6:32608858:SNP	rs4455710	545020	-0.170948	0.0180195	2.382e-21	6537	T	C	0.3866	0.0329	TRUE	10	-???-???????--?-?-??????????-???-?--	50.5	18.1939	0.03299	0.0035139	-0.163561	0.0276573	3.342e-09	0.0364273	2.694e-06	913	FALSE	1
	cg26266427-chr6:31348830:INDEL	cg26266427	Body	NM_019105	TNXB	Island	chr6	32063838	chr6:31348830:INDEL	chr6:31348830:INDEL	715008	-0.336647	0.0163912	9.79e-94	15770	D	I	0.1381	0.0224	TRUE	21	---??-??-?-?--?-----?---????--???---	38	32.2622	0.04058	0.0036038	-0.342115	0.0226555	1.602e-51	0.0264408	3.921e-37	913	FALSE	1
	cg26266427-chr6:31620520:SNP	cg26266427	Body	NM_019105	TNXB	Island	chr6	32063838	chr6:31620520:SNP	rs3117582	443318	-0.429756	0.0139481	1.86e-208	23664	G	T	0.1243	0.0201	TRUE	29	+++++++++++?++++++++?+++?????+++++++	27.1	38.434	0.09046	0.0021445	-0.433065	0.0172145	1.19e-139	0.0191457	1.38e-111	913	FALSE	1
	cg26266427-chr6:32342691:SNP	cg26266427	Body	NM_019105	TNXB	Island	chr6	32063838	chr6:32342691:SNP	rs7746327	278853	-0.175564	0.0109182	3.524e-58	16773	C	A	0.5041	0.0308	TRUE	24	+++?++?+?++?++?+++++?+?+????++?+++++	0	15.8982	0.8596	0	-0.175564	0.0109182	3.524e-58	0.0109182	3.524e-58	913	FALSE	1
	cg26266427-chr6:32754342:SNP	cg26266427	Body	NM_019105	TNXB	Island	chr6	32063838	chr6:32754342:SNP	rs28986394	690504	0.225556	0.0185936	7.252e-34	21455	A	G	0.077	0.0144	TRUE	28	+++?+++++++?++?+-+++?++++???++?+++-+	30.6	38.8773	0.065	0.0043439	0.211022	0.0234317	2.141e-19	0.0267729	3.615e-17	913	FALSE	1
	cg26266427-chr6:32635605:SNP	cg26266427	Body	NM_019105	TNXB	Island	chr6	32063838	chr6:32635605:SNP	rs77000541	571767	-0.197493	0.0157427	0	8853	A	G	0.3398	0.0418	TRUE	14	---?-?-?????--?---??????????-???-?--	60.4	32.8056	0.001822	0.0055063	-0.195214	0.0270329	5.148e-13	0.0397269	6.651e-07	913	FALSE	1
	cg26266427-chr6:31505096:SNP	cg26266427	Body	NM_019105	TNXB	Island	chr6	32063838	chr6:31505096:SNP	rs13211189	558742	0.373391	0.0380797	1.066e-22	19690	A	G	0.0191	0.0051	TRUE	24	+-?+-+?++++?+-+++++??+++????++++???-	35	35.3809	0.04766	0.0195054	0.3631	0.0509334	1.012e-12	0.058578	1.838e-10	913	FALSE	1
	cg26266427-chr6:32677669:SNP	cg26266427	Body	NM_019105	TNXB	Island	chr6	32063838	chr6:32677669:SNP	rs9380318	613831	-0.133179	0.0116493	0	14674	C	T	0.435	0.0289	TRUE	22	+++?+++???+?+-?+++++?+?+????++??++++	43.3	37.018	0.01675	0.0023137	-0.13526	0.0161711	6.048e-17	0.0205349	8.845e-11	913	FALSE	1
	cg26266427-chr6:32604987:SNP	cg26266427	Body	NM_019105	TNXB	Island	chr6	32063838	chr6:32604987:SNP	rs9272413	541149	-0.248509	0.020579	1.417e-33	6545	C	T	0.2339	0.0282	TRUE	10	+???+???????++?+?+??????????+???+?++	62	23.6868	0.004825	0.0072989	-0.246355	0.0359786	7.527e-12	0.0541613	4.468e-06	913	FALSE	1
	cg26266427-chr6:32754781:SNP	cg26266427	Body	NM_019105	TNXB	Island	chr6	32063838	chr6:32754781:SNP	rs28986402	690943	0.225768	0.0185995	0	21456	T	C	0.0769	0.0143	TRUE	28	+++?+++++++?++?+-+++?++++???++?+++-+	29.4	38.2581	0.07387	0.00412	0.21174	0.0232286	7.831e-20	0.0263549	1.067e-17	913	FALSE	1
	cg26266427-chr6:31242859:SNP	cg26266427	Body	NM_019105	TNXB	Island	chr6	32063838	chr6:31242859:SNP	rs3130693	820979	-0.107202	0.010695	1.201e-23	17310	C	T	0.4846	0.0313	TRUE	23	+++?+++???-?++?+++++?-++????++?+?+-+	47.3	41.781	0.006644	0.0024294	-0.11199	0.0157512	1.161e-12	0.0203113	1.306e-07	913	FALSE	1
	cg26266427-chr6:32574479:SNP	cg26266427	Body	NM_019105	TNXB	Island	chr6	32063838	chr6:32574479:SNP	rs617058	510641	-0.264441	0.0119229	5.45e-109	18162	T	G	0.248	0.0186	TRUE	23	---?----?-??--?-----??--????-??-----	43.5	38.9274	0.01438	0.0025811	-0.265082	0.0168587	1.04e-55	0.0210967	4.824e-36	913	FALSE	1
	cg26266427-chr6:32592602:SNP	cg26266427	Body	NM_019105	TNXB	Island	chr6	32063838	chr6:32592602:SNP	rs9271660	528764	0.138217	0.0124105	8.273e-29	14704	G	T	0.3374	0.0365	TRUE	20	---?-?--?--?--?-----????????-???--+-	14.3	22.1637	0.2762	0.0005237	0.138445	0.0137525	7.733e-24	0.014477	1.33e-21	913	FALSE	1
	cg26266427-chr6:32751384:SNP	cg26266427	Body	NM_019105	TNXB	Island	chr6	32063838	chr6:32751384:SNP	rs28986361	687546	0.225768	0.0185995	6.612e-34	21456	A	G	0.0769	0.0143	TRUE	28	+++?+++++++?++?+-+++?++++???++?+++-+	29.4	38.2581	0.07387	0.00412	0.21174	0.0232286	7.831e-20	0.0263549	1.067e-17	913	FALSE	1
	cg26266427-chr6:32580331:SNP	cg26266427	Body	NM_019105	TNXB	Island	chr6	32063838	chr6:32580331:SNP	rs2858861	516493	0.189396	0.0093866	1.55e-90	22740	T	C	0.449	0.0193	TRUE	27	+++?+++??++?+++++++++?++????++++++-+	42.8	45.4855	0.01041	0.0018129	0.186933	0.0130851	2.676e-46	0.0164213	8.938e-31	913	FALSE	1
	cg26266427-chr6:31306106:SNP	cg26266427	Body	NM_019105	TNXB	Island	chr6	32063838	chr6:31306106:SNP	rs9265772	757732	-0.159121	0.0108193	5.802e-49	18810	T	C	0.3381	0.0319	TRUE	23	---??---?--?--?-----??--????--??----	42.3	38.1525	0.01761	0.002021	-0.16066	0.0151066	2.047e-26	0.0187629	2.24e-17	913	FALSE	1
	cg26266427-chr6:32565164:SNP	cg26266427	Body	NM_019105	TNXB	Island	chr6	32063838	chr6:32565164:SNP	rs28366358	501326	0.187865	0.0156298	2.801e-33	8830	G	A	0.3797	0.0317	TRUE	14	---?-?-?????--?---??????????-???-?+-	53.1	27.6911	0.009991	0.004023	0.18355	0.0245657	7.91e-14	0.0332927	1.673e-08	913	FALSE	1
	cg26266427-chr6:31304742:SNP	cg26266427	Body	NM_019105	TNXB	Island	chr6	32063838	chr6:31304742:SNP	rs28367793	759096	-0.12791	0.0111122	1.165e-30	16164	G	T	0.521	0.0457	TRUE	21	+++?++????+?++?+++++??++????++??++++	13.5	23.1217	0.2829	0.000417	-0.128011	0.0123481	3.51e-25	0.0128467	2.359e-23	913	FALSE	1
	cg26266427-chr6:31240246:INDEL	cg26266427	Body	NM_019105	TNXB	Island	chr6	32063838	chr6:31240246:INDEL	chr6:31240246:INDEL	823592	-0.168002	0.011673	5.779e-47	15685	I	D	0.3646	0.0346	TRUE	20	+++??++???+?++?+++++??++????++???+++	3.1	19.617	0.4179	9.15e-05	-0.168358	0.0119806	7.435e-45	0.0120521	3.635e-44	913	FALSE	1
	cg26266427-chr6:32591666:SNP	cg26266427	Body	NM_019105	TNXB	Island	chr6	32063838	chr6:32591666:SNP	rs9271613	527828	-0.279413	0.012048	0	18934	T	C	0.2287	0.0202	TRUE	23	---?-?--?--?--?-----??-?????--?-----	47.8	42.1251	0.006036	0.0031304	-0.280542	0.0177129	1.694e-56	0.0230692	9.128e-34	913	FALSE	1
	cg26266427-chr6:32560859:SNP	cg26266427	Body	NM_019105	TNXB	Island	chr6	32063838	chr6:32560859:SNP	rs28366298	497021	0.128189	0.0119728	0	16056	C	A	0.3235	0.0462	TRUE	23	-??--------?--?-----???--???-???--+-	13.5	25.4452	0.2763	0.0005262	0.127572	0.0132026	4.347e-22	0.0138477	2.102e-20	913	FALSE	1
	cg26266427-chr6:31068549:SNP	cg26266427	Body	NM_019105	TNXB	Island	chr6	32063838	chr6:31068549:SNP	rs2517558	995289	-0.13991	0.0102605	2.454e-42	20968	T	G	0.34	0.0198	TRUE	27	---?-------?--?+----?---????--?---+-	40.4	43.6342	0.01654	0.0019688	-0.140364	0.0140566	1.762e-23	0.0172196	4.472e-16	913	FALSE	1
	cg26266427-chr6:31237230:SNP	cg26266427	Body	NM_019105	TNXB	Island	chr6	32063838	chr6:31237230:SNP	rs9264596	826608	-0.169521	0.0114076	5.953e-50	16648	A	G	0.3441	0.0257	TRUE	22	---?--??-?-?--?-----??--????--?-?---	22.9	27.2482	0.1628	0.000878	-0.168985	0.0136604	3.778e-35	0.0148017	2.275e-30	913	FALSE	1
	cg26266427-chr6:32576894:SNP	cg26266427	Body	NM_019105	TNXB	Island	chr6	32063838	chr6:32576894:SNP	rs9271130	513056	0.122991	0.0138127	0	10921	A	T	0.4146	0.0344	TRUE	16	?++?+++?????++?+++++??+?????+?????++	26.5	20.3996	0.1571	0.0011547	0.126373	0.0171525	1.737e-13	0.0187849	5.858e-11	913	FALSE	1
	cg26266427-chr6:31306172:INDEL	cg26266427	Body	NM_019105	TNXB	Island	chr6	32063838	chr6:31306172:INDEL	chr6:31306172:INDEL	757666	-0.147849	0.0127178	3.064e-31	12265	I	D	0.4934	0.0411	TRUE	16	?++??++???+??+??++++??++?????+???+++	4.9	15.7785	0.3969	0.0001402	-0.148535	0.0132476	3.55e-29	0.0133779	2.15e-28	913	FALSE	1
	cg26266427-chr6:32573173:SNP	cg26266427	Body	NM_019105	TNXB	Island	chr6	32063838	chr6:32573173:SNP	rs601006	509335	0.200913	0.0150408	1.067e-40	9939	A	G	0.3624	0.0528	TRUE	14	?++??++?????++?+++++??+???????????-+	46.5	24.321	0.0283	0.0029316	0.192982	0.0225452	1.131e-17	0.0281391	9.335e-13	913	FALSE	1
	cg26266427-chr6:32131667:SNP	cg26266427	Body	NM_019105	TNXB	Island	chr6	32063838	chr6:32131667:SNP	rs76230335	67829	0.449013	0.0309351	9.783e-48	20093	A	G	0.0283	0.0074	TRUE	26	+++?++?++++?++?+-+++?+++????++?+++++	0	24.1837	0.5088	0	0.449013	0.0309351	9.783e-48	0.0309351	9.783e-48	913	FALSE	1
	cg26266427-chr6:31355525:SNP	cg26266427	Body	NM_019105	TNXB	Island	chr6	32063838	chr6:31355525:SNP	rs2596558	708313	0.206944	0.0184784	4.113e-29	20896	C	T	0.0908	0.0314	TRUE	27	---?----?--?--?-----?----???--?-----	13.1	29.9154	0.2711	0.001414	0.206686	0.0203733	3.49e-24	0.0212611	2.171e-22	913	FALSE	1
	cg26266427-chr6:31304424:SNP	cg26266427	Body	NM_019105	TNXB	Island	chr6	32063838	chr6:31304424:SNP	rs28752941	759414	-0.143173	0.0127312	0	12264	G	A	0.4984	0.0413	TRUE	16	?++??++???+??+??++++??++?????+???+++	16.5	17.9567	0.265	0.0005339	-0.145259	0.0145267	1.533e-23	0.0152407	5.771e-21	913	FALSE	1
	cg26266427-chr6:32590087:INDEL	cg26266427	Body	NM_019105	TNXB	Island	chr6	32063838	chr6:32590087:INDEL	chr6:32590087:INDEL	526249	0.145969	0.0123969	5.278e-32	15192	D	I	0.3254	0.0409	TRUE	20	+++?+++?????++?+++++??++????+???++-+	26	25.6841	0.1392	0.0011148	0.142676	0.0152129	6.686e-21	0.0167581	3.03e-18	913	FALSE	1
	cg26266427-chr6:31463577:SNP	cg26266427	Body	NM_019105	TNXB	Island	chr6	32063838	chr6:31463577:SNP	rs2534680	600261	-0.191942	0.0096566	6.466e-88	24637	C	T	0.3166	0.022	TRUE	31	+++++++++++?++++++++?++++???++++++++	35.6	46.5684	0.0274	0.0016219	-0.194111	0.0126401	3.19e-53	0.0149898	1.54e-37	913	FALSE	1
	cg26266427-chr6:31070078:SNP	cg26266427	Body	NM_019105	TNXB	Island	chr6	32063838	chr6:31070078:SNP	rs3095303	993760	-0.163111	0.0104875	0	20465	A	G	0.3243	0.0166	TRUE	26	---?-------?--?-----?---?????-?---+-	42.9	43.7929	0.01144	0.0021978	-0.164544	0.0147195	5.184e-29	0.0183711	6.766e-19	913	FALSE	1
	cg26266427-chr6:32915797:SNP	cg26266427	Body	NM_019105	TNXB	Island	chr6	32063838	chr6:32915797:SNP	rs73396802	851959	-0.339474	0.0163182	0	24145	T	C	0.0864	0.0127	TRUE	30	-----------?--------?---????--------	11.8	32.8804	0.2826	0.0010897	-0.34339	0.017876	3.078e-82	0.0185017	3.411e-75	913	FALSE	1
	cg26266427-chr6:32754458:SNP	cg26266427	Body	NM_019105	TNXB	Island	chr6	32063838	chr6:32754458:SNP	rs28986397	690620	0.225658	0.0185908	6.63e-34	21456	C	T	0.077	0.0144	TRUE	28	---?-------?--?-+---?----???--?---+-	30.4	38.7912	0.06618	0.004311	0.211214	0.0233986	1.768e-19	0.0267097	2.949e-17	913	FALSE	1
	cg26266427-chr6:32399785:SNP	cg26266427	Body	NM_019105	TNXB	Island	chr6	32063838	chr6:32399785:SNP	rs3129857	335947	-0.15267	0.0116173	0	17655	G	A	0.3119	0.0361	TRUE	25	+++?++++?++?++?+++++?+?+????++?+++++	41.4	40.9258	0.01697	0.0024148	-0.151818	0.0158786	1.164e-21	0.0198103	1.292e-14	913	FALSE	1
	cg26266427-chr6:31311755:SNP	cg26266427	Body	NM_019105	TNXB	Island	chr6	32063838	chr6:31311755:SNP	rs28380861	752083	0.15967	0.0131405	5.669e-34	19314	G	A	0.1878	0.0271	TRUE	24	---?----?--?--?-----??--????--??--+-	22.4	29.6362	0.1601	0.0012191	0.160481	0.0154799	3.5e-25	0.016932	4.097e-21	913	FALSE	1
	cg26266427-chr6:30227913:SNP	cg26266427	Body	NM_019105	TNXB	Island	chr6	32063838	chr6:30227913:SNP	rs9261629		-0.152458	0.0144195	3.972e-26	16856	T	G	0.1657	0.0214	FALSE	24	---?----?--?--?-----?+?+????--??--+-	28	31.9277	0.1017	0.0019707	-0.145745	0.0177198	1.952e-16	0.0200165	2.604e-14	913	FALSE	1
	cg26266427-chr6:31249478:SNP	cg26266427	Body	NM_019105	TNXB	Island	chr6	32063838	chr6:31249478:SNP	rs9264765	814360	0.12789	0.0101	9.562e-37	20406	G	A	0.3974	0.0179	TRUE	26	---?----?--?--?-+---?---????--?---+-	0	24.2235	0.5065	0	0.12789	0.0101	9.562e-37	0.0101	9.562e-37	913	FALSE	1
	cg26266427-chr3:109045055:SNP	cg26266427	Body	NM_019105	TNXB	Island	chr6	32063838	chr3:109045055:SNP	rs1044266		0.197041	0.0094034	1.72e-97	25379	G	A	0.2871	0.0188	FALSE	32	-----------?------------???---------	9.2	34.1483	0.3188	0.0002914	0.196912	0.0100446	1.438e-85	0.0103584	1.114e-80	913	FALSE	1
	cg26266427-chr6:32590602:SNP	cg26266427	Body	NM_019105	TNXB	Island	chr6	32063838	chr6:32590602:SNP	chr6:32590602:SNP	526764	0.145504	0.0143563	3.855e-24	11547	C	T	0.3169	0.0463	TRUE	15	?--??--???-??-??----??--?????????-+-	30.5	20.1298	0.1261	0.0014119	0.142909	0.0183286	6.338e-15	0.0206421	1.803e-12	913	FALSE	1
	cg26266427-chr6:31306176:SNP	cg26266427	Body	NM_019105	TNXB	Island	chr6	32063838	chr6:31306176:SNP	rs28752971	757662	-0.148782	0.0127289	0	12256	T	G	0.4955	0.0412	TRUE	16	?--??--???-??-??----??--?????-???---	2.1	15.3265	0.4282	5.89e-05	-0.149105	0.0129589	1.231e-30	0.0130059	2.654e-30	913	FALSE	1
	cg26266427-chr6:32080383:SNP	cg26266427	Body	NM_019105	TNXB	Island	chr6	32063838	chr6:32080383:SNP	rs9469084	16545	0.616165	0.0165828	0.000000000000000000000000000000000000000000000000000000000000000000000000000000000000000000000000000000000000000000000000000000000000000000000000000000000000000000000000000000000000000000000000000000000000000000000000000000000000000000000000000000000000000000000000000000000000000000000000000000000000034	24150	T	C	0.0812	0.0169	TRUE	30	+++++++++++?++++++++?+++????++++++++	49.2	57.0408	0.001421	0.0081068	0.611538	0.0245023	1.73e-137	0.0326172	1.357e-79	913	FALSE	1
	cg26266427-chr6:31948421:INDEL	cg26266427	Body	NM_019105	TNXB	Island	chr6	32063838	chr6:31948421:INDEL	chr6:31948421:INDEL	115417	0.443831	0.0143035	2.15e-211	21166	D	I	0.1333	0.0239	TRUE	27	+++++++?+?+?++++++++?+++????+++?++++	52.5	54.7167	0.0008239	0.0062169	0.435821	0.0220062	2.723e-87	0.0301015	3.339e-49	913	FALSE	1
	cg26266427-chr6:31236715:INDEL	cg26266427	Body	NM_019105	TNXB	Island	chr6	32063838	chr6:31236715:INDEL	chr6:31236715:INDEL	827123	-0.16321	0.0114116	2.123e-46	16781	I	D	0.3658	0.0925	TRUE	22	+++?+++?-?+?++?+++++??++????++???+++	31.1	30.501	0.08237	0.0013369	-0.161862	0.0146095	1.582e-28	0.0165745	7.059e-23	913	FALSE	1
	cg26266427-chr6:31091273:SNP	cg26266427	Body	NM_019105	TNXB	Island	chr6	32063838	chr6:31091273:SNP	rs3131000	972565	0.154335	0.0096754	2.789e-57	23288	C	G	0.3661	0.0334	TRUE	29	++++++?++++?+++-++++?+++????++++++-+	45.3	51.1573	0.00479	0.0022827	0.154859	0.0138067	3.395e-29	0.0176774	2.532e-18	913	FALSE	1
	cg26266427-chr6:30508956:SNP	cg26266427	Body	NM_019105	TNXB	Island	chr6	32063838	chr6:30508956:SNP	rs3130117		-0.200063	0.0159459	4.163e-36	17091	A	G	0.1358	0.0234	FALSE	24	---?----?--?--?-----?-?+?????-?---+-	31.5	33.5698	0.07164	0.0028591	-0.191586	0.0203112	4.003e-21	0.0232739	8.253e-18	913	FALSE	1
	cg26266427-chr6:32584329:INDEL	cg26266427	Body	NM_019105	TNXB	Island	chr6	32063838	chr6:32584329:INDEL	chr6:32584329:INDEL	520491	0.263749	0.0164816	1.225e-57	15189	D	I	0.1472	0.0268	TRUE	20	+++?+++?????++?+++++??++????+???++++	39.1	31.1832	0.03854	0.0035867	0.256403	0.0225624	6.305e-30	0.02705	1.837e-22	913	FALSE	1
	cg26266427-chr6:31306551:SNP	cg26266427	Body	NM_019105	TNXB	Island	chr6	32063838	chr6:31306551:SNP	rs9265776	757287	-0.155653	0.0137963	1.607e-29	11397	C	T	0.3464	0.0299	TRUE	15	?++??+????+??+??++++??++?????+???+++	30.5	20.1387	0.1258	0.0013136	-0.159693	0.0176954	1.804e-19	0.0198457	4.393e-15	913	FALSE	1
	cg26266427-chr6:31610384:SNP	cg26266427	Body	NM_019105	TNXB	Island	chr6	32063838	chr6:31610384:SNP	rs1077394	453454	0.117332	0.0103415	7.782e-30	20941	C	T	0.331	0.0309	TRUE	27	-----------?--?-----?---?????-?-----	0	20.156	0.7841	0	0.117332	0.0103415	7.782e-30	0.0103415	7.782e-30	913	FALSE	1
	cg26266427-chr6:31306420:SNP	cg26266427	Body	NM_019105	TNXB	Island	chr6	32063838	chr6:31306420:SNP	rs1625792	757418	-0.333327	0.0143499	2.34e-119	20059	A	G	0.1401	0.0189	TRUE	25	---?----?--?--?-----??--????--?-----	18.1	29.3055	0.2088	0.0011659	-0.335528	0.0165061	7.34e-92	0.0175221	1.095e-80	913	FALSE	1
	cg26266427-chr6:31237061:SNP	cg26266427	Body	NM_019105	TNXB	Island	chr6	32063838	chr6:31237061:SNP	rs2894204	826777	-0.168572	0.010646	0	18889	C	T	0.3528	0.0253	TRUE	24	+++?++?++++?++?+++++??++????++?+?+++	0	21.7389	0.5361	0	-0.168572	0.010646	1.804e-56	0.010646	1.804e-56	913	FALSE	1
	cg26266427-chr6:32223418:SNP	cg26266427	Body	NM_019105	TNXB	Island	chr6	32063838	chr6:32223418:SNP	rs3130321	159580	-0.19939	0.0126343	4.166e-56	17644	T	C	0.2312	0.0214	TRUE	25	---?----?--?--?+----?-?-????--?-----	2.3	24.5572	0.4301	9.4e-05	-0.199326	0.0128316	2.043e-54	0.0129277	1.138e-53	913	FALSE	1
	cg26266427-chr6:32674240:SNP	cg26266427	Body	NM_019105	TNXB	Island	chr6	32063838	chr6:32674240:SNP	rs12192514	610402	0.253514	0.0172719	8.948e-49	17652	T	C	0.1117	0.0242	TRUE	25	+++?++++?++?++?+++++?+?+????++?+++-+	22.9	31.128	0.1501	0.0022542	0.250304	0.0203973	1.289e-34	0.0224017	1.085e-29	913	FALSE	1
	cg26266427-chr6:32601214:INDEL	cg26266427	Body	NM_019105	TNXB	Island	chr6	32063838	chr6:32601214:INDEL	chr6:32601214:INDEL	537376	0.25649	0.0219126	1.2e-31	8331	D	I	0.149	0.0253	TRUE	12	+???+?+?????++?+?+?+????????+???+?++	46.6	20.6142	0.0376	0.0052783	0.256675	0.0323159	1.979e-15	0.0410646	4.211e-10	913	FALSE	1
	cg26266427-chr6:32568685:SNP	cg26266427	Body	NM_019105	TNXB	Island	chr6	32063838	chr6:32568685:SNP	chr6:32568685:SNP	504847	-0.255192	0.0192588	4.471e-40	6795	T	C	0.2561	0.0179	TRUE	9	?--???-??????-??--????-???????????--	35.8	12.4687	0.1315	0.0021631	-0.262069	0.0274115	1.171e-21	0.0300165	1.868e-17	913	FALSE	1
	cg26266427-chr6:30760276:SNP	cg26266427	Body	NM_019105	TNXB	Island	chr6	32063838	chr6:30760276:SNP	rs3129983		-0.192725	0.0154685	1.246e-35	17206	T	C	0.1416	0.0241	FALSE	25	---?----?--?--?-----?-?+-???--?+?---	43.5	42.4513	0.01148	0.0046861	-0.181319	0.0218619	1.096e-16	0.0273607	1.87e-12	913	FALSE	1
	cg26266427-chr6:32592229:SNP	cg26266427	Body	NM_019105	TNXB	Island	chr6	32063838	chr6:32592229:SNP	rs9271643	528391	0.144907	0.0114011	0	17985	A	G	0.3238	0.0413	TRUE	22	+++?+?++?++?++?+++++??++????+???++-+	13.6	24.2991	0.2788	0.0004599	0.14406	0.0126287	3.84e-30	0.0131922	4.548e-28	913	FALSE	1
	cg26266427-chr6:32591411:SNP	cg26266427	Body	NM_019105	TNXB	Island	chr6	32063838	chr6:32591411:SNP	rs28383321	527573	0.252819	0.0163314	4.694e-54	16130	C	T	0.1405	0.0232	TRUE	20	---?---??-??--?-----??-?????-???----	32.4	28.0954	0.08161	0.0026255	0.248153	0.0210818	5.509e-32	0.0241493	1.199e-25	913	FALSE	1
	cg26266427-chr6:31446820:SNP	cg26266427	Body	NM_019105	TNXB	Island	chr6	32063838	chr6:31446820:SNP	rs2243429	617018	-0.155573	0.0103646	0	20482	T	G	0.3389	0.0175	TRUE	26	---?-------?--?-----?---?????-?-----	43.3	44.1118	0.01054	0.0021805	-0.15917	0.0145903	1.041e-27	0.0182881	1.788e-17	913	FALSE	1
	cg26266427-chr6:31932368:SNP	cg26266427	Body	NM_019105	TNXB	Island	chr6	32063838	chr6:31932368:SNP	rs114212545	131470	0.729249	0.079344	3.893e-20	5366	A	G	0.017	0.0069	TRUE	10	???+++??+??????++?++?+???????????+??	45	16.3589	0.05975	0.0523418	0.729874	0.109786	2.968e-11	0.14422	4.27e-07	913	FALSE	1
	cg26266427-chr6:32398841:SNP	cg26266427	Body	NM_019105	TNXB	Island	chr6	32063838	chr6:32398841:SNP	rs3129855	335003	-0.394133	0.016591	9.56e-125	16841	G	A	0.124	0.0197	TRUE	24	+++?+++??++?++?+++++?+?+????++?+++++	34.9	35.3078	0.04847	0.0035943	-0.39765	0.0215631	6.134e-76	0.0254692	5.126e-54	913	FALSE	1
	cg26266427-chr6:32382609:SNP	cg26266427	Body	NM_019105	TNXB	Island	chr6	32063838	chr6:32382609:SNP	rs3129969	318771	-0.235686	0.0136556	9.534e-67	17641	G	C	0.1872	0.0227	TRUE	25	+++?++++?++?++?+++++?+?+????++?+++++	43.2	42.2302	0.01216	0.0035914	-0.238533	0.018989	3.431e-36	0.0240283	1.033e-22	913	FALSE	1
	cg26266427-chr6:32561911:SNP	cg26266427	Body	NM_019105	TNXB	Island	chr6	32063838	chr6:32561911:SNP	rs28366335	498073	-0.123483	0.0176254	2.453e-12	7601	A	G	0.6846	0.037	TRUE	9	-???-??---??-??-????????????-???-???	0	7.53287	0.4804	0	-0.123483	0.0176254	2.453e-12	0.0176254	2.453e-12	913	FALSE	1
	cg26266427-chr6:32573726:SNP	cg26266427	Body	NM_019105	TNXB	Island	chr6	32063838	chr6:32573726:SNP	chr6:32573726:SNP	509888	-0.210332	0.0192885	1.097e-27	5980	G	A	0.3393	0.0324	TRUE	11	?++??++??????+??++++??????????????++	22.9	12.9691	0.2254	0.001257	-0.211839	0.0227539	1.278e-20	0.0250154	4.167e-17	913	FALSE	1
	cg26266427-chr6:32336127:SNP	cg26266427	Body	NM_019105	TNXB	Island	chr6	32063838	chr6:32336127:SNP	rs3129932	272289	0.133916	0.0125795	1.828e-26	17655	G	C	0.237	0.0312	TRUE	25	---?----?--?--?-----?-?-????+-?----+	26.2	32.5021	0.115	0.001421	0.130241	0.0151354	7.629e-18	0.0170359	3.815e-15	913	FALSE	1
	cg26266427-chr6:31436544:SNP	cg26266427	Body	NM_019105	TNXB	Island	chr6	32063838	chr6:31436544:SNP	rs35309880	627294	0.360261	0.0466127	1.085e-14	15774	A	G	0.0155	0.0041	TRUE	19	++??++?++++?+??++++??+++?????+?+???-	28.3	25.1155	0.1218	0.0173866	0.353612	0.0595863	2.948e-09	0.0650388	3.039e-08	913	FALSE	1
	cg26266427-chr6:30787762:SNP	cg26266427	Body	NM_019105	TNXB	Island	chr6	32063838	chr6:30787762:SNP	rs1264353		-0.192262	0.0152826	2.706e-36	17092	A	C	0.1463	0.0248	FALSE	24	---?----?--?--?-----?-?+?????-?+----	46	42.5663	0.007793	0.0048579	-0.180115	0.0221117	3.771e-16	0.0282836	1.064e-11	913	FALSE	1
	cg26266427-chr6:31606756:SNP	cg26266427	Body	NM_019105	TNXB	Island	chr6	32063838	chr6:31606756:SNP	rs2178899	457082	0.23454	0.0146129	5.701e-58	21424	T	A	0.1289	0.0225	TRUE	28	-----------?--?-----?---????+-?-----	33.1	40.3789	0.0472	0.0030208	0.230846	0.018833	1.532e-34	0.0218539	7.186e-27	913	FALSE	1
	cg26266427-chr6:30078330:SNP	cg26266427	Body	NM_019105	TNXB	Island	chr6	32063838	chr6:30078330:SNP	rs2239529		-0.137554	0.014433	1.565e-21	17092	T	C	0.1653	0.0201	FALSE	24	---?+---?--?--?-----?-?+?????-?---+-	21.6	29.3352	0.1695	0.0014024	-0.132708	0.0169217	4.417e-15	0.0184085	7.881e-14	913	FALSE	1
	cg26266427-chr6:32573293:SNP	cg26266427	Body	NM_019105	TNXB	Island	chr6	32063838	chr6:32573293:SNP	rs601481	509455	0.187478	0.0122297	4.843e-53	14653	C	G	0.3694	0.0365	TRUE	19	+++?+++?????++?+++++??+?????+???++-+	45.3	32.9335	0.017	0.0024376	0.180244	0.0177812	3.795e-24	0.022376	5.36e-17	913	FALSE	1
	cg26266427-chr6:31639845:SNP	cg26266427	Body	NM_019105	TNXB	Island	chr6	32063838	chr6:31639845:SNP	rs11758242	423993	0.342215	0.0355549	6.273e-22	19731	A	C	0.0272	0.0167	TRUE	24	+-++++++++??++?+?+++?++-+????+?+++??	37	36.5369	0.03633	0.0180137	0.343534	0.0459286	7.447e-14	0.0564812	1.37e-09	913	FALSE	1
	cg26266427-chr6:30400763:SNP	cg26266427	Body	NM_019105	TNXB	Island	chr6	32063838	chr6:30400763:SNP	rs149543464		-0.198279	0.016432	1.585e-33	16079	A	G	0.134	0.0245	FALSE	23	---?---??--?--?-----?-?+????--??--+-	39.7	36.4598	0.02709	0.0041732	-0.187785	0.0226008	9.672e-17	0.0272321	3.312e-13	913	FALSE	1
	cg26266427-chr6:32560698:SNP	cg26266427	Body	NM_019105	TNXB	Island	chr6	32063838	chr6:32560698:SNP	rs9270559	496860	-0.112103	0.0153083	2.424e-13	8596	G	T	0.4439	0.0505	TRUE	12	+???+?+???+?++?+?+??????????+???+?++	18.6	13.5106	0.2613	0.0006662	-0.110355	0.0175633	3.315e-10	0.0188022	2.488e-09	913	FALSE	1
	cg26266427-chr6:32432233:SNP	cg26266427	Body	NM_019105	TNXB	Island	chr6	32063838	chr6:32432233:SNP	rs9268907	368395	-0.184805	0.0156322	3.002e-32	10550	G	A	0.2675	0.0353	TRUE	17	?++??++???+??+?+++++???+?????+?+?+++	25.3	21.4244	0.1628	0.0014363	-0.185752	0.0186917	2.854e-23	0.0209318	1.057e-18	913	FALSE	1
	cg26266427-chr6:32668946:SNP	cg26266427	Body	NM_019105	TNXB	Island	chr6	32063838	chr6:32668946:SNP	rs1613056	605108	-0.368289	0.0151586	2.17e-130	17649	T	C	0.1416	0.0184	TRUE	25	---?----?--?--?-----?-?-????--?-----	34.6	36.7126	0.04673	0.0030865	-0.368341	0.0195388	2.84e-79	0.0231879	8.339e-57	913	FALSE	1
	cg26266427-chr6:32692238:SNP	cg26266427	Body	NM_019105	TNXB	Island	chr6	32063838	chr6:32692238:SNP	rs9275902	628400	0.113616	0.015187	7.368e-14	18121	G	T	0.1464	0.032	TRUE	26	--+?+---?--?--?-----?-?--???--?---++	28.1	34.7554	0.09272	0.0023768	0.109928	0.0185904	3.356e-09	0.0211132	7.396e-08	913	FALSE	1
	cg26266427-chr6:32224792:SNP	cg26266427	Body	NM_019105	TNXB	Island	chr6	32063838	chr6:32224792:SNP	rs9268012	160954	-0.186878	0.0124918	1.338e-50	17414	A	G	0.2431	0.0233	TRUE	25	---?----?--?--?+----?-?--???--??----	13.6	27.7872	0.2691	0.0006249	-0.186713	0.0137399	4.65e-42	0.014463	3.421e-38	913	FALSE	1
	cg26266427-chr6:32360849:SNP	cg26266427	Body	NM_019105	TNXB	Island	chr6	32063838	chr6:32360849:SNP	rs17208671	297011	0.157805	0.0127832	5.2e-35	17640	T	G	0.2243	0.0212	TRUE	25	+++?++++?++?++?+++++?-?+????++?+++++	7.6	25.9665	0.3549	0.0003399	0.157126	0.0134751	2.029e-31	0.0138306	3.734e-30	913	FALSE	1
	cg26266427-chr6:31628113:SNP	cg26266427	Body	NM_019105	TNXB	Island	chr6	32063838	chr6:31628113:SNP	rs805263	435725	0.359842	0.0322961	0	19084	C	A	0.03	0.0112	TRUE	25	-----+?---??--?-----?----????-?---+?	14.6	28.1002	0.2558	0.0045168	0.355407	0.0357026	2.406e-23	0.0378136	1.796e-21	913	TRUE	1
	cg26266427-chr6:32757468:SNP	cg26266427	Body	NM_019105	TNXB	Island	chr6	32063838	chr6:32757468:SNP	rs28986420	693630	0.226221	0.0185969	0	21456	T	C	0.0769	0.0143	TRUE	28	+++?+++++++?++?+-+++?++++???++?+++-+	29.6	38.3489	0.07251	0.004152	0.212184	0.0232557	7.245e-20	0.0264138	1.085e-17	913	FALSE	1
	cg26266427-chr6:32415426:SNP	cg26266427	Body	NM_019105	TNXB	Island	chr6	32063838	chr6:32415426:SNP	rs3135386	351588	-0.220093	0.013307	1.9e-61	17650	G	A	0.202	0.02	TRUE	25	+++?++++?++?++?+++++?+?+????++?+++++	45.6	44.1065	0.007415	0.0037584	-0.220866	0.0188601	1.123e-31	0.0244551	2.26e-19	913	FALSE	1
	cg26266427-chr6:32593167:SNP	cg26266427	Body	NM_019105	TNXB	Island	chr6	32063838	chr6:32593167:SNP	rs4587163	529329	0.148747	0.0111275	9.361e-41	17502	T	C	0.3737	0.0306	TRUE	21	+++?+?++?++?++?+++++??+?????+???++-+	0	12.1004	0.9126	0	0.148747	0.0111275	9.361e-41	0.0111275	9.361e-41	913	FALSE	1
	cg26266427-chr6:31807682:SNP	cg26266427	Body	NM_019105	TNXB	Island	chr6	32063838	chr6:31807682:SNP	rs34287387	256156	-0.534418	0.0564923	3.079e-21	10088	A	G	0.9858	0.0023	TRUE	14	?-?-+-?--?-?-??--?-???--???????????-	39.6	21.5114	0.06341	0.0325645	-0.518558	0.0813161	1.805e-10	0.0934792	1.084e-08	913	FALSE	1
	cg26266427-chr6:32437069:SNP	cg26266427	Body	NM_019105	TNXB	Island	chr6	32063838	chr6:32437069:SNP	rs145940815	373231	-0.179667	0.0126781	1.376e-45	16262	A	T	0.2611	0.0348	TRUE	23	---?---??--?--?-----???--???--??----	24.6	29.1949	0.1394	0.0012263	-0.178078	0.015061	2.941e-32	0.0168244	1.276e-26	913	FALSE	1
	cg26266427-chr6:31308790:SNP	cg26266427	Body	NM_019105	TNXB	Island	chr6	32063838	chr6:31308790:SNP	rs28771384	755048	-0.141057	0.0105572	1.018e-40	17836	A	G	0.5029	0.0395	TRUE	23	---?----??-?--?-----??--????--??----	14.6	25.7576	0.2622	0.0004486	-0.141853	0.0117851	2.28e-33	0.0123603	3.638e-30	913	FALSE	1
	cg26266427-chr6:31305098:SNP	cg26266427	Body	NM_019105	TNXB	Island	chr6	32063838	chr6:31305098:SNP	rs28367809	758740	-0.148964	0.0127258	0	12256	A	G	0.4958	0.0422	TRUE	16	?--??--???-??-??----??--?????-???---	2.3	15.3608	0.4258	6.51e-05	-0.149331	0.0129789	1.235e-30	0.0130319	2.935e-30	913	FALSE	1
	cg26266427-chr6:32448652:SNP	cg26266427	Body	NM_019105	TNXB	Island	chr6	32063838	chr6:32448652:SNP	rs7748435	384814	-0.158092	0.0141658	6.391e-29	13315	C	T	0.255	0.0347	TRUE	19	+++?+++???+?-+?+++++???????????+++++	52.4	37.7795	0.004142	0.0042702	-0.153065	0.0216088	1.406e-12	0.029732	1.054e-07	913	FALSE	1
	cg26266427-chr6:32752546:SNP	cg26266427	Body	NM_019105	TNXB	Island	chr6	32063838	chr6:32752546:SNP	rs13203581	688708	0.231321	0.0191326	1.187e-33	20248	G	A	0.0772	0.0146	TRUE	26	---?-------?--?-+---?----????-??--+-	31.9	36.69	0.06176	0.0045497	0.216572	0.0244222	7.459e-19	0.028079	1.748e-16	913	FALSE	1
	cg26266427-chr6:31909941:SNP	cg26266427	Body	NM_019105	TNXB	Island	chr6	32063838	chr6:31909941:SNP	rs1265905	153897	-0.439323	0.0140436	8e-215	24139	G	A	0.123	0.0211	TRUE	30	+++++++++++?++++++++?+++????++++++++	34.3	44.1582	0.03545	0.0031616	-0.441495	0.0185542	3.77e-125	0.0213841	8.65e-94	913	FALSE	1
	cg26266427-chr6:31334174:SNP	cg26266427	Body	NM_019105	TNXB	Island	chr6	32063838	chr6:31334174:SNP	rs2596574	729664	0.210204	0.0183086	1.64e-30	20413	A	G	0.0915	0.0301	TRUE	26	+++?++++?++?++?+++++?++++????+?++++-	17.2	30.1856	0.2174	0.001838	0.209181	0.0207297	6.062e-24	0.0221062	1.928e-21	913	FALSE	1
	cg26266427-chr6:32753024:INDEL	cg26266427	Body	NM_019105	TNXB	Island	chr6	32063838	chr6:32753024:INDEL	chr6:32753024:INDEL	689186	0.237534	0.0200444	2.143e-32	17987	D	I	0.0794	0.0135	TRUE	24	+++?+++?+?+?++?+-+++?+++????++??++-+	30.8	33.2164	0.07737	0.0043952	0.223147	0.0254406	1.767e-18	0.028948	2.296e-16	913	FALSE	1
	cg26266427-chr6:31826705:SNP	cg26266427	Body	NM_019105	TNXB	Island	chr6	32063838	chr6:31826705:SNP	rs67682613	237133	-0.314133	0.0129938	0	22366	A	G	0.1541	0.0204	TRUE	28	------?----?-------??---????--------	52.4	56.7297	0.0006959	0.00532	-0.31991	0.0201821	1.379e-56	0.0273012	1.228e-30	913	FALSE	1
	cg26266427-chr6:32154285:SNP	cg26266427	Body	NM_019105	TNXB	Island	chr6	32063838	chr6:32154285:SNP	rs204995	90447	-0.137693	0.0116206	2.175e-32	19926	G	A	0.2454	0.0325	TRUE	25	+++?++++?++?++?-++++?+++?????+?+++++	9.2	26.4399	0.3312	0.0003508	-0.137405	0.0124653	2.96e-28	0.0128019	5.575e-27	913	FALSE	1
	cg26266427-chr6:32430362:SNP	cg26266427	Body	NM_019105	TNXB	Island	chr6	32063838	chr6:32430362:SNP	rs4428528	366524	-0.187557	0.0121243	5.571e-54	17655	G	C	0.2651	0.0324	TRUE	25	+++?++++?++?++?+++++?+?+????++?+++++	33.3	35.9873	0.05504	0.0018599	-0.187079	0.0154116	6.574e-34	0.0181801	5.925e-25	913	FALSE	1
	cg26266427-chr6:32404878:SNP	cg26266427	Body	NM_019105	TNXB	Island	chr6	32063838	chr6:32404878:SNP	rs2395174	341040	-0.148851	0.0121066	9.63e-35	16308	G	T	0.3106	0.0373	TRUE	23	+++?++?+?++?++?+++++?+?+?????+?+++++	32.4	32.5232	0.0689	0.0016405	-0.148621	0.0153722	4.117e-22	0.0178975	9.032e-17	913	FALSE	1
	cg26266427-chr6:30735979:SNP	cg26266427	Body	NM_019105	TNXB	Island	chr6	32063838	chr6:30735979:SNP	rs3130665		-0.199693	0.0157404	7.008e-37	16477	T	C	0.141	0.0243	FALSE	24	---?----?--?--?-----?-?+-???--???---	35.2	35.5015	0.04634	0.0032974	-0.191222	0.0206967	2.482e-20	0.024296	2.049e-16	913	FALSE	1
	cg26266427-chr6:32758774:SNP	cg26266427	Body	NM_019105	TNXB	Island	chr6	32063838	chr6:32758774:SNP	rs12660559	694936	0.225587	0.0185852	6.642e-34	21442	C	T	0.077	0.0143	TRUE	28	---?-------?--?-+---?----???--?---+-	30	38.5648	0.06936	0.0042255	0.211353	0.023313	1.236e-19	0.0265457	1.928e-17	913	FALSE	1
	cg26266427-chr6:32601043:SNP	cg26266427	Body	NM_019105	TNXB	Island	chr6	32063838	chr6:32601043:SNP	rs9272155	537205	0.128537	0.0137578	9.382e-21	10787	T	C	0.5059	0.04	TRUE	17	+++?+++?????++?-++++????????+???+?++	52.9	33.9982	0.005436	0.003715	0.123666	0.0212557	5.954e-09	0.0292339	1.098e-05	913	FALSE	1
	cg26266427-chr6:32770688:SNP	cg26266427	Body	NM_019105	TNXB	Island	chr6	32063838	chr6:32770688:SNP	rs6457680	706850	-0.171999	0.0096337	2.7e-71	23733	A	T	0.333	0.0289	TRUE	30	------?----?--------?----???--------	34.8	44.5065	0.03284	0.0015139	-0.172399	0.0125457	5.715e-43	0.014785	2.789e-31	913	FALSE	1
	cg26266427-chr6:32567757:SNP	cg26266427	Body	NM_019105	TNXB	Island	chr6	32063838	chr6:32567757:SNP	rs74587827	503919	-0.205092	0.0135348	7.245e-52	11973	A	G	0.3454	0.0294	TRUE	17	---?-?-??-??--?---?-????????-??--?--	34.1	24.2764	0.08364	0.0016504	-0.202845	0.0174852	4.075e-31	0.020536	1.739e-23	913	FALSE	1
	cg26266427-chr6:32635705:SNP	cg26266427	Body	NM_019105	TNXB	Island	chr6	32063838	chr6:32635705:SNP	rs77617807	571867	0.254229	0.0289665	1.684e-18	6678	T	A	0.1056	0.0282	TRUE	11	-???-???????--?---??????????-???-?+-	0	6.91752	0.7332	0	0.254229	0.0289665	1.684e-18	0.0289665	1.684e-18	913	FALSE	1
	cg26266427-chr6:32751408:INDEL	cg26266427	Body	NM_019105	TNXB	Island	chr6	32063838	chr6:32751408:INDEL	chr6:32751408:INDEL	687570	0.238688	0.0201189	1.823e-32	17976	D	I	0.0789	0.0138	TRUE	24	+++?+++?+?+?++?+-+++?+++????++??++-+	31.7	33.6629	0.07019	0.0046205	0.223769	0.0257087	3.204e-18	0.0294461	5.233e-16	913	FALSE	1
	cg26266427-chr6:31306960:SNP	cg26266427	Body	NM_019105	TNXB	Island	chr6	32063838	chr6:31306960:SNP	rs28753007	756878	0.128254	0.0138412	1.93e-20	10363	A	G	0.487	0.0436	TRUE	14	?++??+????+??+?+++????++?????+???+++	0	9.11276	0.7644	0	0.128254	0.0138412	1.93e-20	0.0138412	1.93e-20	913	FALSE	1
	cg26266427-chr6:31304225:SNP	cg26266427	Body	NM_019105	TNXB	Island	chr6	32063838	chr6:31304225:SNP	rs28752932	759613	-0.143803	0.0132195	1.466e-27	11393	A	G	0.5027	0.042	TRUE	15	?--??-????-??-??----??--?????-???---	2.5	14.3556	0.4236	7e-05	-0.144127	0.0135066	1.393e-26	0.0135553	2.717e-26	913	FALSE	1
	cg26266427-chr6:31338941:SNP	cg26266427	Body	NM_019105	TNXB	Island	chr6	32063838	chr6:31338941:SNP	rs2853983	724897	-0.177119	0.0102891	2.079e-66	20229	T	C	0.3533	0.041	TRUE	26	---?-------?--?-----?---????--??----	35.7	38.9092	0.03762	0.0015672	-0.180395	0.013629	5.432e-40	0.0160136	1.95e-28	913	FALSE	1
	cg26266427-chr6:32610786:SNP	cg26266427	Body	NM_019105	TNXB	Island	chr6	32063838	chr6:32610786:SNP	rs1048645	546948	-0.224082	0.0179104	6.476e-36	7981	T	C	0.2652	0.0308	TRUE	11	-???-????-??--?-?-??????????-???-?--	38.2	16.1934	0.09423	0.0022884	-0.218153	0.0242819	2.607e-19	0.0290031	1.108e-14	913	FALSE	1
	cg26266427-chr6:32445114:SNP	cg26266427	Body	NM_019105	TNXB	Island	chr6	32063838	chr6:32445114:SNP	rs28895257	381276	0.138298	0.0118416	1.631e-31	14363	G	A	0.4522	0.0342	TRUE	21	---?----??-?--?-----???-????-???----	22.3	25.7562	0.174	0.0008625	0.139012	0.0138722	1.234e-23	0.0152497	1.202e-19	913	FALSE	1
	cg26266427-chr6:31973863:SNP	cg26266427	Body	NM_019105	TNXB	Island	chr6	32063838	chr6:31973863:SNP	rs28361033	89975	0.179205	0.0109895	0	16594	C	T	0.5086	0.0428	TRUE	23	------??-?-?--?-+--??---????--??----	38.7	35.8739	0.03132	0.0018064	0.177512	0.0150157	3.014e-32	0.0179198	1.518e-23	913	FALSE	1
	cg26266427-chr6:32577604:SNP	cg26266427	Body	NM_019105	TNXB	Island	chr6	32063838	chr6:32577604:SNP	rs535852	513766	0.177485	0.0095521	4.608e-77	22772	T	C	0.4032	0.0303	TRUE	27	+++?++++?+-?+++++++++?++????+++?++-+	51.3	53.3487	0.001225	0.0026346	0.173232	0.0144636	4.687e-33	0.0195998	1.36e-19	913	FALSE	1
	cg26266427-chr6:31071231:SNP	cg26266427	Body	NM_019105	TNXB	Island	chr6	32063838	chr6:31071231:SNP	rs12197796	992607	0.212896	0.0160221	2.729e-40	21451	T	C	0.1015	0.0086	TRUE	28	+++?+++++++?++?+++++?++++???++?+++-+	3.3	27.9337	0.4144	0.0002528	0.213022	0.0164187	1.709e-38	0.0165761	9.347e-38	913	FALSE	1
	cg26266427-chr6:32593003:SNP	cg26266427	Body	NM_019105	TNXB	Island	chr6	32063838	chr6:32593003:SNP	rs9271690	529165	-0.271984	0.0171362	9.925e-57	9309	C	T	0.2287	0.0245	TRUE	12	?++???+???+??+??++++??+???????????++	20.8	13.8928	0.239	0.0010092	-0.274947	0.0206993	2.908e-40	0.0216428	3.208e-36	913	FALSE	1
	cg26266427-chr6:32106014:SNP	cg26266427	Body	NM_019105	TNXB	Island	chr6	32063838	chr6:32106014:SNP	rs6904786	42176	0.253424	0.0164506	0	20964	A	C	0.0989	0.0172	TRUE	27	+++?+++++++?++?+++++?+++????++?+++++	18.1	31.7352	0.202	0.0016393	0.253235	0.0187597	1.587e-41	0.0200794	1.615e-36	913	FALSE	1
	cg26266427-chr6:31239227:SNP	cg26266427	Body	NM_019105	TNXB	Island	chr6	32063838	chr6:31239227:SNP	rs9264664	824611	-0.171233	0.0113387	1.582e-51	17003	C	T	0.3413	0.033	TRUE	23	+++?++??+?+?++?+++++?+++????++?+?+++	9.3	24.2678	0.3333	0.0003144	-0.171502	0.0122413	1.352e-44	0.0125076	1.16e-42	913	FALSE	1
	cg26266427-chr6:32252678:SNP	cg26266427	Body	NM_019105	TNXB	Island	chr6	32063838	chr6:32252678:SNP	rs9268125	188840	-0.205198	0.0125874	9.563e-60	17656	C	T	0.2313	0.0221	TRUE	25	+++?++++?++?++?-++++?+?++????+?+++++	15.5	28.3875	0.244	0.0007348	-0.205362	0.0140187	1.366e-48	0.0148885	3.255e-43	913	FALSE	1
	cg26266427-chr6:32610105:SNP	cg26266427	Body	NM_019105	TNXB	Island	chr6	32063838	chr6:32610105:SNP	rs28383463	546267	0.253893	0.0240231	4.163e-26	7426	G	A	0.1403	0.0272	TRUE	11	-???-?-?????--?-?-??????????-???-?+-	42.4	17.3704	0.06656	0.0049858	0.247273	0.0344635	7.235e-13	0.0417293	1.17e-09	913	FALSE	1
	cg26266427-chr6:31897911:SNP	cg26266427	Body	NM_019105	TNXB	Island	chr6	32063838	chr6:31897911:SNP	rs147906938	165927	0.455079	0.0298943	2.492e-52	21673	A	T	0.0346	0.0209	TRUE	27	+++++++++++?++?-++++?+++?????++?++++	7	27.9648	0.3602	0.0018771	0.454148	0.0317447	2e-46	0.0321534	1.78e-45	913	FALSE	1
	cg26266427-chr6:31237563:SNP	cg26266427	Body	NM_019105	TNXB	Island	chr6	32063838	chr6:31237563:SNP	rs3819287	826275	-0.175257	0.0110003	3.797e-57	18134	C	T	0.3381	0.0303	TRUE	23	+++?++??-++?++?+++++??++????++?+?+++	15.2	25.9324	0.2546	0.0005116	-0.175261	0.0123964	2.213e-45	0.0129666	1.256e-41	913	FALSE	1
	cg26266427-chr6:32313653:SNP	cg26266427	Body	NM_019105	TNXB	Island	chr6	32063838	chr6:32313653:SNP	rs3117133	249815	0.135888	0.0123021	2.293e-28	18142	G	C	0.241	0.0292	TRUE	26	---?----?--?--?-----?-?+-???+-?----+	34.7	38.2983	0.04325	0.002121	0.131903	0.0158378	8.199e-17	0.0188459	5.576e-13	913	FALSE	1
	cg26266427-chr6:32588831:SNP	cg26266427	Body	NM_019105	TNXB	Island	chr6	32063838	chr6:32588831:SNP	rs9271480	524993	0.134327	0.0116665	1.124e-30	17820	A	G	0.3168	0.0546	TRUE	22	+++?+++??++?++?+++++??++????+???++-+	24.6	27.8531	0.1444	0.0010026	0.131324	0.014107	1.288e-20	0.0154738	3.926e-18	913	FALSE	1
	cg26266427-chr6:30358591:SNP	cg26266427	Body	NM_019105	TNXB	Island	chr6	32063838	chr6:30358591:SNP	rs3094050		-0.194739	0.0161853	0	16252	G	A	0.135	0.0211	FALSE	23	+++?++++?++?++?+++++?-?-?????+?+?+-+	31.1	31.9307	0.07859	0.0027759	-0.184012	0.0205262	3.111e-19	0.0234913	1.134e-16	913	FALSE	1
	cg26266427-chr6:32565272:SNP	cg26266427	Body	NM_019105	TNXB	Island	chr6	32063838	chr6:32565272:SNP	rs9270620	501434	-0.270011	0.0138231	0	13848	A	T	0.2359	0.0173	TRUE	17	---?-?--?-??--?---????-?????-???-?--	55.1	35.6589	0.003226	0.0041645	-0.269382	0.0224133	2.828e-33	0.0308072	1.875e-18	913	FALSE	1
	cg26266427-chr6:31217711:SNP	cg26266427	Body	NM_019105	TNXB	Island	chr6	32063838	chr6:31217711:SNP	rs28749561	846127	0.0898986	0.012563	8.319e-13	21445	C	T	0.1875	0.0293	TRUE	28	---?-------?--?++---?----???--?---+-	0	25.4076	0.5516	0	0.0898986	0.012563	8.319e-13	0.012563	8.319e-13	913	FALSE	1
	cg26266427-chr6:32399842:SNP	cg26266427	Body	NM_019105	TNXB	Island	chr6	32063838	chr6:32399842:SNP	rs2395172	336004	-0.154998	0.0117897	1.775e-39	17168	C	T	0.3099	0.0347	TRUE	24	+++?++++?++?++?+++++?+?+?????+?+++++	41.6	39.3758	0.01804	0.0024123	-0.154732	0.016166	1.055e-21	0.020184	1.6e-14	913	FALSE	1
	cg26266427-chr6:32566232:SNP	cg26266427	Body	NM_019105	TNXB	Island	chr6	32063838	chr6:32566232:SNP	rs9270665	502394	-0.274484	0.0137034	0	14112	T	G	0.2361	0.0169	TRUE	17	---?-?--?-??--?---????-????????--?--	56.5	36.809	0.002231	0.0043241	-0.275043	0.0225194	2.63e-34	0.0315255	3.128e-18	913	FALSE	1
	cg26266427-chr6:31306886:SNP	cg26266427	Body	NM_019105	TNXB	Island	chr6	32063838	chr6:31306886:SNP	rs28753002	756952	0.140987	0.012379	4.734e-30	13064	A	G	0.4779	0.0487	TRUE	18	?++??+????+?++?+++++??++????++???+++	0	14.104	0.6597	0	0.140987	0.012379	4.734e-30	0.012379	4.734e-30	913	FALSE	1
	cg26266427-chr6:32660707:SNP	cg26266427	Body	NM_019105	TNXB	Island	chr6	32063838	chr6:32660707:SNP	rs2858323	596869	0.243163	0.0190963	3.853e-37	14674	T	C	0.111	0.0257	TRUE	22	+++?+++???+?++?+++++?+?+????++??++-+	15.6	24.8848	0.2522	0.001517	0.24007	0.021417	3.669e-29	0.022629	6.214e-27	913	FALSE	1
	cg26266427-chr6:32962130:SNP	cg26266427	Body	NM_019105	TNXB	Island	chr6	32063838	chr6:32962130:SNP	rs113913737	898292	-0.33333	0.0167645	0	23236	T	C	0.0854	0.0141	TRUE	29	-----------?-------??---????--------	15	32.932	0.2383	0.0014659	-0.338204	0.0188417	4.817e-72	0.0197174	4.111e-64	913	FALSE	1
	cg26266427-chr6:32401534:SNP	cg26266427	Body	NM_019105	TNXB	Island	chr6	32063838	chr6:32401534:SNP	rs3135337	337696	-0.14443	0.011925	0	16794	T	C	0.3117	0.0389	TRUE	24	---?--?-?--?--?+----?-?-????--?-----	38.7	37.5139	0.0287	0.0021892	-0.142942	0.0159622	3.395e-19	0.0194502	1.122e-13	913	FALSE	1
	cg26266427-chr6:32586755:SNP	cg26266427	Body	NM_019105	TNXB	Island	chr6	32063838	chr6:32586755:SNP	rs28383307	522917	0.245016	0.0144376	1.352e-64	15739	T	C	0.1947	0.0218	TRUE	20	+++?++++?+??++?+++++??+?????+???+?++	0	14.7092	0.7409	0	0.245016	0.0144376	1.352e-64	0.0144376	1.352e-64	913	FALSE	1
	cg26266427-chr6:32420286:SNP	cg26266427	Body	NM_019105	TNXB	Island	chr6	32063838	chr6:32420286:SNP	rs3129894	356448	-0.237734	0.0138004	1.677e-66	16559	A	G	0.1994	0.0212	TRUE	24	---?----?--?--?--?--?-?-????--?-----	37.6	36.8319	0.03386	0.0027892	-0.237254	0.0182168	8.944e-39	0.0220997	5.474e-27	913	FALSE	1
	cg26266427-chr6:32589867:SNP	cg26266427	Body	NM_019105	TNXB	Island	chr6	32063838	chr6:32589867:SNP	rs9271527	526029	-0.153502	0.0109327	8.8e-45	18611	T	C	0.3403	0.04	TRUE	23	---?----?--?--?-----??--????-???----	47.3	41.775	0.006655	0.0025322	-0.154513	0.016025	5.314e-22	0.0207597	1.423e-13	913	FALSE	1
	cg26266427-chr6:31460056:SNP	cg26266427	Body	NM_019105	TNXB	Island	chr6	32063838	chr6:31460056:SNP	rs2904592	603782	-0.125346	0.0096422	1.228e-38	22187	C	T	0.4103	0.035	TRUE	28	+++++++++++?++++++++?+++?????+?+++++	41.3	45.9792	0.01279	0.0018645	-0.132123	0.0132888	2.721e-23	0.0164201	2.281e-14	913	FALSE	1
	cg26266427-chr6:32771964:SNP	cg26266427	Body	NM_019105	TNXB	Island	chr6	32063838	chr6:32771964:SNP	rs9276749	708126	-0.172515	0.0096186	6.234e-72	23782	G	T	0.3338	0.0289	TRUE	30	++++++?++++?++++++++?++++???++++++++	35.1	44.6774	0.03162	0.0015258	-0.172925	0.012552	3.518e-43	0.0148185	2.525e-31	913	FALSE	1
	cg26266427-chr6:32749175:SNP	cg26266427	Body	NM_019105	TNXB	Island	chr6	32063838	chr6:32749175:SNP	rs28986350	685337	0.224963	0.0186731	2.001e-33	21455	T	C	0.0765	0.0143	TRUE	28	+++?+++++++?++?+-+++?++++???++?+++-+	29.2	38.1152	0.07606	0.0040975	0.211743	0.0232557	8.627e-20	0.0263604	1.412e-17	913	FALSE	1
	cg26266427-chr6:32592124:SNP	cg26266427	Body	NM_019105	TNXB	Island	chr6	32063838	chr6:32592124:SNP	rs9271637	528286	0.145827	0.0114064	1.997e-37	17934	G	A	0.3231	0.0392	TRUE	22	---?-?--?--?--?-----??--????-???--+-	8.7	23.0037	0.3438	0.0002796	0.145234	0.0121785	8.722e-33	0.0124948	1.792e-31	913	FALSE	1
	cg26266427-chr6:32378787:SNP	cg26266427	Body	NM_019105	TNXB	Island	chr6	32063838	chr6:32378787:SNP	rs9268513	314949	-0.172199	0.0106392	6.401e-59	17654	T	C	0.4776	0.0232	TRUE	25	---?----?--?--?-----?-?--????-?-----	30.5	34.5292	0.07569	0.0012584	-0.173741	0.0132295	2.134e-39	0.0153068	2.32e-29	913	FALSE	1
	cg26266427-chr6:32160761:INDEL	cg26266427	Body	NM_019105	TNXB	Island	chr6	32063838	chr6:32160761:INDEL	chr6:32160761:INDEL	96923	0.330387	0.0328817	9.398e-24	15257	D	I	0.0342	0.0079	TRUE	20	+++??++?????++?+++++?+++?????+??+++-	0	15.2459	0.7068	0	0.330387	0.0328817	9.398e-24	0.0328817	9.398e-24	913	FALSE	1
	cg26266427-chr6:32291643:SNP	cg26266427	Body	NM_019105	TNXB	Island	chr6	32063838	chr6:32291643:SNP	rs521828	227805	-0.202003	0.0119205	2.063e-64	17166	T	C	0.2826	0.0171	TRUE	24	---?----?--?--?-----?-?-?????-?-----	9.6	25.4558	0.3272	0.0003696	-0.202059	0.0127376	1.139e-56	0.0131933	6.45e-53	913	FALSE	1
	cg26266427-chr6:31345596:SNP	cg26266427	Body	NM_019105	TNXB	Island	chr6	32063838	chr6:31345596:SNP	rs2507984	718242	-0.17786	0.0106173	5.485e-63	19063	A	G	0.3559	0.0366	TRUE	24	---?--?-?--?--?-----?---?????-?-----	36.2	36.0582	0.04069	0.0015739	-0.182865	0.0141291	2.592e-38	0.0166452	1.192e-26	913	FALSE	1
	cg26266427-chr6:31905130:SNP	cg26266427	Body	NM_019105	TNXB	Island	chr6	32063838	chr6:31905130:SNP	rs1042663	158708	0.344626	0.0156608	2.54e-107	24641	A	G	0.095	0.0169	TRUE	31	+++++++++++?++++-+++?++++???++++++++	29.8	42.7281	0.06191	0.003273	0.341396	0.019511	1.494e-68	0.0223051	7.484e-54	913	FALSE	1
	cg26266427-chr6:31704294:SNP	cg26266427	Body	NM_019105	TNXB	Island	chr6	32063838	chr6:31704294:SNP	rs3131383	359544	-0.432067	0.0140278	2.55e-208	23283	T	G	0.1247	0.02	TRUE	29	------?----?--------?---????--------	26.9	38.2936	0.09297	0.0021412	-0.434676	0.0172998	2.58e-139	0.0191848	2.57e-112	913	FALSE	1
	cg26266427-chr6:31313148:SNP	cg26266427	Body	NM_019105	TNXB	Island	chr6	32063838	chr6:31313148:SNP	rs4398728	750690	0.125832	0.0106237	2.298e-32	18554	T	A	0.3907	0.0532	TRUE	23	---?---??--?--?-----??--????--??--+-	38.3	35.6278	0.03327	0.0016454	0.1284	0.0143091	2.877e-19	0.0172045	2.594e-13	913	FALSE	1
	cg26266427-chr6:32770443:SNP	cg26266427	Body	NM_019105	TNXB	Island	chr6	32063838	chr6:32770443:SNP	rs6919657	706605	-0.167056	0.0096605	5.343e-67	23296	C	A	0.3405	0.0289	TRUE	29	++++++?++++?++++++++?++++????+++++++	38.6	45.5892	0.01921	0.0017297	-0.167417	0.012993	5.454e-38	0.0157292	2.385e-26	913	FALSE	1
	cg26266427-chr6:32207181:SNP	cg26266427	Body	NM_019105	TNXB	Island	chr6	32063838	chr6:32207181:SNP	rs3130304	143343	-0.241714	0.0131901	5.183e-75	16305	A	G	0.2228	0.0182	TRUE	23	---?----?--?--?-----?-?-?????-?-?---	27.3	30.2449	0.1126	0.0015216	-0.239255	0.0159834	1.172e-50	0.0181333	1.552e-40	913	FALSE	1
	cg26266427-chr6:32728726:SNP	cg26266427	Body	NM_019105	TNXB	Island	chr6	32063838	chr6:32728726:SNP	rs9276582	664888	-0.140572	0.0127013	1.803e-28	20379	C	G	0.1875	0.0173	TRUE	26	---?----?-+?--?-----?---????--?-----	44.5	45.0652	0.008221	0.0034381	-0.149529	0.0181307	1.62e-16	0.0228955	8.266e-10	913	FALSE	1
	cg26266427-chr6:30032522:SNP	cg26266427	Body	NM_019105	TNXB	Island	chr6	32063838	chr6:30032522:SNP	rs8321		-0.190412	0.0165166	9.481e-31	17092	C	A	0.1251	0.0218	FALSE	24	+++?++++?++?++?+++++?-?-?????+?+++++	32.5	34.0723	0.06412	0.0032144	-0.180545	0.0212257	1.801e-17	0.0244678	7.131e-15	913	FALSE	1
	cg26266427-chr6:32437160:SNP	cg26266427	Body	NM_019105	TNXB	Island	chr6	32063838	chr6:32437160:SNP	rs28895235	373322	0.146448	0.0114997	0	17561	A	T	0.3324	0.0576	TRUE	23	+++?+++???+?++?+++++??+++???++??++-+	33.4	33.0272	0.06149	0.0015606	0.144089	0.0148807	3.563e-22	0.0172638	2.195e-17	913	FALSE	1
	cg26266427-chr6:32317859:SNP	cg26266427	Body	NM_019105	TNXB	Island	chr6	32063838	chr6:32317859:SNP	rs761189	254021	-0.194791	0.0108953	1.737e-71	17653	C	T	0.3867	0.04	TRUE	25	+++?++++?++?++?+++++?+?+????++?+++++	39.2	39.4943	0.02422	0.0019443	-0.194272	0.0146004	2.139e-40	0.0179292	1.703e-27	913	FALSE	1
	cg26266427-chr6:32276795:SNP	cg26266427	Body	NM_019105	TNXB	Island	chr6	32063838	chr6:32276795:SNP	rs9268190	212957	-0.201594	0.012392	1.661e-59	18140	T	C	0.2357	0.0233	TRUE	26	---?----?--?--?+----?-?--???--?-----	8.9	27.4402	0.3343	0.0003952	-0.2016	0.0131735	7.245e-53	0.0136015	1.065e-49	913	FALSE	1
	cg26266427-chr6:32577001:SNP	cg26266427	Body	NM_019105	TNXB	Island	chr6	32063838	chr6:32577001:SNP	rs659204	513163	-0.198379	0.0130818	0	13530	G	A	0.3189	0.042	TRUE	18	+++?+++?????++?+++++??+?????+???+?++	53.6	36.6209	0.003786	0.0037162	-0.200429	0.0208321	6.511e-22	0.0281805	1.928e-12	913	FALSE	1
	cg26266427-chr6:32600340:SNP	cg26266427	Body	NM_019105	TNXB	Island	chr6	32063838	chr6:32600340:SNP	rs28383330	536502	0.253331	0.0210082	1.746e-33	9538	G	A	0.1433	0.0256	TRUE	14	-???-?-?????--?-?-?-????-???-??--?--	40.7	21.9111	0.05675	0.0044062	0.249061	0.0291542	1.309e-17	0.0354087	8.399e-13	913	FALSE	1
	cg26266427-chr6:31320642:SNP	cg26266427	Body	NM_019105	TNXB	Island	chr6	32063838	chr6:31320642:SNP	rs2523615	743196	0.132033	0.0117947	4.349e-29	17805	T	C	0.2829	0.0299	TRUE	23	+++?-++???+?++?+++++??++????++?+++++	0	18.2904	0.6886	0	0.132033	0.0117947	4.349e-29	0.0117947	4.349e-29	913	FALSE	1
	cg26266427-chr6:32287402:SNP	cg26266427	Body	NM_019105	TNXB	Island	chr6	32063838	chr6:32287402:SNP	rs9268229	223564	-0.220525	0.0203657	2.53e-27	8119	A	C	0.1849	0.0204	TRUE	10	-???+??-?-??-??-?????-??????-??--???	27	12.3257	0.1956	0.0015998	-0.216551	0.0248811	3.219e-18	0.0278912	2.645e-15	913	FALSE	1
	cg26266427-chr6:31304727:SNP	cg26266427	Body	NM_019105	TNXB	Island	chr6	32063838	chr6:31304727:SNP	rs28752955	759111	-0.131968	0.0114176	0	15329	G	C	0.5206	0.0472	TRUE	20	+++?++????+?++?+++++??++????++???+++	0	18.3074	0.502	0	-0.131968	0.0114176	6.701e-31	0.0114176	6.701e-31	913	FALSE	1
	cg26266427-chr6:30820373:SNP	cg26266427	Body	NM_019105	TNXB	Island	chr6	32063838	chr6:30820373:SNP	rs2263298		-0.218062	0.0155605	0	17575	T	C	0.1399	0.0251	FALSE	25	---?----?--?--?-----?-?+????--?---+-	30.6	34.5722	0.075	0.0027188	-0.209118	0.0196963	2.48e-26	0.0224151	2.282e-22	913	FALSE	1
	cg26266427-chr6:31324516:SNP	cg26266427	Body	NM_019105	TNXB	Island	chr6	32063838	chr6:31324516:SNP	rs1131215	739322	-0.135094	0.0117114	8.76e-31	14796	C	A	0.4301	0.0419	TRUE	19	+++??+????+?++?+++++??++????++???+++	0	15.1914	0.6488	0	-0.135094	0.0117114	8.76e-31	0.0117114	8.76e-31	913	FALSE	1
	cg26266427-chr6:31311480:SNP	cg26266427	Body	NM_019105	TNXB	Island	chr6	32063838	chr6:31311480:SNP	rs9265832	752358	0.0936255	0.0113647	0	16185	G	A	0.4008	0.0285	TRUE	21	---?--????-?--?-----??--????--??+-+-	44.6	36.1265	0.01486	0.0022536	0.0971065	0.0163346	2.767e-09	0.0205284	5.096e-06	913	FALSE	1
	cg26266427-chr6:32608953:SNP	cg26266427	Body	NM_019105	TNXB	Island	chr6	32063838	chr6:32608953:SNP	rs9272682	545115	-0.235232	0.0149693	1.207e-55	11717	T	C	0.2488	0.0282	TRUE	14	-???-?-??-??--?---????-?????-???-?--	56.4	29.791	0.005047	0.0043056	-0.230905	0.0251089	3.711e-20	0.0343038	7.016e-12	913	FALSE	1
	cg26266427-chr6:32642719:SNP	cg26266427	Body	NM_019105	TNXB	Island	chr6	32063838	chr6:32642719:SNP	rs9275000	578881	0.138371	0.0205528	1.668e-11	7388	T	C	0.2054	0.0299	TRUE	11	+???+?+?????++?+?+??????????+???+?-+	10.8	11.2123	0.3412	0.0005931	0.134429	0.0223462	1.791e-09	0.0230443	1.918e-09	913	FALSE	1
	cg26266427-chr6:32336205:SNP	cg26266427	Body	NM_019105	TNXB	Island	chr6	32063838	chr6:32336205:SNP	rs3129935	272367	-0.2004	0.013464	4.177e-50	17655	G	A	0.1951	0.0193	TRUE	25	+++?-+++?++?++?+++++?+?+????++?+++++	18	29.2634	0.2104	0.001009	-0.200063	0.0152841	3.778e-39	0.0164167	2.85e-34	913	FALSE	1
	cg26266427-chr6:32025326:SNP	cg26266427	Body	NM_019105	TNXB	Island	chr6	32063838	chr6:32025326:SNP	rs2072628	38512	0.614311	0.0147789	0	24635	T	C	0.0989	0.0188	TRUE	31	+++++++++++?++++++++?++++???++++++++	51.7	62.1699	0.0004988	0.0073706	0.603318	0.0224058	1.06e-159	0.0306267	1.72e-89	913	FALSE	1
	cg26266427-chr6:31067232:SNP	cg26266427	Body	NM_019105	TNXB	Island	chr6	32063838	chr6:31067232:SNP	rs9263521	996606	-0.138765	0.0108475	0	18689	T	C	0.3401	0.0203	TRUE	25	---?---?-?-?--?-----?---????--?-+-+-	46.7	45.0277	0.005781	0.0026418	-0.139299	0.0157925	1.139e-18	0.0203516	9.205e-12	913	FALSE	1
	cg26266427-chr6:31312729:SNP	cg26266427	Body	NM_019105	TNXB	Island	chr6	32063838	chr6:31312729:SNP	rs2394979	751109	-0.326258	0.0145156	7.07e-112	19899	A	G	0.1391	0.0207	TRUE	25	---?-------?--?-----??--????--??----	20.5	30.1919	0.1785	0.0013952	-0.327818	0.0170708	3.466e-82	0.0182606	2.139e-71	913	FALSE	1
	cg26266427-chr6:31306609:SNP	cg26266427	Body	NM_019105	TNXB	Island	chr6	32063838	chr6:31306609:SNP	rs28752992	757229	-0.142059	0.0127519	7.989e-29	12264	G	C	0.5101	0.0406	TRUE	16	?++??++???+??+??++++??++?????+???+++	18.3	18.3487	0.2448	0.0006069	-0.143656	0.0147615	2.207e-22	0.0155987	8.461e-20	913	FALSE	1
	cg26266427-chr6:32583255:SNP	cg26266427	Body	NM_019105	TNXB	Island	chr6	32063838	chr6:32583255:SNP	rs13208475	519417	0.232491	0.0152617	2.115e-52	14289	T	C	0.1847	0.0269	TRUE	21	+++?++++?+??++?+++++???+????+??++?++	44.1	35.7706	0.01636	0.0039428	0.226878	0.0216042	8.498e-26	0.027296	1.632e-17	913	FALSE	1
	cg26266427-chr6:31721033:SNP	cg26266427	Body	NM_019105	TNXB	Island	chr6	32063838	chr6:31721033:SNP	rs3131379	342805	-0.429752	0.0137714	8.81e-214	24150	A	G	0.1246	0.0197	TRUE	30	-----------?--------?---????--------	25.4	38.8862	0.1039	0.0019766	-0.431574	0.0167506	2.21e-146	0.0184661	8.43e-120	913	FALSE	1
	cg26266427-chr6:29905437:SNP	cg26266427	Body	NM_019105	TNXB	Island	chr6	32063838	chr6:29905437:SNP	rs3098023		-0.199731	0.0188712	3.539e-26	12894	T	A	0.1275	0.0246	FALSE	19	+++??+????+?++?+++++???-????++??++-+	24.2	23.7381	0.1638	0.0022101	-0.194116	0.0226327	9.754e-18	0.024887	1.011e-15	913	FALSE	1
	cg26266427-chr6:30329926:SNP	cg26266427	Body	NM_019105	TNXB	Island	chr6	32063838	chr6:30329926:SNP	rs3094620		-0.203016	0.0161868	4.393e-36	17575	T	A	0.1262	0.0204	FALSE	25	+++?++++?++?++?+++++?+?-????++?+++-+	31.1	34.8496	0.07066	0.003017	-0.193547	0.0205377	4.343e-21	0.0235044	5.751e-18	913	FALSE	1
	cg26266427-chr6:30341390:SNP	cg26266427	Body	NM_019105	TNXB	Island	chr6	32063838	chr6:30341390:SNP	rs3130365		-0.20048	0.0160685	1.002e-35	17575	G	A	0.1275	0.0218	FALSE	25	+++?++++?++?++?+++++?+?-????++?+++-+	33.3	35.9846	0.05508	0.0032847	-0.191198	0.0207814	3.566e-20	0.0240925	8.704e-17	913	FALSE	1
	cg26266427-chr6:32749611:SNP	cg26266427	Body	NM_019105	TNXB	Island	chr6	32063838	chr6:32749611:SNP	rs9276673	685773	0.115236	0.0100251	1.402e-30	20738	G	T	0.3842	0.0303	TRUE	27	---?+------?--?-+---?----???--??----	19.9	32.454	0.1785	0.0006872	0.114015	0.0116384	1.166e-22	0.0125136	3.297e-20	913	FALSE	1
	cg26266427-chr6:32750416:INDEL	cg26266427	Body	NM_019105	TNXB	Island	chr6	32063838	chr6:32750416:INDEL	chr6:32750416:INDEL	686578	0.265987	0.0243105	7.32e-28	12265	I	D	0.0807	0.0133	TRUE	16	?--??--???-??-??+---??--?????-???-+-	31.5	21.9083	0.1102	0.0045752	0.250985	0.0315581	1.819e-15	0.0355067	6.827e-14	913	FALSE	1
	cg26266427-chr6:30596421:SNP	cg26266427	Body	NM_019105	TNXB	Island	chr6	32063838	chr6:30596421:SNP	rs9262126		-0.200049	0.0161595	0	16709	A	G	0.1358	0.0234	FALSE	24	---?--?-?--?--?-----?-?+????--?---+-	31.5	33.5641	0.07173	0.0029388	-0.191143	0.020637	2.004e-20	0.0235817	2.19e-17	913	FALSE	1
	cg26266427-chr6:32447653:SNP	cg26266427	Body	NM_019105	TNXB	Island	chr6	32063838	chr6:32447653:SNP	rs4457186	383815	0.131357	0.0122095	5.401e-27	13571	G	A	0.439	0.0454	TRUE	20	---?---???-?--?-----???-????-???----	20.6	23.9393	0.1985	0.0007906	0.132083	0.014156	1.053e-20	0.0153836	1.356e-17	913	FALSE	1
	cg26266427-chr6:31333095:SNP	cg26266427	Body	NM_019105	TNXB	Island	chr6	32063838	chr6:31333095:SNP	rs2428490	730743	-0.227646	0.0115719	3.727e-86	21449	A	G	0.2249	0.0275	TRUE	28	---?-------?--?-----?----???--?-----	40.5	45.4118	0.01471	0.0026148	-0.232043	0.0160004	1.171e-47	0.019463	1.331e-31	913	FALSE	1
	cg26266427-chr6:32585995:SNP	cg26266427	Body	NM_019105	TNXB	Island	chr6	32063838	chr6:32585995:SNP	rs28383269	522157	0.255602	0.0153502	2.958e-62	18094	C	T	0.1422	0.0268	TRUE	23	---?----?-??--?-----??--????-??-----	31.6	32.1715	0.07452	0.0025615	0.25104	0.0195547	1.006e-37	0.0224472	4.867e-30	913	FALSE	1
	cg26266427-chr6:31856600:SNP	cg26266427	Body	NM_019105	TNXB	Island	chr6	32063838	chr6:31856600:SNP	rs57393998	207238	0.473085	0.0295304	9.228e-58	20737	A	C	0.0307	0.0095	TRUE	28	++++++++++??++?+++++?++++???++?++++-	0	19.2005	0.8626	0	0.473085	0.0295304	9.228e-58	0.0295304	9.228e-58	913	FALSE	1
	cg26266427-chr6:31237771:SNP	cg26266427	Body	NM_019105	TNXB	Island	chr6	32063838	chr6:31237771:SNP	rs1050106	826067	-0.183073	0.0127845	1.644e-46	13090	G	A	0.3539	0.0292	TRUE	18	?++??+????+?++?+++++??++????++???+++	0	15.653	0.5486	0	-0.183073	0.0127845	1.644e-46	0.0127845	1.644e-46	913	FALSE	1
	cg26266427-chr6:32580596:SNP	cg26266427	Body	NM_019105	TNXB	Island	chr6	32063838	chr6:32580596:SNP	rs28383216	516758	0.26903	0.0141947	4.183e-80	20162	C	T	0.1479	0.0247	TRUE	26	---?------??--?------?--????--?-----	40	41.6875	0.01941	0.0035612	0.264794	0.0193523	1.286e-42	0.0236697	6.174e-30	913	FALSE	1
	cg26266427-chr6:32750675:SNP	cg26266427	Body	NM_019105	TNXB	Island	chr6	32063838	chr6:32750675:SNP	rs28893556	686837	0.226053	0.0186049	5.723e-34	21454	G	T	0.0769	0.0144	TRUE	28	---?-------?--?-+---?----???--?---+-	29.5	38.3102	0.07309	0.0041414	0.211945	0.023253	7.886e-20	0.0263984	1.098e-17	913	FALSE	1
	cg26266427-chr6:32952546:SNP	cg26266427	Body	NM_019105	TNXB	Island	chr6	32063838	chr6:32952546:SNP	rs206777	888708	0.080245	0.0099967	9.975e-16	20941	G	A	0.4019	0.016	TRUE	27	-----------?--?---+-?---?????-?-----	0	17.966	0.877	0	0.080245	0.0099967	9.975e-16	0.0099967	9.975e-16	913	FALSE	1
	cg26266427-chr6:31853808:SNP	cg26266427	Body	NM_019105	TNXB	Island	chr6	32063838	chr6:31853808:SNP	rs9501598	210030	0.472554	0.0295195	1.12e-57	20737	G	A	0.0307	0.0095	TRUE	28	----------??--?-----?----???--?----+	0	19.3279	0.8577	0	0.472554	0.0295195	1.12e-57	0.0295195	1.12e-57	913	FALSE	1
	cg26266427-chr6:32428062:SNP	cg26266427	Body	NM_019105	TNXB	Island	chr6	32063838	chr6:32428062:SNP	rs9268833	364224	0.138319	0.0109138	8.263e-37	20403	T	C	0.2985	0.0339	TRUE	26	+++?++++?++?++?+++++?++++????+?+++-+	7.6	27.0699	0.3524	0.0002612	0.137636	0.0115465	9.293e-33	0.0118174	1.206e-31	913	FALSE	1
	cg26266427-chr6:32325835:SNP	cg26266427	Body	NM_019105	TNXB	Island	chr6	32063838	chr6:32325835:SNP	rs2894249	261997	0.141381	0.0125569	0	17652	C	T	0.2372	0.0306	TRUE	25	---?----?--?--?-----?-?--????-?----+	19.8	29.9416	0.1867	0.0009892	0.13962	0.0144065	3.28e-22	0.0156655	1.797e-19	913	FALSE	1
	cg26266427-chr6:31640252:SNP	cg26266427	Body	NM_019105	TNXB	Island	chr6	32063838	chr6:31640252:SNP	rs805266	423586	0.35372	0.0292025	0	19489	T	C	0.035	0.0122	TRUE	25	+++?+-++++??++?+++++?++++????+?+++-?	16.1	28.6063	0.2353	0.0041437	0.347504	0.0325684	1.407e-26	0.0348072	2.923e-24	913	FALSE	1
	cg26266427-chr6:31353033:SNP	cg26266427	Body	NM_019105	TNXB	Island	chr6	32063838	chr6:31353033:SNP	rs2442747	710805	0.211356	0.0180551	1.185e-31	20898	T	C	0.0917	0.03	TRUE	27	+++?++++?++?++?+++++?++++???++?+++++	12.4	29.6935	0.2805	0.0012709	0.210671	0.0197525	1.476e-26	0.0206199	1.183e-24	913	FALSE	1
	cg26266427-chr6:31361200:INDEL	cg26266427	Body	NM_019105	TNXB	Island	chr6	32063838	chr6:31361200:INDEL	chr6:31361200:INDEL	702638	0.207604	0.0199308	2.09e-25	17431	D	I	0.0927	0.0321	TRUE	23	+++?+++???+?++?+++++?+++????++??++++	12	24.9998	0.2971	0.0012734	0.206152	0.021802	3.211e-21	0.0226485	4.892e-20	913	FALSE	1
	cg26266427-chr6:31365707:SNP	cg26266427	Body	NM_019105	TNXB	Island	chr6	32063838	chr6:31365707:SNP	rs2523457	698131	-0.132571	0.0104011	3.29e-37	20417	A	G	0.3317	0.0342	TRUE	26	---?----?-+?--?-----?----????-?-----	28.8	35.0988	0.08643	0.001161	-0.13632	0.0129715	7.838e-26	0.0146027	1.101e-19	913	FALSE	1
	cg26266427-chr6:32339647:SNP	cg26266427	Body	NM_019105	TNXB	Island	chr6	32063838	chr6:32339647:SNP	rs2050189	275809	-0.141202	0.0138484	2.06e-24	14985	C	T	0.2296	0.0213	TRUE	21	+++?+??+?++?++?-+-++?+?+?????+??++++	39.3	32.9432	0.03423	0.0026527	-0.140651	0.0186198	4.227e-14	0.0228104	6.008e-10	913	FALSE	1
	cg26266427-chr6:32276009:SNP	cg26266427	Body	NM_019105	TNXB	Island	chr6	32063838	chr6:32276009:SNP	rs9268181	212171	-0.201528	0.0123916	0	18141	C	T	0.2357	0.0233	TRUE	26	+++?++++?++?++?-++++?+?++???++?+++++	8.8	27.399	0.3363	0.0003885	-0.201533	0.0131605	6.217e-53	0.0135807	8.158e-50	913	FALSE	1
	cg26266427-chr6:32571113:INDEL	cg26266427	Body	NM_019105	TNXB	Island	chr6	32063838	chr6:32571113:INDEL	chr6:32571113:INDEL	507275	0.143673	0.0197747	0	6094	D	I	0.3088	0.0453	TRUE	8	+???+???+???+??+????+???????+???+???	8.2	7.62134	0.3672	0.0002954	0.141025	0.0210125	1.927e-11	0.02153	2.504e-11	913	FALSE	1
	cg26266427-chr6:32665285:SNP	cg26266427	Body	NM_019105	TNXB	Island	chr6	32063838	chr6:32665285:SNP	rs2856666	601447	-0.12646	0.0107774	8.552e-32	17654	G	T	0.4011	0.0262	TRUE	25	+++?++++?+-?+-?+++++?+?++????+?+++++	48.5	46.632	0.003714	0.002774	-0.127868	0.0156873	3.606e-16	0.0209404	1.551e-09	913	FALSE	1
	cg26266427-chr6:31249127:SNP	cg26266427	Body	NM_019105	TNXB	Island	chr6	32063838	chr6:31249127:SNP	rs2253487	814711	0.12717	0.0100999	2.362e-36	20408	A	G	0.3978	0.0185	TRUE	26	+++?++++?++?++?+-+++?+++????++?+++-+	0.8	25.1921	0.4516	2.08e-05	0.127183	0.0101583	5.796e-36	0.0101775	7.935e-36	913	FALSE	1
	cg26266427-chr6:32442711:SNP	cg26266427	Body	NM_019105	TNXB	Island	chr6	32063838	chr6:32442711:SNP	rs9269101	378873	-0.182015	0.0128409	0	15795	C	A	0.2669	0.0355	TRUE	22	+++?++++?++?++?+++++???+????+???++++	31.3	30.5627	0.08125	0.0016776	-0.179682	0.016086	5.713e-29	0.0186882	2.044e-22	913	FALSE	1
	cg26266427-chr6:31725285:SNP	cg26266427	Body	NM_019105	TNXB	Island	chr6	32063838	chr6:31725285:SNP	rs3131378	338553	-0.429464	0.0137651	1.09e-213	24150	G	A	0.1247	0.0198	TRUE	30	+++++++++++?++++++++?+++????++++++++	24.3	38.3045	0.1157	0.0018585	-0.431175	0.0165923	7.05e-149	0.0181816	2.36e-123	913	FALSE	1
	cg26266427-chr6:31244046:INDEL	cg26266427	Body	NM_019105	TNXB	Island	chr6	32063838	chr6:31244046:INDEL	chr6:31244046:INDEL	819792	-0.177167	0.0112237	0	17987	D	I	0.3198	0.0339	TRUE	24	---?---?-?-?--?-----?---????--??----	12.3	26.2289	0.2902	0.0004363	-0.176902	0.0123778	2.457e-46	0.0127993	1.424e-43	913	FALSE	1
	cg26266427-chr6:31236316:SNP	cg26266427	Body	NM_019105	TNXB	Island	chr6	32063838	chr6:31236316:SNP	rs2524098	827522	-0.176141	0.0106904	5.413e-61	19243	G	T	0.3383	0.0313	TRUE	25	+++?++?+-++?++?+++++?+++????++?+?+++	4	25.0034	0.4056	0.0001225	-0.176177	0.0110425	2.652e-57	0.0111373	2.44e-56	913	FALSE	1
	cg26266427-chr6:32747528:SNP	cg26266427	Body	NM_019105	TNXB	Island	chr6	32063838	chr6:32747528:SNP	rs2857193	683690	0.116514	0.0099667	1.43e-31	20975	G	A	0.3859	0.0283	TRUE	27	---?+------?--?-+---?----????-?-----	17.8	31.6365	0.2054	0.0005928	0.115409	0.0113791	3.587e-24	0.0121274	7.435e-22	913	FALSE	1
	cg26266427-chr6:31638178:SNP	cg26266427	Body	NM_019105	TNXB	Island	chr6	32063838	chr6:31638178:SNP	rs805268	425660	0.376204	0.0303313	2.513e-35	19229	C	A	0.033	0.0118	TRUE	25	-----+----??--?-----?----??????---+?	15.2	28.2947	0.2478	0.0041765	0.371538	0.0337157	3.069e-28	0.0357589	6.947e-26	913	FALSE	1
	cg26266427-chr6:31102672:SNP	cg26266427	Body	NM_019105	TNXB	Island	chr6	32063838	chr6:31102672:SNP	rs3130567	961166	0.160295	0.0096452	5.062e-62	24092	C	T	0.349	0.0348	TRUE	30	-----------?--------?---????------+-	34.1	43.9756	0.0369	0.0014631	0.161109	0.01243	2.027e-38	0.0146259	5.974e-28	913	FALSE	1
	cg26266427-chr6:32582796:SNP	cg26266427	Body	NM_019105	TNXB	Island	chr6	32063838	chr6:32582796:SNP	rs13204672	518958	0.268876	0.0143354	1.726e-78	19679	G	A	0.1489	0.0243	TRUE	25	---?------??--?------?--?????-?-----	42.1	41.4519	0.01485	0.0038063	0.264201	0.0199081	3.41e-40	0.0247596	1.797e-27	913	FALSE	1
	cg26266427-chr6:32743138:SNP	cg26266427	Body	NM_019105	TNXB	Island	chr6	32063838	chr6:32743138:SNP	rs12660504	679300	0.224639	0.0189044	1.453e-32	20969	A	G	0.0759	0.0137	TRUE	27	+++?+++++++?++?+-+++?++++????+?+++-+	30.5	37.4309	0.06832	0.0043295	0.21074	0.0238078	8.617e-19	0.0272158	1.532e-16	913	FALSE	1
	cg26266427-chr6:31325529:SNP	cg26266427	Body	NM_019105	TNXB	Island	chr6	32063838	chr6:31325529:SNP	rs9266239	738309	-0.146924	0.0111336	9.196e-40	17630	T	C	0.3412	0.0371	TRUE	23	---?---?+?-?--?-----??--????--??----	35.2	33.9727	0.04944	0.0015942	-0.144076	0.014679	9.697e-23	0.0171927	1.277e-17	913	FALSE	1
	cg26266427-chr6:32674558:SNP	cg26266427	Body	NM_019105	TNXB	Island	chr6	32063838	chr6:32674558:SNP	rs28371274	610720	0.254081	0.0172944	7.312e-49	17645	C	T	0.1114	0.0242	TRUE	25	---?----?--?--?-----?-?-????--?---+-	23.2	31.243	0.1469	0.0022962	0.25074	0.0204628	1.609e-34	0.0225138	1.546e-29	913	FALSE	1
	cg26266427-chr6:32438080:SNP	cg26266427	Body	NM_019105	TNXB	Island	chr6	32063838	chr6:32438080:SNP	rs9269040	374242	-0.172824	0.0166563	3.193e-25	9291	G	A	0.2695	0.0356	TRUE	15	?++?+++???+??+??++++???+?????????+++	31.7	20.5044	0.115	0.0019796	-0.173199	0.0209871	1.549e-16	0.0243948	1.396e-12	913	FALSE	1
	cg26266427-chr6:31761213:SNP	cg26266427	Body	NM_019105	TNXB	Island	chr6	32063838	chr6:31761213:SNP	rs2607014	302625	-0.43342	0.0140047	2.68e-210	23264	A	G	0.125	0.0199	TRUE	29	------?----?--------?---????--------	25.9	37.7782	0.1027	0.0020276	-0.435764	0.017134	1.1e-142	0.0188954	1.95e-116	913	FALSE	1
	cg26266427-chr6:30706361:SNP	cg26266427	Body	NM_019105	TNXB	Island	chr6	32063838	chr6:30706361:SNP	rs3130660		-0.194598	0.0155761	8.116e-36	17571	A	T	0.1379	0.0234	FALSE	25	---?----?--?--?-----?-?+????--?---+-	37	38.0893	0.03395	0.0036281	-0.185326	0.0208043	5.193e-19	0.0247201	3.489e-15	913	FALSE	1
	cg26266427-chr6:32391516:SNP	cg26266427	Body	NM_019105	TNXB	Island	chr6	32063838	chr6:32391516:SNP	rs3135356	327678	-0.238915	0.0139554	1.055e-65	17166	A	G	0.1849	0.0209	TRUE	24	---?----?--?--?-----?-?-?????-?-----	44.7	41.6261	0.01003	0.0038432	-0.24149	0.019724	1.822e-34	0.0252569	3.097e-21	913	FALSE	1
	cg26266427-chr6:30652781:SNP	cg26266427	Body	NM_019105	TNXB	Island	chr6	32063838	chr6:30652781:SNP	rs9262143		-0.19899	0.0159106	6.851e-36	17092	T	C	0.1361	0.0229	FALSE	24	---?----?--?--?-----?-?+?????-?---+-	30.3	32.9911	0.08122	0.0026911	-0.190874	0.0200713	1.911e-21	0.022822	2.801e-18	913	FALSE	1
	cg26266427-chr6:32667762:SNP	cg26266427	Body	NM_019105	TNXB	Island	chr6	32063838	chr6:32667762:SNP	rs2856723	603924	-0.133139	0.0106182	4.582e-36	18128	A	G	0.3994	0.0283	TRUE	26	---?----?-+?-+?-----?-?--???--?-----	49	48.9731	0.002846	0.0028462	-0.135485	0.0155107	2.438e-18	0.0208003	1.545e-10	913	FALSE	1
	cg26266427-chr6:32408735:SNP	cg26266427	Body	NM_019105	TNXB	Island	chr6	32063838	chr6:32408735:SNP	rs3129878	344897	-0.135523	0.0116623	3.24e-31	17169	C	A	0.3242	0.0297	TRUE	24	+++?-+++?++?++?+++++?+?+?????+?+++++	49.3	45.3236	0.003627	0.0032166	-0.132782	0.0171833	1.098e-14	0.0229816	3.702e-09	913	FALSE	1
	cg26266427-chr6:32596951:SNP	cg26266427	Body	NM_019105	TNXB	Island	chr6	32063838	chr6:32596951:SNP	rs77108330	533113	-0.278739	0.0142365	2.326e-85	13602	C	T	0.2287	0.0235	TRUE	19	+++?+?++?++?++?+++++????????+???+?++	49.1	35.3877	0.008445	0.0037928	-0.276087	0.0209885	1.61e-39	0.0279887	2.304e-23	913	FALSE	1
	cg26266427-chr6:32568284:SNP	cg26266427	Body	NM_019105	TNXB	Island	chr6	32063838	chr6:32568284:SNP	rs9270746	504446	-0.204459	0.0164059	1.196e-35	8310	T	C	0.331	0.0311	TRUE	13	---???-?????--?---??????????-???-?--	52.2	25.1239	0.01425	0.0039804	-0.20062	0.0254785	3.432e-15	0.0343484	2.641e-09	913	FALSE	1
	cg26266427-chr6:32589245:SNP	cg26266427	Body	NM_019105	TNXB	Island	chr6	32063838	chr6:32589245:SNP	rs9271497	525407	0.154673	0.0156432	4.714e-23	9769	T	A	0.3199	0.0453	TRUE	13	?--???-??????-??----??--?????????-+-	11.1	13.4979	0.3339	0.0004213	0.153948	0.0172036	3.6e-19	0.0175959	1.492e-18	913	FALSE	1
	cg26266427-chr6:32161852:SNP	cg26266427	Body	NM_019105	TNXB	Island	chr6	32063838	chr6:32161852:SNP	rs204989	98014	-0.220144	0.0121835	0	20410	A	G	0.2051	0.0219	TRUE	26	---?----?--?--?-----?----????-?-----	15	29.4239	0.2466	0.0006977	-0.221301	0.0136504	4.142e-59	0.0143394	3.415e-53	913	FALSE	1
	cg26266427-chr6:32339761:SNP	cg26266427	Body	NM_019105	TNXB	Island	chr6	32063838	chr6:32339761:SNP	rs115347370	275923	0.450593	0.0576115	5.23e-15	10034	A	G	0.0159	0.0042	TRUE	13	+?+?++?+???????-?+++?+???????+??++??	44	21.4121	0.04466	0.0343237	0.454151	0.0786984	7.89e-09	0.102799	1.169e-05	913	FALSE	1
	cg26266427-chr6:32435584:SNP	cg26266427	Body	NM_019105	TNXB	Island	chr6	32063838	chr6:32435584:SNP	rs9268990	371746	-0.161734	0.0147654	6.391e-28	12051	T	C	0.2607	0.0368	TRUE	19	?--?+--???-?--?-----???-?????-??----	28.3	25.0973	0.1223	0.0016603	-0.161418	0.0180242	3.378e-19	0.0205874	3.967e-15	913	FALSE	1
	cg26266427-chr6:32018410:SNP	cg26266427	Body	NM_019105	TNXB	Island	chr6	32063838	chr6:32018410:SNP	rs113337959	45428	0.478997	0.0344166	4.95e-44	21745	A	G	0.0218	0.0064	TRUE	27	++++++?+++??++++++++??++????-++++++-	20	32.5085	0.1768	0.0081128	0.474961	0.0396163	4.056e-33	0.0430319	8.842e-29	913	FALSE	1
	cg26266427-chr6:32193219:SNP	cg26266427	Body	NM_019105	TNXB	Island	chr6	32063838	chr6:32193219:SNP	rs3130295	129381	-0.223584	0.0126643	9.379e-70	17147	T	C	0.2326	0.02	TRUE	24	---?----?--?--?-----?-?-?????-?-----	48.3	44.4635	0.004621	0.0036383	-0.218746	0.0183575	9.778e-33	0.0244826	6.703e-20	913	FALSE	1
	cg26266427-chr6:32420801:SNP	cg26266427	Body	NM_019105	TNXB	Island	chr6	32063838	chr6:32420801:SNP	rs3135383	356963	0.389542	0.0264275	0	7124	T	G	0.8823	0.0196	TRUE	8	+???+?+??+??+??+????????????+???+???	17.5	8.48956	0.2914	0.0012571	0.388993	0.0300979	3.286e-38	0.0320512	5.478e-34	913	FALSE	1
	cg26266427-chr6:32446518:SNP	cg26266427	Body	NM_019105	TNXB	Island	chr6	32063838	chr6:32446518:SNP	rs9269158	382680	-0.1855	0.0164368	1.545e-29	9512	T	C	0.272	0.036	TRUE	15	?--??--???-??-??----???-???????-?---	33.6	21.0871	0.09942	0.002098	-0.186858	0.0210033	5.758e-19	0.0247575	6.749e-14	913	FALSE	1
	cg26266427-chr6:32077690:SNP	cg26266427	Body	NM_019105	TNXB	Island	chr6	32063838	chr6:32077690:SNP	rs114775987	13852	0.49481	0.0303447	8.901e-60	21416	A	G	0.0272	0.0068	TRUE	28	+++++++++++?++?+-+++?+++????++?+++++	0	23.7372	0.6449	0	0.49481	0.0303447	8.901e-60	0.0303447	8.901e-60	913	FALSE	1
	cg26266427-chr6:32588501:SNP	cg26266427	Body	NM_019105	TNXB	Island	chr6	32063838	chr6:32588501:SNP	rs9271462	524663	-0.220907	0.0123414	1.187e-71	16357	C	T	0.2809	0.0387	TRUE	20	+++?+?++?++?++?+++++??+?????+???+?++	61.1	48.8725	0.0001917	0.0049464	-0.217097	0.0212637	1.793e-24	0.031745	3.432e-12	913	FALSE	1
	cg26266427-chr6:31323953:SNP	cg26266427	Body	NM_019105	TNXB	Island	chr6	32063838	chr6:31323953:SNP	rs1131285	739885	-0.176331	0.0114445	1.458e-53	16518	C	G	0.356	0.0395	TRUE	21	---??--???-?--?-----??--????--??----	8.6	21.8811	0.347	0.0002667	-0.176789	0.0122564	3.644e-47	0.0125209	4.836e-45	913	FALSE	1
	cg26266427-chr6:32746394:SNP	cg26266427	Body	NM_019105	TNXB	Island	chr6	32063838	chr6:32746394:SNP	rs201402353	682556	0.250244	0.0241606	3.868e-25	12753	T	C	0.0783	0.0127	TRUE	17	?++??++???+??+??-+++??+++????+???+-+	39.2	26.3083	0.04984	0.006701	0.23022	0.0334533	5.908e-12	0.0397264	2.992e-10	913	FALSE	1
	cg26266427-chr6:31329374:SNP	cg26266427	Body	NM_019105	TNXB	Island	chr6	32063838	chr6:31329374:SNP	rs2596545	734464	-0.34454	0.0141686	1.29e-130	21413	C	A	0.1364	0.0218	TRUE	28	+++++++++++?++?+++++?+++????++?+++++	20.6	34.0082	0.1658	0.0014954	-0.346917	0.0167	7.53e-96	0.0178463	4.781e-83	913	FALSE	1
	cg26266427-chr6:31196554:SNP	cg26266427	Body	NM_019105	TNXB	Island	chr6	32063838	chr6:31196554:SNP	rs1639108	867284	-0.313169	0.0143893	5.09e-105	20186	C	T	0.1428	0.0241	TRUE	26	+++?+++?+++?++?+++++?+++????++?+++++	24.3	33.0237	0.1305	0.0017737	-0.312954	0.0174787	1.081e-71	0.0190075	5.45e-61	913	FALSE	1
	cg26266427-chr6:32343369:SNP	cg26266427	Body	NM_019105	TNXB	Island	chr6	32063838	chr6:32343369:SNP	rs3117106	279531	-0.264686	0.015127	1.496e-68	16784	C	T	0.155	0.0196	TRUE	24	+++?++?+?++?++?+++++?+?+????++?+++++	56.2	52.5476	0.000422	0.0071589	-0.261462	0.0240324	1.442e-27	0.0345604	1.879e-14	913	FALSE	1
	cg26266427-chr6:32584440:SNP	cg26266427	Body	NM_019105	TNXB	Island	chr6	32063838	chr6:32584440:SNP	rs2647092	520602	-0.259717	0.0119497	0	17927	T	C	0.252	0.0225	TRUE	23	---?----?-??--?-----??---???-???----	43.2	38.7066	0.01524	0.0025602	-0.259696	0.0168584	1.526e-53	0.0210242	4.678e-35	913	FALSE	1
	cg26266427-chr6:32561390:SNP	cg26266427	Body	NM_019105	TNXB	Island	chr6	32063838	chr6:32561390:SNP	rs9270589	497552	-0.12005	0.0131119	5.396e-20	12077	T	C	0.4082	0.0387	TRUE	16	---?-?-??--?--?+?-??????????-??--?--	28.3	20.9133	0.1396	0.0011078	-0.119492	0.0160483	9.636e-14	0.0182808	5.135e-11	913	FALSE	1
	cg26266427-chr6:32225072:SNP	cg26266427	Body	NM_019105	TNXB	Island	chr6	32063838	chr6:32225072:SNP	rs9268017	161234	-0.191329	0.0122477	5.187e-55	18136	G	T	0.2429	0.0229	TRUE	26	+++?++++?++?++?-++++?+?++???++?+++++	20.2	31.3087	0.179	0.000998	-0.191327	0.0141074	6.719e-42	0.0153384	1.037e-35	913	FALSE	1
	cg26266427-chr6:32651557:SNP	cg26266427	Body	NM_019105	TNXB	Island	chr6	32063838	chr6:32651557:SNP	rs9275147	587719	0.127379	0.0128391	3.369e-23	16573	T	C	0.2407	0.0161	TRUE	23	+++?++++?+-?++?+++++???+????++??++-+	42	37.9504	0.01856	0.0027915	0.124434	0.0176436	1.756e-12	0.0221477	8.854e-09	913	FALSE	1
	cg26266427-chr6:32415522:SNP	cg26266427	Body	NM_019105	TNXB	Island	chr6	32063838	chr6:32415522:SNP	rs9268686	351684	-0.155088	0.0111922	1.156e-43	16564	C	T	0.4157	0.037	TRUE	24	+++?++++?++?++?++?++?+?+????++?+++++	12.8	26.388	0.2829	0.0004494	-0.155314	0.0122248	5.561e-37	0.0128408	1.385e-33	913	FALSE	1
	cg26266427-chr6:32760714:SNP	cg26266427	Body	NM_019105	TNXB	Island	chr6	32063838	chr6:32760714:SNP	rs2157082	696876	0.1091	0.0099452	0	20482	G	T	0.4344	0.0379	TRUE	26	---?+------?--?++-+-?---?????-?-----	24.2	32.9971	0.1311	0.0008386	0.107909	0.0119063	1.266e-19	0.0131266	9.456e-17	913	FALSE	1
	cg26266427-chr6:32271443:SNP	cg26266427	Body	NM_019105	TNXB	Island	chr6	32063838	chr6:32271443:SNP	rs7742654	207605	-0.201528	0.0123916	1.798e-59	18141	G	C	0.2357	0.0233	TRUE	26	+++?++++?++?++?-++++?+?++???++?+++++	8.8	27.399	0.3363	0.0003885	-0.201533	0.0131605	6.217e-53	0.0135807	8.158e-50	913	FALSE	1
	cg26266427-chr6:31606398:SNP	cg26266427	Body	NM_019105	TNXB	Island	chr6	32063838	chr6:31606398:SNP	rs3130046	457440	-0.269177	0.0122104	1.07e-107	21427	G	C	0.1959	0.02	TRUE	28	+++++++++++?++?+++++?+++????++?+++++	33.5	40.5907	0.04507	0.0021482	-0.272266	0.0158349	2.944e-66	0.0183567	1.101e-48	913	FALSE	1
	cg26266427-chr6:30234945:SNP	cg26266427	Body	NM_019105	TNXB	Island	chr6	32063838	chr6:30234945:SNP	rs3129836		-0.153096	0.0144147	2.385e-26	17086	G	A	0.1643	0.0219	FALSE	24	+++?++++?++?++?+++++?-?-?????+?+++-+	32.3	33.97	0.06559	0.0024187	-0.145209	0.0183271	2.315e-15	0.0212899	6.431e-13	913	FALSE	1
	cg26266427-chr6:32779939:INDEL	cg26266427	Body	NM_019105	TNXB	Island	chr6	32063838	chr6:32779939:INDEL	chr6:32779939:INDEL	716101	0.124795	0.0106507	1.042e-31	20308	D	I	0.3129	0.0358	TRUE	26	++++++??-?+?++++++++?+++????+++?++++	25.1	33.3795	0.1219	0.0010105	0.12437	0.0128996	5.345e-22	0.0142206	1.699e-18	913	FALSE	1
	cg26266427-chr6:32654257:SNP	cg26266427	Body	NM_019105	TNXB	Island	chr6	32063838	chr6:32654257:SNP	rs28371253	590419	0.246127	0.0177808	1.417e-43	16570	T	C	0.1118	0.0241	TRUE	23	+++?++++?++?++?+++++???+????++??++-+	6.7	23.5765	0.3698	0.0005309	0.244999	0.0186503	2.034e-39	0.0190549	3.624e-38	913	FALSE	1
	cg26266427-chr6:32760445:SNP	cg26266427	Body	NM_019105	TNXB	Island	chr6	32063838	chr6:32760445:SNP	rs2621382	696607	0.108957	0.0097261	3.962e-29	21456	G	T	0.433	0.0381	TRUE	28	---?+------?--?++-+-?----???--?-----	22.8	34.992	0.1391	0.0007983	0.10769	0.0115167	8.701e-21	0.012605	5.431e-18	913	FALSE	1
	cg26266427-chr6:32560963:SNP	cg26266427	Body	NM_019105	TNXB	Island	chr6	32063838	chr6:32560963:SNP	rs28366303	497125	0.125784	0.0122041	6.573e-25	15552	G	C	0.3236	0.0457	TRUE	22	-??--------?--?-----???-????-???--+-	5.2	22.1614	0.3903	0.0001848	0.125538	0.0126734	3.935e-23	0.0128791	1.567e-22	913	FALSE	1
	cg26266427-chr6:31074750:SNP	cg26266427	Body	NM_019105	TNXB	Island	chr6	32063838	chr6:31074750:SNP	rs2844636	989088	-0.149921	0.0094404	8.603e-57	24631	A	C	0.3435	0.0247	TRUE	31	-----------?---+----?----???------+-	40.6	50.481	0.01105	0.0019178	-0.149679	0.0129089	4.369e-31	0.0158853	3.81e-21	913	FALSE	1
	cg26266427-chr6:31315706:SNP	cg26266427	Body	NM_019105	TNXB	Island	chr6	32063838	chr6:31315706:SNP	rs9265969	748132	-0.299506	0.0134985	4.47e-109	20620	A	G	0.1567	0.0197	TRUE	26	---?-------?--?-----??--????--?-----	21.2	31.7154	0.1664	0.0013029	-0.301889	0.015902	2.296e-80	0.0171244	1.708e-68	913	FALSE	1
	cg26266427-chr6:32368462:SNP	cg26266427	Body	NM_019105	TNXB	Island	chr6	32063838	chr6:32368462:SNP	rs3129956	304624	-0.39924	0.0164425	3.12e-130	17645	A	G	0.1239	0.0229	TRUE	25	---?----?--?--?-----?-?-????--?-----	39.3	39.5404	0.02395	0.004454	-0.400958	0.0222876	2.327e-72	0.0270894	3.682e-49	913	FALSE	1
	cg26266427-chr6:32295431:INDEL	cg26266427	Body	NM_019105	TNXB	Island	chr6	32063838	chr6:32295431:INDEL	chr6:32295431:INDEL	231593	-0.273355	0.019185	4.589e-46	8643	I	D	0.1933	0.0201	TRUE	14	?++??+????+??+??++++???+?????+???+++	52.9	27.5977	0.01029	0.005927	-0.283736	0.0294868	6.425e-22	0.0407278	1.923e-11	913	FALSE	1
	cg26266427-chr6:31897298:SNP	cg26266427	Body	NM_019105	TNXB	Island	chr6	32063838	chr6:31897298:SNP	rs9332708	166540	0.497551	0.0312933	6.376e-57	22131	T	C	0.0323	0.0224	TRUE	28	+++++++?+++?++?+++++?++++????+++++++	0	23.8156	0.6405	0	0.497551	0.0312933	6.376e-57	0.0312933	6.376e-57	913	FALSE	1
	cg26266427-chr6:32589668:SNP	cg26266427	Body	NM_019105	TNXB	Island	chr6	32063838	chr6:32589668:SNP	rs9271516	525830	0.14397	0.0124367	5.44e-31	15192	A	C	0.324	0.0413	TRUE	20	+++?+++?????++?+++++??++????+???++-+	13.7	22.004	0.2841	0.0005044	0.142041	0.0138484	1.103e-24	0.0144031	1.59e-23	913	FALSE	1
	cg26266427-chr6:32651404:SNP	cg26266427	Body	NM_019105	TNXB	Island	chr6	32063838	chr6:32651404:SNP	rs3021175	587566	0.261521	0.0181333	0	15902	C	T	0.11	0.0209	TRUE	23	---?----?-??--?-----???--???--??--+-	17.4	26.6264	0.2258	0.0016228	0.259194	0.0205941	2.527e-36	0.0219465	9.737e-33	913	FALSE	1
	cg26266427-chr6:32590771:SNP	cg26266427	Body	NM_019105	TNXB	Island	chr6	32063838	chr6:32590771:SNP	rs2097432	526933	-0.28342	0.0118374	0	19325	C	T	0.2319	0.0224	TRUE	24	+++?+?++?++?++?+++++?+++?????+?+++++	45.4	42.1227	0.008784	0.0028619	-0.285891	0.0169814	1.339e-63	0.0216792	4.676e-39	913	FALSE	1
	cg26266427-chr6:31725230:SNP	cg26266427	Body	NM_019105	TNXB	Island	chr6	32063838	chr6:31725230:SNP	rs3117574	338608	-0.429451	0.0137642	1.05e-213	24150	A	G	0.1247	0.0197	TRUE	30	-----------?--------?---????--------	24.2	38.2833	0.1162	0.001854	-0.431153	0.0165851	5.44e-149	0.0181703	1.69e-123	913	FALSE	1
	cg26266427-chr6:32316312:SNP	cg26266427	Body	NM_019105	TNXB	Island	chr6	32063838	chr6:32316312:SNP	rs969892	252474	-0.21184	0.0124747	1.124e-64	17641	C	T	0.2358	0.0207	TRUE	25	+++?++++?++?++?+++++?+?+????++?+++++	23.8	31.5089	0.1396	0.0012351	-0.212053	0.0147683	9.409e-47	0.0163776	2.868e-38	913	FALSE	1
	cg26266427-chr6:31729925:SNP	cg26266427	Body	NM_019105	TNXB	Island	chr6	32063838	chr6:31729925:SNP	rs1802127	333913	0.383391	0.0405106	2.965e-21	16109	T	C	0.0252	0.0153	TRUE	22	++++++?+++??++?+?+++?+?-+????+?+++??	29.1	29.6024	0.1003	0.0149196	0.379961	0.0490448	9.392e-15	0.0571054	1.897e-11	913	FALSE	1
	cg26266427-chr6:32774792:SNP	cg26266427	Body	NM_019105	TNXB	Island	chr6	32063838	chr6:32774792:SNP	rs2857140	710954	0.117558	0.009705	8.991e-34	24641	A	G	0.3077	0.0357	TRUE	31	++++++++-++?++++++++?+++-???++++++++	26.5	40.8038	0.09021	0.0010686	0.116027	0.0118129	9.052e-23	0.0132	5.294e-19	913	FALSE	1
	cg26266427-chr6:31818108:SNP	cg26266427	Body	NM_019105	TNXB	Island	chr6	32063838	chr6:31818108:SNP	rs9267578	245730	-0.440249	0.0144829	0	22356	T	C	0.1216	0.0196	TRUE	28	------?----?-------??---????--------	28.5	37.7464	0.08196	0.0023922	-0.443673	0.0181528	6.27e-132	0.0202474	7.96e-105	913	FALSE	1
	cg26266427-chr6:31067550:SNP	cg26266427	Body	NM_019105	TNXB	Island	chr6	32063838	chr6:31067550:SNP	rs4371876	996288	-0.132927	0.0107195	2.599e-35	18687	A	G	0.356	0.0264	TRUE	25	---?---?-?-?--?-----?---????--?---+-	41.9	41.3064	0.01541	0.0021218	-0.134783	0.0149115	1.583e-19	0.0184494	5.807e-13	913	FALSE	1
	cg26266427-chr6:32585978:SNP	cg26266427	Body	NM_019105	TNXB	Island	chr6	32063838	chr6:32585978:SNP	rs28383267	522140	0.263275	0.0156073	7.654e-64	17392	G	A	0.1431	0.0272	TRUE	22	---?----?-??--?-----??--????-???----	30.8	30.3337	0.08548	0.0024411	0.258418	0.0198159	7.152e-39	0.0225442	1.649e-31	913	FALSE	1
	cg26266427-chr6:31476854:SNP	cg26266427	Body	NM_019105	TNXB	Island	chr6	32063838	chr6:31476854:SNP	rs2844498	586984	0.133448	0.0091853	0	24642	T	C	0.4187	0.0319	TRUE	31	+++-+++++++?++++++++?++++???++++++++	34.9	46.1025	0.03038	0.0014248	0.133844	0.0119328	3.384e-29	0.0141155	3.262e-21	913	FALSE	1
	cg26266427-chr6:31795550:SNP	cg26266427	Body	NM_019105	TNXB	Island	chr6	32063838	chr6:31795550:SNP	rs6457452	268288	0.320199	0.021003	1.766e-52	20080	T	C	0.061	0.0153	TRUE	26	+++-++?++++?++?+++++?+++?????+?+++-+	15.4	29.5656	0.241	0.0021352	0.317521	0.0235162	1.517e-41	0.0248386	5.046e-38	913	FALSE	1
	cg26266427-chr6:32780724:SNP	cg26266427	Body	NM_019105	TNXB	Island	chr6	32063838	chr6:32780724:SNP	rs11244	716886	-0.193822	0.0101447	2.26e-81	24150	A	G	0.2713	0.028	TRUE	30	-----------?--------?---????--------	38.8	47.4179	0.01688	0.001995	-0.194215	0.0137005	1.294e-45	0.0165875	1.525e-31	913	FALSE	1
	cg26266427-chr6:32312650:SNP	cg26266427	Body	NM_019105	TNXB	Island	chr6	32063838	chr6:32312650:SNP	rs4576281	248812	-0.186918	0.0150889	3.043e-35	9304	C	G	0.3755	0.0242	TRUE	13	-???-??-?-??-??----??-??????-???-??-	26.1	16.2453	0.1803	0.0010889	-0.183763	0.0184122	1.855e-23	0.0204269	5.663e-20	913	FALSE	1
	cg26266427-chr6:32385605:SNP	cg26266427	Body	NM_019105	TNXB	Island	chr6	32063838	chr6:32385605:SNP	rs3135374	321767	-0.238161	0.0138507	2.898e-66	17169	A	C	0.1869	0.0211	TRUE	24	---?----?--?--?-----?-?-?????-?-----	45.2	41.9784	0.009131	0.0038567	-0.24157	0.0196635	1.088e-34	0.0252795	4.463e-21	913	FALSE	1
	cg26266427-chr6:32659520:SNP	cg26266427	Body	NM_019105	TNXB	Island	chr6	32063838	chr6:32659520:SNP	rs10456069	595682	0.250124	0.0172143	0	18138	T	C	0.109	0.0228	TRUE	26	+++?++++?++?++?+++++?+?++???++?+++-+	17.6	30.3322	0.2121	0.001671	0.247159	0.0195331	1.072e-36	0.020886	4.764e-33	913	FALSE	1
	cg26266427-chr6:31094703:SNP	cg26266427	Body	NM_019105	TNXB	Island	chr6	32063838	chr6:31094703:SNP	rs3130557	969135	-0.322243	0.013166	0	24150	T	C	0.1421	0.0239	TRUE	30	-----------?--------?---????--------	25.9	39.1512	0.0988	0.001857	-0.323438	0.0161167	1.39e-89	0.0177746	1.866e-73	913	FALSE	1
	cg26266427-chr6:32589952:SNP	cg26266427	Body	NM_019105	TNXB	Island	chr6	32063838	chr6:32589952:SNP	rs9271533	526114	-0.146581	0.0141238	3.114e-25	10946	T	G	0.3531	0.0434	TRUE	14	?--???-???-??-??----??--?????????---	34.7	19.922	0.09717	0.0015754	-0.151754	0.018922	1.057e-15	0.0216442	1.268e-11	913	FALSE	1
	cg26266427-chr6:31337780:SNP	cg26266427	Body	NM_019105	TNXB	Island	chr6	32063838	chr6:31337780:SNP	rs2523529	726058	0.205965	0.0184948	0	20032	G	C	0.0916	0.031	TRUE	26	---?--?-?--?--?-----?----???--?-----	18.6	30.7126	0.1987	0.0020684	0.204909	0.0212038	4.295e-22	0.0227209	1.246e-19	913	FALSE	1
	cg26266427-chr6:32608704:SNP	cg26266427	Body	NM_019105	TNXB	Island	chr6	32063838	chr6:32608704:SNP	rs9272663	544866	-0.219758	0.0194988	1.839e-29	6555	G	A	0.2764	0.0335	TRUE	10	+???+???????++?+?+??????????+???+?++	51.7	18.6499	0.02834	0.0043095	-0.220592	0.0302875	3.258e-13	0.0404056	5.364e-08	913	FALSE	1
	cg26266427-chr6:31452090:SNP	cg26266427	Body	NM_019105	TNXB	Island	chr6	32063838	chr6:31452090:SNP	rs28405701	611748	-0.1614	0.0105541	8.56e-53	20932	A	G	0.3052	0.0214	TRUE	27	---?-------?--?-----?---????--?-----	47	49.0152	0.004113	0.002716	-0.166304	0.0153397	2.191e-27	0.0198966	4.981e-16	913	FALSE	1
	cg26266427-chr6:32224489:SNP	cg26266427	Body	NM_019105	TNXB	Island	chr6	32063838	chr6:32224489:SNP	rs6908927	160651	-0.18529	0.0124027	0	17650	A	G	0.2443	0.0225	TRUE	25	---?----?--?--?+----?-?-????--?-----	5.3	25.3397	0.3875	0.0002178	-0.185089	0.0128601	5.769e-47	0.0130951	1.878e-45	913	FALSE	1
	cg26266427-chr6:30337141:SNP	cg26266427	Body	NM_019105	TNXB	Island	chr6	32063838	chr6:30337141:SNP	rs3129810		-0.202809	0.0161894	5.294e-36	17575	T	G	0.1262	0.0204	FALSE	25	---?----?--?--?-----?-?+????--?---+-	30.9	34.7339	0.07244	0.0029858	-0.193316	0.0205022	4.139e-21	0.02343	4.889e-18	913	FALSE	1
	cg26266427-chr6:32580999:SNP	cg26266427	Body	NM_019105	TNXB	Island	chr6	32063838	chr6:32580999:SNP	rs12205706	517161	0.262631	0.0200992	5.098e-39	10370	T	C	0.1462	0.0255	TRUE	14	?++??++??????+??++++??++?????????+++	30.8	18.7959	0.1296	0.002643	0.259099	0.0258723	1.316e-23	0.0290602	1.603e-19	913	FALSE	1
	cg26266427-chr6:32447709:SNP	cg26266427	Body	NM_019105	TNXB	Island	chr6	32063838	chr6:32447709:SNP	rs2395193	383871	-0.172547	0.01375	4.032e-36	13610	G	A	0.271	0.0364	TRUE	20	+++?+++???+?++?+++++???+????+???++++	28.2	26.46	0.1179	0.0015121	-0.16991	0.0168455	6.348e-24	0.0191487	2.044e-19	913	FALSE	1
	cg26266427-chr6:32307446:SNP	cg26266427	Body	NM_019105	TNXB	Island	chr6	32063838	chr6:32307446:SNP	rs3132944	243608	0.136694	0.0124054	3.098e-28	18140	T	C	0.2364	0.0312	TRUE	26	+++?++++?++?++?+++++?+?++???-+?++++-	27.6	34.5096	0.09746	0.0015424	0.133608	0.0150822	8.101e-19	0.0171242	1.434e-15	913	FALSE	1
	cg26266427-chr6:32452361:SNP	cg26266427	Body	NM_019105	TNXB	Island	chr6	32063838	chr6:32452361:SNP	rs71543453	388523	0.136623	0.0121445	2.321e-29	13608	T	C	0.4525	0.035	TRUE	20	+++?+++???+?++?+++++???+????+???++++	21.3	24.1497	0.1905	0.0008152	0.136937	0.0141435	3.597e-22	0.0154361	8.683e-19	913	FALSE	1
	cg26266427-chr6:32273487:SNP	cg26266427	Body	NM_019105	TNXB	Island	chr6	32063838	chr6:32273487:SNP	rs7341270	209649	-0.196898	0.0125528	1.897e-55	17654	A	G	0.2368	0.0229	TRUE	25	---?----?--?--?+----?-?-????--?-----	0	22.4614	0.5518	0	-0.196898	0.0125528	1.897e-55	0.0125528	1.897e-55	913	FALSE	1
	cg26266427-chr6:32745886:SNP	cg26266427	Body	NM_019105	TNXB	Island	chr6	32063838	chr6:32745886:SNP	rs4265062	682048	-0.165873	0.0100263	1.773e-61	21454	A	G	0.3438	0.0246	TRUE	28	---?-------?--?-----?----???--?-----	28.3	37.6522	0.08352	0.0011301	-0.166667	0.0123684	2.189e-41	0.0139819	1.833e-32	913	FALSE	1
	cg26266427-chr6:31362604:SNP	cg26266427	Body	NM_019105	TNXB	Island	chr6	32063838	chr6:31362604:SNP	rs2523470	701234	0.207884	0.0187858	1.834e-28	19388	A	G	0.0924	0.0318	TRUE	25	+++?+++??++?++?+++++?++++???++??++++	14.2	27.9805	0.2609	0.001492	0.206971	0.0208798	3.674e-23	0.0219015	2.272e-21	913	FALSE	1
	cg26266427-chr6:31071422:SNP	cg26266427	Body	NM_019105	TNXB	Island	chr6	32063838	chr6:31071422:SNP	rs9263595	992416	-0.140099	0.0133924	0	12265	G	A	0.3391	0.0131	TRUE	16	?++??++???+??+??++++??++?????+???+-+	23.4	19.5887	0.1883	0.0009216	-0.14205	0.0162226	2.018e-18	0.0174893	1.142e-15	913	FALSE	1
	cg26266427-chr6:31313030:SNP	cg26266427	Body	NM_019105	TNXB	Island	chr6	32063838	chr6:31313030:SNP	rs2394982	750808	-0.172811	0.0113864	5.028e-52	19264	T	C	0.2789	0.041	TRUE	24	---?----?--?--?-----??--????--??----	32.2	33.9448	0.06596	0.0015132	-0.174518	0.0145794	5.094e-33	0.0168048	8.369e-25	913	FALSE	1
	cg26266427-chr6:32782582:SNP	cg26266427	Body	NM_019105	TNXB	Island	chr6	32063838	chr6:32782582:SNP	rs2071474	718744	0.126224	0.0099045	3.366e-37	24643	T	C	0.2879	0.026	TRUE	31	++++++++-++?++++++++?++++???++++++++	19.1	37.0645	0.1753	0.0007278	0.124913	0.0113983	6.019e-28	0.0122369	6.028e-25	913	FALSE	1
	cg26266427-chr6:32742712:SNP	cg26266427	Body	NM_019105	TNXB	Island	chr6	32063838	chr6:32742712:SNP	rs9276612	678874	-0.166085	0.0103957	1.869e-57	20128	A	G	0.3401	0.0234	TRUE	26	---?-------?--?-----?----????-?-?---	30.2	35.8162	0.07444	0.0012401	-0.166884	0.013056	2.063e-37	0.0148934	7.032e-29	913	FALSE	1
	cg26266427-chr6:30879636:SNP	cg26266427	Body	NM_019105	TNXB	Island	chr6	32063838	chr6:30879636:SNP	rs886420		-0.219198	0.0157026	2.758e-44	17088	T	C	0.1409	0.025	FALSE	24	---?----?--?--?-----?-?+?????-?---+-	32.7	34.1635	0.06283	0.0029301	-0.21003	0.0202335	3.048e-25	0.0233241	5.565e-21	913	FALSE	1
	cg26266427-chr6:32762391:SNP	cg26266427	Body	NM_019105	TNXB	Island	chr6	32063838	chr6:32762391:SNP	rs9276722	698553	0.225676	0.0187659	2.6e-33	20971	G	A	0.0771	0.0144	TRUE	27	---?-------?--?-+---?----????-?---+-	32	38.2421	0.0575	0.0045689	0.210528	0.0239238	1.369e-18	0.0276019	2.932e-16	913	FALSE	1
	cg26266427-chr6:32936120:SNP	cg26266427	Body	NM_019105	TNXB	Island	chr6	32063838	chr6:32936120:SNP	rs59576053	872282	-0.339123	0.0163729	2.67e-95	24142	T	C	0.0859	0.0131	TRUE	30	-----------?--------?---????--------	12.3	33.0584	0.2754	0.0011473	-0.343294	0.0179979	4.147e-81	0.0186642	8.965e-74	913	FALSE	1
	cg26266427-chr6:32279340:SNP	cg26266427	Body	NM_019105	TNXB	Island	chr6	32063838	chr6:32279340:SNP	rs9268202	215502	-0.20632	0.0126446	7.503e-60	17652	T	C	0.2302	0.022	TRUE	25	---?----?--?--?+----?-?--????-?-----	15.1	28.2789	0.2485	0.0007231	-0.206468	0.0140483	6.737e-49	0.0148991	1.311e-43	913	FALSE	1
	cg26266427-chr6:32449138:SNP	cg26266427	Body	NM_019105	TNXB	Island	chr6	32063838	chr6:32449138:SNP	rs9394098	385300	0.130083	0.0120444	3.43e-27	13848	T	C	0.4549	0.0346	TRUE	20	+++?+++???+?++?+++++???+???????+++++	18.7	23.3562	0.222	0.0006777	0.130096	0.0137365	2.776e-21	0.0148058	1.551e-18	913	FALSE	1
	cg26266427-chr6:31351664:SNP	cg26266427	Body	NM_019105	TNXB	Island	chr6	32063838	chr6:31351664:SNP	rs2507978	712174	0.142535	0.0102416	4.98e-44	19054	G	A	0.4387	0.0288	TRUE	24	---?--?-?--?--?-----?---?????-?-----	0	16.3879	0.8382	0	0.142535	0.0102416	4.98e-44	0.0102416	4.98e-44	913	FALSE	1
	cg26266427-chr6:31324790:SNP	cg26266427	Body	NM_019105	TNXB	Island	chr6	32063838	chr6:31324790:SNP	rs9266194	739048	-0.13658	0.0105973	0	17609	A	G	0.4917	0.0253	TRUE	23	---?+--?-?-?--?-----??--????--??----	0.2	22.0406	0.4575	4.9e-06	-0.136556	0.0106129	6.906e-38	0.0106168	7.131e-38	913	FALSE	1
	cg26266427-chr6:32603530:SNP	cg26266427	Body	NM_019105	TNXB	Island	chr6	32063838	chr6:32603530:SNP	rs9272272	539692	-0.234654	0.0150622	1.011e-54	11092	A	G	0.2655	0.0248	TRUE	16	---?-?--?-??--?---??????????-???-?--	43.5	26.5475	0.03265	0.0028698	-0.232756	0.0211953	4.693e-28	0.0266575	1.337e-18	913	FALSE	1
	cg26266427-chr6:32333827:SNP	cg26266427	Body	NM_019105	TNXB	Island	chr6	32063838	chr6:32333827:SNP	rs3129927	269989	-0.406728	0.0216989	2.16e-78	9689	C	A	0.1252	0.0211	TRUE	16	?++??+????+??+?+++++???+?????+?+?+++	44.1	26.8528	0.02996	0.006092	-0.414583	0.0306528	1.112e-41	0.038845	1.18e-25	913	FALSE	1
	cg26266427-chr6:31444934:SNP	cg26266427	Body	NM_019105	TNXB	Island	chr6	32063838	chr6:31444934:SNP	rs2516435	618904	-0.152803	0.0102391	2.318e-50	20967	A	C	0.3404	0.0189	TRUE	27	---?-------?--?-----?---????--?-----	44	46.4112	0.008203	0.0022674	-0.155727	0.0144848	5.855e-27	0.0182772	6.256e-17	913	FALSE	1
	cg26266427-chr6:32156908:SNP	cg26266427	Body	NM_019105	TNXB	Island	chr6	32063838	chr6:32156908:SNP	rs204992	93070	-0.145483	0.011542	1.99e-36	20964	A	G	0.2337	0.0326	TRUE	27	---?----+--?--?+----?----????-?-----	18	31.7153	0.2027	0.0008076	-0.145586	0.0132382	3.932e-28	0.0140791	4.984e-25	913	FALSE	1
	cg26266427-chr6:32655524:SNP	cg26266427	Body	NM_019105	TNXB	Island	chr6	32063838	chr6:32655524:SNP	rs2856681	591686	0.255457	0.0183429	4.357e-44	16063	T	C	0.1067	0.0208	TRUE	22	+++??+++?++?++?+++++???+????++??++-+	8.3	22.8959	0.3496	0.0006824	0.254135	0.0194826	6.86e-39	0.0199989	2.305e-37	913	FALSE	1
	cg26266427-chr6:32599485:SNP	cg26266427	Body	NM_019105	TNXB	Island	chr6	32063838	chr6:32599485:SNP	rs9272070	535647	0.120594	0.0116528	4.229e-25	14960	T	G	0.4861	0.0472	TRUE	21	+++?++++?++?++?-++++???+???????+-?++	41.8	34.3668	0.02375	0.0020854	0.118273	0.0160281	1.594e-13	0.0200235	1.716e-09	913	FALSE	1
	cg26266427-chr6:31325692:SNP	cg26266427	Body	NM_019105	TNXB	Island	chr6	32063838	chr6:31325692:SNP	rs9266244	738146	-0.194547	0.0111673	5.707e-68	19871	G	A	0.279	0.0378	TRUE	25	+++?-+++-++?++?+++++??++????++??++++	17.3	29.0107	0.2197	0.0006669	-0.193927	0.0127669	4.132e-52	0.0134988	4.341e-47	913	FALSE	1
	cg26266427-chr6:32444051:INDEL	cg26266427	Body	NM_019105	TNXB	Island	chr6	32063838	chr6:32444051:INDEL	chr6:32444051:INDEL	380213	-0.214508	0.0145751	4.985e-49	13612	D	I	0.2296	0.0349	TRUE	20	---?---???-?--?-----???-????-???----	8.3	20.7192	0.3525	0.0003919	-0.214101	0.0154448	1.072e-43	0.015894	1.646e-41	913	FALSE	1
	cg26266427-chr6:32381280:SNP	cg26266427	Body	NM_019105	TNXB	Island	chr6	32063838	chr6:32381280:SNP	rs3129966	317442	-0.396922	0.016291	0	17135	C	G	0.1259	0.0175	TRUE	24	---??---?--?--?-----?-?-????--?-----	43.7	40.8792	0.01222	0.00503	-0.399303	0.0228521	2.285e-68	0.0289549	9.06e-43	913	FALSE	1
	cg26266427-chr6:32229238:SNP	cg26266427	Body	NM_019105	TNXB	Island	chr6	32063838	chr6:32229238:SNP	rs143312186	165400	-0.191437	0.0122495	4.678e-55	18136	C	T	0.243	0.0229	TRUE	26	+++?++++?++?++?-++++?+?++???++?+++++	20.5	31.4359	0.175	0.0010184	-0.191441	0.0141431	9.59e-42	0.0154029	1.827e-35	913	FALSE	1
	cg26266427-chr6:32252132:SNP	cg26266427	Body	NM_019105	TNXB	Island	chr6	32063838	chr6:32252132:SNP	rs76036733	188294	-0.401967	0.015996	0	17645	G	A	0.127	0.0197	TRUE	25	+++?++++?++?++?+++++?+?+????++?+++++	44	42.826	0.01041	0.0050965	-0.405404	0.0225246	2.01e-72	0.0285436	4.861e-45	913	FALSE	1
	cg26266427-chr6:31305641:SNP	cg26266427	Body	NM_019105	TNXB	Island	chr6	32063838	chr6:31305641:SNP	rs1631951	758197	-0.274096	0.0127756	4.14e-102	20049	T	C	0.1814	0.0143	TRUE	25	---?----?--?--?-----??--????--?-----	48.8	46.8953	0.00345	0.0039789	-0.275697	0.0189706	7.505e-48	0.0249632	4.769e-28	913	FALSE	1
	cg26266427-chr6:31345535:SNP	cg26266427	Body	NM_019105	TNXB	Island	chr6	32063838	chr6:31345535:SNP	rs28366080	718303	0.206174	0.0185	0	20036	T	C	0.0914	0.0307	TRUE	26	+++?++?+?++?++?+++++?++++???++?+++++	15.8	29.7027	0.2356	0.0017041	0.205204	0.0207817	5.382e-23	0.02198	6.594e-21	913	FALSE	1
	cg26266427-chr6:32609214:SNP	cg26266427	Body	NM_019105	TNXB	Island	chr6	32063838	chr6:32609214:SNP	rs3207984	545376	-0.223405	0.0168946	0	8836	T	G	0.2698	0.0365	TRUE	14	---?-?-?????--?---??????????-???-?--	47.8	24.9239	0.02362	0.003786	-0.217832	0.0248554	1.885e-18	0.0323908	5.305e-12	913	FALSE	1
	cg26266427-chr6:31974328:SNP	cg26266427	Body	NM_019105	TNXB	Island	chr6	32063838	chr6:31974328:SNP	rs1079995	89510	0.201925	0.0193086	1.35e-25	18568	A	G	0.0778	0.0143	TRUE	24	+++?++??+++?++?+++++?+++????++??-+++	18.6	28.2697	0.2058	0.0020918	0.203391	0.0221414	4.077e-20	0.0237326	1.764e-17	913	FALSE	1
	cg26266427-chr6:32573934:SNP	cg26266427	Body	NM_019105	TNXB	Island	chr6	32063838	chr6:32573934:SNP	rs543713	510096	0.203552	0.0148955	1.636e-42	9861	T	C	0.3786	0.0376	TRUE	13	?++??++??????+??++++??+??????????+-+	45	21.8166	0.03963	0.0025012	0.199945	0.0219118	7.175e-20	0.0270808	5.627e-14	913	FALSE	1
	cg26266427-chr6:30359360:SNP	cg26266427	Body	NM_019105	TNXB	Island	chr6	32063838	chr6:30359360:SNP	rs3094049		-0.194975	0.0159996	3.682e-34	16735	A	G	0.1348	0.0209	FALSE	24	---?----?--?--?-----?+?+????--?-?-+-	28.6	32.2346	0.09536	0.0025162	-0.185299	0.0198863	1.186e-20	0.0224235	3.466e-18	913	FALSE	1
	cg26266427-chr6:32560606:SNP	cg26266427	Body	NM_019105	TNXB	Island	chr6	32063838	chr6:32560606:SNP	rs9270556	496768	-0.107293	0.0143115	6.532e-14	10061	A	G	0.4182	0.0488	TRUE	13	-???-?-??--?--?-?-??????????-???-?--	14.3	14.0058	0.3003	0.0004592	-0.106277	0.0158637	2.093e-11	0.0167037	1.334e-10	913	FALSE	1
	cg26266427-chr6:32670897:SNP	cg26266427	Body	NM_019105	TNXB	Island	chr6	32063838	chr6:32670897:SNP	rs2647051	607059	-0.132108	0.0107652	1.284e-34	17654	T	C	0.3995	0.028	TRUE	25	---?----?-+?-+?-----?-?--????-?-----	51.1	49.1298	0.001824	0.0030736	-0.134657	0.0161031	6.156e-17	0.0220371	2.037e-09	913	FALSE	1
	cg26266427-chr6:32752392:SNP	cg26266427	Body	NM_019105	TNXB	Island	chr6	32063838	chr6:32752392:SNP	rs28986380	688554	0.227206	0.0186763	0	21445	G	A	0.0763	0.0145	TRUE	28	---?-------?--?-+---?----???--?---+-	29.7	38.4305	0.07131	0.0042174	0.212925	0.023375	8.307e-20	0.0265829	1.263e-17	913	FALSE	1
	cg26266427-chr6:32452707:SNP	cg26266427	Body	NM_019105	TNXB	Island	chr6	32063838	chr6:32452707:SNP	rs115484013	388869	-0.227099	0.0198328	2.334e-30	8148	T	C	0.1946	0.0217	TRUE	12	-?????-?????--?---??????????-???----	0	7.21062	0.7818	0	-0.227099	0.0198328	2.334e-30	0.0198328	2.334e-30	913	FALSE	1
	cg26266427-chr6:31304732:SNP	cg26266427	Body	NM_019105	TNXB	Island	chr6	32063838	chr6:31304732:SNP	rs1634766	759106	-0.139015	0.0128827	0	12001	T	A	0.4877	0.0476	TRUE	17	?++?++????+??+?+++++??++????+????+++	9.6	17.6947	0.3421	0.0003133	-0.139785	0.0139816	1.559e-23	0.0142472	1.716e-22	913	FALSE	1
	cg26266427-chr6:31452959:SNP	cg26266427	Body	NM_019105	TNXB	Island	chr6	32063838	chr6:31452959:SNP	rs2523701	610879	-0.16246	0.0105	5.332e-54	20966	C	T	0.3101	0.0193	TRUE	27	+++?+++++++?++?+++++?++++????+?+++++	40	43.3231	0.01785	0.0020235	-0.166933	0.0143131	1.971e-31	0.0174959	1.608e-20	913	FALSE	1
	cg26266427-chr6:32378877:SNP	cg26266427	Body	NM_019105	TNXB	Island	chr6	32063838	chr6:32378877:SNP	rs5007264	315039	-0.17237	0.0106378	4.753e-59	17652	C	T	0.4777	0.0231	TRUE	25	+++?++++?++?++?+++++?+?++????+?+++++	30.9	34.7219	0.07263	0.0012811	-0.173913	0.013268	2.976e-39	0.0153901	4.075e-29	913	FALSE	1
	cg26266427-chr6:32590248:SNP	cg26266427	Body	NM_019105	TNXB	Island	chr6	32063838	chr6:32590248:SNP	rs9271549	526410	0.140649	0.0109795	1.439e-37	19342	C	T	0.3256	0.0413	TRUE	24	---?----?--?--?-----??--????-??---+-	16.8	27.6585	0.229	0.0005981	0.139259	0.0124417	4.416e-29	0.0132033	1.697e-26	913	FALSE	1
	cg26266427-chr6:32606144:SNP	cg26266427	Body	NM_019105	TNXB	Island	chr6	32063838	chr6:32606144:SNP	rs9272496	542306	-0.239275	0.0161826	0	9610	G	A	0.2663	0.0277	TRUE	13	+???+?++?+??++?+?+??????????+???+?++	37.6	19.2411	0.08287	0.0021198	-0.238222	0.0215558	2.158e-28	0.0259475	2.93e-20	913	FALSE	1
	cg26266427-chr6:31303529:SNP	cg26266427	Body	NM_019105	TNXB	Island	chr6	32063838	chr6:31303529:SNP	rs28752903	760309	-0.139236	0.0139945	2.538e-23	10203	A	G	0.5045	0.0443	TRUE	13	?--??--???-??-??--????--?????????---	17.1	14.4818	0.271	0.0005617	-0.140752	0.0162112	3.876e-18	0.0168888	1.662e-16	913	FALSE	1
	cg26266427-chr6:30688575:SNP	cg26266427	Body	NM_019105	TNXB	Island	chr6	32063838	chr6:30688575:SNP	rs3132583		-0.182065	0.01652	3.03e-28	15792	C	G	0.1376	0.0246	FALSE	24	?--?----?--?--?-----?-?+????--?---+-	29.3	32.5434	0.08936	0.0027644	-0.177381	0.0205776	6.688e-18	0.0233746	6.754e-15	913	FALSE	1
	cg26266427-chr6:32206243:SNP	cg26266427	Body	NM_019105	TNXB	Island	chr6	32063838	chr6:32206243:SNP	rs9267920	142405	-0.259544	0.0144767	7.072e-72	16926	T	C	0.1685	0.0211	TRUE	24	---?----?--?--?-----?-?-????--??----	42.5	39.9963	0.01538	0.0037751	-0.258517	0.0200402	4.506e-38	0.0251745	6.363e-25	913	FALSE	1
	cg26266427-chr6:32379239:SNP	cg26266427	Body	NM_019105	TNXB	Island	chr6	32063838	chr6:32379239:SNP	rs5007258	315401	-0.172195	0.0106383	0	17651	A	G	0.4778	0.0231	TRUE	25	---?----?--?--?-----?-?--????-?-----	30.1	34.3295	0.07898	0.0012343	-0.173689	0.0131859	1.267e-39	0.015217	1.094e-29	913	FALSE	1
	cg26266427-chr6:32590879:SNP	cg26266427	Body	NM_019105	TNXB	Island	chr6	32063838	chr6:32590879:SNP	rs9271585	527041	0.139889	0.0109727	3.163e-37	19350	A	C	0.3259	0.041	TRUE	24	+++?++++?++?++?+++++??++????+??+++-+	16.1	27.4111	0.2389	0.0005658	0.138677	0.012367	3.503e-29	0.0130771	1.048e-26	913	FALSE	1
	cg26266427-chr6:31362159:SNP	cg26266427	Body	NM_019105	TNXB	Island	chr6	32063838	chr6:31362159:SNP	rs2428476	701679	0.216348	0.0182463	1.978e-32	20866	T	C	0.0897	0.0295	TRUE	27	+++?++++?++?++?+++++?++++???++?+++++	14.4	30.3729	0.2524	0.0015363	0.215194	0.0202416	2.132e-26	0.0213152	3.315e-24	913	FALSE	1
	cg26266427-chr6:32011644:SNP	cg26266427	Body	NM_019105	TNXB	Island	chr6	32063838	chr6:32011644:SNP	rs2894232	52194	0.587473	0.0159496	0	21027	G	A	0.1006	0.017	TRUE	27	------??-?-?--------?---????--------	55.2	58.053	0.0003046	0.008627	0.572137	0.0251971	3.87e-114	0.0356123	3.897e-61	913	FALSE	1
	cg26266427-chr6:30231602:SNP	cg26266427	Body	NM_019105	TNXB	Island	chr6	32063838	chr6:30231602:SNP	rs9261636		-0.149583	0.0141934	5.716e-26	17574	C	G	0.1659	0.0217	FALSE	25	---?----?--?--?-----?+?+????--?---+-	28.6	33.5921	0.09218	0.0020459	-0.142621	0.0175053	3.721e-16	0.0198661	5.091e-14	913	FALSE	1
	cg26266427-chr6:32198981:SNP	cg26266427	Body	NM_019105	TNXB	Island	chr6	32063838	chr6:32198981:SNP	rs3130297	135143	-0.41145	0.015001	1.27e-165	19917	T	C	0.1247	0.0187	TRUE	25	---?----?--?--?-----?---?????-?-----	43.2	42.2386	0.01213	0.0043766	-0.414962	0.0212664	8.589e-85	0.0264009	9.249e-55	913	FALSE	1
	cg26266427-chr6:31874917:INDEL	cg26266427	Body	NM_019105	TNXB	Island	chr6	32063838	chr6:31874917:INDEL	chr6:31874917:INDEL	188921	0.159482	0.0216068	0	14988	I	D	0.0857	0.0338	TRUE	18	?--??--???-??--?----??--?????--??---	0	13.4972	0.7023	0	0.159482	0.0216068	1.57e-13	0.0216068	1.57e-13	913	FALSE	1
	cg26266427-chr6:32565075:SNP	cg26266427	Body	NM_019105	TNXB	Island	chr6	32063838	chr6:32565075:SNP	rs9270611	501237	-0.250809	0.0138239	1.454e-73	13066	T	C	0.2618	0.0273	TRUE	16	---?-?-??-??--?---????-?????-???-?--	52.6	31.654	0.007173	0.0035466	-0.24684	0.0218383	1.267e-29	0.0291721	8.143e-18	913	FALSE	1
	cg26266427-chr6:32649096:SNP	cg26266427	Body	NM_019105	TNXB	Island	chr6	32063838	chr6:32649096:SNP	rs9275096	585258	0.124886	0.0129258	0	16576	T	C	0.2379	0.0163	TRUE	23	+++?++++?+-?+-?+++++???+????++??++-+	40.5	36.9921	0.0237	0.0026588	0.121748	0.0175163	3.638e-12	0.0217342	9.136e-09	913	FALSE	1
	cg26266427-chr6:31800648:INDEL	cg26266427	Body	NM_019105	TNXB	Island	chr6	32063838	chr6:31800648:INDEL	chr6:31800648:INDEL	263190	0.1257	0.0131536	1.22e-21	19796	I	D	0.1844	0.0498	TRUE	25	--+-?-??+?+?---+----?---????---?----	44.5	43.2654	0.009276	0.00356	0.128625	0.0188777	9.517e-12	0.0237123	1.151e-07	913	FALSE	1
	cg26266427-chr6:32674286:INDEL	cg26266427	Body	NM_019105	TNXB	Island	chr6	32063838	chr6:32674286:INDEL	chr6:32674286:INDEL	610448	0.198531	0.0281283	0	5166	D	I	0.1431	0.0289	TRUE	7	+???+???????+??+?????+??????+???+???	7	6.44894	0.3748	0.0004462	0.195787	0.0296486	4.013e-11	0.0302329	5.144e-11	913	FALSE	1
	cg26266427-chr6:31916951:SNP	cg26266427	Body	NM_019105	TNXB	Island	chr6	32063838	chr6:31916951:SNP	rs541862	146887	0.346435	0.0156554	1.67e-108	24633	C	T	0.095	0.0171	TRUE	31	-----------?----+---?----???--------	32.9	44.679	0.04134	0.0037725	0.342542	0.0199938	8.512e-66	0.0233156	6.127e-50	913	FALSE	1
	cg26266427-chr6:31444904:SNP	cg26266427	Body	NM_019105	TNXB	Island	chr6	32063838	chr6:31444904:SNP	rs2523654	618934	-0.153534	0.0102448	9.008e-51	20959	C	G	0.3399	0.0186	TRUE	27	---?-------?--?-----?---????--?-----	43.1	45.7329	0.009769	0.0021945	-0.156413	0.0143807	1.491e-27	0.0180202	1.595e-17	913	FALSE	1
	cg26266427-chr6:31723114:INDEL	cg26266427	Body	NM_019105	TNXB	Island	chr6	32063838	chr6:31723114:INDEL	chr6:31723114:INDEL	340724	-0.409525	0.0181901	0	13403	D	I	0.1269	0.0188	TRUE	16	?--??-????-??--?----??--??????-??---	18.3	18.3601	0.2442	0.0012351	-0.410211	0.0210497	1.397e-84	0.0222648	1.484e-75	913	FALSE	1
	cg26266427-chr6:31923654:SNP	cg26266427	Body	NM_019105	TNXB	Island	chr6	32063838	chr6:31923654:SNP	rs34140409	140184	0.223486	0.0156005	1.516e-46	24141	T	C	0.0955	0.0244	TRUE	30	++++++-++++?++++++++?+++????+++++++-	26.6	39.5302	0.09192	0.0027086	0.219945	0.0192271	2.66e-30	0.0212652	7.815e-26	913	FALSE	1
	cg26266427-chr6:31380529:SNP	cg26266427	Body	NM_019105	TNXB	Island	chr6	32063838	chr6:31380529:SNP	rs2256183	683309	-0.131641	0.0098921	2.089e-40	20410	A	G	0.4815	0.0495	TRUE	26	---?+---?--?--?-----?---????--?-----	0	24.8221	0.4724	0	-0.131641	0.0098921	2.089e-40	0.0098921	2.089e-40	913	FALSE	1
	cg26266427-chr6:31345728:SNP	cg26266427	Body	NM_019105	TNXB	Island	chr6	32063838	chr6:31345728:SNP	rs2844544	718110	0.206438	0.0184835	5.797e-29	20038	T	G	0.0916	0.0308	TRUE	26	+++?++?+?++?++?+++++?++++???++?+++++	13.7	28.9642	0.2654	0.0014338	0.205669	0.020432	7.808e-24	0.0214144	5.411e-22	913	FALSE	1
	cg26266427-chr6:32749659:SNP	cg26266427	Body	NM_019105	TNXB	Island	chr6	32063838	chr6:32749659:SNP	rs28893536	685821	0.227813	0.0187455	5.531e-34	21422	T	C	0.076	0.0146	TRUE	28	+++?+++++++?++?+-+++?++++???++?+++-+	26.2	36.6054	0.1027	0.0035716	0.214821	0.0228371	5.121e-21	0.0254143	3.132e-19	913	FALSE	1
	cg26266427-chr6:31098391:SNP	cg26266427	Body	NM_019105	TNXB	Island	chr6	32063838	chr6:31098391:SNP	rs13196363	965447	0.194845	0.0141395	3.352e-43	20299	T	C	0.1466	0.0213	TRUE	26	++++++??+?+?++++++++?+++????+++?++-+	10.2	27.8356	0.3155	0.0006018	0.194249	0.0152608	4.098e-37	0.0157432	3.505e-35	913	FALSE	1
	cg26266427-chr6:32237221:SNP	cg26266427	Body	NM_019105	TNXB	Island	chr6	32063838	chr6:32237221:SNP	rs9268083	173383	-0.192166	0.0122471	1.751e-55	18114	T	C	0.2435	0.0223	TRUE	26	---?----?--?--?+----?-?--???--?-----	20.6	31.4696	0.1739	0.0010233	-0.191973	0.0141464	5.994e-42	0.0154165	1.159e-35	913	FALSE	1
	cg26266427-chr6:32593690:SNP	cg26266427	Body	NM_019105	TNXB	Island	chr6	32063838	chr6:32593690:SNP	rs9271737	529852	-0.118942	0.0148194	1.006e-15	9014	T	C	0.5216	0.0365	TRUE	13	---?-?????-?--?-?-??????????-???-?+-	34	18.1926	0.11	0.0015263	-0.116578	0.0192286	1.338e-09	0.0224671	1.196e-07	913	FALSE	1
	cg26266427-chr6:32681049:SNP	cg26266427	Body	NM_019105	TNXB	Island	chr6	32063838	chr6:32681049:SNP	rs2647087	617211	0.157945	0.0121808	1.89e-38	17658	C	A	0.2575	0.0445	TRUE	25	---?----?--?-+?-----?-?--????-?-----	37.7	38.5241	0.03062	0.0022724	0.154387	0.015987	4.588e-22	0.0195523	6.58e-16	913	FALSE	1
	cg26266427-chr6:32432582:SNP	cg26266427	Body	NM_019105	TNXB	Island	chr6	32063838	chr6:32432582:SNP	rs9268918	368744	-0.177569	0.0128447	1.818e-43	15772	T	G	0.2639	0.0344	TRUE	22	---?---??--?--?-----???-????--??----	26.8	28.7017	0.1213	0.0013518	-0.175251	0.015535	1.628e-29	0.0175554	4.751e-24	913	FALSE	1
	cg26266427-chr6:31318621:SNP	cg26266427	Body	NM_019105	TNXB	Island	chr6	32063838	chr6:31318621:SNP	rs9266042	745217	-0.169288	0.0101141	6.944e-63	20023	T	A	0.4113	0.024	TRUE	25	+++?-+++?++?++?+++++??++????++?+++++	6.6	25.7083	0.3681	0.0001859	-0.169031	0.0106336	6.762e-57	0.010834	4.869e-55	913	FALSE	1
	cg26266427-chr6:32332823:SNP	cg26266427	Body	NM_019105	TNXB	Island	chr6	32063838	chr6:32332823:SNP	rs3129920	268985	0.130499	0.0128341	2.751e-24	16933	G	A	0.2368	0.0319	TRUE	24	---?----?--?--?-----?-?-????+-??---+	22.9	29.8181	0.1547	0.0011895	0.126786	0.0150821	4.228e-17	0.0166386	4.394e-15	913	FALSE	1
	cg26266427-chr6:32446994:SNP	cg26266427	Body	NM_019105	TNXB	Island	chr6	32063838	chr6:32446994:SNP	rs17203626	383156	0.136164	0.0121648	0	13609	A	G	0.4496	0.0392	TRUE	20	+++?+++???+?++?+++++???+????+???++++	18.7	23.3838	0.2209	0.0006964	0.136597	0.0139017	8.707e-23	0.0149715	9.467e-20	913	FALSE	1
	cg26266427-chr6:32796346:SNP	cg26266427	Body	NM_019105	TNXB	Island	chr6	32063838	chr6:32796346:SNP	rs241452	732508	0.149128	0.0102599	7.275e-48	24641	C	T	0.2574	0.0251	TRUE	31	--------+--?--------?----???--------	10.5	33.5358	0.2998	0.0003907	0.148819	0.011083	4.161e-41	0.0114692	1.184e-38	913	FALSE	1
	cg26266427-chr6:32258088:SNP	cg26266427	Body	NM_019105	TNXB	Island	chr6	32063838	chr6:32258088:SNP	rs6927529	194250	-0.209758	0.0125411	8.516e-63	18139	G	A	0.2264	0.0213	TRUE	26	+++?++++?++?++?-++++?+?++???++?+++++	14.4	29.1975	0.2557	0.0006961	-0.209534	0.0138504	1.052e-51	0.0146467	1.614e-46	913	FALSE	1
	cg26266427-chr6:32751614:SNP	cg26266427	Body	NM_019105	TNXB	Island	chr6	32063838	chr6:32751614:SNP	rs17429127	687776	0.23044	0.0188694	2.669e-34	20945	C	G	0.0767	0.0145	TRUE	27	+++??++++++?++?+-+++?++++???++?+++-+	28	36.0991	0.08986	0.0038134	0.217291	0.0233283	1.225e-20	0.0261987	1.42e-18	913	FALSE	1
	cg26266427-chr6:31756288:INDEL	cg26266427	Body	NM_019105	TNXB	Island	chr6	32063838	chr6:31756288:INDEL	chr6:31756288:INDEL	307550	-0.155979	0.0155023	8.157e-24	11379	I	D	0.2382	0.0258	TRUE	15	?++??+????+??+??++++??++?????+???+++	15.5	16.5629	0.2802	0.0006973	-0.158237	0.0176754	3.479e-19	0.0183401	1.819e-17	913	FALSE	1
	cg26266427-chr6:32036357:SNP	cg26266427	Body	NM_019105	TNXB	Island	chr6	32063838	chr6:32036357:SNP	rs3749962	27481	0.614259	0.0147867	0	24634	A	G	0.0989	0.0191	TRUE	31	+++++++++++?++++++++?++++???++++++++	51.2	61.5319	0.0005983	0.007232	0.603919	0.022301	1.68e-161	0.0303284	3.3e-91	913	FALSE	1
	cg26266427-chr6:31434198:SNP	cg26266427	Body	NM_019105	TNXB	Island	chr6	32063838	chr6:31434198:SNP	rs3128987	629640	-0.273999	0.0128936	3.24e-100	19899	C	T	0.1814	0.0212	TRUE	25	+++?++++?++?++?+++++?+++?????+?+++++	56.3	54.9544	0.0003175	0.0054831	-0.282903	0.0208151	4.513e-42	0.0295233	1.682e-20	913	FALSE	1
	cg26266427-chr6:32233886:SNP	cg26266427	Body	NM_019105	TNXB	Island	chr6	32063838	chr6:32233886:SNP	rs7767325	170048	-0.194297	0.0123924	2.115e-55	17631	C	G	0.2443	0.0217	TRUE	25	---??---?--?--?+----?-?--???--?-----	18.5	29.452	0.2036	0.0008848	-0.194658	0.0141038	2.487e-43	0.0152076	2.223e-37	913	FALSE	1
	cg26266427-chr6:32151934:SNP	cg26266427	Body	NM_019105	TNXB	Island	chr6	32063838	chr6:32151934:SNP	rs3131300	88096	-0.206608	0.0125	2.284e-61	20482	G	A	0.1895	0.0292	TRUE	26	+++?+++++++?++?+++++?+++?????+?+++++	13.5	28.9023	0.268	0.0006492	-0.206749	0.0138867	3.924e-50	0.0144512	2.286e-46	913	FALSE	1
	cg26266427-chr6:32566089:SNP	cg26266427	Body	NM_019105	TNXB	Island	chr6	32063838	chr6:32566089:SNP	rs9270662	502251	-0.271931	0.0138239	3.817e-86	13867	G	T	0.2358	0.0171	TRUE	17	+++?+?++?+??++?+++????+?????+???+?++	58.9	38.9105	0.00112	0.004854	-0.271447	0.0234139	4.451e-31	0.0336184	6.029e-16	913	FALSE	1
	cg26266427-chr6:30381596:SNP	cg26266427	Body	NM_019105	TNXB	Island	chr6	32063838	chr6:30381596:SNP	rs3131111		-0.186788	0.0157173	1.429e-32	17554	C	T	0.1351	0.0234	FALSE	25	+++?++++?++?++?+++++?+?-????++?-++-+	40.2	40.1303	0.02071	0.0042298	-0.175652	0.0216122	4.384e-16	0.0262808	1.183e-12	913	FALSE	1
	cg26266427-chr6:31069672:SNP	cg26266427	Body	NM_019105	TNXB	Island	chr6	32063838	chr6:31069672:SNP	rs9263570	994166	-0.134367	0.011057	5.586e-34	17987	T	C	0.3381	0.0176	TRUE	24	---?---?-?-?--?+----?---????--??--+-	41.7	39.4539	0.01768	0.0021564	-0.13288	0.0154171	6.753e-18	0.018967	1.398e-12	913	FALSE	1
	cg26266427-chr6:31542767:SNP	cg26266427	Body	NM_019105	TNXB	Island	chr6	32063838	chr6:31542767:SNP	rs4248161	521071	-0.420787	0.043568	4.539e-22	15842	A	C	0.9828	0.0039	TRUE	18	-??-?-?---??-?-----??---?????--????+	33.7	25.6453	0.08117	0.0184026	-0.412554	0.0582807	1.455e-12	0.0657244	1.531e-10	913	FALSE	1
	cg26266427-chr6:31101849:SNP	cg26266427	Body	NM_019105	TNXB	Island	chr6	32063838	chr6:31101849:SNP	rs9468872	961989	0.194146	0.0128497	1.414e-51	23269	G	A	0.1555	0.0232	TRUE	29	------?----?--------?---????------+-	31.8	41.0777	0.05283	0.002271	0.193709	0.016246	8.931e-33	0.0188513	7.135e-25	913	FALSE	1
	cg26266427-chr6:32880715:SNP	cg26266427	Body	NM_019105	TNXB	Island	chr6	32063838	chr6:32880715:SNP	rs9276920	816877	0.127889	0.0158553	7.261e-16	20060	T	A	0.1202	0.029	TRUE	26	---?-------?+-?-+--??---????--?+--+-	11.7	28.3258	0.2931	0.0008861	0.124974	0.0172742	4.665e-13	0.0179646	1.087e-12	913	FALSE	1
	cg26266427-chr6:32290208:SNP	cg26266427	Body	NM_019105	TNXB	Island	chr6	32063838	chr6:32290208:SNP	rs9268235	226370	-0.413623	0.0167301	6.02e-135	16307	T	C	0.1255	0.0197	TRUE	23	---?--?-?--?--?-----?-?-?????-?-----	41.6	37.6964	0.01981	0.0046782	-0.417671	0.0231559	9.923e-73	0.0286667	3.413e-47	913	FALSE	1
	cg26266427-chr6:31461778:SNP	cg26266427	Body	NM_019105	TNXB	Island	chr6	32063838	chr6:31461778:SNP	rs2253040	602060	-0.146351	0.0099268	3.407e-49	22663	T	G	0.335	0.0257	TRUE	29	-----------?--------?---????--?-----	36.8	44.3331	0.02575	0.0016971	-0.151005	0.0131535	1.659e-30	0.0157173	1.26e-20	913	FALSE	1
	cg26266427-chr6:32584482:SNP	cg26266427	Body	NM_019105	TNXB	Island	chr6	32063838	chr6:32584482:SNP	rs28383246	520644	0.262938	0.0154409	5.035e-65	17389	A	G	0.1459	0.0259	TRUE	22	+++?++++?+??++?+++++??++????+???++++	30	29.9911	0.09217	0.0022993	0.258968	0.0194514	1.931e-40	0.022052	8.919e-33	913	FALSE	1
	cg26266427-chr6:31315033:SNP	cg26266427	Body	NM_019105	TNXB	Island	chr6	32063838	chr6:31315033:SNP	rs9265940	748805	-0.177887	0.0106702	0	19314	G	A	0.3332	0.026	TRUE	24	+++?++++?++?++?+++++??++????++??++++	0	20.037	0.6397	0	-0.177887	0.0106702	2.113e-62	0.0106702	2.113e-62	913	FALSE	1
	cg26266427-chr3:109060230:SNP	cg26266427	Body	NM_019105	TNXB	Island	chr6	32063838	chr3:109060230:SNP	rs62276085		0.170641	0.00939	8.505e-74	22438	G	C	0.3706	0.0268	FALSE	29	-------?-?-?----+-------???----?----	24.8	37.2308	0.1139	0.0008568	0.168293	0.0112561	1.528e-50	0.0124856	1.599e-42	913	FALSE	1
	cg26266427-chr6:31335582:SNP	cg26266427	Body	NM_019105	TNXB	Island	chr6	32063838	chr6:31335582:SNP	rs2523539	728256	0.206208	0.0184705	6.108e-29	20038	C	T	0.0918	0.0305	TRUE	26	---?--?-?--?--?-----?----???--?-----	13.2	28.814	0.2718	0.0013774	0.205276	0.0203483	6.236e-24	0.0212884	3.445e-22	913	FALSE	1
	cg26266427-chr6:32742567:INDEL	cg26266427	Body	NM_019105	TNXB	Island	chr6	32063838	chr6:32742567:INDEL	chr6:32742567:INDEL	678729	0.112515	0.011023	0	17981	D	I	0.3507	0.0388	TRUE	24	+++?+++?-?-?++?+++++?+++????++??++++	25.5	30.8631	0.1262	0.0010225	0.113103	0.0134037	3.222e-17	0.0147915	2.811e-14	913	FALSE	1
	cg26266427-chr6:32755024:SNP	cg26266427	Body	NM_019105	TNXB	Island	chr6	32063838	chr6:32755024:SNP	rs28986406	691186	0.232242	0.0190367	3.118e-34	20721	A	G	0.0762	0.0146	TRUE	27	+++?+++++++?++?+-+++?+++-???++??++-+	32.9	38.7217	0.05182	0.0048913	0.216576	0.0244908	9.305e-19	0.0283512	2.577e-16	913	FALSE	1
	cg26266427-chr6:31312326:SNP	cg26266427	Body	NM_019105	TNXB	Island	chr6	32063838	chr6:31312326:SNP	rs3134792	751512	-0.329975	0.0144093	0	20137	G	T	0.139	0.0205	TRUE	25	+++?+++++++?++?+++++??++?????+?+++++	25.1	32.0476	0.1258	0.0017851	-0.332245	0.0175457	5.765e-80	0.019241	6.334e-66	913	FALSE	1
	cg26266427-chr6:31819579:SNP	cg26266427	Body	NM_019105	TNXB	Island	chr6	32063838	chr6:31819579:SNP	rs55704201	244259	0.278316	0.0232223	0	20517	A	C	0.0725	0.0708	TRUE	27	+++++++++++?++?+-++??+++????++?+++-+	52.1	54.328	0.0009229	0.0164658	0.288693	0.0369121	5.237e-15	0.0485239	9.714e-09	913	FALSE	1
	cg26266427-chr6:32421469:SNP	cg26266427	Body	NM_019105	TNXB	Island	chr6	32063838	chr6:32421469:SNP	rs3129897	357631	-0.323674	0.0151832	7.73e-101	16565	A	G	0.1579	0.0235	TRUE	24	---?----?--?--?--?--?-?-????--?-----	25.6	30.8988	0.1253	0.0019311	-0.324427	0.0182713	1.547e-70	0.0203974	1.049e-56	913	FALSE	1
	cg26266427-chr6:32628084:SNP	cg26266427	Body	NM_019105	TNXB	Island	chr6	32063838	chr6:32628084:SNP	rs2854277	564246	-0.353905	0.0190917	0	11089	T	C	0.1414	0.0138	TRUE	16	---?-?--?-??--?---??????????-???-?--	44.1	26.8172	0.03026	0.004737	-0.348999	0.0272378	1.386e-37	0.0341323	3.445e-25	913	FALSE	1
	cg26266427-chr6:31941557:SNP	cg26266427	Body	NM_019105	TNXB	Island	chr6	32063838	chr6:31941557:SNP	rs387608	122281	0.438781	0.0136147	0	23296	A	G	0.1327	0.0227	TRUE	29	++++++?++++?++++++++?++++????+++++++	46.3	52.1691	0.003667	0.0047169	0.432894	0.0196297	8.94e-108	0.0253667	4.908e-67	913	FALSE	1
	cg26266427-chr6:32444088:SNP	cg26266427	Body	NM_019105	TNXB	Island	chr6	32063838	chr6:32444088:SNP	rs28732243	380250	-0.133898	0.0121889	4.501e-28	13552	C	G	0.5278	0.0409	TRUE	20	---?---???-?--?-----???-????-???----	4.5	19.9022	0.4005	0.0001438	-0.133844	0.012579	1.934e-26	0.0127677	9.886e-26	913	FALSE	1
	cg26266427-chr6:32673894:SNP	cg26266427	Body	NM_019105	TNXB	Island	chr6	32063838	chr6:32673894:SNP	rs1794269	610056	-0.157267	0.0111054	1.588e-45	16898	T	C	0.3951	0.0375	TRUE	24	---?----?--?--?+----?-?-????--??----	40.7	38.7611	0.02107	0.002059	-0.153729	0.0150845	2.17e-24	0.0187154	4.35e-17	913	FALSE	1
	cg26266427-chr6:32777429:SNP	cg26266427	Body	NM_019105	TNXB	Island	chr6	32063838	chr6:32777429:SNP	rs2857123	713591	0.118819	0.0097028	1.768e-34	24643	T	A	0.3095	0.0337	TRUE	31	--------+--?--------?---+???--------	25.9	40.4794	0.09591	0.001036	0.117391	0.011756	1.761e-23	0.0130921	1.13e-19	913	FALSE	1
	cg26266427-chr6:32412566:SNP	cg26266427	Body	NM_019105	TNXB	Island	chr6	32063838	chr6:32412566:SNP	rs1131541	348728	-0.231791	0.0133703	2.502e-67	18138	A	T	0.1926	0.0217	TRUE	26	---?----?--?--?-----?-?--???--?-----	48.2	48.3021	0.003431	0.004391	-0.234839	0.0194833	1.861e-33	0.0258324	2.889e-19	913	FALSE	1
	cg26266427-chr6:31016550:SNP	cg26266427	Body	NM_019105	TNXB	Island	chr6	32063838	chr6:31016550:SNP	rs3130574		-0.239383	0.0144854	2.393e-61	20001	G	A	0.1414	0.0257	FALSE	26	+++?++?++++?++?+++++?++-????++?+++-+	27.6	34.5507	0.09665	0.0021513	-0.232255	0.0182923	6.151e-37	0.0200192	5.922e-33	913	FALSE	1
	cg26266427-chr6:31106268:SNP	cg26266427	Body	NM_019105	TNXB	Island	chr6	32063838	chr6:31106268:SNP	rs3130573	957570	-0.112529	0.0095109	2.681e-32	24150	G	A	0.3511	0.0236	TRUE	30	++++++++-++?++++++++?+++????++++++-+	11.5	32.7689	0.2872	0.0003588	-0.111759	0.0103601	3.943e-27	0.010747	1.177e-25	913	FALSE	1
	cg26266427-chr6:32588263:SNP	cg26266427	Body	NM_019105	TNXB	Island	chr6	32063838	chr6:32588263:SNP	rs78564544	524425	-0.276027	0.0124366	3.86e-109	17995	C	A	0.2301	0.0312	TRUE	22	+++?+?++?++?++?+++++??++????+???++++	51.4	43.2263	0.002941	0.0037052	-0.276555	0.0190654	1.116e-47	0.0255993	4.16e-27	913	FALSE	1
	cg26266427-chr6:32452506:SNP	cg26266427	Body	NM_019105	TNXB	Island	chr6	32063838	chr6:32452506:SNP	rs71565340	388668	0.145479	0.0126045	0	14308	T	C	0.3365	0.0445	TRUE	21	+++??++???+?++?+++++???++???+??+++-+	16.4	23.9237	0.2457	0.000667	0.14482	0.0141616	1.513e-24	0.0150773	4.969e-22	913	FALSE	1
	cg26266427-chr6:32577641:SNP	cg26266427	Body	NM_019105	TNXB	Island	chr6	32063838	chr6:32577641:SNP	rs535773	513803	-0.264225	0.0157458	3.382e-63	10370	T	G	0.2516	0.0216	TRUE	14	?--??--??????-??----??--?????????---	21.5	16.5678	0.2198	0.0010152	-0.26795	0.0189213	1.591e-45	0.0200672	1.359e-39	913	FALSE	1
	cg26266427-chr6:32565115:SNP	cg26266427	Body	NM_019105	TNXB	Island	chr6	32063838	chr6:32565115:SNP	rs9270614	501277	-0.200096	0.0142222	0	11019	A	C	0.3369	0.0324	TRUE	16	---?-?-??-??--?---??????????-??--?--	49.3	29.5861	0.0135	0.0032337	-0.199437	0.0212097	5.298e-21	0.0280521	9.82e-13	913	FALSE	1
	cg26266427-chr6:32772978:SNP	cg26266427	Body	NM_019105	TNXB	Island	chr6	32063838	chr6:32772978:SNP	rs2199872	709140	0.117651	0.0097052	0	24642	A	G	0.3077	0.0357	TRUE	31	++++++++-++?++++++++?+++-???++++++++	26.7	40.9228	0.08819	0.0010804	0.116067	0.0118333	1.035e-22	0.0132388	6.287e-19	913	FALSE	1
	cg26266427-chr6:32775828:SNP	cg26266427	Body	NM_019105	TNXB	Island	chr6	32063838	chr6:32775828:SNP	rs2857134	711990	0.11762	0.0097049	8.311e-34	24642	T	C	0.3077	0.0357	TRUE	31	++++++++-++?++++++++?+++-???++++++++	26.6	40.8477	0.08946	0.0010729	0.116092	0.01182	9.091e-23	0.0132141	5.53e-19	913	FALSE	1
	cg26266427-chr6:31299970:SNP	cg26266427	Body	NM_019105	TNXB	Island	chr6	32063838	chr6:31299970:SNP	rs9265636	763868	-0.118557	0.0112166	4.114e-26	17085	G	C	0.3829	0.0415	TRUE	22	+++?+++???-?++?+++++??++????++??++-+	46.5	39.2191	0.00924	0.0024758	-0.123773	0.0164466	5.243e-14	0.0209479	1.517e-08	913	FALSE	1
	cg26266427-chr6:30234152:SNP	cg26266427	Body	NM_019105	TNXB	Island	chr6	32063838	chr6:30234152:SNP	rs3130405		-0.151828	0.0143736	4.423e-26	17090	T	C	0.1658	0.0219	FALSE	24	---?----?--?--?-----?+?+?????-?---+-	30.3	32.9949	0.08115	0.002191	-0.144543	0.0179741	8.857e-16	0.0206198	1.795e-13	913	FALSE	1
	cg26266427-chr6:32240712:INDEL	cg26266427	Body	NM_019105	TNXB	Island	chr6	32063838	chr6:32240712:INDEL	chr6:32240712:INDEL	176874	-0.188891	0.0138389	2.039e-42	14674	I	D	0.2317	0.0234	TRUE	22	+++?+++???+?++?-++++?+?+????++??++++	0	18.8703	0.5935	0	-0.188891	0.0138389	2.039e-42	0.0138389	2.039e-42	913	FALSE	1
	cg26266427-chr6:32050758:SNP	cg26266427	Body	NM_019105	TNXB	Island	chr6	32063838	chr6:32050758:SNP	rs1150754	13080	-0.33785	0.0125395	6.92e-160	23289	T	C	0.1603	0.0232	TRUE	29	------?----?--------?---????--------	23.3	36.5243	0.1297	0.0014146	-0.337707	0.014977	1.39e-112	0.016357	8.86e-95	913	FALSE	1
	cg26266427-chr6:32394027:SNP	cg26266427	Body	NM_019105	TNXB	Island	chr6	32063838	chr6:32394027:SNP	rs3135349	330189	-0.232504	0.0140964	4.057e-61	16849	G	A	0.1859	0.0231	TRUE	24	+++?+++??++?++?+++++?+?+????++?+++++	44.3	41.298	0.01095	0.0038508	-0.232525	0.0198148	8.437e-32	0.0253109	4.08e-20	913	FALSE	1
	cg26266427-chr6:31630241:SNP	cg26266427	Body	NM_019105	TNXB	Island	chr6	32063838	chr6:31630241:SNP	rs7992	433597	0.151699	0.0109802	2.049e-43	21434	T	C	0.2663	0.0416	TRUE	28	+++++++++++?++?+++++?++++????+?+++++	10.9	30.2899	0.3013	0.0004192	0.151623	0.0119093	3.951e-37	0.0123181	7.508e-35	913	FALSE	1
	cg26266427-chr6:30233513:SNP	cg26266427	Body	NM_019105	TNXB	Island	chr6	32063838	chr6:30233513:SNP	rs3132657		-0.151107	0.014357	6.63e-26	17092	C	T	0.166	0.022	FALSE	24	+++?++++?++?++?+++++?-?-?????+?+++-+	30.4	33.0683	0.07988	0.0022022	-0.143832	0.0179795	1.246e-15	0.0206418	2.472e-13	913	FALSE	1
	cg26266427-chr6:31379304:SNP	cg26266427	Body	NM_019105	TNXB	Island	chr6	32063838	chr6:31379304:SNP	rs2853977	684534	-0.1317	0.009893	1.958e-40	20408	A	T	0.4813	0.0491	TRUE	26	---?+---?--?--?-----?---????--?-----	0	24.9034	0.4678	0	-0.1317	0.009893	1.958e-40	0.009893	1.958e-40	913	FALSE	1
	cg26266427-chr6:32679146:SNP	cg26266427	Body	NM_019105	TNXB	Island	chr6	32063838	chr6:32679146:SNP	rs9275573	615308	-0.140577	0.0108263	0	17142	C	G	0.4318	0.0277	TRUE	24	---??---?--?-+?-----?-?-????--?-----	43.5	40.7245	0.01273	0.0021975	-0.142202	0.0150342	3.122e-21	0.0191694	2.243e-13	913	FALSE	1
	cg26266427-chr6:32605982:INDEL	cg26266427	Body	NM_019105	TNXB	Island	chr6	32063838	chr6:32605982:INDEL	chr6:32605982:INDEL	542144	0.227374	0.0202057	2.239e-29	6073	D	I	0.7233	0.0359	TRUE	9	+???+???????++?+?+??????????????+?++	44.5	14.4027	0.07185	0.0031305	0.225389	0.0291949	1.162e-14	0.0363771	4.092e-10	913	FALSE	1
	cg26266427-chr6:31242082:SNP	cg26266427	Body	NM_019105	TNXB	Island	chr6	32063838	chr6:31242082:SNP	rs7764413	821756	-0.149363	0.01076	8.222e-44	17305	T	C	0.4741	0.0488	TRUE	23	---?---???-?--?-----?---????--?-?---	0	18.944	0.6488	0	-0.149363	0.01076	8.222e-44	0.01076	8.222e-44	913	FALSE	1
	cg26266427-chr6:32013500:SNP	cg26266427	Body	NM_019105	TNXB	Island	chr6	32063838	chr6:32013500:SNP	rs2072629	50338	0.63631	0.0193071	3.32e-238	14987	C	T	0.0945	0.0092	TRUE	18	?--??--???-??--?----??--?????--??---	25.2	22.7329	0.1581	0.0023401	0.63179	0.0235129	4.94e-159	0.025818	4.06e-134	913	FALSE	1
	cg26266427-chr6:32596013:SNP	cg26266427	Body	NM_019105	TNXB	Island	chr6	32063838	chr6:32596013:SNP	rs9271900	532175	-0.155082	0.0143241	2.575e-27	10930	G	A	0.3258	0.0348	TRUE	16	+++?+?+???+?++?+++?+????????+???+?++	43	26.2937	0.03505	0.0025337	-0.152641	0.0199994	2.306e-14	0.025109	6.56e-10	913	FALSE	1
	cg26266427-chr6:32589305:SNP	cg26266427	Body	NM_019105	TNXB	Island	chr6	32063838	chr6:32589305:SNP	rs9271502	525467	0.186868	0.0118414	0	14820	A	G	0.4269	0.0247	TRUE	19	+++?+?++????++?+++++??+?????+???++-+	17.1	21.7119	0.245	0.0005686	0.184658	0.0135596	3.119e-42	0.0142833	4.122e-39	913	FALSE	1
	cg26266427-chr6:31308862:SNP	cg26266427	Body	NM_019105	TNXB	Island	chr6	32063838	chr6:31308862:SNP	rs1622406	754976	0.238931	0.0288457	1.2e-16	18301	T	C	0.0377	0.011	TRUE	21	+++?++++?+??++?+?+++??+-+????+?+++??	8.9	21.949	0.3433	0.0017203	0.237609	0.0304836	6.459e-15	0.0316567	4.435e-14	913	FALSE	1
	cg26266427-chr6:32444506:SNP	cg26266427	Body	NM_019105	TNXB	Island	chr6	32063838	chr6:32444506:SNP	rs6457599	380668	-0.170735	0.0137653	2.507e-35	13602	A	G	0.2715	0.0366	TRUE	20	---?---???-?--?-----???-????-???----	37.9	30.6154	0.04447	0.0023596	-0.167384	0.0182749	5.228e-20	0.0221805	1.387e-14	913	FALSE	1
	cg26266427-chr6:32587922:SNP	cg26266427	Body	NM_019105	TNXB	Island	chr6	32063838	chr6:32587922:SNP	rs9271424	524084	-0.223941	0.0118731	2.377e-79	18013	C	T	0.2729	0.0388	TRUE	22	+++?+++??++?++?+++++??+?????+??+++++	58.1	50.0834	0.0003552	0.004415	-0.219882	0.0195886	3.075e-29	0.0283163	2.604e-15	913	FALSE	1
	cg26266427-chr6:30789647:SNP	cg26266427	Body	NM_019105	TNXB	Island	chr6	32063838	chr6:30789647:SNP	rs1264352		-0.157029	0.0146684	9.615e-27	15797	C	G	0.176	0.026	FALSE	24	?--?----?--?--?-----?-?+????--?+----	29.3	32.5512	0.08921	0.0021748	-0.15278	0.0181149	3.342e-17	0.0207598	3.905e-14	913	FALSE	1
	cg26266427-chr6:32277211:SNP	cg26266427	Body	NM_019105	TNXB	Island	chr6	32063838	chr6:32277211:SNP	rs9268192	213373	-0.203418	0.0125605	0	17655	T	C	0.2356	0.0236	TRUE	25	---?----?--?--?+----?-?--????-?-----	9.6	26.5518	0.3258	0.0004255	-0.203541	0.0134216	6.007e-52	0.013896	1.595e-48	913	FALSE	1
	cg26266427-chr6:32747502:SNP	cg26266427	Body	NM_019105	TNXB	Island	chr6	32063838	chr6:32747502:SNP	rs4947258	683664	-0.369808	0.0153416	2.21e-128	20965	G	A	0.1129	0.0174	TRUE	27	+++?+++++++?++?+++++?+++????++?+++++	3.2	26.8495	0.4173	0.0002123	-0.370173	0.0157316	1.99e-122	0.0158428	1.65e-120	913	FALSE	1
	cg26266427-chr6:32270283:SNP	cg26266427	Body	NM_019105	TNXB	Island	chr6	32063838	chr6:32270283:SNP	rs7775592	206445	-0.192021	0.0122612	2.797e-55	18134	A	G	0.2424	0.0229	TRUE	26	---?----?--?--?+----?-?--???--?-----	19.4	31.002	0.189	0.0009516	-0.192022	0.0140406	1.409e-42	0.0152048	1.461e-36	913	FALSE	1
	cg26266427-chr6:32658513:SNP	cg26266427	Body	NM_019105	TNXB	Island	chr6	32063838	chr6:32658513:SNP	rs28371258	594675	0.247766	0.0172283	6.774e-47	18143	C	T	0.1086	0.0226	TRUE	26	---?----?--?--?-----?-?--???--?---+-	18.9	30.8184	0.1951	0.0018266	0.244764	0.0197425	2.685e-35	0.0212379	1.897e-31	913	FALSE	1
	cg26266427-chr6:32599645:SNP	cg26266427	Body	NM_019105	TNXB	Island	chr6	32063838	chr6:32599645:SNP	rs28383329	535807	0.205517	0.025333	4.953e-16	6554	T	C	0.1417	0.0256	TRUE	10	+???+???????++?+?+??????????+???+?-+	30.2	12.8897	0.1677	0.0030227	0.196	0.0329501	2.708e-09	0.0362816	1.475e-08	913	FALSE	1
	cg26266427-chr6:31304781:SNP	cg26266427	Body	NM_019105	TNXB	Island	chr6	32063838	chr6:31304781:SNP	rs28367797	759057	-0.147916	0.0127071	2.566e-31	12263	C	T	0.4999	0.0379	TRUE	16	?++??++???+??+??++++??++?????+???+++	2.1	15.32	0.4286	5.76e-05	-0.148175	0.0129337	2.181e-30	0.0129782	4.312e-30	913	FALSE	1
	cg26266427-chr6:30353739:SNP	cg26266427	Body	NM_019105	TNXB	Island	chr6	32063838	chr6:30353739:SNP	rs3130126		-0.193799	0.0161798	4.642e-33	16252	A	C	0.135	0.0211	FALSE	23	---?----?--?--?-----?+?+?????-?-?-+-	31.6	32.1841	0.07431	0.0028449	-0.182993	0.020614	6.861e-19	0.0236696	2.663e-16	913	FALSE	1
	cg26266427-chr6:32774920:SNP	cg26266427	Body	NM_019105	TNXB	Island	chr6	32063838	chr6:32774920:SNP	rs28744289	711082	0.233402	0.0174346	7.176e-41	24634	T	G	0.0765	0.0146	TRUE	31	+++++++++++?++++-+++?++++???++++++-+	26.7	40.9367	0.08796	0.0034955	0.220877	0.0213127	3.629e-25	0.0237905	1.013e-22	913	FALSE	1
	cg26266427-chr6:31976899:SNP	cg26266427	Body	NM_019105	TNXB	Island	chr6	32063838	chr6:31976899:SNP	rs9501600	86939	0.325253	0.0220779	4.014e-49	6844	T	C	0.1787	0.0118	TRUE	8	?++??????????+???+++??+???????????+?	0	5.50914	0.5981	0	0.325253	0.0220779	4.014e-49	0.0220779	4.014e-49	913	FALSE	1
	cg26266427-chr6:31996524:SNP	cg26266427	Body	NM_019105	TNXB	Island	chr6	32063838	chr6:31996524:SNP	rs406658	67314	0.434802	0.0162557	0	18301	A	C	0.1234	0.0293	TRUE	25	++++++??+?+?++?+++++?+++????++?+++++	31.2	34.876	0.07026	0.0030621	0.429214	0.0206328	4.1e-96	0.0236222	1.165e-75	913	FALSE	1
	cg26266427-chr6:31340913:SNP	cg26266427	Body	NM_019105	TNXB	Island	chr6	32063838	chr6:31340913:SNP	rs2263322	722925	-0.173271	0.013111	0	12265	G	A	0.3544	0.0231	TRUE	16	?++??++???+??+??++++??++?????+???+++	32.2	22.1372	0.1043	0.0013678	-0.18319	0.0169999	4.472e-27	0.0193494	3.403e-19	913	FALSE	1
	cg26266427-chr6:31941891:SNP	cg26266427	Body	NM_019105	TNXB	Island	chr6	32063838	chr6:31941891:SNP	rs2284179	121947	0.586406	0.0362941	0	19318	G	T	0.0228	0.0073	TRUE	25	------??---?--?-----?---?????-?-----	0	14.4701	0.9353	0	0.586406	0.0362941	1.013e-58	0.0362941	1.013e-58	913	FALSE	1
	cg26266427-chr6:31769796:SNP	cg26266427	Body	NM_019105	TNXB	Island	chr6	32063838	chr6:31769796:SNP	rs9461726	294042	0.342824	0.0193457	2.889e-70	21423	T	C	0.0689	0.0229	TRUE	28	+++++++++++?++?+++++?+++????++?+++++	0	26.1185	0.512	0	0.342824	0.0193457	2.889e-70	0.0193457	2.889e-70	913	FALSE	1
	cg26266427-chr6:31289272:SNP	cg26266427	Body	NM_019105	TNXB	Island	chr6	32063838	chr6:31289272:SNP	rs9265169	774566	-0.110897	0.0115409	7.328e-22	16182	A	G	0.378	0.0461	TRUE	21	---?---???-??-?-----??--????--??--+-	42.6	34.8129	0.02112	0.0021421	-0.114996	0.0163622	2.093e-12	0.0200887	3.383e-08	913	FALSE	1
	cg26266427-chr6:32170464:INDEL	cg26266427	Body	NM_019105	TNXB	Island	chr6	32063838	chr6:32170464:INDEL	chr6:32170464:INDEL	106626	-0.109007	0.0117792	2.158e-20	14674	D	I	0.4812	0.0298	TRUE	22	--+?-+-???-?--?++---?-?-????--??----	42	36.23	0.0206	0.0022516	-0.105479	0.0162054	7.571e-11	0.0203219	8.139e-08	913	FALSE	1
	cg26266427-chr6:31820727:SNP	cg26266427	Body	NM_019105	TNXB	Island	chr6	32063838	chr6:31820727:SNP	rs17201319	243111	0.485975	0.051024	1.659e-21	12485	T	C	0.0146	0.0029	TRUE	18	?+?+-+?++?+?+-?+-++??+++?????+?????+	40.4	28.503	0.03939	0.0340385	0.463853	0.0724515	1.531e-10	0.0855491	1.342e-08	913	FALSE	1
	cg26266427-chr6:32428804:SNP	cg26266427	Body	NM_019105	TNXB	Island	chr6	32063838	chr6:32428804:SNP	rs9268840	364966	-0.188261	0.0123193	1.012e-52	17167	T	C	0.2633	0.0312	TRUE	24	---?----?--?--?-----?-?-?????-?-----	37.9	37.0187	0.03237	0.0022513	-0.187925	0.0162851	8.321e-31	0.019828	2.209e-21	913	FALSE	1
	cg26266427-chr6:31416662:INDEL	cg26266427	Body	NM_019105	TNXB	Island	chr6	32063838	chr6:31416662:INDEL	chr6:31416662:INDEL	647176	-0.129749	0.0113694	3.64e-30	17431	D	I	0.3222	0.0371	TRUE	23	---?---???-?--?-----?---????--??----	17.4	26.6448	0.225	0.0006446	-0.1299	0.0130225	1.959e-23	0.0137698	4.397e-21	913	FALSE	1
	cg26266427-chr6:31485101:SNP	cg26266427	Body	NM_019105	TNXB	Island	chr6	32063838	chr6:31485101:SNP	rs2516491	578737	-0.184183	0.0107717	1.518e-65	21382	C	A	0.279	0.034	TRUE	27	+++++++?-++?++++++++?+++?????+?+++++	30.8	37.5799	0.06621	0.0014266	-0.186862	0.0136786	1.739e-42	0.0155693	2.736e-32	913	FALSE	1
	cg26266427-chr6:31895619:SNP	cg26266427	Body	NM_019105	TNXB	Island	chr6	32063838	chr6:31895619:SNP	rs9332704	168219	0.681019	0.0659731	0	7172	T	G	0.0182	0.0074	TRUE	12	???+++??+??????+++++?+???????+???+??	42.9	19.2785	0.05627	0.0399714	0.684133	0.0899646	2.861e-14	0.115624	3.863e-09	913	FALSE	1
	cg26266427-chr6:32649347:SNP	cg26266427	Body	NM_019105	TNXB	Island	chr6	32063838	chr6:32649347:SNP	rs1794495	585509	0.260154	0.0181541	1.415e-46	15900	C	T	0.1098	0.0208	TRUE	23	---?----?-??--?-----???--???--??--+-	17.5	26.667	0.2241	0.0016408	0.257741	0.0206358	8.466e-36	0.0220053	2.993e-32	913	FALSE	1
	cg26266427-chr6:31240293:SNP	cg26266427	Body	NM_019105	TNXB	Island	chr6	32063838	chr6:31240293:SNP	rs2524091	823545	-0.180714	0.0104727	1.014e-66	20114	C	T	0.3371	0.0317	TRUE	26	+++?+++++++?++?+++++?+++????++?+?+++	0	23.8414	0.5286	0	-0.180714	0.0104727	1.014e-66	0.0104727	1.014e-66	913	FALSE	1
	cg26266427-chr6:32607767:SNP	cg26266427	Body	NM_019105	TNXB	Island	chr6	32063838	chr6:32607767:SNP	rs9272610	543929	-0.24627	0.0201207	1.909e-34	6561	C	T	0.2476	0.0245	TRUE	10	+???+???????++?+?+??????????+???+?++	66.5	26.8303	0.001492	0.0084833	-0.247209	0.0374406	4.037e-11	0.0599827	4.031e-05	913	FALSE	1
	cg26266427-chr6:30155149:SNP	cg26266427	Body	NM_019105	TNXB	Island	chr6	32063838	chr6:30155149:SNP	rs2517622		-0.193377	0.0165673	1.768e-31	16206	C	G	0.1293	0.0205	FALSE	23	---??-?-?--?--?-----?+?+????--?---+-	37.2	35.0468	0.03831	0.0038198	-0.184158	0.0221542	9.368e-17	0.0263923	2.353e-13	913	FALSE	1
	cg26266427-chr6:32591237:SNP	cg26266427	Body	NM_019105	TNXB	Island	chr6	32063838	chr6:32591237:SNP	rs9271596	527399	0.139745	0.0111969	9.52e-36	18624	G	A	0.3247	0.0412	TRUE	23	---?----?--?--?-----??--????-???--+-	21.6	28.0511	0.174	0.0008111	0.137976	0.0131768	1.172e-25	0.0142766	1.263e-22	913	FALSE	1
	cg26266427-chr6:32757102:SNP	cg26266427	Body	NM_019105	TNXB	Island	chr6	32063838	chr6:32757102:SNP	rs9276710	693264	-0.21833	0.0122733	8.598e-71	20093	C	T	0.2019	0.0194	TRUE	26	+++?++?++++?++?+++++?+++????++?+++++	3	25.7743	0.4197	0.0001243	-0.218453	0.0125747	1.336e-67	0.0126534	1.033e-66	913	FALSE	1
	cg26266427-chr6:32657200:SNP	cg26266427	Body	NM_019105	TNXB	Island	chr6	32063838	chr6:32657200:SNP	rs3129712	593362	0.138265	0.0165775	7.396e-17	10096	A	T	0.261	0.1135	TRUE	12	+???-?++?+??+??+?+???+??????+??++???	31.2	15.9826	0.1418	0.0015301	0.132472	0.0205881	1.239e-10	0.0240865	9.448e-09	913	FALSE	1
	cg26266427-chr6:31420649:INDEL	cg26266427	Body	NM_019105	TNXB	Island	chr6	32063838	chr6:31420649:INDEL	chr6:31420649:INDEL	643189	-0.125897	0.0114854	5.855e-28	16569	D	I	0.3459	0.0377	TRUE	22	---?--????-?--?-----?+--????--??----	17.5	25.453	0.2281	0.0006339	-0.126123	0.0131929	1.179e-21	0.0139209	1.514e-19	913	FALSE	1
	cg26266427-chr6:31081940:SNP	cg26266427	Body	NM_019105	TNXB	Island	chr6	32063838	chr6:31081940:SNP	rs3130976	981898	-0.214684	0.0104921	4.75e-93	24143	C	T	0.254	0.0435	TRUE	30	+++++++++++?++++++++?+++????++++++++	15.5	34.3394	0.2271	0.0006181	-0.214338	0.011769	4.14e-74	0.0124239	6.669e-67	913	FALSE	1
	cg26266427-chr6:32378680:INDEL	cg26266427	Body	NM_019105	TNXB	Island	chr6	32063838	chr6:32378680:INDEL	chr6:32378680:INDEL	314842	-0.160547	0.0145338	2.28e-28	9508	I	D	0.4788	0.0276	TRUE	15	?++??++???+??+??++++???+?????+???+++	35.4	21.6866	0.08529	0.0017775	-0.164606	0.0188773	2.788e-18	0.0225135	9.952e-13	913	FALSE	1
	cg26266427-chr6:32302672:SNP	cg26266427	Body	NM_019105	TNXB	Island	chr6	32063838	chr6:32302672:SNP	rs1265756	238834	-0.209447	0.0134352	8.594e-55	18142	A	G	0.189	0.0214	TRUE	26	---?+---?--?--?-----?-?--???--?-----	19.6	31.1022	0.1857	0.0011624	-0.20963	0.0154393	5.428e-42	0.0167146	5.066e-36	913	FALSE	1
	cg26266427-chr6:32765302:SNP	cg26266427	Body	NM_019105	TNXB	Island	chr6	32063838	chr6:32765302:SNP	rs2621372	701464	0.11471	0.0105264	0	20974	A	C	0.308	0.038	TRUE	27	+++?++++-++?++?+++++?+++-????+?+++++	29.8	37.0501	0.07398	0.0012975	0.112756	0.0131906	1.25e-17	0.0150001	2.053e-14	913	FALSE	1
	cg26266427-chr6:31445948:INDEL	cg26266427	Body	NM_019105	TNXB	Island	chr6	32063838	chr6:31445948:INDEL	chr6:31445948:INDEL	617890	-0.151873	0.0134409	1.323e-29	12265	I	D	0.3355	0.0156	TRUE	16	?++??++???+??+??++++??++?????+???+++	54.7	33.1119	0.004529	0.003655	-0.158985	0.0216465	2.064e-13	0.0296703	3.077e-07	913	FALSE	1
	cg26266427-chr6:31452443:SNP	cg26266427	Body	NM_019105	TNXB	Island	chr6	32063838	chr6:31452443:SNP	rs2516505	611395	-0.159817	0.0103565	1.003e-53	21459	G	C	0.3119	0.021	TRUE	28	+++?+++++++?++?+++++?++++???++?+++++	41.8	46.3975	0.01153	0.0021991	-0.16375	0.01433	3.063e-30	0.0177968	2.705e-19	913	FALSE	1
	cg26266427-chr6:31352255:SNP	cg26266427	Body	NM_019105	TNXB	Island	chr6	32063838	chr6:31352255:SNP	rs28752477	711583	0.212011	0.0180536	7.631e-32	20901	G	T	0.0917	0.03	TRUE	27	---?----?--?--?-----?----???--?-----	12.4	29.6835	0.2809	0.0012672	0.211319	0.0197469	1.003e-26	0.0206113	8.134e-25	913	FALSE	1
	cg26266427-chr6:31298575:SNP	cg26266427	Body	NM_019105	TNXB	Island	chr6	32063838	chr6:31298575:SNP	rs76296357	765263	0.136239	0.0114622	1.401e-32	15926	T	C	0.4023	0.024	TRUE	20	+++?+++???+?++?+++?+??++????+???-+-+	37.4	30.3299	0.04775	0.0016147	0.13694	0.0153922	5.752e-19	0.0182972	9.63e-14	913	FALSE	1
	cg26266427-chr6:31323353:SNP	cg26266427	Body	NM_019105	TNXB	Island	chr6	32063838	chr6:31323353:SNP	rs2257269	740485	0.145533	0.0107747	1.425e-41	17806	A	G	0.4124	0.0342	TRUE	23	+++?-++???+?++?+++++??++????++?+++++	40.5	37.0026	0.02364	0.0018653	0.141377	0.0148193	1.428e-21	0.0181224	9.705e-16	913	FALSE	1
	cg26266427-chr6:32602372:SNP	cg26266427	Body	NM_019105	TNXB	Island	chr6	32063838	chr6:32602372:SNP	rs9272225	538534	-0.239512	0.0116501	6.41e-94	18235	T	G	0.267	0.0218	TRUE	22	---?-?--?--?--?-----??-?????-??-----	24.3	27.7402	0.1477	0.0009835	-0.239111	0.0140234	3.445e-65	0.0153893	1.288e-54	913	FALSE	1
	cg26266427-chr6:32649508:SNP	cg26266427	Body	NM_019105	TNXB	Island	chr6	32063838	chr6:32649508:SNP	rs9275107	585670	0.126552	0.0124832	3.754e-24	17793	G	A	0.237	0.0157	TRUE	25	---?----?-+?--?-----???--???--?---+-	35.8	37.3688	0.04019	0.0021997	0.123875	0.0162008	2.069e-14	0.0194367	7.466e-11	913	FALSE	1
	cg26266427-chr6:32337397:SNP	cg26266427	Body	NM_019105	TNXB	Island	chr6	32063838	chr6:32337397:SNP	rs3129940	273559	0.134164	0.0125897	0	17653	T	C	0.2369	0.0311	TRUE	25	+++?++++?++?++?+++++?+?+????-+?++++-	27.5	33.0894	0.1022	0.0015216	0.130287	0.0153016	1.672e-17	0.0173577	1.081e-14	913	FALSE	1
	cg26266427-chr6:30759426:SNP	cg26266427	Body	NM_019105	TNXB	Island	chr6	32063838	chr6:30759426:SNP	rs3131048		-0.19245	0.0154476	1.262e-35	17198	A	G	0.1419	0.024	FALSE	25	---?----?--?--?-----?-?+-???--?+?---	43.5	42.448	0.01149	0.0046727	-0.180784	0.021829	1.213e-16	0.0273217	1.87e-12	913	FALSE	1
	cg26266427-chr6:31615167:SNP	cg26266427	Body	NM_019105	TNXB	Island	chr6	32063838	chr6:31615167:SNP	rs2844463	448671	0.185437	0.0151503	1.905e-34	20941	A	G	0.1251	0.0328	TRUE	27	+++++++++++?++?+++-+?+++?????+?+++++	6.1	27.6765	0.3746	0.0004069	0.184499	0.0158369	2.296e-31	0.0161272	1.345e-30	913	FALSE	1
	cg26266427-chr6:32565154:SNP	cg26266427	Body	NM_019105	TNXB	Island	chr6	32063838	chr6:32565154:SNP	rs9270616	501316	-0.193463	0.0156969	6.654e-35	8851	G	C	0.349	0.0332	TRUE	14	+++?+?+?????++?+++??????????+???+?++	57.1	30.3031	0.004258	0.0047598	-0.190376	0.0256752	1.218e-13	0.0365896	1.241e-07	913	FALSE	1
	cg26266427-chr6:31289517:SNP	cg26266427	Body	NM_019105	TNXB	Island	chr6	32063838	chr6:31289517:SNP	rs9265183	774321	-0.118655	0.0112277	4.193e-26	17078	T	C	0.3791	0.042	TRUE	22	---?---???-?--?-----??--????--??--+-	46.6	39.3029	0.009029	0.0024913	-0.124498	0.0164791	4.191e-14	0.0210135	1.636e-08	913	FALSE	1
	cg26266427-chr6:32561019:INDEL	cg26266427	Body	NM_019105	TNXB	Island	chr6	32063838	chr6:32561019:INDEL	chr6:32561019:INDEL	497181	-0.263604	0.0199929	1.072e-39	6556	D	I	0.2437	0.0227	TRUE	10	-???-???????--?-?-??????????-???-?--	68.7	28.7746	0.0007073	0.0093096	-0.262789	0.038594	9.824e-12	0.0639209	3.725e-05	913	FALSE	1
	cg26266427-chr6:32583885:INDEL	cg26266427	Body	NM_019105	TNXB	Island	chr6	32063838	chr6:32583885:INDEL	chr6:32583885:INDEL	520047	-0.199095	0.0127202	3.225e-55	12432	D	I	0.4388	0.0357	TRUE	19	---?---?????--?-----???-????-???----	7.3	19.418	0.3665	0.0002471	-0.199127	0.0133836	4.547e-50	0.0137223	1.063e-47	913	FALSE	1
	cg26266427-chr6:31307031:SNP	cg26266427	Body	NM_019105	TNXB	Island	chr6	32063838	chr6:31307031:SNP	rs28753010	756807	-0.132074	0.011315	1.762e-31	15634	G	T	0.5193	0.047	TRUE	20	+++??+????+?++?+++++??++????++??++++	5.2	20.0485	0.3917	0.0001458	-0.132345	0.0117977	3.332e-29	0.0119395	1.918e-28	913	FALSE	1
	cg26266427-chr6:32442836:SNP	cg26266427	Body	NM_019105	TNXB	Island	chr6	32063838	chr6:32442836:SNP	rs13211921	378998	0.130303	0.0118401	3.605e-28	14327	G	T	0.4503	0.0362	TRUE	21	---?---???-?--?-----???--??????-----	11.7	22.6454	0.3065	0.0003961	0.130483	0.0128326	2.752e-24	0.0134062	2.486e-22	913	FALSE	1
	cg26266427-chr6:31094728:SNP	cg26266427	Body	NM_019105	TNXB	Island	chr6	32063838	chr6:31094728:SNP	rs12199460	969110	0.230794	0.0153316	3.278e-51	24148	G	A	0.0997	0.0149	TRUE	30	-----------?--------?---????----+-+-	30.1	41.4702	0.06262	0.0030808	0.23381	0.019162	3.042e-34	0.0219243	6.499e-26	913	FALSE	1
	cg26266427-chr6:31298590:SNP	cg26266427	Body	NM_019105	TNXB	Island	chr6	32063838	chr6:31298590:SNP	rs9265569	765248	-0.118174	0.0109416	3.426e-27	17809	A	G	0.3858	0.042	TRUE	23	---?---???-?--?-----??--????--?---+-	40.9	37.2188	0.02238	0.0019574	-0.123238	0.0151639	4.399e-16	0.0185105	1.724e-10	913	FALSE	1
	cg26266427-chr6:31075601:INDEL	cg26266427	Body	NM_019105	TNXB	Island	chr6	32063838	chr6:31075601:INDEL	chr6:31075601:INDEL	988237	-0.135292	0.0098247	0	20701	D	I	0.4418	0.031	TRUE	26	---?---?-?-?--------?---????---?----	28	34.7296	0.09321	0.0009976	-0.134862	0.0121602	1.396e-28	0.0136483	3.666e-23	913	FALSE	1
	cg26266427-chr6:32315975:SNP	cg26266427	Body	NM_019105	TNXB	Island	chr6	32063838	chr6:32315975:SNP	rs3117126	252137	0.139612	0.0124383	3.098e-29	17657	C	T	0.242	0.0286	TRUE	25	---?----?--?--?-----?-?+-????-?----+	29.7	34.1302	0.08238	0.0016549	0.13707	0.0153716	4.786e-19	0.0176885	2.954e-15	913	FALSE	1
	cg26266427-chr6:32608721:SNP	cg26266427	Body	NM_019105	TNXB	Island	chr6	32063838	chr6:32608721:SNP	rs9272665	544883	-0.231845	0.0199585	3.404e-31	6549	A	G	0.2626	0.0471	TRUE	10	-???-???????--?-?-??????????-???-?--	67.8	27.9498	0.0009725	0.0088927	-0.238833	0.0381011	3.648e-10	0.061982	0.0001836	913	FALSE	1
	cg26266427-chr6:32358270:SNP	cg26266427	Body	NM_019105	TNXB	Island	chr6	32063838	chr6:32358270:SNP	rs3117099	294432	-0.199687	0.0130498	7.426e-53	16816	A	G	0.2274	0.0305	TRUE	24	---?----?--?--?-----?-?--????-?-?---	48.5	44.6571	0.004377	0.0039038	-0.19594	0.0190644	8.873e-25	0.0253377	3.247e-15	913	FALSE	1
	cg26266427-chr6:32568165:SNP	cg26266427	Body	NM_019105	TNXB	Island	chr6	32063838	chr6:32568165:SNP	rs28752493	504327	0.196881	0.0119755	9.835e-61	15026	C	G	0.378	0.0321	TRUE	19	+++?+++??+??++?+++++??+?????+???+?-+	42.1	31.0748	0.02822	0.0020475	0.19107	0.0169287	1.527e-29	0.0206743	1.682e-21	913	FALSE	1
	cg26266427-chr6:31368370:SNP	cg26266427	Body	NM_019105	TNXB	Island	chr6	32063838	chr6:31368370:SNP	rs2596539	695468	0.210317	0.0180525	2.287e-31	20897	C	T	0.0912	0.0303	TRUE	27	---?----?--?--?-----?----???--?-----	14.9	30.5359	0.246	0.0015608	0.209413	0.0201132	2.192e-25	0.021202	3.417e-23	913	FALSE	1
	cg26266427-chr6:31347144:SNP	cg26266427	Body	NM_019105	TNXB	Island	chr6	32063838	chr6:31347144:SNP	rs3094600	716694	-0.175383	0.0114317	0	19064	A	G	0.2748	0.0161	TRUE	24	---?--?-?--?--?-----?---?????-?-----	52.1	48.0001	0.001673	0.0034892	-0.172583	0.0175855	9.803e-23	0.0238576	1.963e-13	913	FALSE	1
	cg26266427-chr6:31521123:SNP	cg26266427	Body	NM_019105	TNXB	Island	chr6	32063838	chr6:31521123:SNP	rs74459760	542715	0.461692	0.0440698	1.109e-25	16568	T	C	0.0162	0.0038	TRUE	19	+??+?+?+++??+?+++++??+++?????+++???-	44.2	32.2835	0.02035	0.030975	0.458316	0.0646346	1.333e-12	0.0790403	5.182e-09	913	FALSE	1
	cg26266427-chr6:32596041:SNP	cg26266427	Body	NM_019105	TNXB	Island	chr6	32063838	chr6:32596041:SNP	rs9271905	532203	-0.286666	0.0206638	9.248e-44	6556	A	G	0.2263	0.0314	TRUE	11	?--???-???-??-??----??????????????--	24.3	13.2103	0.2122	0.001559	-0.288547	0.0246472	1.173e-31	0.0272975	8.495e-26	913	FALSE	1
	cg26266427-chr6:30708955:SNP	cg26266427	Body	NM_019105	TNXB	Island	chr6	32063838	chr6:30708955:SNP	rs1059612		-0.197351	0.0158631	1.568e-35	17092	T	C	0.1367	0.0236	FALSE	24	---?----?--?--?-----?-?+?????-?---+-	33.5	34.5959	0.05702	0.003105	-0.188678	0.0205767	4.753e-20	0.0238608	1.329e-16	913	FALSE	1
	cg26266427-chr6:31313294:INDEL	cg26266427	Body	NM_019105	TNXB	Island	chr6	32063838	chr6:31313294:INDEL	chr6:31313294:INDEL	750544	0.160269	0.0142223	1.87e-29	17060	D	I	0.1821	0.0284	TRUE	22	+++?+++???+?++?+++++??++????++??++-+	23.8	27.5654	0.1529	0.0014245	0.159806	0.0169893	5.14e-21	0.0186687	9.093e-18	913	FALSE	1
	cg26266427-chr6:32255269:SNP	cg26266427	Body	NM_019105	TNXB	Island	chr6	32063838	chr6:32255269:SNP	rs9268137	191431	-0.209268	0.0126604	2.26e-61	17656	A	G	0.2293	0.0229	TRUE	25	---?----?--?--?+----?-?--????-?-----	19.9	29.962	0.186	0.0010101	-0.209513	0.0145622	6.196e-47	0.0158055	5.143e-40	913	FALSE	1
	cg26266427-chr6:31296416:SNP	cg26266427	Body	NM_019105	TNXB	Island	chr6	32063838	chr6:31296416:SNP	rs115168686	767422	-0.116564	0.0121656	9.571e-22	14509	G	C	0.3768	0.0446	TRUE	18	+++?+++???+?++?+++????++????????++-+	54	36.9221	0.003448	0.0032524	-0.123686	0.0194982	2.246e-10	0.0264224	1.026e-05	913	FALSE	1
	cg26266427-chr6:32598224:SNP	cg26266427	Body	NM_019105	TNXB	Island	chr6	32063838	chr6:32598224:SNP	rs9272013	534386	-0.110002	0.013067	3.821e-17	11963	T	C	0.4832	0.0399	TRUE	18	---?---???-?--?+----????????-???+?+-	44.6	30.6698	0.0219	0.0025298	-0.106296	0.0185396	9.84e-09	0.0235743	3.069e-06	913	FALSE	1
	cg26266427-chr6:32229826:SNP	cg26266427	Body	NM_019105	TNXB	Island	chr6	32063838	chr6:32229826:SNP	rs112917638	165988	-0.191838	0.0122516	2.92e-55	18136	T	C	0.2429	0.023	TRUE	26	---?----?--?--?+----?-?--???--?-----	19.2	30.9424	0.1909	0.0009407	-0.191895	0.0140152	1.135e-42	0.0151638	1.104e-36	913	FALSE	1
	cg26266427-chr6:32930126:SNP	cg26266427	Body	NM_019105	TNXB	Island	chr6	32063838	chr6:32930126:SNP	rs58173627	866288	-0.338713	0.0163454	2.18e-95	24144	A	G	0.0862	0.013	TRUE	30	-----------?--------?---????--------	12.7	33.2248	0.2688	0.0011903	-0.342959	0.0180274	1.073e-80	0.0187266	4.015e-73	913	FALSE	1
	cg26266427-chr6:32450580:SNP	cg26266427	Body	NM_019105	TNXB	Island	chr6	32063838	chr6:32450580:SNP	rs35957722	386742	0.141242	0.0125424	2.042e-29	14313	C	T	0.3477	0.0458	TRUE	21	---?---???-?--?-----???-????-??---+-	17.5	24.2465	0.2318	0.0007147	0.140493	0.0142033	4.527e-23	0.0152055	1.559e-20	913	FALSE	1
	cg26266427-chr6:32594022:SNP	cg26266427	Body	NM_019105	TNXB	Island	chr6	32063838	chr6:32594022:SNP	rs9271761	530184	0.137413	0.0135547	3.757e-24	12357	A	C	0.3393	0.0464	TRUE	17	+++?+?+??++?++?+++?+????????+???+?-+	6.3	17.0732	0.3809	0.0002154	0.137497	0.0142006	3.581e-22	0.0144638	2.089e-21	913	FALSE	1
	cg26266427-chr6:32602827:INDEL	cg26266427	Body	NM_019105	TNXB	Island	chr6	32063838	chr6:32602827:INDEL	chr6:32602827:INDEL	538989	-0.251264	0.0147555	5.044e-65	12500	D	I	0.2379	0.025	TRUE	18	---?-?-???-?--?-----????????-???----	45.8	31.391	0.01789	0.0033852	-0.249962	0.0210642	1.763e-32	0.0272464	2.918e-20	913	FALSE	1
	cg26266427-chr6:32375745:SNP	cg26266427	Body	NM_019105	TNXB	Island	chr6	32063838	chr6:32375745:SNP	rs6926737	311907	-0.17279	0.0106418	2.765e-59	17654	G	A	0.4777	0.0232	TRUE	25	+++?++++?++?++?+++++?+?++????+?+++++	30.8	34.6582	0.07363	0.0012745	-0.174361	0.0132606	1.728e-39	0.0153677	2.488e-29	913	FALSE	1
	cg26266427-chr6:30855211:SNP	cg26266427	Body	NM_019105	TNXB	Island	chr6	32063838	chr6:30855211:SNP	rs1264324		-0.219848	0.0157038	1.566e-44	17092	G	T	0.1408	0.0251	FALSE	24	+++?++++?++?++?+++++?+?-?????+?+++-+	32.9	34.2912	0.06106	0.0029642	-0.210535	0.0202796	3.006e-25	0.0234132	6.004e-21	913	FALSE	1
	cg26266427-chr6:31326223:SNP	cg26266427	Body	NM_019105	TNXB	Island	chr6	32063838	chr6:31326223:SNP	rs2596474	737615	0.104792	0.0111518	5.622e-21	17639	G	A	0.3552	0.0356	TRUE	23	---?+--?-?+?--?-----??--????--??----	27.1	30.1833	0.1141	0.0010897	0.102528	0.0137018	7.274e-14	0.0153	7.427e-12	913	FALSE	1
	cg26266427-chr6:30174428:SNP	cg26266427	Body	NM_019105	TNXB	Island	chr6	32063838	chr6:30174428:SNP	rs885913		-0.15131	0.015994	3.067e-21	14962	T	A	0.1523	0.0237	FALSE	23	?++?++++?++?++?+++++?-?-????++?+?+-+	21.9	28.1639	0.1703	0.0016758	-0.146917	0.0187103	4.09e-15	0.0204751	1.469e-13	913	FALSE	1
	cg26266427-chr6:32600730:SNP	cg26266427	Body	NM_019105	TNXB	Island	chr6	32063838	chr6:32600730:SNP	rs9272136	536892	-0.110645	0.0130662	2.497e-17	11971	T	C	0.4838	0.0387	TRUE	18	---?---???-?--?+----????????-???+?+-	38.7	27.7451	0.04801	0.0019882	-0.107233	0.0175694	1.038e-09	0.021325	2.12e-07	913	FALSE	1
	cg26266427-chr6:32421329:SNP	cg26266427	Body	NM_019105	TNXB	Island	chr6	32063838	chr6:32421329:SNP	rs9268796	357491	-0.154583	0.012328	4.557e-36	13585	T	G	0.4192	0.0384	TRUE	21	---?---???-?--?--?--?-?-????--??----	21.4	25.4473	0.1848	0.000885	-0.154968	0.0143439	3.302e-27	0.0156858	6.522e-23	913	FALSE	1
	cg26266427-chr6:32590154:SNP	cg26266427	Body	NM_019105	TNXB	Island	chr6	32063838	chr6:32590154:SNP	rs9271546	526316	-0.164881	0.0116173	1.015e-45	14684	T	C	0.4705	0.0352	TRUE	21	---?----?-??--?-----???-????-???----	0	16.7693	0.6679	0	-0.164881	0.0116173	1.015e-45	0.0116173	1.015e-45	913	FALSE	1
	cg26266427-chr6:32769575:SNP	cg26266427	Body	NM_019105	TNXB	Island	chr6	32063838	chr6:32769575:SNP	rs2621360	705737	0.118206	0.009794	1.538e-33	24156	A	G	0.3081	0.0352	TRUE	30	++++++++-++?++++++++?+++-????+++++++	28.4	40.504	0.07603	0.0011607	0.116755	0.0121042	5.121e-22	0.0136793	5.562e-18	913	FALSE	1
	cg26266427-chr6:32566076:SNP	cg26266427	Body	NM_019105	TNXB	Island	chr6	32063838	chr6:32566076:SNP	rs9270659	502238	-0.208144	0.0158369	1.866e-39	8856	T	C	0.3332	0.028	TRUE	14	---?-?-?????--?---??????????-???-?--	51.5	26.8276	0.01313	0.0038715	-0.204175	0.0243356	4.862e-17	0.032682	1.905e-10	913	FALSE	1
	cg26266427-chr6:31323506:SNP	cg26266427	Body	NM_019105	TNXB	Island	chr6	32063838	chr6:31323506:SNP	rs4990036	740332	-0.316315	0.0142002	6.39e-110	20085	T	C	0.1437	0.0194	TRUE	25	---??------?--?-----??--????--?-----	25.5	32.2202	0.1216	0.001769	-0.318389	0.0172943	1.092e-75	0.0190638	7.904e-62	913	FALSE	1
	cg26266427-chr6:32579671:SNP	cg26266427	Body	NM_019105	TNXB	Island	chr6	32063838	chr6:32579671:SNP	rs77223148	515833	0.188381	0.0093732	7.73e-90	22786	T	C	0.4481	0.0191	TRUE	27	+++?++++?++?+++++++++?++????+++?++-+	41.7	44.5626	0.01314	0.0017219	0.185662	0.0129244	8.548e-47	0.0160652	9.38e-32	913	FALSE	1
	cg26266427-chr6:32379011:SNP	cg26266427	Body	NM_019105	TNXB	Island	chr6	32063838	chr6:32379011:SNP	rs5007262	315173	-0.172117	0.0106349	6.524e-59	17652	A	G	0.4777	0.0229	TRUE	25	---?----?--?--?-----?-?--????-?-----	30.4	34.4665	0.07671	0.0012499	-0.173591	0.0132104	1.931e-39	0.0152729	1.857e-29	913	FALSE	1
	cg26266427-chr6:31947460:SNP	cg26266427	Body	NM_019105	TNXB	Island	chr6	32063838	chr6:31947460:SNP	rs389883	116378	-0.220556	0.0098774	1.92e-110	24150	G	T	0.3046	0.0388	TRUE	30	+++++++++++?++++++++?+++????++++++++	8.5	31.6987	0.3333	0.0002772	-0.220275	0.0105301	3.64e-97	0.0107966	9.36e-93	913	FALSE	1
	cg26266427-chr6:31089204:SNP	cg26266427	Body	NM_019105	TNXB	Island	chr6	32063838	chr6:31089204:SNP	rs3095315	974634	-0.210562	0.0107598	2.824e-85	24143	T	C	0.236	0.0446	TRUE	30	-----------?--------?---????--------	3.3	29.9743	0.4153	0.0001187	-0.210529	0.0110269	2.928e-81	0.0111213	6.073e-80	913	FALSE	1
	cg26266427-chr6:32592796:SNP	cg26266427	Body	NM_019105	TNXB	Island	chr6	32063838	chr6:32592796:SNP	rs28383322	528958	0.242242	0.0145069	1.346e-62	12956	T	C	0.2379	0.0254	TRUE	19	+++?+++??+??++?+++++????????+??++?++	55.8	40.7159	0.001666	0.0051586	0.235563	0.0230863	1.911e-24	0.0328146	1.557e-13	913	FALSE	1
	cg26266427-chr6:32333299:SNP	cg26266427	Body	NM_019105	TNXB	Island	chr6	32063838	chr6:32333299:SNP	rs3129924	269461	-0.2006	0.0134612	3.193e-50	17655	T	C	0.1951	0.0193	TRUE	25	---?+---?--?--?-----?-?-????--?-----	17.9	29.2149	0.2121	0.0009992	-0.200271	0.0152657	2.561e-39	0.0163861	1.853e-34	913	FALSE	1
	cg26266427-chr6:32609476:SNP	cg26266427	Body	NM_019105	TNXB	Island	chr6	32063838	chr6:32609476:SNP	rs28383458	545638	0.247881	0.0238249	2.37e-25	7426	C	T	0.1425	0.0253	TRUE	11	-???-?-?????--?-?-??????????-???-?+-	44	17.8575	0.05742	0.0052273	0.239805	0.0347012	4.827e-12	0.0425453	5.668e-09	913	FALSE	1
	cg26266427-chr6:32438715:SNP	cg26266427	Body	NM_019105	TNXB	Island	chr6	32063838	chr6:32438715:SNP	rs9269045	374877	-0.187667	0.0123303	2.606e-52	17059	C	G	0.2643	0.0334	TRUE	24	---?----?--?--?-----???--???-??-----	36.2	36.0701	0.04058	0.002102	-0.186167	0.0160525	4.25e-31	0.0193371	2.871e-22	913	FALSE	1
	cg26266427-chr6:30279130:SNP	cg26266427	Body	NM_019105	TNXB	Island	chr6	32063838	chr6:30279130:SNP	rs3130380		-0.197444	0.0164004	0	17092	A	G	0.1263	0.0208	FALSE	24	---?----?--?--?-----?+?+?????-?---+-	30.4	33.0335	0.08048	0.0028711	-0.188759	0.0206937	7.404e-20	0.0235549	5.19e-17	913	FALSE	1
	cg26266427-chr6:31070414:SNP	cg26266427	Body	NM_019105	TNXB	Island	chr6	32063838	chr6:31070414:SNP	rs2844638	993424	-0.141983	0.0101299	1.241e-44	21450	T	A	0.3426	0.0254	TRUE	28	+++?+++++++?++?-++++?++++???++?+++-+	40.3	45.2474	0.01531	0.0019811	-0.142953	0.0138499	5.627e-25	0.016976	6.076e-17	913	FALSE	1
	cg26266427-chr6:32431954:SNP	cg26266427	Body	NM_019105	TNXB	Island	chr6	32063838	chr6:32431954:SNP	rs9268894	368116	-0.171574	0.0135475	9.291e-37	14318	G	T	0.2614	0.0373	TRUE	21	+++?-++???+?++?+++++???+????++??++++	41.4	34.1488	0.02514	0.0027726	-0.16833	0.0185161	9.812e-20	0.0231316	1.195e-13	913	FALSE	1
	cg26266427-chr6:32774465:SNP	cg26266427	Body	NM_019105	TNXB	Island	chr6	32063838	chr6:32774465:SNP	rs6912414	710627	-0.173645	0.0097223	2.395e-71	23296	A	G	0.333	0.0287	TRUE	29	------?----?--------?----????-------	36.5	44.1085	0.02711	0.0016045	-0.174217	0.0128479	6.909e-42	0.0153155	8.525e-30	913	FALSE	1
	cg26266427-chr6:31071979:SNP	cg26266427	Body	NM_019105	TNXB	Island	chr6	32063838	chr6:31071979:SNP	rs2517526	991859	-0.145893	0.0097839	2.772e-50	22921	G	C	0.3433	0.0248	TRUE	29	+++?+++++++?++?-++++?++++???++++++-+	40.9	47.3728	0.01251	0.0019567	-0.145947	0.0134404	1.811e-27	0.0165532	1.212e-18	913	FALSE	1
	cg26266427-chr6:32327354:SNP	cg26266427	Body	NM_019105	TNXB	Island	chr6	32063838	chr6:32327354:SNP	rs28366183	263516	0.235339	0.0212426	1.593e-28	16935	G	T	0.0785	0.0205	TRUE	24	---?----?--?--?-----?-?--????-??---+	0	16.6055	0.8282	0	0.235339	0.0212426	1.593e-28	0.0212426	1.593e-28	913	FALSE	1
	cg26266427-chr6:31175946:SNP	cg26266427	Body	NM_019105	TNXB	Island	chr6	32063838	chr6:31175946:SNP	rs1619179	887892	-0.316594	0.0140912	8.62e-112	20937	C	A	0.1438	0.0245	TRUE	27	+++?+++++++?++?+++++?+++????++?+++++	22.8	33.6919	0.143	0.0016254	-0.317856	0.0168912	5.398e-79	0.01826	2.423e-67	913	FALSE	1
	cg26266427-chr6:32431965:SNP	cg26266427	Body	NM_019105	TNXB	Island	chr6	32063838	chr6:32431965:SNP	rs9268896	368127	-0.172102	0.0136099	1.188e-36	14315	A	G	0.2563	0.0316	TRUE	21	---?+--???-?--?-----???-????--??----	43.3	35.282	0.01865	0.0030217	-0.169315	0.0189141	3.498e-19	0.0240093	7.602e-13	913	FALSE	1
	cg26266427-chr6:31325521:SNP	cg26266427	Body	NM_019105	TNXB	Island	chr6	32063838	chr6:31325521:SNP	rs9266237	738317	-0.151837	0.0133549	5.944e-30	12265	G	C	0.3415	0.0372	TRUE	16	?++??++???+??+??++++??++?????+???+++	0	13.518	0.5624	0	-0.151837	0.0133549	5.944e-30	0.0133549	5.944e-30	913	FALSE	1
	cg26266427-chr6:32756457:SNP	cg26266427	Body	NM_019105	TNXB	Island	chr6	32063838	chr6:32756457:SNP	rs13198082	692619	0.22647	0.0186341	5.494e-34	21453	T	C	0.0767	0.0144	TRUE	28	+++?+++++++?++?+-+++?++++???++?+++-+	30.9	39.0698	0.06244	0.0044336	0.211611	0.0235448	2.527e-19	0.0269641	4.505e-17	913	FALSE	1
	cg26266427-chr6:32287754:SNP	cg26266427	Body	NM_019105	TNXB	Island	chr6	32063838	chr6:32287754:SNP	rs9268231	223916	-0.211252	0.0136345	3.809e-54	17650	C	T	0.189	0.0219	TRUE	25	+++?-+++?++?++?+++++?+?++????+?+++++	17.9	29.2368	0.2113	0.0010299	-0.211424	0.0154812	1.839e-42	0.0166095	4.653e-37	913	FALSE	1
	cg26266427-chr6:32593085:SNP	cg26266427	Body	NM_019105	TNXB	Island	chr6	32063838	chr6:32593085:SNP	rs9271696	529247	-0.193109	0.0166183	0	7680	C	T	0.3815	0.0186	TRUE	12	?++???+???+??+??++++?????????????+++	31.3	16.0192	0.1404	0.0015648	-0.195166	0.0210668	1.966e-20	0.0242011	1.471e-15	913	FALSE	1
	cg26266427-chr6:32747542:SNP	cg26266427	Body	NM_019105	TNXB	Island	chr6	32063838	chr6:32747542:SNP	rs2621408	683704	0.124222	0.0099905	1.71e-35	20964	C	G	0.3784	0.0263	TRUE	27	+++?+++++++?++?+-+++?+++????++?+++++	4.5	27.2378	0.3969	0.0001308	0.12391	0.0103392	4.287e-33	0.0104662	1.717e-32	913	FALSE	1
	cg26266427-chr6:32573877:SNP	cg26266427	Body	NM_019105	TNXB	Island	chr6	32063838	chr6:32573877:SNP	rs614348	510039	0.194122	0.0110731	8.31e-69	17617	C	T	0.3804	0.0361	TRUE	22	---?---??-??--?------?-?????-??---+-	35.5	32.5564	0.05137	0.001522	0.189637	0.0146109	1.606e-38	0.0171667	1.197e-29	913	FALSE	1
	cg26266427-chr6:30618906:SNP	cg26266427	Body	NM_019105	TNXB	Island	chr6	32063838	chr6:30618906:SNP	rs9262135		-0.19993	0.0159251	3.762e-36	17089	G	A	0.136	0.0231	FALSE	24	+++?++++?++?++?+++++?+?-?????+?+++-+	33.1	34.3704	0.05999	0.0030682	-0.190932	0.0205685	1.652e-20	0.023798	4.422e-17	913	FALSE	1
	cg26266427-chr6:32379047:SNP	cg26266427	Body	NM_019105	TNXB	Island	chr6	32063838	chr6:32379047:SNP	rs5007260	315209	-0.172244	0.0106364	5.576e-59	17651	G	A	0.4776	0.0229	TRUE	25	+++?++++?++?++?+++++?+?++????+?+++++	30.2	34.3977	0.07784	0.001242	-0.17373	0.0131981	1.429e-39	0.0152445	1.331e-29	913	FALSE	1
	cg26266427-chr6:32605216:SNP	cg26266427	Body	NM_019105	TNXB	Island	chr6	32063838	chr6:32605216:SNP	rs1047985	541378	-0.233523	0.0162099	4.731e-47	10280	A	G	0.2413	0.0171	TRUE	15	---?-?-??-??--?---??????????-???-?--	51.8	29.066	0.01024	0.0043798	-0.230513	0.0249631	2.604e-20	0.0336541	3.951e-12	913	FALSE	1
	cg26266427-chr6:31305206:SNP	cg26266427	Body	NM_019105	TNXB	Island	chr6	32063838	chr6:31305206:SNP	rs28367816	758632	-0.141464	0.0107817	2.505e-39	17037	C	G	0.5066	0.0424	TRUE	22	---?---???-?--?-----??--????--??----	17.3	25.3953	0.2305	0.0005495	-0.142544	0.0123001	4.693e-31	0.0130383	1.997e-27	913	FALSE	1
	cg26266427-chr6:31352973:SNP	cg26266427	Body	NM_019105	TNXB	Island	chr6	32063838	chr6:31352973:SNP	rs2442748	710865	0.204629	0.0184937	0	20037	G	A	0.0918	0.0307	TRUE	26	---?--?-?--?--?-----?----???--?-----	7	26.8714	0.3623	0.0006777	0.20416	0.01946	9.474e-26	0.0198781	7.483e-25	913	FALSE	1
	cg26266427-chr6:32674952:SNP	cg26266427	Body	NM_019105	TNXB	Island	chr6	32063838	chr6:32674952:SNP	rs9275521	611114	-0.133672	0.0107561	1.853e-35	17649	T	C	0.4016	0.0281	TRUE	25	---?----?-+?-+?-----?-?-????--?-----	50.3	48.3007	0.002316	0.0029667	-0.136363	0.0159402	1.182e-17	0.021647	6.613e-10	913	FALSE	1
	cg26266427-chr6:32591777:SNP	cg26266427	Body	NM_019105	TNXB	Island	chr6	32063838	chr6:32591777:SNP	rs9271620	527939	0.148138	0.0110014	2.498e-41	16338	T	G	0.4858	0.0356	TRUE	23	+++?++++?++?++?+++++???++???+???++++	28.6	30.8287	0.09967	0.001135	0.148634	0.0135219	4.171e-28	0.0154163	7.31e-22	913	FALSE	1
	cg26266427-chr6:32796653:SNP	cg26266427	Body	NM_019105	TNXB	Island	chr6	32063838	chr6:32796653:SNP	rs241449	732815	0.147846	0.0102607	4.542e-47	24642	A	C	0.2563	0.0251	TRUE	31	++++++++-++?++++++++?++++???++++++++	8.6	32.8343	0.3298	0.0003132	0.147646	0.0109312	1.426e-41	0.0112301	1.392e-39	913	FALSE	1
	cg26266427-chr6:31462672:SNP	cg26266427	Body	NM_019105	TNXB	Island	chr6	32063838	chr6:31462672:SNP	rs2534684	601166	-0.191589	0.0096763	2.986e-87	24603	C	A	0.3153	0.0223	TRUE	31	+++++++++++?++++++++?++++???++++++++	36	46.876	0.02559	0.0016587	-0.193906	0.0127086	1.459e-52	0.0151195	8.494e-37	913	FALSE	1
	cg26266427-chr6:31673895:SNP	cg26266427	Body	NM_019105	TNXB	Island	chr6	32063838	chr6:31673895:SNP	rs12525100	389943	0.448043	0.0337434	3.108e-40	17808	T	A	0.0295	0.0101	TRUE	23	----?-???--?--?----??---????--?-----	19.2	27.2157	0.2031	0.0064338	0.453133	0.0396165	2.7e-30	0.0417432	7.101e-27	913	FALSE	1
	cg26266427-chr6:32752685:SNP	cg26266427	Body	NM_019105	TNXB	Island	chr6	32063838	chr6:32752685:SNP	rs13204139	688847	0.227872	0.0188021	8.328e-34	20970	A	G	0.077	0.0145	TRUE	27	+++?+++++++?++?+-+++?++++????+?+++-+	31	37.6856	0.06475	0.004379	0.213537	0.0237877	2.788e-19	0.0272527	6.195e-17	913	FALSE	1
	cg26266427-chr6:31289535:SNP	cg26266427	Body	NM_019105	TNXB	Island	chr6	32063838	chr6:31289535:SNP	rs9265184	774303	-0.117445	0.0115273	0	16217	C	T	0.3798	0.0427	TRUE	21	+++?++????+?++?+++++??++????++??++-+	49.1	39.3313	0.006062	0.0027895	-0.123939	0.0174318	1.161e-12	0.0226691	2.209e-07	913	FALSE	1
	cg26266427-chr6:31442449:SNP	cg26266427	Body	NM_019105	TNXB	Island	chr6	32063838	chr6:31442449:SNP	rs34346286	621389	0.367394	0.0467544	0	15775	A	G	0.0154	0.0042	TRUE	19	++??++?++++?+??++++??+++?????+?+???-	29.3	25.449	0.113	0.0183275	0.361886	0.060261	1.91e-09	0.0661029	2.73e-08	913	FALSE	1
	cg26266427-chr6:30899650:SNP	cg26266427	Body	NM_019105	TNXB	Island	chr6	32063838	chr6:30899650:SNP	rs3095152		-0.183517	0.0149951	0	17092	A	G	0.1547	0.0254	FALSE	24	---?+---?--?--?-----?-?+?????-?+--+-	34.7	35.1951	0.04974	0.0029154	-0.172127	0.0195613	1.376e-18	0.0229459	1.266e-15	913	FALSE	1
	cg26266427-chr6:32570982:SNP	cg26266427	Body	NM_019105	TNXB	Island	chr6	32063838	chr6:32570982:SNP	rs9270863	507144	-0.145935	0.014729	3.844e-23	9728	A	G	0.3811	0.039	TRUE	15	---?-?-?????--?---?-????????-???-?--	31.5	20.4275	0.1172	0.0015375	-0.141857	0.0186596	2.907e-14	0.0214913	1.118e-11	913	FALSE	1
	cg26266427-chr6:32754409:SNP	cg26266427	Body	NM_019105	TNXB	Island	chr6	32063838	chr6:32754409:SNP	rs2621394	690571	0.116415	0.0099667	1.605e-31	20951	A	G	0.3853	0.0294	TRUE	27	+++?-++++++?++?+-+++?++++????+?+++++	19.4	32.2744	0.1842	0.0006599	0.115153	0.0115185	1.568e-23	0.0123719	4.977e-21	913	FALSE	1
	cg26266427-chr6:30755067:SNP	cg26266427	Body	NM_019105	TNXB	Island	chr6	32063838	chr6:30755067:SNP	rs3131041		-0.19189	0.0156024	9.199e-35	16698	T	C	0.1427	0.0224	FALSE	24	---??---?--?--?-----?-?+-???--?+?---	45.7	42.3426	0.008279	0.0050067	-0.17949	0.0224971	1.483e-15	0.0287237	2.381e-11	913	FALSE	1
	cg26266427-chr6:31313391:SNP	cg26266427	Body	NM_019105	TNXB	Island	chr6	32063838	chr6:31313391:SNP	rs9265900	750447	0.131791	0.011175	4.224e-32	17037	G	A	0.3767	0.0496	TRUE	22	---?---???-?--?-----??--????--??--+-	49	41.2088	0.005283	0.0027115	0.132674	0.0166521	1.62e-15	0.021929	1.857e-09	913	FALSE	1
	cg26266427-chr6:32605478:SNP	cg26266427	Body	NM_019105	TNXB	Island	chr6	32063838	chr6:32605478:SNP	rs9272450	541640	-0.228873	0.0161639	1.631e-45	9599	T	C	0.2679	0.0253	TRUE	13	-???-?-??-??--?-?-??????????-??--?--	28	16.6688	0.1625	0.0013639	-0.227007	0.0198756	3.27e-30	0.0224527	2.119e-24	913	FALSE	1
	cg26266427-chr6:32332322:SNP	cg26266427	Body	NM_019105	TNXB	Island	chr6	32063838	chr6:32332322:SNP	rs3129916	268484	-0.201896	0.0136609	0	17169	A	G	0.1952	0.0195	TRUE	24	---?+---?--?--?-----?-?-?????-?-----	20.2	28.821	0.1863	0.0011516	-0.201697	0.01577	1.866e-37	0.0171182	4.181e-32	913	FALSE	1
	cg26266427-chr6:32249177:SNP	cg26266427	Body	NM_019105	TNXB	Island	chr6	32063838	chr6:32249177:SNP	rs9268116	185339	-0.204332	0.0124668	2.251e-60	18138	G	A	0.2305	0.0217	TRUE	26	+++?++++?++?++?-++++?+?++???++?+++++	15.5	29.6025	0.2395	0.0007544	-0.204361	0.0138881	5.183e-49	0.014762	1.426e-43	913	FALSE	1
	cg26266427-chr6:32784753:SNP	cg26266427	Body	NM_019105	TNXB	Island	chr6	32063838	chr6:32784753:SNP	rs2071470	720915	0.126407	0.0099015	2.524e-37	24642	C	T	0.2876	0.0259	TRUE	31	--------+--?--------?----???--------	19.9	37.4332	0.1649	0.0007653	0.125082	0.0114625	1.007e-27	0.0123548	1.434e-24	913	FALSE	1
	cg26266427-chr6:32586995:SNP	cg26266427	Body	NM_019105	TNXB	Island	chr6	32063838	chr6:32586995:SNP	rs9271370	523157	0.14621	0.0163995	4.854e-19	9508	C	T	0.2787	0.0483	TRUE	15	?--??--???-??-??----???-?????-???---	18.9	17.2725	0.2419	0.0009633	0.144944	0.0186982	9.063e-15	0.0202328	4.96e-13	913	FALSE	1
	cg26266427-chr6:31346621:SNP	cg26266427	Body	NM_019105	TNXB	Island	chr6	32063838	chr6:31346621:SNP	rs2442736	717217	-0.198441	0.0123172	2.137e-58	18703	C	G	0.2298	0.0198	TRUE	24	---?--?-?--?--?-----?---????--?-?---	0	20.9013	0.5871	0	-0.198441	0.0123172	2.137e-58	0.0123172	2.137e-58	913	FALSE	1
	cg26266427-chr6:32602958:SNP	cg26266427	Body	NM_019105	TNXB	Island	chr6	32063838	chr6:32602958:SNP	rs9272250	539120	-0.237164	0.0123674	5.815e-82	16286	T	A	0.2655	0.0235	TRUE	20	+++?+?++?+??++?+++++??+?????+???++++	28.9	26.726	0.1112	0.0012842	-0.236594	0.0155188	1.76e-52	0.0173964	2.552e-42	913	FALSE	1
	cg26266427-chr6:32602617:SNP	cg26266427	Body	NM_019105	TNXB	Island	chr6	32063838	chr6:32602617:SNP	rs9272231	538779	0.127334	0.0145429	2.028e-18	9758	C	T	0.4831	0.0427	TRUE	15	---?-?-?????--?+--?-????????-???-?--	39.2	23.0389	0.05964	0.0021155	0.122563	0.019792	5.919e-10	0.0239323	1.034e-07	913	FALSE	1
	cg26266427-chr6:32665367:SNP	cg26266427	Body	NM_019105	TNXB	Island	chr6	32063838	chr6:32665367:SNP	rs2646998	601529	-0.126363	0.0107763	9.373e-32	17655	T	G	0.4012	0.0261	TRUE	25	---?----?-+?-+?-----?-?--????-?-----	48.4	46.5366	0.003814	0.0027617	-0.127754	0.0156691	3.542e-16	0.0208955	1.472e-09	913	FALSE	1
	cg26266427-chr6:32609456:SNP	cg26266427	Body	NM_019105	TNXB	Island	chr6	32063838	chr6:32609456:SNP	rs28383457	545618	0.142864	0.0162888	0	8745	T	C	0.3288	0.0363	TRUE	13	+++?+?+?????++?+?+??????????+???+?-+	42.2	20.7673	0.05389	0.0026252	0.137325	0.0228779	1.943e-09	0.0281895	4.021e-07	913	FALSE	1
	cg26266427-chr6:31819123:SNP	cg26266427	Body	NM_019105	TNXB	Island	chr6	32063838	chr6:31819123:SNP	rs9501157	244715	0.473427	0.0319243	0	19388	A	G	0.0276	0.0075	TRUE	26	++++++?+++??++?+++++?++++????+?++++-	0	21.1095	0.6865	0	0.473427	0.0319243	9.416e-50	0.0319243	9.416e-50	913	FALSE	1
	cg26266427-chr6:30226305:SNP	cg26266427	Body	NM_019105	TNXB	Island	chr6	32063838	chr6:30226305:SNP	rs3094076		-0.150322	0.0142574	5.447e-26	17551	T	C	0.1643	0.0215	FALSE	25	---?----?--?--?-----?+?+????--?---+-	29	33.789	0.08849	0.0021065	-0.143404	0.0176382	4.28e-16	0.0200727	6.946e-14	913	FALSE	1
	cg26266427-chr6:32196805:SNP	cg26266427	Body	NM_019105	TNXB	Island	chr6	32063838	chr6:32196805:SNP	rs9404942	132967	0.285646	0.0261853	1.048e-27	17169	T	C	0.0481	0.0153	TRUE	24	+++?++++?++?+-?+++++?+?+?????+?+++++	29.9	32.7985	0.08464	0.0070944	0.280626	0.0322457	3.24e-18	0.0373408	2.014e-14	913	FALSE	1
	cg26266427-chr6:30666445:INDEL	cg26266427	Body	NM_019105	TNXB	Island	chr6	32063838	chr6:30666445:INDEL	chr6:30666445:INDEL		-0.197193	0.0178925	3.029e-28	13721	D	I	0.1357	0.0257	FALSE	21	---?---???-??-?-----?-?+????--??--+-	25.5	26.8458	0.1397	0.0023626	-0.190307	0.0218557	3.109e-18	0.024017	2.202e-16	913	FALSE	1
	cg26266427-chr6:32594775:SNP	cg26266427	Body	NM_019105	TNXB	Island	chr6	32063838	chr6:32594775:SNP	rs9271790	530937	-0.271602	0.0148528	1.065e-74	12804	A	G	0.2233	0.0232	TRUE	17	---?-?--?--?--?-?-??????????-??--?--	49.8	31.8864	0.01035	0.0037911	-0.267863	0.0218806	1.854e-34	0.0296002	4.487e-20	913	FALSE	1
	cg26266427-chr6:31068710:SNP	cg26266427	Body	NM_019105	TNXB	Island	chr6	32063838	chr6:31068710:SNP	rs2517557	995128	-0.13991	0.0102605	2.454e-42	20968	C	G	0.34	0.0198	TRUE	27	---?-------?--?+----?---????--?---+-	40.4	43.6342	0.01654	0.0019688	-0.140364	0.0140566	1.762e-23	0.0172196	4.472e-16	913	FALSE	1
	cg26266427-chr6:32591921:SNP	cg26266427	Body	NM_019105	TNXB	Island	chr6	32063838	chr6:32591921:SNP	rs9271624	528083	0.14085	0.011211	3.35e-36	18588	T	G	0.3241	0.0415	TRUE	23	+++?++++?++?++?+++++??++????+???++-+	23.9	28.9016	0.1477	0.0009273	0.138834	0.0134293	4.737e-25	0.014728	1.14e-21	913	FALSE	1
	cg26266427-chr6:32333837:INDEL	cg26266427	Body	NM_019105	TNXB	Island	chr6	32063838	chr6:32333837:INDEL	chr6:32333837:INDEL	269999	0.125013	0.0138105	1.403e-19	14674	D	I	0.2365	0.0334	TRUE	22	+++?+++???+?++?+++++?+?+????-+??+++-	26.5	28.5799	0.1245	0.0015403	0.120334	0.0167	5.778e-13	0.0187953	2.905e-11	913	FALSE	1
	cg26266427-chr6:32594341:SNP	cg26266427	Body	NM_019105	TNXB	Island	chr6	32063838	chr6:32594341:SNP	rs9271776	530503	0.122719	0.0138015	6.017e-19	11983	C	T	0.3356	0.0389	TRUE	16	---?-??-?--?--?-?-??????????-??--?+-	0.7	15.1037	0.444	2.16e-05	0.122679	0.0138693	9.122e-19	0.0138969	1.04e-18	913	FALSE	1
	cg26266427-chr6:31095596:INDEL	cg26266427	Body	NM_019105	TNXB	Island	chr6	32063838	chr6:31095596:INDEL	chr6:31095596:INDEL	968242	0.224381	0.0174623	8.667e-38	19821	I	D	0.0954	0.0163	TRUE	25	---?---?-?-??-------?---????---?+-+-	6.9	25.7649	0.3652	0.0005734	0.224777	0.0184063	2.683e-34	0.0187465	5.151e-33	913	FALSE	1
	cg26266427-chr6:32054934:SNP	cg26266427	Body	NM_019105	TNXB	Island	chr6	32063838	chr6:32054934:SNP	rs13201435	8904	0.60475	0.0219044	8.77e-168	24142	A	G	0.047	0.014	TRUE	30	+++++++++++?++++++++?+++????++++++++	41.8	49.7875	0.00952	0.0104966	0.597531	0.0302633	8.963e-87	0.0376057	3.448e-58	913	FALSE	1
	cg26266427-chr6:31088922:SNP	cg26266427	Body	NM_019105	TNXB	Island	chr6	32063838	chr6:31088922:SNP	rs2239520	974916	-0.146944	0.0092223	3.71e-57	24150	A	G	0.4	0.0343	TRUE	30	-----------?--------?---????--------	13.9	33.6998	0.2504	0.0004199	-0.147571	0.0102009	1.974e-47	0.0107169	8.677e-43	913	FALSE	1
	cg26266427-chr6:32409060:SNP	cg26266427	Body	NM_019105	TNXB	Island	chr6	32063838	chr6:32409060:SNP	rs6925852	345222	-0.233854	0.0136205	4.509e-66	17639	A	G	0.19	0.0209	TRUE	25	---?----?--?--?-----?-?-????--?-----	45.3	43.8892	0.007859	0.0038974	-0.235807	0.0192972	2.437e-34	0.0249081	6.075e-21	913	FALSE	1
	cg26266427-chr6:31448315:SNP	cg26266427	Body	NM_019105	TNXB	Island	chr6	32063838	chr6:31448315:SNP	rs2516424	615523	-0.155536	0.0103696	7.434e-51	20482	G	A	0.339	0.0177	TRUE	26	+++?+++++++?++?+++++?+++?????+?+++++	43	43.8318	0.01132	0.0021507	-0.159079	0.0145491	7.933e-28	0.0181808	1.179e-17	913	FALSE	1
	cg26266427-chr6:32444952:SNP	cg26266427	Body	NM_019105	TNXB	Island	chr6	32063838	chr6:32444952:SNP	rs7755901	381114	-0.177187	0.0171087	0	8790	C	T	0.2742	0.0364	TRUE	14	?++??++???+??+??++++???+?????????+++	22.3	16.7324	0.2118	0.0012075	-0.177797	0.0200555	7.633e-19	0.0220208	8.53e-16	913	FALSE	1
	cg26266427-chr6:31319226:SNP	cg26266427	Body	NM_019105	TNXB	Island	chr6	32063838	chr6:31319226:SNP	rs2442729	744612	-0.268198	0.0139514	2.344e-82	17877	T	C	0.1694	0.0189	TRUE	23	---?---?+?-?--?-----??--?????-?-----	51.7	45.5691	0.002246	0.0049322	-0.266278	0.0215204	3.645e-35	0.0288979	1.681e-20	913	FALSE	1
	cg26266427-chr6:31305995:SNP	cg26266427	Body	NM_019105	TNXB	Island	chr6	32063838	chr6:31305995:SNP	rs28752962	757843	-0.147299	0.0101172	5.103e-48	19315	A	G	0.5026	0.0385	TRUE	24	---?----?--?--?-----??--????--??----	10.7	25.7502	0.3128	0.0003003	-0.147987	0.0109614	1.549e-41	0.011327	1.157e-38	913	FALSE	1
	cg26266427-chr6:31368588:SNP	cg26266427	Body	NM_019105	TNXB	Island	chr6	32063838	chr6:31368588:SNP	rs2844523	695250	0.210584	0.018201	5.855e-31	20411	A	G	0.0918	0.0301	TRUE	26	+++?++++?++?++?+++++?++++????+?+++++	18.1	30.517	0.2055	0.0019328	0.209592	0.0207527	5.552e-24	0.0222176	2.586e-21	913	FALSE	1
	cg26266427-chr6:32398975:SNP	cg26266427	Body	NM_019105	TNXB	Island	chr6	32063838	chr6:32398975:SNP	rs4988822	335137	-0.153846	0.0114722	0	18135	T	C	0.3107	0.0363	TRUE	26	---?----?--?--?-----?-?--???--?-----	39.9	41.6062	0.0198	0.0023053	-0.153433	0.0154698	3.469e-23	0.0190925	7.759e-16	913	FALSE	1
	cg26266427-chr6:32424677:SNP	cg26266427	Body	NM_019105	TNXB	Island	chr6	32063838	chr6:32424677:SNP	rs9268815	360839	-0.156459	0.0111858	1.866e-44	16559	A	T	0.4152	0.0373	TRUE	24	---?----?--?--?--?--?-?-????--?-----	11.7	26.0578	0.2981	0.0004052	-0.156503	0.012125	4.087e-38	0.012673	5.13e-35	913	FALSE	1
	cg26266427-chr6:31945467:SNP	cg26266427	Body	NM_019105	TNXB	Island	chr6	32063838	chr6:31945467:SNP	rs142446892	118371	0.584553	0.0576487	3.674e-24	9399	T	G	0.0147	0.0026	TRUE	13	???+?+?++?+?+??++?+??+++????+???????	44	21.4449	0.04423	0.0381059	0.587345	0.0869083	1.397e-11	0.103023	1.395e-08	913	FALSE	1
	cg26266427-chr6:31605167:SNP	cg26266427	Body	NM_019105	TNXB	Island	chr6	32063838	chr6:31605167:SNP	rs2255741	458671	0.379602	0.0300401	1.328e-36	19486	A	G	0.0331	0.0116	TRUE	25	+++?+-++++??++?+++++?++++????+?+++-?	11.7	27.194	0.2955	0.0030431	0.375478	0.0325381	8.325e-31	0.0340379	6.975e-29	913	FALSE	1
	cg26266427-chr6:31103604:SNP	cg26266427	Body	NM_019105	TNXB	Island	chr6	32063838	chr6:31103604:SNP	rs3094667	960234	0.15949	0.0096574	2.875e-61	24073	T	C	0.3473	0.034	TRUE	30	+++++++++++?++++++++?+++????++++++-+	28.1	40.3177	0.07888	0.0011085	0.160221	0.0118628	1.438e-41	0.0134264	1.525e-32	913	FALSE	1
	cg26266427-chr6:32770125:SNP	cg26266427	Body	NM_019105	TNXB	Island	chr6	32063838	chr6:32770125:SNP	rs2199873	706287	0.117667	0.0097012	7.401e-34	24642	G	A	0.3081	0.0349	TRUE	31	--------+--?--------?---+???--------	26.2	40.6642	0.09263	0.001054	0.116192	0.0117861	6.308e-23	0.0131497	3.611e-19	913	FALSE	1
	cg26266427-chr6:32171134:INDEL	cg26266427	Body	NM_019105	TNXB	Island	chr6	32063838	chr6:32171134:INDEL	chr6:32171134:INDEL	107296	-0.298901	0.0144345	2.97e-95	17431	I	D	0.1579	0.0179	TRUE	23	+++?+++???+?++?+++++?+++????++??++++	7.6	23.8059	0.3575	0.0004056	-0.29969	0.0153647	9.924e-85	0.0156193	1.252e-81	913	FALSE	1
	cg26266427-chr6:31458634:SNP	cg26266427	Body	NM_019105	TNXB	Island	chr6	32063838	chr6:31458634:SNP	rs3873412	605204	-0.140347	0.0110455	5.458e-37	18872	C	T	0.3193	0.028	TRUE	24	+++?+++?+?+?++++++++??++????-+??++++	49.9	45.8712	0.003103	0.0029839	-0.144064	0.0166192	4.376e-18	0.022029	1.878e-10	913	FALSE	1
	cg26266427-chr6:31816872:INDEL	cg26266427	Body	NM_019105	TNXB	Island	chr6	32063838	chr6:31816872:INDEL	chr6:31816872:INDEL	246966	0.305455	0.0295104	4.153e-25	11748	D	I	0.0509	0.0066	TRUE	16	?++??+????+??+??++++?+++?????+???+-+	0	7.24724	0.9504	0	0.305455	0.0295104	4.153e-25	0.0295104	4.153e-25	913	FALSE	1
	cg26266427-chr6:32385470:SNP	cg26266427	Body	NM_019105	TNXB	Island	chr6	32063838	chr6:32385470:SNP	rs3135376	321632	-0.238211	0.0138479	2.568e-66	17169	G	A	0.1869	0.0211	TRUE	24	+++?++++?++?++?+++++?+?+?????+?+++++	45.1	41.9126	0.009294	0.0038418	-0.241623	0.019644	9.043e-35	0.0252349	3.737e-21	913	FALSE	1
	cg26266427-chr6:30763291:SNP	cg26266427	Body	NM_019105	TNXB	Island	chr6	32063838	chr6:30763291:SNP	rs3131060		-0.192216	0.0156481	1.109e-34	16721	A	G	0.1417	0.0242	FALSE	24	---?----?--?--?-----?-?+-????-?+?---	45.3	42.0432	0.008974	0.0049613	-0.180171	0.0225238	1.253e-15	0.0286042	1.819e-11	913	FALSE	1
	cg26266427-chr6:30166886:SNP	cg26266427	Body	NM_019105	TNXB	Island	chr6	32063838	chr6:30166886:SNP	rs2523720		-0.163988	0.015241	5.339e-27	16249	T	C	0.1525	0.0225	FALSE	23	---?----?--?--?-----?+?+?????-?-?-+-	33.8	33.2552	0.05837	0.0027863	-0.154267	0.0197178	5.129e-15	0.0230384	1.095e-12	913	FALSE	1
	cg26266427-chr6:32088105:SNP	cg26266427	Body	NM_019105	TNXB	Island	chr6	32063838	chr6:32088105:SNP	rs113023346	24267	0.496261	0.0308255	0	20556	A	G	0.0279	0.0076	TRUE	27	++++++?++++?++?+-+++?+++????++?+++++	0	23.4999	0.6045	0	0.496261	0.0308255	2.592e-58	0.0308255	2.592e-58	913	FALSE	1
	cg26266427-chr6:31777192:SNP	cg26266427	Body	NM_019105	TNXB	Island	chr6	32063838	chr6:31777192:SNP	rs553414	286646	-0.435295	0.014087	1.18e-209	23282	G	A	0.1241	0.0211	TRUE	29	++++++?++++?++++++++?+++????++++++++	25	37.3453	0.1114	0.0019618	-0.437871	0.0171355	5.03e-144	0.0187887	9.6e-119	913	FALSE	1
	cg26266427-chr6:32591841:SNP	cg26266427	Body	NM_019105	TNXB	Island	chr6	32063838	chr6:32591841:SNP	rs9271621	528003	0.139158	0.0154815	0	10084	A	T	0.313	0.0497	TRUE	13	?++???????+??+??++++??++?????????+-+	0	11.9639	0.4486	0	0.139158	0.0154815	2.503e-19	0.0154815	2.503e-19	913	FALSE	1
	cg26266427-chr6:31243830:SNP	cg26266427	Body	NM_019105	TNXB	Island	chr6	32063838	chr6:31243830:SNP	rs2524076	820008	-0.153128	0.0126084	6.109e-34	12987	G	A	0.4141	0.028	TRUE	17	?++??++???+??+??++++??++?????+?+?+++	0	8.54938	0.9308	0	-0.153128	0.0126084	6.109e-34	0.0126084	6.109e-34	913	FALSE	1
	cg26266427-chr6:32566287:SNP	cg26266427	Body	NM_019105	TNXB	Island	chr6	32063838	chr6:32566287:SNP	rs28383173	502449	0.193158	0.0134871	0	11617	C	G	0.3927	0.0298	TRUE	17	+++?+?+??+??++?+++++????????+???+?-+	41.1	27.1814	0.03951	0.0022247	0.190877	0.0186883	1.722e-24	0.0229124	3.449e-17	913	FALSE	1
	cg26266427-chr6:32383441:SNP	cg26266427	Body	NM_019105	TNXB	Island	chr6	32063838	chr6:32383441:SNP	rs3135382	319603	-0.237566	0.0138395	4.789e-66	17169	G	T	0.187	0.0213	TRUE	24	+++?++++?++?++?+++++?+?+?????+?+++++	44.9	41.7574	0.009688	0.0038057	-0.241178	0.0195948	8.175e-35	0.0251261	3.232e-21	913	FALSE	1
	cg26266427-chr6:32389747:SNP	cg26266427	Body	NM_019105	TNXB	Island	chr6	32063838	chr6:32389747:SNP	rs3135362	325909	-0.230463	0.0135808	1.375e-64	17653	G	T	0.1911	0.0212	TRUE	25	+++?++++?++?++?+++++?+?+????++?+++++	45	43.6046	0.008478	0.0038203	-0.231699	0.0191949	1.506e-33	0.0246744	9.618e-21	913	FALSE	1
	cg26266427-chr6:32584772:SNP	cg26266427	Body	NM_019105	TNXB	Island	chr6	32063838	chr6:32584772:SNP	rs28752523	520934	0.235961	0.0140247	1.61e-63	16856	T	C	0.192	0.0222	TRUE	21	+++?++++?+??++?+++++??+?????+???++++	0	19.2383	0.5064	0	0.235961	0.0140247	1.61e-63	0.0140247	1.61e-63	913	FALSE	1
	cg26266427-chr6:31237802:SNP	cg26266427	Body	NM_019105	TNXB	Island	chr6	32063838	chr6:31237802:SNP	rs1050147	826036	-0.174747	0.0171387	2.066e-24	7485	A	G	0.3373	0.0258	TRUE	9	-???-??---??-??-????????????-??-????	36	12.5074	0.13	0.0015577	-0.175322	0.022438	5.558e-15	0.0267951	6.956e-11	913	FALSE	1
	cg26266427-chr6:32623193:SNP	cg26266427	Body	NM_019105	TNXB	Island	chr6	32063838	chr6:32623193:SNP	rs9273325	559355	-0.28391	0.0195003	5.099e-48	9323	A	G	0.1695	0.0156	TRUE	13	---?-????-??--?-?-??????????-???-?--	45.7	22.0831	0.0366	0.0043051	-0.277042	0.0281445	7.309e-23	0.0358855	2.542e-15	913	FALSE	1
	cg26266427-chr6:31308476:SNP	cg26266427	Body	NM_019105	TNXB	Island	chr6	32063838	chr6:31308476:SNP	rs2854019	755362	-0.32663	0.0145246	5.44e-112	19888	A	T	0.1391	0.0207	TRUE	25	---?-------?--?-----??--????--??----	20.7	30.2818	0.1756	0.0014171	-0.328004	0.0171091	6.431e-82	0.0183263	4.687e-71	913	FALSE	1
	cg26266427-chr6:31289684:SNP	cg26266427	Body	NM_019105	TNXB	Island	chr6	32063838	chr6:31289684:SNP	rs9265197	774154	-0.120092	0.0115322	2.148e-25	16196	C	G	0.3746	0.0415	TRUE	21	---?--????-?--?-----??--????--??--+-	44.8	36.2493	0.01438	0.0023487	-0.1265	0.0167395	4.125e-14	0.0209017	9.161e-09	913	FALSE	1
	cg26266427-chr6:32587923:SNP	cg26266427	Body	NM_019105	TNXB	Island	chr6	32063838	chr6:32587923:SNP	rs9271425	524085	-0.222946	0.0118722	1.127e-78	18013	G	A	0.2729	0.0388	TRUE	22	+++?+++??++?++?+++++??+?????+??+++++	58.8	50.9892	0.0002653	0.0045519	-0.218926	0.0197625	1.606e-28	0.0288265	1.042e-14	913	FALSE	1
	cg26266427-chr6:32203591:SNP	cg26266427	Body	NM_019105	TNXB	Island	chr6	32063838	chr6:32203591:SNP	rs2395107	139753	-0.144716	0.0110141	0	17124	A	G	0.3988	0.0279	TRUE	24	---?----?--?--?-----?-?-?????-?-----	0	15.7666	0.8651	0	-0.144716	0.0110141	1.963e-39	0.0110141	1.963e-39	913	FALSE	1
	cg26266427-chr6:32758607:INDEL	cg26266427	Body	NM_019105	TNXB	Island	chr6	32063838	chr6:32758607:INDEL	chr6:32758607:INDEL	694769	0.180757	0.0199522	1.311e-19	12264	D	I	0.126	0.0228	TRUE	16	?++??++???+??+??-+++??++?????+???+++	38.6	24.419	0.05831	0.0042199	0.173134	0.0275795	3.438e-10	0.0324808	2.621e-08	913	FALSE	1
	cg26266427-chr6:31319940:SNP	cg26266427	Body	NM_019105	TNXB	Island	chr6	32063838	chr6:31319940:SNP	rs28380931	743898	0.187725	0.0148396	0	17084	T	C	0.1639	0.0209	TRUE	22	+++?+++???+?++?+++++??++????++??++++	7.9	22.7983	0.3548	0.0004247	0.186833	0.0157408	1.709e-32	0.0161104	2.23e-31	913	FALSE	1
	cg26266427-chr6:32608915:SNP	cg26266427	Body	NM_019105	TNXB	Island	chr6	32063838	chr6:32608915:SNP	rs9272678	545077	-0.182338	0.0163746	8.438e-29	7414	C	T	0.4573	0.0197	TRUE	11	+???+?+?????++?+?+??????????+???+?++	49.5	19.8005	0.0312	0.0030382	-0.185558	0.0247479	6.483e-14	0.0324225	1.868e-08	913	FALSE	1
	cg26266427-chr6:31289946:SNP	cg26266427	Body	NM_019105	TNXB	Island	chr6	32063838	chr6:31289946:SNP	rs9265207	773892	-0.117321	0.0112156	1.311e-25	17082	T	G	0.3813	0.0415	TRUE	22	---?---???-?--?-----??--????--??--+-	42.8	36.7102	0.01817	0.0021334	-0.122848	0.0158734	1e-14	0.019606	2.178e-09	913	FALSE	1
	cg26266427-chr6:32599425:SNP	cg26266427	Body	NM_019105	TNXB	Island	chr6	32063838	chr6:32599425:SNP	rs9272069	535587	-0.253021	0.0132108	9.209e-82	15477	A	T	0.2377	0.0227	TRUE	21	---?-?--?--?--?-----????????-??-----	46	37.0089	0.01167	0.0031672	-0.252515	0.0188056	4.163e-41	0.0244459	4.173e-25	913	FALSE	1
	cg26266427-chr6:31096128:SNP	cg26266427	Body	NM_019105	TNXB	Island	chr6	32063838	chr6:31096128:SNP	rs3909111	967710	0.251814	0.0178248	2.585e-45	24131	C	G	0.0724	0.0108	TRUE	30	+++++++++++?++++++++?+++????++++-+--	40.1	48.4538	0.01318	0.0064945	0.260335	0.0242451	6.776e-27	0.0297821	2.786e-17	913	FALSE	1
	cg26266427-chr6:31276447:SNP	cg26266427	Body	NM_019105	TNXB	Island	chr6	32063838	chr6:31276447:SNP	rs1005599	787391	-0.195523	0.0111048	0	19853	G	C	0.28	0.0391	TRUE	25	+++?+++++++?++?+++++??++????++??++++	9.3	26.4524	0.3306	0.0003229	-0.195573	0.0119456	3.034e-60	0.0122396	1.918e-57	913	FALSE	1
	cg26266427-chr6:31325115:SNP	cg26266427	Body	NM_019105	TNXB	Island	chr6	32063838	chr6:31325115:SNP	rs9266218	738723	-0.149937	0.0110575	6.937e-42	17781	A	G	0.3503	0.0324	TRUE	23	---?---???-?--?-----??--????--?-----	18	26.8331	0.2176	0.000634	-0.148618	0.0126897	1.11e-31	0.0134867	1.032e-28	913	FALSE	1
	cg26266427-chr6:30781301:SNP	cg26266427	Body	NM_019105	TNXB	Island	chr6	32063838	chr6:30781301:SNP	rs886425		-0.191934	0.0150813	4.207e-37	17574	C	T	0.1466	0.0244	FALSE	25	+++?++++?++?++?+++++?+?-????++?-++++	43	42.0752	0.01266	0.0043604	-0.180129	0.0211928	1.904e-17	0.0264396	3.889e-13	913	FALSE	1
	cg26266427-chr6:32776590:SNP	cg26266427	Body	NM_019105	TNXB	Island	chr6	32063838	chr6:32776590:SNP	rs4513843	712752	-0.212892	0.0111012	5.714e-82	24638	C	G	0.2042	0.0209	TRUE	31	-----------?--------?----???--------	0	27.418	0.6012	0	-0.212892	0.0111012	5.714e-82	0.0111012	5.714e-82	913	FALSE	1
	cg26266427-chr6:32446674:SNP	cg26266427	Body	NM_019105	TNXB	Island	chr6	32063838	chr6:32446674:SNP	rs17203570	382836	0.136919	0.0121877	2.769e-29	13600	T	A	0.4461	0.0351	TRUE	20	---?---???-?--?-----???-????-???----	15.8	22.5598	0.2573	0.0005676	0.137406	0.0136266	6.521e-24	0.0144712	3.035e-21	913	FALSE	1
	cg26266427-chr6:32204952:SNP	cg26266427	Body	NM_019105	TNXB	Island	chr6	32063838	chr6:32204952:SNP	rs9267908	141114	-0.141719	0.0105229	2.423e-41	18141	A	G	0.4526	0.0402	TRUE	26	---?----?--?--?-----?-?--???--?-----	0	22.9927	0.578	0	-0.141719	0.0105229	2.423e-41	0.0105229	2.423e-41	913	FALSE	1
	cg26266427-chr6:32576726:SNP	cg26266427	Body	NM_019105	TNXB	Island	chr6	32063838	chr6:32576726:SNP	rs647467	512888	-0.217678	0.0197044	2.262e-28	5970	T	C	0.3097	0.0239	TRUE	11	?--??--??????-??----??????????????--	6.7	10.7148	0.3802	0.0003166	-0.217944	0.0206593	5.11e-26	0.0211128	6.335e-25	913	FALSE	1
	cg26266427-chr6:32602602:SNP	cg26266427	Body	NM_019105	TNXB	Island	chr6	32063838	chr6:32602602:SNP	rs9272230	538764	-0.250018	0.0118905	3.73e-98	18722	A	C	0.242	0.0247	TRUE	23	---?-?--?--?--?-----??-?-???-??-----	38.6	35.8353	0.03162	0.0020955	-0.250532	0.0160632	7.672e-55	0.0193681	4.017e-38	913	FALSE	1
	cg26266427-chr6:32314483:SNP	cg26266427	Body	NM_019105	TNXB	Island	chr6	32063838	chr6:32314483:SNP	rs3117132	250645	0.133192	0.0131636	4.585e-24	15880	T	C	0.2417	0.0337	TRUE	24	+++?+++???+?++?+++++?+?++???-+?++++-	34.6	35.1603	0.05014	0.0022307	0.128614	0.0169243	2.976e-14	0.0201233	3.621e-11	913	FALSE	1
	cg26266427-chr6:32569415:SNP	cg26266427	Body	NM_019105	TNXB	Island	chr6	32063838	chr6:32569415:SNP	rs9270803	505577	-0.197513	0.015557	0	9220	A	G	0.336	0.0297	TRUE	14	---???-?????--?---?-????????-???-?--	52	27.0684	0.01218	0.0037897	-0.191937	0.0239537	1.121e-15	0.0323927	1.078e-09	913	FALSE	1
	cg26266427-chr6:30296253:SNP	cg26266427	Body	NM_019105	TNXB	Island	chr6	32063838	chr6:30296253:SNP	rs3094064		-0.196825	0.0162961	1.38e-33	17092	A	G	0.1278	0.021	FALSE	24	---?----?--?--?-----?+?+?????-?---+-	26.3	31.1866	0.1183	0.0023117	-0.189719	0.0198498	1.204e-21	0.0220966	5.22e-19	913	FALSE	1
	cg26266427-chr6:31307157:SNP	cg26266427	Body	NM_019105	TNXB	Island	chr6	32063838	chr6:31307157:SNP	rs28753018	756681	-0.145569	0.0101313	8.183e-47	19321	T	C	0.5012	0.0379	TRUE	24	---?----?--?--?-----??--????--??----	10.1	25.5753	0.3213	0.000282	-0.146179	0.0109271	8.165e-41	0.0112657	3.407e-38	913	FALSE	1
	cg26266427-chr6:31332051:SNP	cg26266427	Body	NM_019105	TNXB	Island	chr6	32063838	chr6:31332051:SNP	rs2523551	731787	0.098856	0.0125562	3.46e-15	21454	G	A	0.1874	0.0334	TRUE	28	---?++-----?-+?-+---?----???--?----+	15.9	32.0949	0.2286	0.0008476	0.0974035	0.0141103	5.092e-12	0.0149256	3.513e-11	913	FALSE	1
	cg26266427-chr6:31270118:SNP	cg26266427	Body	NM_019105	TNXB	Island	chr6	32063838	chr6:31270118:SNP	rs9468937	793720	-0.149773	0.0099991	1.012e-50	20394	C	A	0.565	0.0361	TRUE	26	+++?-+++?++?++?+++++?+++????++?+++++	18	30.5003	0.2061	0.0005838	-0.149583	0.0114393	4.506e-39	0.012199	1.197e-34	913	FALSE	1
	cg26266427-chr6:31761063:SNP	cg26266427	Body	NM_019105	TNXB	Island	chr6	32063838	chr6:31761063:SNP	rs9469054	302775	0.370409	0.0348536	2.219e-26	18492	A	G	0.0265	0.0091	TRUE	23	++++++?+++??++?+-+++?+++?????+?+++??	17.5	26.6711	0.224	0.0060091	0.364715	0.0391937	1.334e-20	0.0422539	1.847e-18	913	FALSE	1
	cg26266427-chr6:32391307:INDEL	cg26266427	Body	NM_019105	TNXB	Island	chr6	32063838	chr6:32391307:INDEL	chr6:32391307:INDEL	327469	-0.218144	0.0259172	3.864e-17	5166	D	I	0.1849	0.0354	TRUE	7	-???-???????-??-?????-??????-???-???	0	5.1858	0.5202	0	-0.218144	0.0259172	3.864e-17	0.0259172	3.864e-17	913	FALSE	1
	cg26266427-chr6:32413259:SNP	cg26266427	Body	NM_019105	TNXB	Island	chr6	32063838	chr6:32413259:SNP	rs2213584	349421	-0.148798	0.0109244	0	17652	A	G	0.4016	0.0394	TRUE	25	---?----?--?--?-----?-?--????-?-----	35	36.9019	0.04476	0.0016261	-0.150627	0.0140948	1.175e-26	0.0167971	8.107e-19	913	FALSE	1
	cg26266427-chr6:32674700:SNP	cg26266427	Body	NM_019105	TNXB	Island	chr6	32063838	chr6:32674700:SNP	rs9275518	610862	-0.138695	0.0105292	0	18140	G	A	0.429	0.029	TRUE	26	+++?++++?++?+-?+++++?+?++???++?+++++	40.7	42.1608	0.01727	0.0020033	-0.139905	0.0142296	8.201e-23	0.0177567	5.681e-15	913	FALSE	1
	cg26266427-chr6:32676139:SNP	cg26266427	Body	NM_019105	TNXB	Island	chr6	32063838	chr6:32676139:SNP	rs9275540	612301	-0.13697	0.0107317	2.634e-37	17384	T	A	0.4335	0.0282	TRUE	25	+++?++++?++?+-?+++++?+?++???++??++++	40.5	40.3314	0.0197	0.0019857	-0.138589	0.0144992	1.196e-21	0.0180343	3.079e-14	913	FALSE	1
	cg26266427-chr6:32589959:SNP	cg26266427	Body	NM_019105	TNXB	Island	chr6	32063838	chr6:32589959:SNP	rs9271535	526121	-0.152577	0.0110744	3.481e-43	18017	T	C	0.3441	0.0402	TRUE	22	---?-?--?--?--?-----??--????-???----	52.8	44.5117	0.002006	0.0030998	-0.155038	0.0172097	2.083e-19	0.0234733	8.03e-11	913	FALSE	1
	cg26266427-chr6:32282471:SNP	cg26266427	Body	NM_019105	TNXB	Island	chr6	32063838	chr6:32282471:SNP	rs9268215	218633	-0.201427	0.0123896	0	18144	G	A	0.2358	0.0231	TRUE	26	+++?++++?++?++?-++++?+?++???++?+++++	8.2	27.2417	0.3439	0.0003629	-0.201424	0.0131101	2.852e-53	0.0135005	2.444e-50	913	FALSE	1
	cg26266427-chr6:32449726:SNP	cg26266427	Body	NM_019105	TNXB	Island	chr6	32063838	chr6:32449726:SNP	rs2187822	385888	0.127293	0.012569	0	12606	C	A	0.4779	0.0362	TRUE	18	---?--????-?--?-?+--???-????-???----	37.9	27.3965	0.0525	0.0017735	0.127112	0.0166437	2.219e-14	0.0202556	3.292e-10	913	FALSE	1
	cg26266427-chr6:31084288:SNP	cg26266427	Body	NM_019105	TNXB	Island	chr6	32063838	chr6:31084288:SNP	rs1042126	979550	-0.136476	0.0090829	4.991e-51	24641	T	C	0.5082	0.0388	TRUE	31	-----------?--------?----???------+-	0	27.4953	0.5972	0	-0.136476	0.0090829	4.991e-51	0.0090829	4.991e-51	913	FALSE	1
	cg26266427-chr6:31598037:SNP	cg26266427	Body	NM_019105	TNXB	Island	chr6	32063838	chr6:31598037:SNP	rs35700586	465801	0.493583	0.050751	2.346e-22	12863	A	T	0.0142	0.003	TRUE	15	+??+?+?++++?+??++?+???++?????+?????+	41	23.7388	0.04926	0.0289375	0.494854	0.0727095	1.004e-11	0.086055	9.713e-09	913	FALSE	1
	cg26266427-chr6:32177671:INDEL	cg26266427	Body	NM_019105	TNXB	Island	chr6	32063838	chr6:32177671:INDEL	chr6:32177671:INDEL	113833	-0.189968	0.0154499	0	12265	D	I	0.2063	0.0223	TRUE	16	?--??--???-??-??----??--?????-???---	0	12.1916	0.6645	0	-0.189968	0.0154499	9.55e-35	0.0154499	9.55e-35	913	FALSE	1
	cg26266427-chr6:30181567:INDEL	cg26266427	Body	NM_019105	TNXB	Island	chr6	32063838	chr6:30181567:INDEL	chr6:30181567:INDEL		-0.164717	0.0159777	6.405e-25	14607	I	D	0.1536	0.0253	FALSE	22	+++?+++???+?++?+++++?-?-????++??++-+	29.6	29.8337	0.09538	0.0024129	-0.156402	0.0199955	5.205e-15	0.0226988	3.968e-13	913	FALSE	1
	cg26266427-chr6:32594441:SNP	cg26266427	Body	NM_019105	TNXB	Island	chr6	32063838	chr6:32594441:SNP	rs3129766	530603	0.122969	0.0134981	8.23e-20	12247	G	A	0.3439	0.0312	TRUE	17	---?-?--?--?--?---??????????-???-?+-	41.8	27.5056	0.03619	0.0022897	0.122491	0.0188126	7.461e-11	0.0232045	1.162e-07	913	FALSE	1
	cg26266427-chr6:32140277:SNP	cg26266427	Body	NM_019105	TNXB	Island	chr6	32063838	chr6:32140277:SNP	rs3130348	76439	-0.131598	0.0119894	4.973e-28	20482	A	C	0.2181	0.0307	TRUE	26	---?-------?--?+----?---?????-?-----	9.4	27.5828	0.3274	0.0003949	-0.131244	0.012889	2.37e-24	0.013228	2.562e-23	913	FALSE	1
	cg26266427-chr6:30968769:SNP	cg26266427	Body	NM_019105	TNXB	Island	chr6	32063838	chr6:30968769:SNP	rs1632863		-0.224424	0.0153045	1.098e-48	17406	G	C	0.1496	0.0419	FALSE	25	+++?+++++++?++?+++++?+?-????++??++-+	31.5	35.0259	0.06802	0.00275	-0.219299	0.0196494	6.359e-29	0.0223356	9.396e-24	913	FALSE	1
	cg26266427-chr6:32410087:SNP	cg26266427	Body	NM_019105	TNXB	Island	chr6	32063838	chr6:32410087:SNP	rs16822618	346249	0.232388	0.0205756	1.399e-29	18145	C	T	0.0778	0.0189	TRUE	26	---?----?--?--?-----?-?--???--?----+	0	19.2964	0.7827	0	0.232388	0.0205756	1.399e-29	0.0205756	1.399e-29	913	FALSE	1
	cg26266427-chr6:31083797:INDEL	cg26266427	Body	NM_019105	TNXB	Island	chr6	32063838	chr6:31083797:INDEL	chr6:31083797:INDEL	980041	-0.133164	0.0115811	1.344e-30	14988	I	D	0.511	0.0286	TRUE	18	?++??++???+??++?++++??++?????++??+-+	19.4	21.0905	0.2223	0.0005992	-0.13328	0.0134343	3.379e-23	0.0143677	1.891e-20	913	FALSE	1
	cg26266427-chr6:32561201:SNP	cg26266427	Body	NM_019105	TNXB	Island	chr6	32063838	chr6:32561201:SNP	rs28366314	497363	0.13294	0.0118229	2.471e-29	16589	G	A	0.325	0.0393	TRUE	23	---?-------?-+?-----????????-??---+-	14	25.5938	0.2695	0.000534	0.132583	0.0130485	2.967e-24	0.0137542	4.229e-22	913	FALSE	1
	cg26266427-chr6:32575493:SNP	cg26266427	Body	NM_019105	TNXB	Island	chr6	32063838	chr6:32575493:SNP	rs486912	511655	-0.201269	0.0130129	5.805e-54	13017	G	C	0.3435	0.0308	TRUE	19	+++??++??+??++?+++++???+????+??++?++	38.5	29.2456	0.04546	0.0020533	-0.198894	0.0174073	3.104e-30	0.0211428	1.74e-21	913	FALSE	1
	cg26266427-chr6:32672439:SNP	cg26266427	Body	NM_019105	TNXB	Island	chr6	32063838	chr6:32672439:SNP	rs1794528	608601	-0.368115	0.015266	0	17295	C	T	0.1421	0.0178	TRUE	24	+++?++++?++?++?+++++???+????++?+++++	38.7	37.536	0.02855	0.0035843	-0.36798	0.0203258	2.961e-73	0.0249142	2.113e-49	913	FALSE	1
	cg26266427-chr6:31466885:SNP	cg26266427	Body	NM_019105	TNXB	Island	chr6	32063838	chr6:31466885:SNP	rs2855817	596953	-0.19177	0.0096569	9.344e-88	24617	A	G	0.3167	0.0219	TRUE	31	-----------?--------?----???--------	34.8	46.0464	0.03076	0.0015708	-0.19392	0.0125633	9.457e-54	0.0148222	2.746e-38	913	FALSE	1
	cg26266427-chr6:32587812:SNP	cg26266427	Body	NM_019105	TNXB	Island	chr6	32063838	chr6:32587812:SNP	rs9271416	523974	0.143151	0.0115407	2.485e-35	17430	A	G	0.3278	0.0382	TRUE	22	+++?++++?+??++?+++++??++????+???++-+	27.5	28.9723	0.1147	0.0011404	0.140772	0.0142701	5.912e-23	0.015922	2.454e-19	913	FALSE	1
	cg26266427-chr6:32025870:SNP	cg26266427	Body	NM_019105	TNXB	Island	chr6	32063838	chr6:32025870:SNP	rs2066982	37968	0.608182	0.0149543	0	23853	T	C	0.0998	0.0185	TRUE	30	+++++++?+++?++++++++?++++???++++++++	48.1	55.9227	0.00193	0.0063268	0.596636	0.0218855	1.21e-163	0.0288373	9.81e-99	913	FALSE	1
	cg26266427-chr6:32415788:SNP	cg26266427	Body	NM_019105	TNXB	Island	chr6	32063838	chr6:32415788:SNP	rs2395183	351950	-0.236565	0.013795	6.443e-66	16563	C	T	0.1995	0.0212	TRUE	24	+++?++++?++?++?++?++?+?+????++?+++++	37.9	37.0478	0.03214	0.0028307	-0.236346	0.0182686	2.774e-38	0.0222207	1.817e-26	913	FALSE	1
	cg26266427-chr6:31290122:SNP	cg26266427	Body	NM_019105	TNXB	Island	chr6	32063838	chr6:31290122:SNP	rs9265216	773716	-0.111286	0.0131312	2.352e-17	12264	T	C	0.3843	0.0343	TRUE	16	?--??--???-??-??----??--?????-???-+-	51.3	30.8237	0.009275	0.0030548	-0.12288	0.0204614	1.908e-09	0.0269834	3.72e-05	913	FALSE	1
	cg26266427-chr6:32604597:INDEL	cg26266427	Body	NM_019105	TNXB	Island	chr6	32063838	chr6:32604597:INDEL	chr6:32604597:INDEL	540759	-0.24171	0.0200815	2.286e-33	6599	D	I	0.2492	0.0265	TRUE	12	?--?-?-?????--?---??????????????-?--	64.6	31.073	0.001073	0.0090831	-0.241098	0.0356884	1.422e-11	0.0567266	2.036e-05	913	FALSE	1
	cg26266427-chr6:32561678:SNP	cg26266427	Body	NM_019105	TNXB	Island	chr6	32063838	chr6:32561678:SNP	rs28366327	497840	0.130591	0.0118697	3.736e-28	16409	A	G	0.3259	0.0419	TRUE	23	+++?+++++++?++?+++++???+????+???++-+	14.4	25.6948	0.265	0.0005536	0.130431	0.0131401	3.203e-23	0.0138631	4.511e-21	913	FALSE	1
	cg26266427-chr6:32437433:SNP	cg26266427	Body	NM_019105	TNXB	Island	chr6	32063838	chr6:32437433:SNP	rs145247936	373595	-0.181027	0.0126792	3.023e-46	16267	A	G	0.2609	0.0347	TRUE	23	---?---??--?--?-----???--???--??----	23.1	28.6031	0.1565	0.0011257	-0.179713	0.0148887	1.514e-33	0.0164847	4.69e-28	913	FALSE	1
	cg26266427-chr6:32598706:SNP	cg26266427	Body	NM_019105	TNXB	Island	chr6	32063838	chr6:32598706:SNP	rs9272028	534868	-0.108924	0.013066	7.657e-17	11956	T	C	0.4773	0.0424	TRUE	18	---?---???-?--?+----????????-???+?--	41.5	29.0361	0.0342	0.0022267	-0.105821	0.0179982	4.114e-09	0.0223168	1.057e-06	913	FALSE	1
	cg26266427-chr6:32560829:SNP	cg26266427	Body	NM_019105	TNXB	Island	chr6	32063838	chr6:32560829:SNP	rs28366297	496991	0.124259	0.012217	2.67e-24	15552	C	G	0.3221	0.0452	TRUE	22	+??++++++++?++?+++++???+????+???++-+	3.3	21.7073	0.4165	0.0001128	0.124189	0.0125067	3.091e-23	0.0126284	7.597e-23	913	FALSE	1
	cg26266427-chr6:31864304:SNP	cg26266427	Body	NM_019105	TNXB	Island	chr6	32063838	chr6:31864304:SNP	rs659445	199534	-0.174107	0.0097082	6.408e-72	23643	G	A	0.3434	0.0427	TRUE	29	+++++++++++?++++++++?+++?????+++++-+	0	19.0343	0.8971	0	-0.174107	0.0097082	6.408e-72	0.0097082	6.408e-72	913	FALSE	1
	cg26266427-chr6:30357294:SNP	cg26266427	Body	NM_019105	TNXB	Island	chr6	32063838	chr6:30357294:SNP	rs3094704		-0.198888	0.0160426	2.697e-35	17575	T	C	0.1279	0.0222	FALSE	25	---?----?--?--?-----?-?+????--?---+-	35.4	37.1389	0.04238	0.0035898	-0.189435	0.0211269	3.061e-19	0.0248252	1.133e-15	913	FALSE	1
	cg26266427-chr6:32302103:INDEL	cg26266427	Body	NM_019105	TNXB	Island	chr6	32063838	chr6:32302103:INDEL	chr6:32302103:INDEL	238265	-0.399431	0.0182944	1.11e-105	13813	D	I	0.1248	0.0215	TRUE	21	---?--????-?--?-----?-?-????--??----	42.8	34.9671	0.02028	0.0053761	-0.404029	0.0256721	8.296e-56	0.0319851	8.677e-36	913	FALSE	1
	cg26266427-chr6:32599338:SNP	cg26266427	Body	NM_019105	TNXB	Island	chr6	32063838	chr6:32599338:SNP	rs9272064	535500	-0.112104	0.0124161	1.734e-19	13209	T	C	0.4877	0.0389	TRUE	20	---?---???-?--?+----???-????-??-+?+-	42.4	32.9968	0.02406	0.0023149	-0.109246	0.0171628	1.949e-10	0.0215628	2.004e-07	913	FALSE	1
	cg26266427-chr6:31288814:SNP	cg26266427	Body	NM_019105	TNXB	Island	chr6	32063838	chr6:31288814:SNP	rs9265153	775024	-0.114679	0.0111967	1.282e-24	17087	C	G	0.3843	0.0424	TRUE	22	---?---???-?--?-----??--????--??--+-	42.1	36.2634	0.02042	0.0020656	-0.119508	0.0157434	3.176e-14	0.0193347	3.006e-09	913	FALSE	1
	cg26266427-chr6:31878495:SNP	cg26266427	Body	NM_019105	TNXB	Island	chr6	32063838	chr6:31878495:SNP	rs622871	185343	-0.222113	0.0101298	1.45e-106	23346	A	G	0.2985	0.0368	TRUE	29	-------?---?--------?---????--------	0	22.6767	0.749	0	-0.222113	0.0101298	1.45e-106	0.0101298	1.45e-106	913	FALSE	1
	cg26266427-chr6:31082960:SNP	cg26266427	Body	NM_019105	TNXB	Island	chr6	32063838	chr6:31082960:SNP	rs1042149	980878	-0.136823	0.0090748	2.286e-51	24636	A	G	0.5084	0.039	TRUE	31	-----------?--------?----???------+-	0	27.2962	0.6077	0	-0.136823	0.0090748	2.286e-51	0.0090748	2.286e-51	913	FALSE	1
	cg26266427-chr6:30171284:SNP	cg26266427	Body	NM_019105	TNXB	Island	chr6	32063838	chr6:30171284:SNP	rs2523715		-0.162885	0.0150471	0	16733	T	C	0.1528	0.0223	FALSE	24	---?----?--?--?-----?+?+????--?-?-+-	30.1	32.8975	0.08287	0.0023826	-0.154239	0.0188715	3.006e-16	0.0215222	3.783e-14	913	FALSE	1
	cg26266427-chr6:32579626:SNP	cg26266427	Body	NM_019105	TNXB	Island	chr6	32063838	chr6:32579626:SNP	rs28752510	515788	0.188022	0.0093763	1.91e-89	22759	A	G	0.4469	0.0194	TRUE	27	+++?++++?++?+++++++++?++????+++?++-+	43	45.6494	0.00998	0.0018239	0.185211	0.0130926	1.971e-45	0.0164625	3.276e-30	913	FALSE	1
	cg26266427-chr6:31319785:SNP	cg26266427	Body	NM_019105	TNXB	Island	chr6	32063838	chr6:31319785:SNP	rs9266076	744053	-0.181768	0.0109522	7.379e-62	18517	A	G	0.3312	0.0258	TRUE	23	---?---??--?--?-----??--????--??----	19.7	27.3943	0.1966	0.0006936	-0.181953	0.0127305	2.431e-46	0.0136376	1.581e-40	913	FALSE	1
	cg26266427-chr6:32451954:SNP	cg26266427	Body	NM_019105	TNXB	Island	chr6	32063838	chr6:32451954:SNP	rs71565335	388116	0.13999	0.0135625	5.61e-25	12685	C	T	0.3248	0.0464	TRUE	19	---?---???-??-?-----???-????-???--+-	16	21.425	0.2585	0.0006805	0.139209	0.0152354	6.409e-20	0.0161431	4.251e-18	913	FALSE	1
	cg26266427-chr6:32584319:SNP	cg26266427	Body	NM_019105	TNXB	Island	chr6	32063838	chr6:32584319:SNP	rs28383241	520481	-0.198091	0.0127528	2.068e-54	12379	C	A	0.449	0.0372	TRUE	19	+++?+++?????++?+++++???+????+???++++	18.2	22.0155	0.2313	0.0007034	-0.197996	0.0145058	2.036e-42	0.0155977	5.909e-37	913	FALSE	1
	cg26266427-chr6:31090398:INDEL	cg26266427	Body	NM_019105	TNXB	Island	chr6	32063838	chr6:31090398:INDEL	chr6:31090398:INDEL	973440	0.137288	0.012389	1.543e-28	14988	D	I	0.3274	0.0224	TRUE	18	?++??++???+??++?++++??++?????++??+-+	7.4	18.3518	0.367	0.0002266	0.137464	0.0131114	1.02e-25	0.0133741	1.011e-24	913	FALSE	1
	cg26266427-chr6:32253559:SNP	cg26266427	Body	NM_019105	TNXB	Island	chr6	32063838	chr6:32253559:SNP	rs9268127	189721	-0.209335	0.013798	0	17166	C	T	0.1897	0.021	TRUE	24	+++?-+++?++?++?+++++?+?+?????+?+++++	14.1	26.7866	0.2652	0.0007642	-0.209147	0.0152381	7.163e-43	0.0160697	8.628e-39	913	FALSE	1
	cg26266427-chr6:31072653:SNP	cg26266427	Body	NM_019105	TNXB	Island	chr6	32063838	chr6:31072653:SNP	rs9263608	991185	-0.136469	0.0103037	4.841e-40	20917	T	G	0.3372	0.0217	TRUE	27	---?-------?--?+----?---????--?-+-+-	41.1	44.1415	0.0146	0.0020424	-0.136376	0.0141951	7.454e-22	0.017493	6.125e-15	913	FALSE	1
	cg26266427-chr6:32433315:SNP	cg26266427	Body	NM_019105	TNXB	Island	chr6	32063838	chr6:32433315:SNP	rs2894259	369477	-0.179081	0.0163835	0	9508	A	G	0.2716	0.0337	TRUE	15	?--??--???-??-??----???-?????-???---	28.8	19.6533	0.1415	0.0016624	-0.180383	0.020128	3.194e-19	0.0229993	6.895e-15	913	FALSE	1
	cg26266427-chr6:31654799:SNP	cg26266427	Body	NM_019105	TNXB	Island	chr6	32063838	chr6:31654799:SNP	rs11552113	409039	0.500321	0.0509547	0	12864	A	G	0.0144	0.0032	TRUE	15	+??+?+?++++?+??++?+???++?????+?????+	25.8	18.8649	0.1702	0.0145785	0.497905	0.0640497	7.621e-15	0.0686611	3.174e-13	913	FALSE	1
	cg26266427-chr6:32579708:SNP	cg26266427	Body	NM_019105	TNXB	Island	chr6	32063838	chr6:32579708:SNP	rs77005575	515870	0.189144	0.0092346	3.1e-93	23509	C	T	0.4486	0.0189	TRUE	28	---?----?--?---------?--????------+-	40.1	45.0834	0.01593	0.0016244	0.186743	0.0125379	3.592e-50	0.0154195	1.369e-34	913	FALSE	1
	cg26266427-chr6:31977493:SNP	cg26266427	Body	NM_019105	TNXB	Island	chr6	32063838	chr6:31977493:SNP	rs4959085	86345	0.179091	0.020543	2.835e-18	9129	T	C	0.1543	0.0137	TRUE	16	+??++???????++?++++??+?+????++??-?++	53.8	32.4799	0.005536	0.0081393	0.186234	0.0322403	7.631e-09	0.0444822	5.67e-05	913	FALSE	1
	cg26266427-chr6:32580585:SNP	cg26266427	Body	NM_019105	TNXB	Island	chr6	32063838	chr6:32580585:SNP	rs9271262	516747	-0.218234	0.0144294	1.119e-51	11547	G	A	0.2913	0.0383	TRUE	15	?++??++???+??+??++++??++?????????+++	28.3	19.5146	0.1462	0.0012958	-0.223582	0.0182024	1.116e-34	0.0201131	1.986e-27	913	FALSE	1
	cg26266427-chr6:32294549:SNP	cg26266427	Body	NM_019105	TNXB	Island	chr6	32063838	chr6:32294549:SNP	rs9268246	230711	-0.209555	0.0134324	7.2e-55	18141	T	A	0.1891	0.0214	TRUE	26	+++?-+++?++?++?+++++?+?++???++?+++++	20.2	31.3145	0.1788	0.0012024	-0.209778	0.0154986	9.672e-42	0.0168252	1.316e-35	913	FALSE	1
	cg26266427-chr6:32759335:SNP	cg26266427	Body	NM_019105	TNXB	Island	chr6	32063838	chr6:32759335:SNP	rs2621383	695497	0.118761	0.010101	6.473e-32	20482	C	A	0.3807	0.0312	TRUE	26	---?+------?--?-+---?---?????-?-----	15.1	29.4592	0.2452	0.0004827	0.118022	0.0113064	1.654e-25	0.0119026	1.909e-23	913	FALSE	1
	cg26266427-chr6:32775480:SNP	cg26266427	Body	NM_019105	TNXB	Island	chr6	32063838	chr6:32775480:SNP	rs2621340	711642	0.117558	0.009705	8.991e-34	24641	C	T	0.3077	0.0357	TRUE	31	--------+--?--------?---+???--------	26.5	40.8038	0.09021	0.0010686	0.116027	0.0118129	9.052e-23	0.0132	5.294e-19	913	FALSE	1
	cg26266427-chr6:32585012:SNP	cg26266427	Body	NM_019105	TNXB	Island	chr6	32063838	chr6:32585012:SNP	rs9469195	521174	0.156762	0.0155636	7.321e-24	10433	G	C	0.292	0.0734	TRUE	17	---?--??????--?-----???-????-???-?--	52.7	33.8093	0.005764	0.0047409	0.150958	0.0242016	4.445e-10	0.0328872	1.873e-06	913	FALSE	1
	cg26266427-chr6:31330611:SNP	cg26266427	Body	NM_019105	TNXB	Island	chr6	32063838	chr6:31330611:SNP	rs2523563	733227	-0.222136	0.0146775	9.596e-52	12987	A	C	0.2299	0.0209	TRUE	17	?--??--???-??-??----??--?????-?-?---	53.4	34.3176	0.004922	0.0043735	-0.234991	0.0232048	4.201e-24	0.0314809	1.711e-12	913	FALSE	1
	cg26266427-chr6:32330477:SNP	cg26266427	Body	NM_019105	TNXB	Island	chr6	32063838	chr6:32330477:SNP	rs3129912	266639	0.13712	0.0124146	2.317e-28	18138	C	A	0.2361	0.0311	TRUE	26	---?----?--?--?-----?-?--???+-?----+	28.7	35.0549	0.08721	0.0016332	0.133767	0.0152249	1.549e-18	0.0174077	3.355e-15	913	FALSE	1
	cg26266427-chr6:31306030:SNP	cg26266427	Body	NM_019105	TNXB	Island	chr6	32063838	chr6:31306030:SNP	rs28752963	757808	-0.146686	0.0102584	0	18806	T	A	0.5028	0.0371	TRUE	23	+++??+++?++?++?+++++??++????++??++++	13.5	25.4291	0.277	0.0003861	-0.147625	0.011349	1.105e-38	0.0118574	3.757e-35	913	FALSE	1
	cg26266427-chr6:32247315:SNP	cg26266427	Body	NM_019105	TNXB	Island	chr6	32063838	chr6:32247315:SNP	rs3132951	183477	-0.204117	0.0124675	3.038e-60	18139	T	C	0.2305	0.0217	TRUE	26	---?----?--?--?+----?-?--???--?-----	15.7	29.6727	0.2368	0.000766	-0.204131	0.0139089	9.141e-49	0.0147978	2.782e-43	913	FALSE	1
	cg26266427-chr6:32386619:SNP	cg26266427	Body	NM_019105	TNXB	Island	chr6	32063838	chr6:32386619:SNP	rs4335021	322781	0.114603	0.0114701	0	15884	T	C	0.383	0.0284	TRUE	24	+++?+++???+?++?+++++?-?++???++?+++++	16.8	27.6528	0.2292	0.000648	0.113849	0.0128765	9.433e-19	0.0137905	9.547e-17	913	FALSE	1
	cg26266427-chr6:31326613:SNP	cg26266427	Body	NM_019105	TNXB	Island	chr6	32063838	chr6:31326613:SNP	rs9266277	737225	-0.13128	0.0132293	0	12264	A	G	0.3616	0.0296	TRUE	16	?--??--???-??-??----??--?????-???--+	17.7	18.2261	0.251	0.0006311	-0.130949	0.015285	1.061e-17	0.0160746	3.164e-16	913	FALSE	1
	cg26266427-chr6:31596138:SNP	cg26266427	Body	NM_019105	TNXB	Island	chr6	32063838	chr6:31596138:SNP	rs3132450	467700	-0.430986	0.0142386	2.95e-201	22791	G	A	0.1237	0.0203	TRUE	28	++++++?++++?++++++++?+++?????+++++++	28	37.5071	0.08598	0.0022573	-0.43487	0.0177407	1.09e-132	0.0197796	2.92e-105	913	FALSE	1
	cg26266427-chr6:32065113:SNP	cg26266427	Body	NM_019105	TNXB	Island	chr6	32063838	chr6:32065113:SNP	rs61746206	1275	0.631683	0.0361216	1.779e-68	20176	T	C	0.0216	0.0066	TRUE	26	+++++++?+++?++?+++++?+++?????+?+++++	0	15.7124	0.9231	0	0.631683	0.0361216	1.779e-68	0.0361216	1.779e-68	913	FALSE	1
	cg26266427-chr6:32601333:SNP	cg26266427	Body	NM_019105	TNXB	Island	chr6	32063838	chr6:32601333:SNP	rs9272176	537495	-0.230362	0.0139452	2.671e-61	13913	T	C	0.2428	0.0306	TRUE	19	---?-?-??--?--?-----????????-???----	43.2	31.6757	0.02401	0.0028597	-0.230948	0.0193994	1.116e-32	0.0245402	6.165e-21	913	FALSE	1
	cg26266427-chr6:31835164:SNP	cg26266427	Body	NM_019105	TNXB	Island	chr6	32063838	chr6:31835164:SNP	rs693906	228674	-0.319951	0.0131349	4.67e-131	22341	C	G	0.1499	0.0155	TRUE	28	------?----?-------??---????--------	39.4	44.5903	0.01795	0.0032154	-0.322578	0.0179617	4.068e-72	0.0216922	3.096e-49	913	FALSE	1
	cg26266427-chr6:31320031:SNP	cg26266427	Body	NM_019105	TNXB	Island	chr6	32063838	chr6:31320031:SNP	rs28380934	743807	0.187718	0.0177586	4.08e-26	12241	G	A	0.1598	0.0187	TRUE	16	?--??--???-??-??----??--?????-???---	0	10.6289	0.7784	0	0.187718	0.0177586	4.08e-26	0.0177586	4.08e-26	913	FALSE	1
	cg26266427-chr6:32768488:SNP	cg26266427	Body	NM_019105	TNXB	Island	chr6	32063838	chr6:32768488:SNP	rs9501664	704650	0.114521	0.0103003	1.023e-28	21912	A	C	0.3085	0.037	TRUE	29	++++++++-++?++?+++++?+++-???++?+++++	26.5	38.1164	0.09622	0.0011329	0.112813	0.0125702	2.842e-19	0.0140219	3.153e-16	913	FALSE	1
	cg26266427-chr6:32788707:SNP	cg26266427	Body	NM_019105	TNXB	Island	chr6	32063838	chr6:32788707:SNP	rs2621323	724869	0.123639	0.0096035	6.273e-38	24632	G	A	0.3215	0.0344	TRUE	31	--------+--?--------?----???--------	3	30.9263	0.419	8.97e-05	0.123653	0.0098176	2.247e-36	0.0099	8.594e-36	913	FALSE	1
	cg26266427-chr6:31347877:SNP	cg26266427	Body	NM_019105	TNXB	Island	chr6	32063838	chr6:31347877:SNP	rs2507980	715961	0.206083	0.0186359	0	19554	A	G	0.0921	0.0304	TRUE	25	+++?++?+?++?++?+++++?++++????+?+++++	15	28.2414	0.25	0.0015622	0.205046	0.0207912	6.074e-23	0.0219293	5.583e-21	913	FALSE	1
	cg26266427-chr6:32756857:SNP	cg26266427	Body	NM_019105	TNXB	Island	chr6	32063838	chr6:32756857:SNP	rs13201537	693019	0.22606	0.0186083	0	21456	C	A	0.0765	0.0138	TRUE	28	---?-------?--?-+---?----???--?---+-	29.2	38.1597	0.07537	0.0040877	0.212245	0.0232052	5.883e-20	0.0262996	8.284e-18	913	FALSE	1
	cg26266427-chr6:30986312:SNP	cg26266427	Body	NM_019105	TNXB	Island	chr6	32063838	chr6:30986312:SNP	rs1345230		-0.180323	0.0143211	2.353e-36	16694	T	C	0.1771	0.025	FALSE	24	---?--?-?--?--?-----?-?-????--?-----	27.6	31.7692	0.105	0.0019122	-0.172169	0.0176089	1.408e-22	0.0197813	7.805e-20	913	FALSE	1
	cg26266427-chr6:32598906:SNP	cg26266427	Body	NM_019105	TNXB	Island	chr6	32063838	chr6:32598906:SNP	rs9272041	535068	0.116008	0.0127996	0	12477	G	A	0.4794	0.0533	TRUE	19	---?---???-?--?+----???-????-???-?--	33.5	27.0857	0.0774	0.0016052	0.112186	0.016427	8.531e-12	0.0192604	1.711e-09	913	FALSE	1
	cg26266427-chr6:31375329:INDEL	cg26266427	Body	NM_019105	TNXB	Island	chr6	32063838	chr6:31375329:INDEL	chr6:31375329:INDEL	688509	0.205944	0.0199805	6.535e-25	17431	D	I	0.0928	0.0333	TRUE	23	+++?+++???+?++?+++++?+++????++??++++	17.8	26.7515	0.2208	0.0020272	0.204294	0.0228348	3.666e-19	0.0242959	2.321e-17	913	FALSE	1
	cg26266427-chr6:32434011:SNP	cg26266427	Body	NM_019105	TNXB	Island	chr6	32063838	chr6:32434011:SNP	rs9268954	370173	0.14069	0.0119606	6.069e-32	15956	A	G	0.3376	0.0486	TRUE	21	+++?+++???+?++?++?++??++????++??++-+	37.6	32.0493	0.04278	0.0018604	0.1347	0.0161005	5.951e-17	0.0191665	2.129e-13	913	FALSE	1
	cg26266427-chr6:32803840:SNP	cg26266427	Body	NM_019105	TNXB	Island	chr6	32063838	chr6:32803840:SNP	rs241429	740002	-0.10164	0.009278	0	23245	A	G	0.4471	0.0389	TRUE	29	-----------?-------??---????--------	0	18.6517	0.9085	0	-0.10164	0.009278	6.29e-28	0.009278	6.29e-28	913	FALSE	1
	cg26266427-chr6:32397049:SNP	cg26266427	Body	NM_019105	TNXB	Island	chr6	32063838	chr6:32397049:SNP	rs3129848	333211	-0.155284	0.0117911	1.314e-39	17169	A	G	0.3099	0.0347	TRUE	24	---?----?--?--?-----?-?-?????-?-----	41.5	39.3423	0.01819	0.0024079	-0.154992	0.0161602	8.73e-22	0.0201692	1.371e-14	913	FALSE	1
	cg26266427-chr6:32583057:SNP	cg26266427	Body	NM_019105	TNXB	Island	chr6	32063838	chr6:32583057:SNP	rs3129755	519219	-0.203636	0.0127204	0	12418	A	G	0.4472	0.0343	TRUE	19	---?---?????--?-----???-????-???----	2.7	18.5088	0.4226	8.87e-05	-0.203496	0.012966	1.646e-55	0.01308	1.191e-54	913	FALSE	1
	cg26266427-chr6:31360918:SNP	cg26266427	Body	NM_019105	TNXB	Island	chr6	32063838	chr6:31360918:SNP	rs3094590	702920	0.210681	0.018045	1.704e-31	20893	T	C	0.0915	0.0301	TRUE	27	+++?++++?++?++?+++++?++++???++?+++++	13.4	30.0103	0.2672	0.0013788	0.209695	0.0198843	5.316e-26	0.0208284	4.734e-24	913	FALSE	1
	cg26266427-chr6:31067837:SNP	cg26266427	Body	NM_019105	TNXB	Island	chr6	32063838	chr6:31067837:SNP	rs3130547	996001	-0.13596	0.0104448	9.802e-39	20156	A	G	0.3423	0.0204	TRUE	26	---?---?---?--?+----?---????--?---+-	40.5	42.006	0.01795	0.0019733	-0.135937	0.0143467	2.663e-21	0.0175498	9.404e-15	913	FALSE	1
	cg26266427-chr6:32596444:SNP	cg26266427	Body	NM_019105	TNXB	Island	chr6	32063838	chr6:32596444:SNP	rs9271922	532606	-0.122616	0.0141991	0	10184	A	G	0.4798	0.0396	TRUE	16	---?-?-?????--?+----????????-???+?+-	40.4	25.1843	0.04752	0.0022562	-0.116949	0.0194906	1.97e-09	0.0238396	2.698e-07	913	FALSE	1
	cg26266427-chr6:31910929:SNP	cg26266427	Body	NM_019105	TNXB	Island	chr6	32063838	chr6:31910929:SNP	rs2242572	152909	0.348044	0.0156494	1.41e-109	24634	A	G	0.095	0.0171	TRUE	31	+++++++++++?++++-+++?++++???++++++++	29.3	42.4068	0.06603	0.0031859	0.344862	0.0194164	1.406e-70	0.0221213	8.927e-56	913	FALSE	1
	cg26266427-chr6:31317065:SNP	cg26266427	Body	NM_019105	TNXB	Island	chr6	32063838	chr6:31317065:SNP	rs2923007	746773	-0.330005	0.014255	0	20622	C	T	0.1392	0.0205	TRUE	26	+++?+++++++?++?+++++??++????++?+++++	21	31.6639	0.168	0.001443	-0.332019	0.0168005	6.269e-87	0.0180548	1.238e-74	913	FALSE	1
	cg26266427-chr6:31324931:SNP	cg26266427	Body	NM_019105	TNXB	Island	chr6	32063838	chr6:31324931:SNP	rs9266206	738907	-0.148085	0.0106798	1.019e-43	19077	A	C	0.345	0.0373	TRUE	24	---?+--?+--?--?-----??--????--??----	43.7	40.8769	0.01223	0.0021803	-0.1442	0.0151556	1.824e-21	0.0189807	6.099e-15	913	FALSE	1
	cg26266427-chr6:32928984:SNP	cg26266427	Body	NM_019105	TNXB	Island	chr6	32063838	chr6:32928984:SNP	rs9276931	865146	-0.234371	0.0148152	0	23659	G	A	0.1089	0.0143	TRUE	29	+++++++++++?++++++++?+++?????+++++++	1.2	28.353	0.4459	8.16e-05	-0.234554	0.014953	1.885e-55	0.015002	5.104e-55	913	FALSE	1
	cg26266427-chr6:31034595:SNP	cg26266427	Body	NM_019105	TNXB	Island	chr6	32063838	chr6:31034595:SNP	rs3094089		-0.127659	0.0110092	4.336e-31	19346	C	T	0.2732	0.0225	FALSE	25	+++?-++?+++?+-?--+++?+++????++??++++	36.7	37.9117	0.0354	0.0017977	-0.121573	0.0146598	1.104e-16	0.0173908	2.126e-13	913	FALSE	1
	cg26266427-chr6:32594061:SNP	cg26266427	Body	NM_019105	TNXB	Island	chr6	32063838	chr6:32594061:SNP	rs9271763	530223	0.145288	0.01343	2.822e-27	10936	G	A	0.4832	0.0363	TRUE	16	---?-?-???-?--?---?-????????-???-?--	40.2	25.1008	0.04861	0.0019993	0.144262	0.01841	4.648e-15	0.0224736	1.014e-10	913	FALSE	1
	cg26266427-chr6:32565905:SNP	cg26266427	Body	NM_019105	TNXB	Island	chr6	32063838	chr6:32565905:SNP	rs9270652	502067	-0.211591	0.0145231	0	10574	T	C	0.3317	0.0285	TRUE	15	---?-?-??-??--?---?????????????--?--	47.7	26.7817	0.02055	0.0029764	-0.209262	0.0213869	1.311e-22	0.0277824	2.616e-14	913	FALSE	1
	cg26266427-chr6:31662463:SNP	cg26266427	Body	NM_019105	TNXB	Island	chr6	32063838	chr6:31662463:SNP	rs805278	401375	0.361523	0.023016	1.344e-55	19146	T	C	0.0605	0.0279	TRUE	25	+++++++?++??++?+++++?++++????+?++++?	17.2	28.996	0.2203	0.0027904	0.35798	0.0258556	1.357e-43	0.0278071	1.206e-38	913	FALSE	1
	cg26266427-chr6:32559975:SNP	cg26266427	Body	NM_019105	TNXB	Island	chr6	32063838	chr6:32559975:SNP	rs28366272	496137	0.185848	0.0221777	5.295e-17	8461	A	C	0.1451	0.0322	TRUE	12	+???+?????+?++?+?+??????????+??++?-+	37.3	17.5559	0.09247	0.0037009	0.177504	0.0299834	3.218e-09	0.0353954	1.516e-07	913	FALSE	1
	cg26266427-chr6:32754091:SNP	cg26266427	Body	NM_019105	TNXB	Island	chr6	32063838	chr6:32754091:SNP	rs4546530	690253	-0.173911	0.0129339	3.243e-41	13307	T	C	0.3203	0.0206	TRUE	18	?--??--???-??-?-----??--?????-?-?---	3.5	17.6213	0.4131	0.000114	-0.174513	0.013307	2.724e-39	0.0134065	1.762e-38	913	FALSE	1
	cg26266427-chr6:32752199:SNP	cg26266427	Body	NM_019105	TNXB	Island	chr6	32063838	chr6:32752199:SNP	rs28986374	688361	0.230432	0.0189863	6.745e-34	20723	G	A	0.0767	0.0147	TRUE	27	---?-------?--?-+---?----???--??--+-	30.4	37.3576	0.06938	0.0043427	0.215787	0.0239291	1.919e-19	0.0272801	2.992e-17	913	FALSE	1
	cg26266427-chr6:30650026:SNP	cg26266427	Body	NM_019105	TNXB	Island	chr6	32063838	chr6:30650026:SNP	rs9262142		-0.197709	0.0158956	1.626e-35	17092	A	G	0.1362	0.023	FALSE	24	---?----?--?--?-----?-?+?????-?---+-	29	32.3765	0.09256	0.0025207	-0.189944	0.0198326	9.958e-22	0.0223759	9.935e-19	913	FALSE	1
	cg26266427-chr6:32254452:SNP	cg26266427	Body	NM_019105	TNXB	Island	chr6	32063838	chr6:32254452:SNP	rs9268131	190614	-0.205989	0.0126382	1.006e-59	17656	G	A	0.2303	0.022	TRUE	25	+++?++++?++?++?-++++?+?++????+?+++++	16.1	28.5999	0.2356	0.0007766	-0.206143	0.0141373	3.683e-48	0.0150605	1.386e-42	913	FALSE	1
	cg26266427-chr6:31697808:INDEL	cg26266427	Body	NM_019105	TNXB	Island	chr6	32063838	chr6:31697808:INDEL	chr6:31697808:INDEL	366030	0.397036	0.0498048	0	11700	I	D	0.0233	0.0136	TRUE	16	------??-???--?-?-?-?-???????-??--??	0	13.1584	0.5901	0	0.397036	0.0498048	1.563e-15	0.0498048	1.563e-15	913	FALSE	1
	cg26266427-chr6:32570352:SNP	cg26266427	Body	NM_019105	TNXB	Island	chr6	32063838	chr6:32570352:SNP	rs2516050	506514	-0.143325	0.0133204	5.328e-27	11656	A	G	0.4089	0.0397	TRUE	17	---?-?-???-?--?---?-????????-??--?--	42.3	27.7072	0.03426	0.0022568	-0.141292	0.0184286	1.76e-14	0.023067	5.183e-10	913	FALSE	1
	cg26266427-chr6:32608537:SNP	cg26266427	Body	NM_019105	TNXB	Island	chr6	32063838	chr6:32608537:SNP	rs28383418	544699	0.119279	0.0191585	4.788e-10	6544	C	A	0.3103	0.0359	TRUE	10	-???-???????-+?-?-??????????-???-?+-	0	8.74961	0.4607	0	0.119279	0.0191585	4.788e-10	0.0191585	4.788e-10	913	FALSE	1
	cg26266427-chr6:30920124:SNP	cg26266427	Body	NM_019105	TNXB	Island	chr6	32063838	chr6:30920124:SNP	rs3132580		-0.187385	0.015041	1.261e-35	17089	A	G	0.1537	0.0256	FALSE	24	---?+---?--?--?-----?-?+?????-?+--+-	40.2	38.4544	0.02275	0.0037174	-0.173459	0.0206086	3.869e-17	0.0251475	9.233e-14	913	FALSE	1
	cg26266427-chr6:32345595:SNP	cg26266427	Body	NM_019105	TNXB	Island	chr6	32063838	chr6:32345595:SNP	rs2395153	281757	0.113664	0.0110299	6.687e-25	17142	G	C	0.418	0.045	TRUE	24	---??-+-?--?--?-----?-?-????--?-----	50.6	46.5253	0.002572	0.0030319	0.114181	0.0164847	4.314e-12	0.0223117	3.5e-07	913	FALSE	1
	cg26266427-chr6:32134656:SNP	cg26266427	Body	NM_019105	TNXB	Island	chr6	32063838	chr6:32134656:SNP	rs3130347	70818	-0.132592	0.0118743	5.961e-29	20975	C	T	0.2173	0.0304	TRUE	27	+++?+++++++?++?-++++?++++????+?+++++	5	27.3592	0.3907	0.0002034	-0.132416	0.0123454	7.686e-27	0.012495	2.633e-26	913	FALSE	1
	cg26266427-chr6:31847180:SNP	cg26266427	Body	NM_019105	TNXB	Island	chr6	32063838	chr6:31847180:SNP	rs146903072	216658	0.594542	0.0356618	0	21007	A	G	0.022	0.0076	TRUE	27	+++++++?+++?+++++++??++++????+?+++++	0	16.55	0.922	0	0.594542	0.0356618	2.106e-62	0.0356618	2.106e-62	913	FALSE	1
	cg26266427-chr6:32747029:SNP	cg26266427	Body	NM_019105	TNXB	Island	chr6	32063838	chr6:32747029:SNP	rs13212165	683191	0.223289	0.0189022	0	20970	A	G	0.076	0.0136	TRUE	27	+++?+++++++?++?+-+++?++++????+?+++-+	31.3	37.82	0.06293	0.0044756	0.209251	0.0239377	2.301e-18	0.0274954	4.625e-16	913	FALSE	1
	cg26266427-chr6:31891662:SNP	cg26266427	Body	NM_019105	TNXB	Island	chr6	32063838	chr6:31891662:SNP	rs1265908	172176	0.280326	0.0183453	1.032e-52	24632	C	T	0.0712	0.0181	TRUE	31	-----------?----+---?----???--------	24.2	39.5846	0.1132	0.0033862	0.27859	0.0219623	7.171e-37	0.0242064	5.166e-31	913	FALSE	1
	cg26266427-chr6:32420864:SNP	cg26266427	Body	NM_019105	TNXB	Island	chr6	32063838	chr6:32420864:SNP	rs9268787	357026	-0.146159	0.0122611	9.245e-33	13664	A	G	0.4395	0.0375	TRUE	21	---?+--???-?--?--?--???--???--??----	20.2	25.0691	0.1988	0.0008141	-0.145736	0.0141222	5.744e-25	0.0153687	1.903e-21	913	FALSE	1
	cg26266427-chr6:30851989:SNP	cg26266427	Body	NM_019105	TNXB	Island	chr6	32063838	chr6:30851989:SNP	rs1264325		-0.215187	0.0154703	5.528e-44	17575	A	G	0.1417	0.0248	FALSE	25	---?----?--?--?-----?-?+????--?-----	26.9	32.8245	0.1078	0.0022431	-0.207138	0.0189939	1.085e-27	0.0211585	2.692e-24	913	FALSE	1
	cg26266427-chr6:31097820:SNP	cg26266427	Body	NM_019105	TNXB	Island	chr6	32063838	chr6:31097820:SNP	rs6906566	966018	0.194749	0.0127824	0	24147	T	C	0.1552	0.0276	TRUE	30	+++++++++++?++++++++?+++????++++++-+	25.1	38.6973	0.1076	0.0016651	0.194414	0.0153667	1.096e-36	0.0170567	3.408e-30	913	FALSE	1
	cg26266427-chr6:31686497:SNP	cg26266427	Body	NM_019105	TNXB	Island	chr6	32063838	chr6:31686497:SNP	rs15574	377341	0.12815	0.0117307	0	21424	A	G	0.2264	0.0495	TRUE	28	++-+-+++++-?++?+++++?++++????+?+++++	40.4	45.2656	0.01524	0.0026605	0.130719	0.0160529	3.856e-16	0.0196665	7.214e-11	913	FALSE	1
	cg26266427-chr6:32750865:SNP	cg26266427	Body	NM_019105	TNXB	Island	chr6	32063838	chr6:32750865:SNP	rs28893558	687027	0.226122	0.0186377	7.103e-34	21454	G	A	0.0766	0.0142	TRUE	28	---?-------?--?-+---?----???--?---+-	29.9	38.4994	0.0703	0.0042262	0.211823	0.0233652	1.238e-19	0.0265755	1.76e-17	913	FALSE	1
	cg26266427-chr6:32565979:SNP	cg26266427	Body	NM_019105	TNXB	Island	chr6	32063838	chr6:32565979:SNP	rs28383172	502141	0.246022	0.0159336	0	17294	G	A	0.1354	0.021	TRUE	22	---?---?--??--?---??-?-?-???-??-----	29.6	29.8236	0.09559	0.0024073	0.242486	0.020059	1.213e-33	0.0226285	1.563e-27	913	FALSE	1
	cg26266427-chr6:31479126:SNP	cg26266427	Body	NM_019105	TNXB	Island	chr6	32063838	chr6:31479126:SNP	rs2246626	584712	0.130577	0.0091845	7.166e-46	24604	T	C	0.4157	0.0317	TRUE	31	+++-+++++++?++++++++?++++???++++++++	34.1	45.5091	0.03459	0.001372	0.130781	0.0118469	2.469e-28	0.0139325	7.11e-21	913	FALSE	1
	cg26266427-chr6:31336604:SNP	cg26266427	Body	NM_019105	TNXB	Island	chr6	32063838	chr6:31336604:SNP	rs2844569	727234	-0.182564	0.0103767	2.755e-69	20968	T	C	0.3258	0.0385	TRUE	27	---?-------?--?-----?---????--?-----	20.5	32.7202	0.1704	0.0007676	-0.185216	0.0121391	1.462e-52	0.0130588	2.059e-44	913	FALSE	1
	cg26266427-chr6:31318432:SNP	cg26266427	Body	NM_019105	TNXB	Island	chr6	32063838	chr6:31318432:SNP	rs2596508	745406	-0.330376	0.0142598	9.5e-119	20609	C	T	0.1392	0.0204	TRUE	26	+++?+++++++?++?+++++??++????++?+++++	20.8	31.5822	0.1705	0.001426	-0.332342	0.0167745	2.331e-87	0.0180143	3.99e-75	913	FALSE	1
	cg26266427-chr6:32666738:SNP	cg26266427	Body	NM_019105	TNXB	Island	chr6	32063838	chr6:32666738:SNP	rs2856725	602900	-0.124304	0.0107629	0	17657	C	T	0.4024	0.0276	TRUE	25	+++?++++?+-?+-?+++++?+?++????+?+++++	48.3	46.4268	0.003932	0.0027416	-0.125788	0.0156337	8.556e-16	0.0208204	2.368e-09	913	FALSE	1
	cg26266427-chr6:31306570:SNP	cg26266427	Body	NM_019105	TNXB	Island	chr6	32063838	chr6:31306570:SNP	rs28752987	757268	0.139556	0.0134342	2.809e-25	10958	C	T	0.4832	0.0369	TRUE	14	?--??-????-??-??--?-??--?????-???---	6.1	13.8508	0.3844	0.0001747	0.139679	0.0141664	6.211e-23	0.0143134	1.844e-22	913	FALSE	1
	cg26266427-chr6:31897543:SNP	cg26266427	Body	NM_019105	TNXB	Island	chr6	32063838	chr6:31897543:SNP	rs588990	166295	0.282094	0.0183405	2.198e-53	24632	A	G	0.0714	0.0183	TRUE	31	+++++++++++?++++-+++?++++???++++++++	25.7	40.3985	0.09737	0.0036724	0.280675	0.022225	1.464e-36	0.0246977	3.251e-30	913	FALSE	1
	cg26266427-chr6:32603414:INDEL	cg26266427	Body	NM_019105	TNXB	Island	chr6	32063838	chr6:32603414:INDEL	chr6:32603414:INDEL	539576	-0.256246	0.0160038	1.061e-57	10437	D	I	0.2374	0.0252	TRUE	13	?--???-???-??-??----??-??????????---	25.8	16.1808	0.1831	0.0012389	-0.258732	0.0199329	1.585e-38	0.0215796	1.607e-32	913	FALSE	1
	cg26266427-chr6:31307356:INDEL	cg26266427	Body	NM_019105	TNXB	Island	chr6	32063838	chr6:31307356:INDEL	chr6:31307356:INDEL	756482	-0.144205	0.0109451	1.218e-39	16566	I	D	0.5022	0.0403	TRUE	21	+++??++???+?++?+++++??++????++??++++	13.8	23.2135	0.2784	0.0004157	-0.145092	0.0121735	9.464e-33	0.0127037	7.3e-30	913	FALSE	1
	cg26266427-chr6:32227839:SNP	cg26266427	Body	NM_019105	TNXB	Island	chr6	32063838	chr6:32227839:SNP	rs139600543	164001	-0.193179	0.0123172	0	18076	T	A	0.2405	0.0241	TRUE	26	+++?++++?++?++?-++++?+?++???++?+++++	24.4	33.0879	0.1289	0.0012938	-0.192787	0.0146423	1.37e-39	0.016302	2.151e-32	913	FALSE	1
	cg26266427-chr6:32590483:SNP	cg26266427	Body	NM_019105	TNXB	Island	chr6	32063838	chr6:32590483:SNP	rs9271571	526645	0.149929	0.0148078	4.281e-24	10945	T	C	0.3107	0.0447	TRUE	14	?++???+???+??+??++++??++?????????+-+	39.7	21.5599	0.06257	0.0021199	0.147915	0.020602	6.989e-13	0.0245581	1.028e-09	913	FALSE	1
	cg26266427-chr6:31332526:SNP	cg26266427	Body	NM_019105	TNXB	Island	chr6	32063838	chr6:31332526:SNP	rs2844582	731312	0.0995125	0.0125548	2.259e-15	21455	T	C	0.1877	0.0334	TRUE	28	+++?+-+++++?+-?+-+++?++++???++?++++-	16.1	32.1915	0.2251	0.0008635	0.0981518	0.014135	3.814e-12	0.0149689	2.972e-11	913	FALSE	1
	cg26266427-chr6:32580225:INDEL	cg26266427	Body	NM_019105	TNXB	Island	chr6	32063838	chr6:32580225:INDEL	chr6:32580225:INDEL	516387	0.194795	0.0116028	2.957e-63	14988	D	I	0.4475	0.0219	TRUE	18	?++??++???+??++?++++??++?????++??+-+	43.8	30.2249	0.02477	0.0019426	0.194676	0.0164947	3.797e-32	0.0206291	3.631e-21	913	FALSE	1
	cg26266427-chr6:32567946:SNP	cg26266427	Body	NM_019105	TNXB	Island	chr6	32063838	chr6:32567946:SNP	rs76079471	504108	-0.255072	0.0192481	4.405e-40	6796	T	C	0.2595	0.0195	TRUE	9	?--???-??????-??--????-???????????--	32.7	11.88	0.1566	0.0018747	-0.261001	0.0265761	9.155e-23	0.0285835	4.508e-19	913	FALSE	1
	cg26266427-chr6:32608152:SNP	cg26266427	Body	NM_019105	TNXB	Island	chr6	32063838	chr6:32608152:SNP	rs9272631	544314	-0.225755	0.0195547	7.843e-31	6550	C	T	0.2722	0.0317	TRUE	10	+???+???????++?+?+??????????+???+?++	52.3	18.8745	0.02628	0.0044305	-0.225012	0.0304529	1.481e-13	0.0410095	3.693e-08	913	FALSE	1
	cg26266427-chr6:32445992:SNP	cg26266427	Body	NM_019105	TNXB	Island	chr6	32063838	chr6:32445992:SNP	rs17209866	382154	0.136586	0.0118365	0	14368	A	G	0.4512	0.0341	TRUE	21	+++?++++??+?++?+++++???+????+???++++	22.7	25.8578	0.1706	0.0008771	0.137233	0.0139009	5.491e-23	0.0153034	4.447e-19	913	FALSE	1
	cg26266427-chr6:32206539:SNP	cg26266427	Body	NM_019105	TNXB	Island	chr6	32063838	chr6:32206539:SNP	rs3134937	142701	-0.207945	0.0133539	1.131e-54	14544	T	C	0.254	0.0239	TRUE	22	---?---???-?--?+----?-?-????--?-?---	47.4	39.9059	0.007635	0.0035825	-0.201914	0.0191911	6.897e-26	0.0253761	2.516e-16	913	FALSE	1
	cg26266427-chr6:32677190:SNP	cg26266427	Body	NM_019105	TNXB	Island	chr6	32063838	chr6:32677190:SNP	rs9275556	613352	-0.138885	0.0106732	1.038e-38	17654	C	T	0.428	0.0276	TRUE	25	+++?++++?++?+-?+++++?+?++????+?+++++	42.3	41.6182	0.01423	0.0021181	-0.140038	0.0146494	1.186e-21	0.0185083	6.191e-14	913	FALSE	1
	cg26266427-chr6:32603295:SNP	cg26266427	Body	NM_019105	TNXB	Island	chr6	32063838	chr6:32603295:SNP	rs9272263	539457	-0.242573	0.0124789	3.638e-84	17203	A	G	0.2392	0.0222	TRUE	21	---?--?-?--?--?-----??-?????-???----	47.3	37.9747	0.008919	0.0030276	-0.241681	0.0184009	2.098e-39	0.0236941	1.344e-24	913	FALSE	1
	cg26266427-chr6:32777718:INDEL	cg26266427	Body	NM_019105	TNXB	Island	chr6	32063838	chr6:32777718:INDEL	chr6:32777718:INDEL	713880	-0.168114	0.0103421	2.048e-59	20296	D	I	0.3432	0.0314	TRUE	26	------??-?-?--------?---????---?----	39.8	41.5482	0.02009	0.0018808	-0.169079	0.0141352	5.646e-33	0.0171878	1.359e-22	913	FALSE	1
	cg26266427-chr6:31238613:SNP	cg26266427	Body	NM_019105	TNXB	Island	chr6	32063838	chr6:31238613:SNP	rs9264647	825225	-0.179212	0.0105575	1.263e-64	19740	A	G	0.338	0.0299	TRUE	25	---?----+--?--?-----??--????--?-?---	12	27.268	0.2921	0.0003885	-0.179399	0.0115768	3.667e-54	0.0119951	1.8e-50	913	FALSE	1
	cg26266427-chr6:32681669:SNP	cg26266427	Body	NM_019105	TNXB	Island	chr6	32063838	chr6:32681669:SNP	rs6935723	617831	0.160913	0.0123931	1.505e-38	17142	C	T	0.2549	0.0446	TRUE	24	---?----?--?-+?-----?-?-?????-?-----	40.6	38.6934	0.02143	0.0025482	0.157056	0.0166924	5.015e-21	0.0208491	1.182e-14	913	FALSE	1
	cg26266427-chr6:32317467:SNP	cg26266427	Body	NM_019105	TNXB	Island	chr6	32063838	chr6:32317467:SNP	rs2076539	253629	-0.193851	0.0108954	8.158e-71	17655	C	T	0.3869	0.04	TRUE	25	+++?++++?++?++?+++++?+?+????++?+++++	37.9	38.6762	0.02952	0.0018416	-0.193331	0.0144382	6.896e-41	0.017558	2.435e-28	913	FALSE	1
	cg26266427-chr6:32964269:SNP	cg26266427	Body	NM_019105	TNXB	Island	chr6	32063838	chr6:32964269:SNP	rs206766	900431	0.111865	0.013742	3.94e-16	15865	T	C	0.2152	0.0233	TRUE	21	+++?+++???+??+?++++??+++?????+?+-+++	15.3	23.6051	0.2601	0.0007357	0.109275	0.0154638	1.589e-12	0.016219	5.306e-12	913	FALSE	1
	cg26266427-chr6:32651846:SNP	cg26266427	Body	NM_019105	TNXB	Island	chr6	32063838	chr6:32651846:SNP	rs3021060	588008	0.126203	0.0124686	4.43e-24	17797	C	G	0.2374	0.0156	TRUE	25	+++?++++?+-?++?+++++???++???++?+++-+	35.3	37.1218	0.04255	0.002154	0.123477	0.0161228	1.881e-14	0.0192858	5.996e-11	913	FALSE	1
	cg26266427-chr6:32596177:SNP	cg26266427	Body	NM_019105	TNXB	Island	chr6	32063838	chr6:32596177:SNP	rs9271909	532339	-0.109195	0.012587	4.127e-18	12828	T	A	0.484	0.037	TRUE	18	+++?+?+??++?++?-++++????????+???-?-+	35.5	26.3575	0.06819	0.0016089	-0.108209	0.0165206	5.757e-11	0.0195153	2.202e-08	913	FALSE	1
	cg26266427-chr6:31705183:SNP	cg26266427	Body	NM_019105	TNXB	Island	chr6	32063838	chr6:31705183:SNP	rs377749	358655	0.370496	0.0411552	0	15667	C	A	0.0253	0.015	TRUE	21	------?---??--?-?-?-?-?+-????-?---??	28	27.7734	0.1149	0.0139326	0.369778	0.0492831	6.23e-14	0.0571509	9.006e-11	913	FALSE	1
	cg26266427-chr6:31415876:INDEL	cg26266427	Body	NM_019105	TNXB	Island	chr6	32063838	chr6:31415876:INDEL	chr6:31415876:INDEL	647962	-0.15066	0.0142282	3.356e-26	12265	D	I	0.2717	0.0365	TRUE	16	?--??--???-??-??----??--?????-???---	47.1	28.3536	0.01946	0.0030059	-0.159928	0.0210797	3.278e-14	0.0268946	2.12e-08	913	FALSE	1
	cg26266427-chr6:32058425:SNP	cg26266427	Body	NM_019105	TNXB	Island	chr6	32063838	chr6:32058425:SNP	rs17201595	5413	0.473385	0.0339881	4.284e-44	19721	C	G	0.0246	0.007	TRUE	26	+++-?+++++??++?+++++?+++????++?++++-	0	22.6476	0.5981	0	0.473385	0.0339881	4.284e-44	0.0339881	4.284e-44	913	FALSE	1
	cg26266427-chr6:32395465:SNP	cg26266427	Body	NM_019105	TNXB	Island	chr6	32063838	chr6:32395465:SNP	rs1894552	331627	-0.234852	0.0135883	0	17653	G	T	0.191	0.0217	TRUE	25	+++?++++?++?++?+++++?+?+????++?+++++	46.1	44.4975	0.006675	0.0039974	-0.237288	0.0193908	1.969e-34	0.0251936	1.143e-20	913	FALSE	1
	cg26266427-chr6:32749011:SNP	cg26266427	Body	NM_019105	TNXB	Island	chr6	32063838	chr6:32749011:SNP	rs28986346	685173	0.260684	0.0245478	2.42e-26	12264	G	A	0.0797	0.0137	TRUE	16	?--??--???-??-??+---??--?????-???-+-	32.4	22.1865	0.103	0.0048492	0.245107	0.0321128	2.299e-14	0.0363086	6.988e-13	913	FALSE	1
	cg26266427-chr6:30227425:SNP	cg26266427	Body	NM_019105	TNXB	Island	chr6	32063838	chr6:30227425:SNP	rs3129697		-0.148866	0.0141798	8.782e-26	17575	G	C	0.1661	0.0211	FALSE	25	+++?++++?++?++?+++++?-?-????++?+++-+	29	33.8121	0.08806	0.0020886	-0.141619	0.0175481	7.012e-16	0.019977	9.204e-14	913	FALSE	1
	cg26266427-chr6:32073700:SNP	cg26266427	Body	NM_019105	TNXB	Island	chr6	32063838	chr6:32073700:SNP	rs55740958	9862	0.620716	0.0166803	0	24134	T	C	0.0794	0.0155	TRUE	30	+++++++++++?++++++++?+++????++++++++	50.3	58.3585	0.000984	0.0085895	0.612986	0.0249431	2.32e-133	0.0335667	2.395e-76	913	FALSE	1
	cg26266427-chr6:31980773:SNP	cg26266427	Body	NM_019105	TNXB	Island	chr6	32063838	chr6:31980773:SNP	rs71253783	83065	0.46217	0.023418	0	7466	G	A	0.1454	0.0141	TRUE	11	?--??-???????-??---???--??????????--	8.5	10.9253	0.3634	0.0006211	0.456204	0.0255516	2.68e-71	0.0255849	6.101e-73	913	FALSE	1
	cg26266427-chr6:32749836:SNP	cg26266427	Body	NM_019105	TNXB	Island	chr6	32063838	chr6:32749836:SNP	rs115104729	685998	0.247998	0.0203388	3.372e-34	19104	T	A	0.0739	0.0163	TRUE	24	---?---?---?--?-+---??--????--??--+-	31.8	33.7392	0.06902	0.0047571	0.232299	0.0260318	4.51e-19	0.0298354	9.394e-17	913	FALSE	1
	cg26266427-chr6:32587645:SNP	cg26266427	Body	NM_019105	TNXB	Island	chr6	32063838	chr6:32587645:SNP	rs9271410	523807	-0.231346	0.0120414	2.907e-82	16900	G	A	0.282	0.0271	TRUE	21	+++?++++?+??++?+++++??+?????+???++++	54.9	44.3832	0.001337	0.0038241	-0.229968	0.0192319	5.922e-33	0.0267218	4.819e-18	913	FALSE	1
	cg26266427-chr6:32443034:SNP	cg26266427	Body	NM_019105	TNXB	Island	chr6	32063838	chr6:32443034:SNP	rs9269105	379196	-0.217538	0.0142054	6.191e-53	14333	C	G	0.2282	0.0346	TRUE	21	---?---???-?--?-----???-????-??-----	9.1	21.9957	0.3407	0.0004303	-0.217187	0.0151213	8.84e-47	0.0156229	4.509e-44	913	FALSE	1
	cg26266427-chr6:32597064:SNP	cg26266427	Body	NM_019105	TNXB	Island	chr6	32063838	chr6:32597064:SNP	rs74927567	533226	-0.204954	0.0124611	8.743e-61	13104	G	A	0.4145	0.0311	TRUE	18	+++?+?+??++?++?+++?+????????+??++?++	8.9	18.6519	0.3489	0.0002777	-0.204796	0.0132658	9.099e-54	0.013672	8.436e-51	913	FALSE	1
	cg26266427-chr6:32439393:SNP	cg26266427	Body	NM_019105	TNXB	Island	chr6	32063838	chr6:32439393:SNP	rs9405040	375555	0.156805	0.0116985	5.738e-41	16906	C	A	0.3281	0.0465	TRUE	22	---?---???-??-?-----??--????--?---+-	24.2	27.6929	0.1491	0.0009838	0.154956	0.014073	3.386e-28	0.015427	2.859e-24	913	FALSE	1
	cg26266427-chr6:32204207:SNP	cg26266427	Body	NM_019105	TNXB	Island	chr6	32063838	chr6:32204207:SNP	rs9267904	140369	-0.143107	0.0105382	5.273e-42	18109	G	T	0.4513	0.0409	TRUE	26	+++?++++?++?++?+++++?+?++???++?+++++	0	22.0386	0.6335	0	-0.143107	0.0105382	5.273e-42	0.0105382	5.273e-42	913	FALSE	1
	cg26266427-chr6:32413459:SNP	cg26266427	Body	NM_019105	TNXB	Island	chr6	32063838	chr6:32413459:SNP	rs2227139	349621	-0.148785	0.0109234	3.012e-42	17654	G	A	0.4015	0.0394	TRUE	25	+++?++++?++?++?+++++?+?++????+?+++++	34.9	36.8689	0.0451	0.0016216	-0.150597	0.0140869	1.127e-26	0.0167806	7.547e-19	913	FALSE	1
	cg26266427-chr6:31306342:SNP	cg26266427	Body	NM_019105	TNXB	Island	chr6	32063838	chr6:31306342:SNP	rs28752977	757496	-0.14333	0.0101258	0	19319	C	G	0.5052	0.0414	TRUE	24	---?+---?--?--?-----??--????--??----	23.8	30.1941	0.1439	0.0007869	-0.144042	0.0121075	1.227e-32	0.0132931	4.17e-27	913	FALSE	1
	cg26266427-chr6:32680199:SNP	cg26266427	Body	NM_019105	TNXB	Island	chr6	32063838	chr6:32680199:SNP	rs9501184	616361	0.156061	0.0122867	5.787e-37	17416	A	G	0.2563	0.0446	TRUE	25	+++?++++?++?+-?+++++?+?++???++??++++	39.5	39.6963	0.02305	0.0025007	0.152221	0.0164142	1.797e-20	0.0203223	1.599e-14	913	FALSE	1
	cg26266427-chr6:32226481:SNP	cg26266427	Body	NM_019105	TNXB	Island	chr6	32063838	chr6:32226481:SNP	rs9268026	162643	-0.401591	0.0160717	0	17636	G	A	0.1258	0.0199	TRUE	25	+++?++++?++?++?+++++?+?+????++?+++++	41.4	40.956	0.01684	0.0046342	-0.405707	0.022103	2.991e-75	0.0274264	1.505e-48	913	FALSE	1
	cg26266427-chr6:31947027:SNP	cg26266427	Body	NM_019105	TNXB	Island	chr6	32063838	chr6:31947027:SNP	rs181705462	116811	0.693287	0.0688903	7.998e-24	7172	T	G	0.0166	0.0063	TRUE	12	???+++??+??????+++++?+???????+???+??	35.9	17.1609	0.1032	0.0323049	0.693797	0.0878161	2.776e-15	0.107475	1.113e-10	913	FALSE	1
	cg26266427-chr6:32189841:SNP	cg26266427	Body	NM_019105	TNXB	Island	chr6	32063838	chr6:32189841:SNP	rs715299	126003	-0.131761	0.0115003	0	17169	G	T	0.3212	0.032	TRUE	24	+++?++++?++?++?-++++?-?+?????+?+++++	49.3	45.3964	0.003553	0.0031363	-0.130824	0.0169408	1.142e-14	0.0226987	6.445e-09	913	FALSE	1
	cg26266427-chr6:32750656:SNP	cg26266427	Body	NM_019105	TNXB	Island	chr6	32063838	chr6:32750656:SNP	rs28986352	686818	0.226074	0.018602	5.519e-34	21455	G	A	0.0769	0.0143	TRUE	28	---?-------?--?-+---?----???--?---+-	29.5	38.2807	0.07353	0.0041293	0.212005	0.023239	7.321e-20	0.026374	1.019e-17	913	FALSE	1
	cg26266427-chr6:32608885:SNP	cg26266427	Body	NM_019105	TNXB	Island	chr6	32063838	chr6:32608885:SNP	rs9272674	545047	-0.219401	0.016956	2.696e-38	8738	T	C	0.272	0.0322	TRUE	12	-???-??-?-??--?-?-??????????-???-?--	34	16.6737	0.1179	0.0018475	-0.217138	0.0220051	5.75e-23	0.0257018	1.385e-17	913	FALSE	1
	cg26266427-chr6:32447873:SNP	cg26266427	Body	NM_019105	TNXB	Island	chr6	32063838	chr6:32447873:SNP	rs4994855	384035	0.137186	0.0119347	1.402e-30	14093	G	A	0.4486	0.0389	TRUE	21	---?---???-?--?-----???--???-???----	17.5	24.2377	0.2322	0.0006455	0.137572	0.0135021	2.221e-24	0.0144635	2.424e-21	913	FALSE	1
	cg26266427-chr6:32797361:SNP	cg26266427	Body	NM_019105	TNXB	Island	chr6	32063838	chr6:32797361:SNP	rs241440	733523	0.147541	0.0102851	1.142e-46	24635	T	C	0.2572	0.0247	TRUE	31	++++++++-++?++++++++?++++???++++++++	16.8	36.071	0.2058	0.0006742	0.146954	0.0116356	1.448e-36	0.0123664	8.18e-33	913	FALSE	1
	cg26266427-chr6:31304284:SNP	cg26266427	Body	NM_019105	TNXB	Island	chr6	32063838	chr6:31304284:SNP	rs28752935	759554	-0.141843	0.0107911	1.83e-39	17073	C	T	0.5033	0.0393	TRUE	22	+++?+++???+?++?+++++??++????++??++++	16.4	25.1241	0.2418	0.0005168	-0.142827	0.012236	1.757e-31	0.0129103	4.421e-28	913	FALSE	1
	cg26266427-chr6:32596838:INDEL	cg26266427	Body	NM_019105	TNXB	Island	chr6	32063838	chr6:32596838:INDEL	chr6:32596838:INDEL	533000	0.141056	0.0148306	1.886e-21	10361	D	I	0.336	0.0363	TRUE	16	+++?+++?????++?+++?+????????+???+?-+	35	23.0864	0.08232	0.0019583	0.138415	0.0194917	1.237e-12	0.0228257	6.423e-10	913	FALSE	1
	cg26266427-chr6:30363351:SNP	cg26266427	Body	NM_019105	TNXB	Island	chr6	32063838	chr6:30363351:SNP	rs3094034		-0.20789	0.0166711	1.087e-35	16735	T	A	0.1248	0.0202	FALSE	24	+++?++++?++?++?+++++?+?-????++?+?+-+	32.9	34.2826	0.06118	0.0033406	-0.197094	0.0215311	5.489e-20	0.024849	5.954e-17	913	FALSE	1
	cg26266427-chr6:32751960:SNP	cg26266427	Body	NM_019105	TNXB	Island	chr6	32063838	chr6:32751960:SNP	rs28986370	688122	0.225659	0.0186116	7.821e-34	21456	A	G	0.0768	0.0144	TRUE	28	+++?+++++++?++?+-+++?++++???++?+++-+	29.5	38.3128	0.07305	0.0041456	0.211637	0.0232654	9.318e-20	0.0264097	1.291e-17	913	FALSE	1
	cg26266427-chr6:32253524:INDEL	cg26266427	Body	NM_019105	TNXB	Island	chr6	32063838	chr6:32253524:INDEL	chr6:32253524:INDEL	189686	-0.189944	0.0138308	6.404e-43	14674	D	I	0.2321	0.0232	TRUE	22	---?---???-?--?+----?-?-????--??----	0	18.7707	0.5998	0	-0.189944	0.0138308	6.404e-43	0.0138308	6.404e-43	913	FALSE	1
	cg26266427-chr6:32443358:SNP	cg26266427	Body	NM_019105	TNXB	Island	chr6	32063838	chr6:32443358:SNP	rs9269111	379520	-0.220246	0.0144363	1.494e-52	13846	G	A	0.2287	0.0349	TRUE	20	+++?+++???+?++?+++++???+???????+++++	17.4	23.0006	0.2373	0.0008941	-0.21951	0.0163122	2.808e-41	0.0174761	2.04e-36	913	FALSE	1
	cg26266427-chr6:31415355:SNP	cg26266427	Body	NM_019105	TNXB	Island	chr6	32063838	chr6:31415355:SNP	rs9267098	648483	-0.151388	0.0142974	3.369e-26	12260	G	C	0.2665	0.0372	TRUE	16	?++??++???+??+??++++??++?????+???+++	45.3	27.4435	0.02532	0.0028331	-0.160157	0.0208708	1.671e-14	0.026158	7.147e-09	913	FALSE	1
	cg26266427-chr6:32756916:INDEL	cg26266427	Body	NM_019105	TNXB	Island	chr6	32063838	chr6:32756916:INDEL	chr6:32756916:INDEL	693078	0.239809	0.0200874	7.479e-33	17986	I	D	0.0788	0.0129	TRUE	24	---?---?-?-?--?-+---?---????--??--+-	32	33.8466	0.06741	0.0046864	0.224993	0.0257635	2.48e-18	0.0295605	4.96e-16	913	FALSE	1
	cg26266427-chr6:32317973:SNP	cg26266427	Body	NM_019105	TNXB	Island	chr6	32063838	chr6:32317973:SNP	rs761188	254135	-0.197944	0.0110542	1.045e-71	17169	G	A	0.3862	0.0405	TRUE	24	+++?++++?++?++?+++++?+?+?????+?+++++	37.4	36.7317	0.03468	0.0017781	-0.198115	0.0145912	5.428e-42	0.0176539	3.541e-29	913	FALSE	1
	cg26266427-chr6:32577497:SNP	cg26266427	Body	NM_019105	TNXB	Island	chr6	32063838	chr6:32577497:SNP	rs536810	513659	0.178195	0.0094084	5.354e-80	23504	T	C	0.4043	0.0299	TRUE	28	+++?++++?+-?+++++++++?++????++++++-+	49.8	53.8217	0.0016	0.0025009	0.174231	0.0140127	1.714e-35	0.0187548	2.073e-21	913	FALSE	1
	cg26266427-chr6:32680970:SNP	cg26266427	Body	NM_019105	TNXB	Island	chr6	32063838	chr6:32680970:SNP	rs7745656	617132	0.158696	0.0121824	8.626e-39	17658	T	G	0.2576	0.0444	TRUE	25	+++?++++?++?+-?+++++?+?++????+?+++++	36	37.4888	0.03908	0.002111	0.155242	0.0157606	6.855e-23	0.0190293	7.456e-17	913	FALSE	1
	cg26266427-chr6:31237333:SNP	cg26266427	Body	NM_019105	TNXB	Island	chr6	32063838	chr6:31237333:SNP	rs66772001	826505	-0.174786	0.0109947	6.611e-57	18176	T	A	0.3387	0.0309	TRUE	23	+++?++?+-++?++?+++++??++????++???+++	12.1	25.0343	0.2954	0.0003943	-0.174755	0.012102	2.894e-47	0.0125111	2.36e-44	913	FALSE	1
	cg26266427-chr6:32750369:SNP	cg26266427	Body	NM_019105	TNXB	Island	chr6	32063838	chr6:32750369:SNP	rs28893551	686531	0.223231	0.0186295	4.378e-33	21455	C	T	0.0767	0.0145	TRUE	28	---?-------?--?-+---?----???--?---+-	31.3	39.3122	0.05933	0.0045204	0.208218	0.0236215	1.199e-18	0.0271247	1.875e-16	913	FALSE	1
	cg26266427-chr6:32392451:SNP	cg26266427	Body	NM_019105	TNXB	Island	chr6	32063838	chr6:32392451:SNP	rs28752486	328613	0.243876	0.0217187	2.942e-29	15752	A	T	0.0766	0.0166	TRUE	23	+++?++++?+??++?+++++?+?++????+??+++-	0	17.1138	0.757	0	0.243876	0.0217187	2.942e-29	0.0217187	2.942e-29	913	FALSE	1
	cg26266427-chr6:32743000:SNP	cg26266427	Body	NM_019105	TNXB	Island	chr6	32063838	chr6:32743000:SNP	rs2621412	679162	0.109871	0.0102176	5.727e-27	20969	C	A	0.3477	0.0366	TRUE	27	---?----+-+?--?-----?----????-?-----	27.9	36.0755	0.09029	0.0011143	0.109779	0.0126038	3.039e-18	0.0141771	9.196e-15	913	FALSE	1
	cg26266427-chr6:32748137:SNP	cg26266427	Body	NM_019105	TNXB	Island	chr6	32063838	chr6:32748137:SNP	rs28986335	684299	0.224249	0.0186245	2.174e-33	21454	T	A	0.0768	0.0143	TRUE	28	---?-------?--?-+---?----???--?---+-	30.1	38.6528	0.06811	0.0042763	0.209655	0.0233971	3.225e-19	0.0266626	4.078e-17	913	FALSE	1
	cg26266427-chr6:31238490:SNP	cg26266427	Body	NM_019105	TNXB	Island	chr6	32063838	chr6:31238490:SNP	rs9264642	825348	-0.148063	0.0103325	1.423e-46	19740	T	C	0.3814	0.0331	TRUE	25	---?----+--?--?-----??--????--?-?---	0.1	24.0329	0.4597	3.7e-06	-0.148064	0.0103435	1.77e-46	0.0103466	1.887e-46	913	FALSE	1
	cg26266427-chr6:32316081:SNP	cg26266427	Body	NM_019105	TNXB	Island	chr6	32063838	chr6:32316081:SNP	rs969893	252243	-0.194943	0.0108957	1.367e-71	17655	A	C	0.3868	0.04	TRUE	25	---?----?--?--?-----?-?-????--?-----	39.7	39.8252	0.02233	0.0019859	-0.194388	0.0146652	4.221e-40	0.0180801	4.18e-27	913	FALSE	1
	cg26266427-chr6:31337006:SNP	cg26266427	Body	NM_019105	TNXB	Island	chr6	32063838	chr6:31337006:SNP	rs2523531	726832	-0.177523	0.0103332	3.754e-66	20967	A	G	0.3285	0.0393	TRUE	27	---?-------?--?-----?---????--?-----	29.8	37.0273	0.07433	0.0012488	-0.180876	0.0129986	5.134e-44	0.0147157	1.647e-33	913	FALSE	1
	cg26266427-chr6:31939524:SNP	cg26266427	Body	NM_019105	TNXB	Island	chr6	32063838	chr6:31939524:SNP	rs115085021	124314	0.614477	0.0427266	6.75e-47	17079	C	A	0.0182	0.0058	TRUE	21	---?--???--?--??---??---?????-?-----	0	18.3967	0.5613	0	0.614477	0.0427266	6.75e-47	0.0427266	6.75e-47	913	FALSE	1
	cg26266427-chr6:32654149:SNP	cg26266427	Body	NM_019105	TNXB	Island	chr6	32063838	chr6:32654149:SNP	rs3134971	590311	-0.361635	0.0156167	1.24e-118	16587	C	A	0.1427	0.018	TRUE	23	+++?++++?++?++?+++++???+????++??++++	32.7	32.6706	0.06666	0.0027626	-0.360582	0.0197991	4.138e-74	0.0231912	8.048e-55	913	FALSE	1
	cg26266427-chr6:31289434:SNP	cg26266427	Body	NM_019105	TNXB	Island	chr6	32063838	chr6:31289434:SNP	rs9265177	774404	-0.115171	0.0115435	0	16200	C	G	0.376	0.0429	TRUE	21	---?--????-?--?-----??--????--??--+-	41.2	34.0003	0.02612	0.0020266	-0.120119	0.0161732	1.111e-13	0.0196242	4.388e-09	913	FALSE	1
	cg26266427-chr6:31325702:SNP	cg26266427	Body	NM_019105	TNXB	Island	chr6	32063838	chr6:31325702:SNP	rs9266245	738136	-0.194547	0.0111673	5.707e-68	19871	A	G	0.279	0.0378	TRUE	25	---?+---+--?--?-----??--????--??----	17.3	29.0107	0.2197	0.0006669	-0.193927	0.0127669	4.132e-52	0.0134988	4.341e-47	913	FALSE	1
	cg26266427-chr6:31450702:SNP	cg26266427	Body	NM_019105	TNXB	Island	chr6	32063838	chr6:31450702:SNP	rs2860233	613136	-0.160167	0.0103551	5.751e-54	21459	A	G	0.3119	0.021	TRUE	28	---?-------?--?-----?----???--?-----	41.4	46.1142	0.01237	0.0021664	-0.16414	0.0142818	1.432e-30	0.0176858	1.35e-19	913	FALSE	1
	cg26266427-chr6:32063896:SNP	cg26266427	Body	NM_019105	TNXB	Island	chr6	32063838	chr6:32063896:SNP	rs41270458	58	0.49586	0.0305768	3.832e-59	20929	A	G	0.0273	0.0067	TRUE	27	+++++++++++?++?+-+++?+++?????+?+++++	0	24.1777	0.5658	0	0.49586	0.0305768	3.832e-59	0.0305768	3.832e-59	913	FALSE	1
	cg26266427-chr6:31444187:SNP	cg26266427	Body	NM_019105	TNXB	Island	chr6	32063838	chr6:31444187:SNP	rs12524498	619651	0.395919	0.0380574	2.397e-25	17089	T	G	0.0226	0.0062	TRUE	21	+++??++??++?++?+++?+?+++?????+?++?++	0	16.8585	0.6621	0	0.395919	0.0380574	2.397e-25	0.0380574	2.397e-25	913	FALSE	1
	cg26266427-chr6:32739967:SNP	cg26266427	Body	NM_019105	TNXB	Island	chr6	32063838	chr6:32739967:SNP	rs1383264	676129	-0.0897244	0.0105997	2.566e-17	18192	A	T	0.442	0.0448	TRUE	24	---??+-?+?-?--?-----?---????--?-----	8.5	25.1393	0.3431	0.0002576	-0.0890735	0.0113399	4.001e-15	0.0115856	9.597e-15	913	FALSE	1
	cg26266427-chr6:30744200:SNP	cg26266427	Body	NM_019105	TNXB	Island	chr6	32063838	chr6:30744200:SNP	rs3132603		-0.191851	0.0154768	2.746e-35	17200	T	C	0.1415	0.024	FALSE	25	---?----?--?--?-----?-?+-???--?+?---	43.7	42.6193	0.01099	0.0047338	-0.179981	0.0219219	2.21e-16	0.0274838	2.941e-12	913	FALSE	1
	cg26266427-chr6:32451944:SNP	cg26266427	Body	NM_019105	TNXB	Island	chr6	32063838	chr6:32451944:SNP	rs2395203	388106	0.181412	0.0224624	6.68e-16	5675	A	G	0.7732	0.0342	TRUE	7	+???+?+?????+??+????????????+???+???	0	4.90674	0.5558	0	0.181412	0.0224624	6.68e-16	0.0224624	6.68e-16	913	FALSE	1
	cg26266427-chr6:31315357:SNP	cg26266427	Body	NM_019105	TNXB	Island	chr6	32063838	chr6:31315357:SNP	rs9265955	748481	-0.114899	0.0131506	2.389e-18	12265	C	A	0.3955	0.0461	TRUE	16	?++??++???+??+??++++??++?????+???+-+	42.1	25.9154	0.03892	0.002112	-0.123203	0.0186859	4.299e-11	0.0227202	4.256e-07	913	FALSE	1
	cg26266427-chr6:32598971:SNP	cg26266427	Body	NM_019105	TNXB	Island	chr6	32063838	chr6:32598971:SNP	rs9272044	535133	-0.108235	0.0117026	2.27e-20	14711	A	C	0.4864	0.0368	TRUE	21	---?----?--?--?+----???-????-???+?--	37.1	31.7834	0.04566	0.0017263	-0.107248	0.0154568	3.96e-12	0.0185974	5.888e-09	913	FALSE	1
	cg26266427-chr6:31643251:SNP	cg26266427	Body	NM_019105	TNXB	Island	chr6	32063838	chr6:31643251:SNP	rs805271	420587	0.157544	0.0111234	1.547e-45	20916	T	A	0.2655	0.0417	TRUE	27	----?------?--?-----?---????--?-----	3.8	27.0163	0.4085	0.0001332	0.157632	0.0114471	3.838e-43	0.0115582	2.639e-42	913	FALSE	1
	cg26266427-chr6:32777605:SNP	cg26266427	Body	NM_019105	TNXB	Island	chr6	32063838	chr6:32777605:SNP	rs2857120	713767	0.118819	0.0097028	1.768e-34	24643	C	T	0.3095	0.0337	TRUE	31	--------+--?--------?---+???--------	25.9	40.4794	0.09591	0.001036	0.117391	0.011756	1.761e-23	0.0130921	1.13e-19	913	FALSE	1
	cg26266427-chr6:32575391:SNP	cg26266427	Body	NM_019105	TNXB	Island	chr6	32063838	chr6:32575391:SNP	rs2858866	511553	-0.19968	0.0130257	4.844e-53	13020	C	G	0.3421	0.0284	TRUE	19	---?---??-??--?-----????????-??--?--	38.8	29.3891	0.04383	0.0020839	-0.19683	0.0174749	1.985e-29	0.0212675	6.058e-21	913	FALSE	1
	cg26266427-chr6:31243895:SNP	cg26266427	Body	NM_019105	TNXB	Island	chr6	32063838	chr6:31243895:SNP	rs3094680	819943	-0.146652	0.0100273	1.937e-48	20412	C	T	0.4124	0.0258	TRUE	26	+++?++++?++?++?+++++?+++????++?+++++	0	15.772	0.9214	0	-0.146652	0.0100273	1.937e-48	0.0100273	1.937e-48	913	FALSE	1
	cg26266427-chr6:31314274:SNP	cg26266427	Body	NM_019105	TNXB	Island	chr6	32063838	chr6:31314274:SNP	rs7749555	749564	-0.326222	0.0145309	1.27e-111	19901	G	A	0.139	0.0208	TRUE	25	+++?+++++++?++?+++++??++????++??++++	19.8	29.9282	0.1871	0.0013387	-0.327798	0.016996	6.944e-83	0.0181202	1.837e-72	913	FALSE	1
	cg26266427-chr6:31236622:SNP	cg26266427	Body	NM_019105	TNXB	Island	chr6	32063838	chr6:31236622:SNP	rs1130538	827216	-0.170556	0.0117101	4.697e-48	15329	C	A	0.3741	0.0331	TRUE	20	+++?++????+?++?+++++??++????++???+++	27.6	26.2276	0.124	0.0010794	-0.171754	0.0145858	5.226e-32	0.0161646	5.014e-26	913	FALSE	1
	cg26266427-chr6:31018908:SNP	cg26266427	Body	NM_019105	TNXB	Island	chr6	32063838	chr6:31018908:SNP	rs3131920		-0.239246	0.0144967	3.465e-61	20001	G	T	0.1414	0.0257	FALSE	26	+++?++?++++?++?+++++?++-????++?+++-+	28.7	35.0774	0.08681	0.0022727	-0.23186	0.0184666	3.701e-36	0.0203402	6.113e-32	913	FALSE	1
	cg26266427-chr6:32590899:SNP	cg26266427	Body	NM_019105	TNXB	Island	chr6	32063838	chr6:32590899:SNP	rs9271586	527061	0.146879	0.0107558	1.864e-42	17085	T	G	0.4879	0.036	TRUE	24	+++?++++?++?++?+++++???++???+??+++++	27.6	31.7768	0.1049	0.0010751	0.147167	0.0130941	2.618e-29	0.0148602	4.881e-23	913	FALSE	1
	cg26266427-chr6:32594217:SNP	cg26266427	Body	NM_019105	TNXB	Island	chr6	32063838	chr6:32594217:SNP	rs9271769	530379	0.139174	0.0128639	2.8e-27	13900	T	G	0.3315	0.0378	TRUE	19	+++?+?++?++?++?+++?+????????+??++?-+	23.2	23.4292	0.1746	0.0009698	0.139003	0.0152493	7.838e-20	0.0167439	9.419e-17	913	FALSE	1
	cg26266427-chr6:31306862:SNP	cg26266427	Body	NM_019105	TNXB	Island	chr6	32063838	chr6:31306862:SNP	rs28367833	756976	0.140363	0.0123732	7.939e-30	13066	A	G	0.4773	0.0497	TRUE	18	?++??+????+?++?+++++??++????++???+++	0	16.4887	0.4895	0	0.140363	0.0123732	7.939e-30	0.0123732	7.939e-30	913	FALSE	1
	cg26266427-chr6:30231666:SNP	cg26266427	Body	NM_019105	TNXB	Island	chr6	32063838	chr6:30231666:SNP	rs3132658		-0.150971	0.0143608	0	17092	C	T	0.166	0.0219	FALSE	24	+++?++++?++?++?+++++?-?-?????+?+++-+	30.2	32.9591	0.08178	0.0021795	-0.143772	0.0179502	1.152e-15	0.0205791	2.199e-13	913	FALSE	1
	cg26266427-chr6:32433561:SNP	cg26266427	Body	NM_019105	TNXB	Island	chr6	32063838	chr6:32433561:SNP	rs9268940	369723	-0.194238	0.017432	7.779e-29	8419	A	G	0.2705	0.0344	TRUE	14	?--??--???-??-??-?--???-?????-???---	16.5	15.5757	0.2728	0.0008646	-0.193981	0.0195651	3.597e-23	0.0208858	1.404e-20	913	FALSE	1
	cg26266427-chr6:32592565:SNP	cg26266427	Body	NM_019105	TNXB	Island	chr6	32063838	chr6:32592565:SNP	rs9271654	528727	-0.14741	0.0153174	0	9875	A	G	0.3112	0.0343	TRUE	14	---?-?-???-?--?-?-??????????-???-?--	47.3	24.6752	0.02546	0.0030252	-0.144684	0.0221803	6.887e-11	0.0290738	3.974e-07	913	FALSE	1
	cg26266427-chr6:31116210:SNP	cg26266427	Body	NM_019105	TNXB	Island	chr6	32063838	chr6:31116210:SNP	rs130071	947628	-0.112261	0.0102252	4.826e-28	23168	A	G	0.2944	0.0179	TRUE	28	---?-+--+--?--------?---?????-----+-	12	30.6773	0.2846	0.0004061	-0.110993	0.0111775	3.082e-23	0.0116178	4.335e-22	913	FALSE	1
	cg26266427-chr6:31326324:SNP	cg26266427	Body	NM_019105	TNXB	Island	chr6	32063838	chr6:31326324:SNP	rs2596475	737514	-0.126205	0.0099601	8.562e-37	21162	C	T	0.3842	0.0322	TRUE	27	++++-++?-++?++++++++?-++????++??++++	42.6	45.3242	0.01084	0.002035	-0.121489	0.0139929	3.882e-18	0.0173628	3.631e-13	913	FALSE	1
	cg26266427-chr6:32753053:SNP	cg26266427	Body	NM_019105	TNXB	Island	chr6	32063838	chr6:32753053:SNP	rs13215244	689215	0.224292	0.01856	1.272e-33	21413	A	G	0.0775	0.0145	TRUE	28	+++?+++++++?++?+-+++?++++???++?+++-+	31.4	39.3548	0.0588	0.0045011	0.208946	0.0235329	6.753e-19	0.0270528	1.124e-16	913	FALSE	1
	cg26266427-chr6:32595783:SNP	cg26266427	Body	NM_019105	TNXB	Island	chr6	32063838	chr6:32595783:SNP	rs9271891	531945	-0.11102	0.0121757	7.638e-20	13688	T	G	0.4818	0.0324	TRUE	19	---?---??--?--?+----???????????-+?+-	44.7	32.5272	0.01903	0.0023228	-0.109912	0.0172863	2.04e-10	0.0220023	4.515e-07	913	FALSE	1
	cg26266427-chr6:31243979:SNP	cg26266427	Body	NM_019105	TNXB	Island	chr6	32063838	chr6:31243979:SNP	rs2844611	819859	-0.177306	0.0102736	9.672e-67	21446	T	A	0.3203	0.0315	TRUE	28	+++?+++++++?++?+++++?++++???++?+++++	0	26.5794	0.4867	0	-0.177306	0.0102736	9.672e-67	0.0102736	9.672e-67	913	FALSE	1
	cg26266427-chr6:32585924:SNP	cg26266427	Body	NM_019105	TNXB	Island	chr6	32063838	chr6:32585924:SNP	rs28383265	522086	0.264155	0.0178618	1.73e-49	13320	T	C	0.1447	0.029	TRUE	19	?++?++++????++?+++++??++????+????+++	13.6	20.8387	0.2876	0.0009851	0.262732	0.0198351	4.77e-40	0.0206787	2.283e-37	913	FALSE	1
	cg26266427-chr6:31320654:SNP	cg26266427	Body	NM_019105	TNXB	Island	chr6	32063838	chr6:31320654:SNP	rs2523614	743184	0.131691	0.0117943	6.005e-29	17804	C	T	0.2829	0.03	TRUE	23	---?---???-?--?-----??--????--?-----	0	18.2389	0.6917	0	0.131691	0.0117943	6.005e-29	0.0117943	6.005e-29	913	FALSE	1
	cg26266427-chr6:32768171:SNP	cg26266427	Body	NM_019105	TNXB	Island	chr6	32063838	chr6:32768171:SNP	rs13212256	704333	0.218174	0.0187407	2.528e-31	21055	A	T	0.0771	0.0144	TRUE	28	++++++?++++?++?+-+++?++++???++?+++-+	24.4	35.7088	0.1218	0.0032379	0.205503	0.0225281	7.368e-20	0.0247855	1.338e-18	913	FALSE	1
	cg26266427-chr6:31098193:SNP	cg26266427	Body	NM_019105	TNXB	Island	chr6	32063838	chr6:31098193:SNP	rs13212168	965645	0.192407	0.0166754	8.453e-31	14127	C	T	0.1511	0.012	TRUE	17	?--??-????-??--?----??--?????--??-+-	22.4	20.6053	0.1942	0.0014089	0.189898	0.0198349	1.029e-21	0.0214752	3.262e-19	913	FALSE	1
	cg26266427-chr6:31903121:SNP	cg26266427	Body	NM_019105	TNXB	Island	chr6	32063838	chr6:31903121:SNP	rs621701	160717	0.281107	0.0183126	3.518e-53	24627	A	G	0.0716	0.0183	TRUE	31	+++++++++++?++++-+++?++++???++++++++	19.2	37.13	0.1734	0.002511	0.280519	0.0211167	2.856e-40	0.0226649	2.526e-35	913	FALSE	1
	cg26266427-chr6:31219289:SNP	cg26266427	Body	NM_019105	TNXB	Island	chr6	32063838	chr6:31219289:SNP	rs11962994	844549	0.0898733	0.0125667	8.57e-13	21440	A	G	0.1874	0.0294	TRUE	28	+++?+++++++?++?--+++?++++???++?+++-+	0	25.6477	0.5382	0	0.0898733	0.0125667	8.57e-13	0.0125667	8.57e-13	913	FALSE	1
	cg26266427-chr6:31275707:SNP	cg26266427	Body	NM_019105	TNXB	Island	chr6	32063838	chr6:31275707:SNP	rs1619716	788131	0.289084	0.0355858	4.526e-16	18373	A	G	0.024	0.0074	TRUE	21	+++?+++-?+??++?+?+++??+-+????+?+++??	45.1	36.4356	0.01366	0.0220445	0.286878	0.0491971	5.503e-09	0.0648295	8.229e-06	913	FALSE	1
	cg26266427-chr6:32394313:SNP	cg26266427	Body	NM_019105	TNXB	Island	chr6	32063838	chr6:32394313:SNP	rs2395170	330475	-0.229643	0.0137687	0	17167	C	A	0.1917	0.021	TRUE	24	+++?++++?++?++?+++++?+?+?????+?+++++	43.3	40.5603	0.01329	0.0035264	-0.231298	0.0191859	1.812e-33	0.024281	3.148e-21	913	FALSE	1
	cg26266427-chr6:32599512:SNP	cg26266427	Body	NM_019105	TNXB	Island	chr6	32063838	chr6:32599512:SNP	rs77559661	535674	-0.262952	0.0189392	7.92e-44	7680	T	A	0.234	0.0283	TRUE	12	?++???+???+??+??++++?????????????+++	29.7	15.6428	0.1549	0.0018704	-0.264614	0.0235421	2.592e-29	0.0269328	1.619e-22	913	FALSE	1
	cg26266427-chr6:30165662:SNP	cg26266427	Body	NM_019105	TNXB	Island	chr6	32063838	chr6:30165662:SNP	rs2517613		-0.16454	0.0152392	3.551e-27	16252	A	G	0.1525	0.0225	FALSE	23	---?----?--?--?-----?+?+?????-?-?-+-	32.9	32.7869	0.06493	0.0026699	-0.154978	0.0195605	2.318e-15	0.0227113	4.328e-13	913	FALSE	1
	cg26266427-chr6:32453037:SNP	cg26266427	Body	NM_019105	TNXB	Island	chr6	32063838	chr6:32453037:SNP	rs28372285	389199	0.140332	0.0136435	8.183e-25	10995	T	C	0.4399	0.0438	TRUE	17	+++??++?????++?++++????+????+???++++	17.3	19.3558	0.2506	0.000682	0.140822	0.0154998	1.033e-19	0.0165051	1.858e-17	913	FALSE	1
	cg26266427-chr6:32750650:SNP	cg26266427	Body	NM_019105	TNXB	Island	chr6	32063838	chr6:32750650:SNP	rs28986351	686812	0.226074	0.018602	0	21455	T	C	0.0769	0.0143	TRUE	28	+++?+++++++?++?+-+++?++++???++?+++-+	29.5	38.2807	0.07353	0.0041293	0.212005	0.023239	7.321e-20	0.026374	1.019e-17	913	FALSE	1
	cg26266427-chr6:31361325:SNP	cg26266427	Body	NM_019105	TNXB	Island	chr6	32063838	chr6:31361325:SNP	rs2428477	702513	0.211395	0.0180394	1.024e-31	20897	A	T	0.0914	0.0301	TRUE	27	+++?++++?++?++?+++++?++++???++?+++++	14.3	30.3502	0.2534	0.0014946	0.210422	0.0200187	7.667e-26	0.0210576	1.028e-23	913	FALSE	1
	cg26266427-chr6:32929943:SNP	cg26266427	Body	NM_019105	TNXB	Island	chr6	32063838	chr6:32929943:SNP	rs116131925	866105	-0.338754	0.0163527	0	24144	T	A	0.0861	0.013	TRUE	30	+++++++++++?++++++++?+++????++++++++	12.9	33.3078	0.2655	0.0012148	-0.34306	0.0180664	2.107e-80	0.0187817	1.01e-72	913	FALSE	1
	cg26266427-chr6:32226126:SNP	cg26266427	Body	NM_019105	TNXB	Island	chr6	32063838	chr6:32226126:SNP	rs116153975	162288	-0.194773	0.0125601	3.097e-54	17644	C	T	0.2364	0.023	TRUE	25	+++?++++?++?++?-++++?+?+????++?+++++	0	23.2618	0.5044	0	-0.194773	0.0125601	3.097e-54	0.0125601	3.097e-54	913	FALSE	1
	cg26266427-chr6:31238138:SNP	cg26266427	Body	NM_019105	TNXB	Island	chr6	32063838	chr6:31238138:SNP	rs1050320	825700	-0.180977	0.0133027	3.765e-42	12262	C	T	0.3465	0.0239	TRUE	16	?++??++???+??+??++++??++?????+???+++	0	13.7422	0.5452	0	-0.180977	0.0133027	3.765e-42	0.0133027	3.765e-42	913	FALSE	1
	cg26266427-chr6:32561068:SNP	cg26266427	Body	NM_019105	TNXB	Island	chr6	32063838	chr6:32561068:SNP	rs9270576	497230	-0.109425	0.015355	1.031e-12	8602	T	C	0.4307	0.0454	TRUE	12	-???-?-???-?--?-?-??????????-???-?--	20.5	13.8293	0.2426	0.0007546	-0.107661	0.0178561	1.646e-09	0.0193045	1.442e-08	913	FALSE	1
	cg26266427-chr6:29850720:SNP	cg26266427	Body	NM_019105	TNXB	Island	chr6	32063838	chr6:29850720:SNP	rs1611579		-0.213072	0.0200077	1.752e-26	12055	C	T	0.1195	0.0219	FALSE	18	+++??+????+?++?+-+++???+????++???+++	2.7	17.4651	0.4233	0.0002033	-0.212256	0.0204263	2.716e-25	0.0205551	3.543e-25	913	FALSE	1
	cg26266427-chr6:32189921:SNP	cg26266427	Body	NM_019105	TNXB	Island	chr6	32063838	chr6:32189921:SNP	rs3134796	126083	-0.325693	0.0138112	5.93e-123	20384	G	A	0.1465	0.0174	TRUE	26	+++?++++?++?++?+++++?+++????++?+++++	30.4	35.943	0.07247	0.002223	-0.329837	0.0175003	3.081e-79	0.0198567	1.845e-60	913	FALSE	1
	cg26266427-chr6:32435159:SNP	cg26266427	Body	NM_019105	TNXB	Island	chr6	32063838	chr6:32435159:SNP	rs9268982	371321	-0.182546	0.012515	3.438e-48	16565	T	C	0.2652	0.0334	TRUE	23	---?----?--?--?-----???-????--??----	30.2	31.5075	0.08619	0.001579	-0.180791	0.0155142	2.208e-31	0.0179234	2.319e-24	913	FALSE	1
	cg26266427-chr6:31240307:INDEL	cg26266427	Body	NM_019105	TNXB	Island	chr6	32063838	chr6:31240307:INDEL	chr6:31240307:INDEL	823531	-0.180882	0.0113546	3.908e-57	17144	I	D	0.3362	0.0343	TRUE	23	+++?+++?+?+?++?+++++?+++????++???+++	7.7	23.845	0.3554	0.0002564	-0.181145	0.0121016	1.176e-50	0.0123069	6.675e-49	913	FALSE	1
	cg26266427-chr6:31972081:SNP	cg26266427	Body	NM_019105	TNXB	Island	chr6	32063838	chr6:31972081:SNP	rs760069	91757	0.431754	0.0196976	1.71e-106	11396	C	G	0.1322	0.0151	TRUE	15	?++??+????+??+??++++??++?????+???+++	45.2	25.5584	0.02944	0.0050332	0.420569	0.028759	1.978e-48	0.0359598	3.282e-33	913	FALSE	1
	cg26266427-chr6:30725841:SNP	cg26266427	Body	NM_019105	TNXB	Island	chr6	32063838	chr6:30725841:SNP	rs3095326		-0.198299	0.0155879	4.499e-37	17089	T	C	0.1412	0.0243	FALSE	24	---?----?--?--?-----?-?+?????-?+--+-	47.8	44.0939	0.005123	0.0054527	-0.185648	0.0230787	8.688e-16	0.0298839	3.231e-11	913	FALSE	1
	cg26266427-chr6:31972370:SNP	cg26266427	Body	NM_019105	TNXB	Island	chr6	32063838	chr6:31972370:SNP	rs28552706	91468	0.206304	0.0185675	1.109e-28	20049	C	G	0.0778	0.0138	TRUE	26	+++?++?++++?++?+++++?+++????++?+-+++	28	34.7365	0.09308	0.0035519	0.208585	0.0227981	5.736e-20	0.0257988	1.278e-15	913	FALSE	1
	cg26266427-chr6:32231547:SNP	cg26266427	Body	NM_019105	TNXB	Island	chr6	32063838	chr6:32231547:SNP	rs3130332	167709	-0.194256	0.0123967	2.427e-55	17626	T	A	0.2442	0.0219	TRUE	25	+++??+++?++?++?-++++?+?++???++?+++++	18.7	29.5275	0.2009	0.0008977	-0.194642	0.0141305	3.626e-43	0.0152518	3.703e-37	913	FALSE	1
	cg26266427-chr6:32388574:SNP	cg26266427	Body	NM_019105	TNXB	Island	chr6	32063838	chr6:32388574:SNP	rs2213580	324736	-0.23883	0.0139427	8.946e-66	17169	C	T	0.1857	0.0203	TRUE	24	+++?++++?++?++?+++++?+?+?????+?+++++	43.3	40.5817	0.01322	0.0036208	-0.241308	0.0194392	2.208e-35	0.0246007	2.78e-22	913	FALSE	1
	cg26266427-chr6:31679465:SNP	cg26266427	Body	NM_019105	TNXB	Island	chr6	32063838	chr6:31679465:SNP	rs805285	384373	0.171067	0.0111932	9.92e-53	21412	C	G	0.2535	0.0451	TRUE	28	++++++++++-?++?+++++?+++????++?+++++	42.9	47.2686	0.009256	0.002684	0.172513	0.0156315	2.556e-28	0.0195959	2.553e-18	913	FALSE	1
	cg26266427-chr6:31315792:SNP	cg26266427	Body	NM_019105	TNXB	Island	chr6	32063838	chr6:31315792:SNP	rs9265971	748046	-0.329645	0.0142496	0	20621	C	T	0.1393	0.0205	TRUE	26	+++?+++++++?++?+++++??++????++?+++++	20.4	31.3879	0.1765	0.0013822	-0.33158	0.0167044	1.105e-87	0.0178906	8.18e-76	913	FALSE	1
	cg26266427-chr6:32573950:SNP	cg26266427	Body	NM_019105	TNXB	Island	chr6	32063838	chr6:32573950:SNP	rs2647072	510112	0.263374	0.014194	0	21627	T	G	0.1361	0.0242	TRUE	26	+++?++++++??+++++++++?+?????+++?++++	30.7	36.0684	0.07057	0.0023578	0.261728	0.0178283	8.595e-49	0.0204782	7.445e-38	913	FALSE	1
	cg26266427-chr6:30894965:SNP	cg26266427	Body	NM_019105	TNXB	Island	chr6	32063838	chr6:30894965:SNP	rs3094088		-0.214917	0.0154684	6.895e-44	17574	A	T	0.1417	0.0246	FALSE	25	---?----?--?--?-----?-?+????--?-----	26.6	32.6968	0.1106	0.0022101	-0.206931	0.0189481	9.154e-28	0.0210736	2.016e-24	913	FALSE	1
	cg26266427-chr6:32587536:SNP	cg26266427	Body	NM_019105	TNXB	Island	chr6	32063838	chr6:32587536:SNP	rs9271403	523698	0.176279	0.0133697	1.071e-39	11916	G	A	0.3907	0.0282	TRUE	18	---?---?????--?-----????????-???--+-	45.1	30.9676	0.02015	0.0027082	0.173914	0.0190846	8.027e-20	0.0243547	4.553e-13	913	FALSE	1
	cg26266427-chr6:32560875:SNP	cg26266427	Body	NM_019105	TNXB	Island	chr6	32063838	chr6:32560875:SNP	rs28366300	497037	0.11595	0.0126215	4.053e-20	14655	T	C	0.3188	0.0473	TRUE	21	+??+++?++++?++?+++++???+????+???++-+	0	15.1685	0.7667	0	0.11595	0.0126215	4.053e-20	0.0126215	4.053e-20	913	FALSE	1
	cg26266427-chr6:32749795:SNP	cg26266427	Body	NM_019105	TNXB	Island	chr6	32063838	chr6:32749795:SNP	rs116705240	685957	0.113333	0.0101939	1.029e-28	20186	T	A	0.3832	0.0308	TRUE	26	---?+--?---?--?-+---?---????--?-----	25.3	33.4514	0.1202	0.0009327	0.111352	0.01234	1.818e-19	0.01364	9.663e-17	913	FALSE	1
	cg26266427-chr6:31345376:SNP	cg26266427	Body	NM_019105	TNXB	Island	chr6	32063838	chr6:31345376:SNP	rs2442744	718462	-0.175957	0.0108562	4.428e-59	18291	T	C	0.3547	0.0371	TRUE	23	---?--???--?--?-----?---?????-?-----	37.9	35.4099	0.03509	0.0016969	-0.18127	0.0147004	6.167e-35	0.0174735	7.503e-24	913	FALSE	1
	cg26266427-chr6:32218120:SNP	cg26266427	Body	NM_019105	TNXB	Island	chr6	32063838	chr6:32218120:SNP	rs9267986	154282	-0.403263	0.0159863	2.1e-140	17648	A	G	0.1272	0.02	TRUE	25	---?----?--?--?-----?-?-????--?-----	42.7	41.8691	0.01335	0.0048314	-0.406658	0.0222417	1.118e-74	0.0278888	2.177e-47	913	FALSE	1
	cg26266427-chr6:32276172:SNP	cg26266427	Body	NM_019105	TNXB	Island	chr6	32063838	chr6:32276172:SNP	rs9268183	212334	-0.204824	0.0128183	1.789e-57	17366	A	G	0.2297	0.0272	TRUE	25	---?----?--?--?+----?-?--???--??----	3.8	24.9608	0.4079	0.0001669	-0.204693	0.0131628	1.571e-54	0.0133315	2.855e-53	913	FALSE	1
	cg26266427-chr6:32575746:SNP	cg26266427	Body	NM_019105	TNXB	Island	chr6	32063838	chr6:32575746:SNP	rs3021303	511908	-0.198926	0.0130268	1.203e-52	13020	T	G	0.3421	0.0278	TRUE	19	---?---??-??--?-----????????-??--?--	38.8	29.4205	0.04348	0.0020903	-0.195805	0.0174911	4.336e-29	0.021292	9.387e-21	913	FALSE	1
	cg26266427-chr6:31095270:SNP	cg26266427	Body	NM_019105	TNXB	Island	chr6	32063838	chr6:31095270:SNP	rs9263708	968568	-0.2156	0.0108088	1.603e-88	24122	C	T	0.2356	0.045	TRUE	30	+++++++++++?++++++++?+++????++++++++	7.4	31.3157	0.3507	0.0002848	-0.215484	0.0114266	2.519e-79	0.011672	3.493e-76	913	FALSE	1
	cg26266427-chr6:32383249:SNP	cg26266427	Body	NM_019105	TNXB	Island	chr6	32063838	chr6:32383249:SNP	rs9268532	319411	-0.227004	0.0139072	6.801e-60	16933	C	T	0.1881	0.0224	TRUE	24	+++?++++?++?++?+++++?+?+????++??++++	36.6	36.2528	0.03887	0.0027158	-0.22926	0.0182643	3.856e-36	0.0219207	3.942e-25	913	FALSE	1
	cg26266427-chr6:31332527:SNP	cg26266427	Body	NM_019105	TNXB	Island	chr6	32063838	chr6:31332527:SNP	rs2523548	731311	-0.131233	0.0099253	6.551e-40	20406	A	G	0.4511	0.0301	TRUE	26	---?----?--?--?-----?---????--?-----	0	21.351	0.6729	0	-0.131233	0.0099253	6.551e-40	0.0099253	6.551e-40	913	FALSE	1
	cg26266427-chr6:32766345:SNP	cg26266427	Body	NM_019105	TNXB	Island	chr6	32063838	chr6:32766345:SNP	rs7383562	702507	-0.160401	0.0101999	1.007e-55	20975	G	A	0.3353	0.0268	TRUE	27	+++?+++++++?++?+++++?++++????+?+++++	34.9	39.9083	0.03983	0.0015321	-0.160511	0.0132962	1.486e-33	0.0156561	1.243e-24	913	FALSE	1
	cg26266427-chr6:31467365:SNP	cg26266427	Body	NM_019105	TNXB	Island	chr6	32063838	chr6:31467365:SNP	rs2855804	596473	-0.192019	0.0096543	5.023e-88	24634	T	C	0.3166	0.022	TRUE	31	-----------?--------?----???--------	34.9	46.1092	0.03034	0.0015761	-0.194102	0.0125691	8.439e-54	0.0148384	2.653e-38	913	FALSE	1
	cg26266427-chr6:32440771:SNP	cg26266427	Body	NM_019105	TNXB	Island	chr6	32063838	chr6:32440771:SNP	rs9269073	376933	-0.210176	0.0144563	6.89e-48	14310	G	A	0.2201	0.0395	TRUE	21	+++?+++???+?++?+++++???+????+??+++++	24.3	26.4283	0.1521	0.0014351	-0.208822	0.0171741	5.129e-34	0.0191028	3.722e-28	913	FALSE	1
	cg26266427-chr6:32758843:SNP	cg26266427	Body	NM_019105	TNXB	Island	chr6	32063838	chr6:32758843:SNP	rs28986423	695005	0.226086	0.0186021	5.476e-34	21454	A	G	0.0769	0.0144	TRUE	28	+++?+++++++?++?+-+++?++++???++?+++-+	29.8	38.4709	0.07071	0.0041991	0.211915	0.0233049	9.619e-20	0.0265052	1.465e-17	913	FALSE	1
	cg26266427-chr6:31574900:SNP	cg26266427	Body	NM_019105	TNXB	Island	chr6	32063838	chr6:31574900:SNP	rs28366149	488938	0.14242	0.0122919	4.829e-31	20366	A	G	0.2058	0.0351	TRUE	26	+++?-+++?++?++?+++++?+++????++?+++++	16.6	29.9629	0.2257	0.0007958	0.142566	0.0139167	1.256e-24	0.0147321	4.151e-22	913	FALSE	1
	cg26266427-chr6:31239868:SNP	cg26266427	Body	NM_019105	TNXB	Island	chr6	32063838	chr6:31239868:SNP	rs9264674	823970	-0.179142	0.0106707	0	19352	G	C	0.3381	0.0321	TRUE	25	+++?+++++++?++?+++++?+++????++???+++	1.7	24.4181	0.4379	5.09e-05	-0.179203	0.0108203	1.316e-61	0.0108566	3.626e-61	913	FALSE	1
	cg26266427-chr6:32436250:SNP	cg26266427	Body	NM_019105	TNXB	Island	chr6	32063838	chr6:32436250:SNP	rs76914018	372412	0.145095	0.0108384	7.192e-41	19306	T	A	0.3455	0.0541	TRUE	24	---?----?--?--?-----??--????--??--+-	33.3	34.473	0.05862	0.0014348	0.143704	0.0139617	7.603e-25	0.0162449	4.194e-19	913	FALSE	1
	cg26266427-chr6:31161229:SNP	cg26266427	Body	NM_019105	TNXB	Island	chr6	32063838	chr6:31161229:SNP	rs1265178	902609	-0.118717	0.0119475	2.888e-23	20482	A	G	0.2257	0.0288	TRUE	26	---?----+--?--?-----?---?????-?-----	27.4	34.4351	0.09893	0.0014337	-0.115094	0.0147732	6.66e-15	0.0164566	5.437e-13	913	FALSE	1
	cg26266427-chr6:31237124:SNP	cg26266427	Body	NM_019105	TNXB	Island	chr6	32063838	chr6:31237124:SNP	rs1130838	826714	-0.171157	0.0109253	2.578e-55	18412	T	C	0.3386	0.0306	TRUE	23	---?--?-+--?--?-----??--?????-?-?---	0	19.9895	0.5837	0	-0.171157	0.0109253	2.578e-55	0.0109253	2.578e-55	913	FALSE	1
	cg26266427-chr6:32272437:SNP	cg26266427	Body	NM_019105	TNXB	Island	chr6	32063838	chr6:32272437:SNP	rs9268167	208599	-0.194278	0.0124277	0	17657	A	C	0.2421	0.0233	TRUE	25	---?----?--?--?+----?-?--????-?-----	19.2	29.6965	0.195	0.0009299	-0.194355	0.0142169	1.52e-42	0.0153775	1.373e-36	913	FALSE	1
	cg26266427-chr6:32916699:SNP	cg26266427	Body	NM_019105	TNXB	Island	chr6	32063838	chr6:32916699:SNP	rs129654	852861	0.107071	0.011208	1.26e-21	24134	T	C	0.212	0.0275	TRUE	30	+++++++++++?+-++++++?+++????-+++++++	0	26.8463	0.58	0	0.107071	0.011208	1.26e-21	0.011208	1.26e-21	913	FALSE	1
	cg26266427-chr6:32415080:SNP	cg26266427	Body	NM_019105	TNXB	Island	chr6	32063838	chr6:32415080:SNP	rs3129891	351242	-0.211592	0.013191	6.651e-58	17164	A	G	0.2129	0.0171	TRUE	24	---?----?--?--?-----?-?-?????-?-----	55.1	51.2768	0.0006247	0.0052055	-0.213034	0.0206521	6.004e-25	0.0294084	6.249e-13	913	FALSE	1
	cg26266427-chr6:31923713:INDEL	cg26266427	Body	NM_019105	TNXB	Island	chr6	32063838	chr6:31923713:INDEL	chr6:31923713:INDEL	140125	0.22859	0.0190203	2.85e-33	14124	I	D	0.1085	0.0271	TRUE	17	?--??-????-??--?----??--?????--??--+	32.4	23.664	0.09711	0.0030793	0.226892	0.0249635	9.997e-20	0.028131	4.44e-16	913	FALSE	1
	cg26266427-chr6:32646927:SNP	cg26266427	Body	NM_019105	TNXB	Island	chr6	32063838	chr6:32646927:SNP	rs3129779	583089	-0.313665	0.0238023	1.176e-39	6553	G	A	0.1556	0.0169	TRUE	10	+???+???????++?+?+??????????+???+?++	34.8	13.8098	0.1293	0.0032338	-0.310518	0.031766	1.439e-22	0.0365227	8.832e-18	913	FALSE	1
	cg26266427-chr6:30365448:SNP	cg26266427	Body	NM_019105	TNXB	Island	chr6	32063838	chr6:30365448:SNP	rs3130116		-0.178024	0.0159185	4.914e-29	17087	C	T	0.1357	0.0245	FALSE	24	+++?++++?++?++?+++++?+?-?????+?-++-+	33.9	34.7948	0.05451	0.0031799	-0.168088	0.0207078	4.773e-16	0.0240818	1.441e-13	913	FALSE	1
	cg26266427-chr6:31305546:SNP	cg26266427	Body	NM_019105	TNXB	Island	chr6	32063838	chr6:31305546:SNP	rs28367824	758292	-0.142839	0.0108063	6.893e-40	17073	T	G	0.5076	0.0378	TRUE	22	---?---???-?--?-----??--????--??----	21.4	26.7332	0.1799	0.0007204	-0.144096	0.0127289	1.04e-29	0.0137565	2.951e-25	913	FALSE	1
	cg26266427-chr6:32232758:SNP	cg26266427	Body	NM_019105	TNXB	Island	chr6	32063838	chr6:32232758:SNP	rs9268073	168920	-0.171861	0.0136811	3.42e-36	14668	C	T	0.241	0.0265	TRUE	22	+++?+++???+?++?-++++?+?+????++??++++	0	19.0348	0.5829	0	-0.171861	0.0136811	3.42e-36	0.0136811	3.42e-36	913	FALSE	1
	cg26266427-chr6:31303506:SNP	cg26266427	Body	NM_019105	TNXB	Island	chr6	32063838	chr6:31303506:SNP	rs28752900	760332	0.128805	0.0123212	1.406e-25	13256	A	T	0.4772	0.0499	TRUE	17	+++?++????+?++?+++????++????+????+++	0	13.6136	0.6275	0	0.128805	0.0123212	1.406e-25	0.0123212	1.406e-25	913	FALSE	1
	cg26266427-chr6:32654325:SNP	cg26266427	Body	NM_019105	TNXB	Island	chr6	32063838	chr6:32654325:SNP	rs9275181	590487	0.125202	0.0131836	2.165e-21	15789	G	A	0.2409	0.0157	TRUE	22	---?---??-+?--?-----???-????--??--+-	42.8	36.6921	0.01826	0.0029045	0.121142	0.0182634	3.289e-11	0.023035	5.47e-08	913	FALSE	1
	cg26266427-chr6:32579444:SNP	cg26266427	Body	NM_019105	TNXB	Island	chr6	32063838	chr6:32579444:SNP	rs139940358	515606	0.184001	0.0101228	0	19747	A	T	0.4377	0.0277	TRUE	24	+++?+++???+?++++++++??++????+++?++-+	46.2	42.742	0.00743	0.0021547	0.181065	0.0146295	3.493e-35	0.0188117	1.356e-22	913	FALSE	1
	cg26266427-chr6:31079074:SNP	cg26266427	Body	NM_019105	TNXB	Island	chr6	32063838	chr6:31079074:SNP	rs2233987	984764	-0.149807	0.0094382	9.847e-57	24630	T	C	0.3436	0.0247	TRUE	31	-----------?---+----?----???------+-	40	50.0251	0.01233	0.0018742	-0.149603	0.0128442	2.362e-31	0.0157382	1.755e-21	913	FALSE	1
	cg26266427-chr6:31592524:SNP	cg26266427	Body	NM_019105	TNXB	Island	chr6	32063838	chr6:31592524:SNP	rs3130622	471314	-0.270866	0.0122198	7.29e-109	21419	C	G	0.1956	0.0201	TRUE	28	-----------?--?-----?---????--?-----	32.8	40.1835	0.04925	0.0020872	-0.273893	0.0157624	1.248e-67	0.0181865	3.614e-50	913	FALSE	1
	cg26266427-chr6:32275375:INDEL	cg26266427	Body	NM_019105	TNXB	Island	chr6	32063838	chr6:32275375:INDEL	chr6:32275375:INDEL	211537	-0.186138	0.0137715	0	14673	I	D	0.2361	0.0253	TRUE	22	+++?+++???+?++?-++++?+?+????++??++++	0	17.9054	0.655	0	-0.186138	0.0137715	1.256e-41	0.0137715	1.256e-41	913	FALSE	1
	cg26266427-chr6:32433400:SNP	cg26266427	Body	NM_019105	TNXB	Island	chr6	32063838	chr6:32433400:SNP	rs9268938	369562	-0.17873	0.0163929	1.117e-27	9507	A	G	0.2712	0.0337	TRUE	15	?--??--???-??-??----???-?????-???---	30.5	20.1308	0.1261	0.0018051	-0.180058	0.0204171	1.155e-18	0.0235716	3.391e-14	913	FALSE	1
	cg26266427-chr6:32418710:SNP	cg26266427	Body	NM_019105	TNXB	Island	chr6	32063838	chr6:32418710:SNP	rs9268766	354872	-0.158232	0.0115366	0	16563	C	A	0.3438	0.03	TRUE	24	+++?++++?++?++?++?++?+?+????++?+++++	25.2	30.7371	0.1294	0.0010906	-0.159034	0.0137872	8.792e-31	0.0154174	1.032e-24	913	FALSE	1
	cg26266427-chr6:31434520:SNP	cg26266427	Body	NM_019105	TNXB	Island	chr6	32063838	chr6:31434520:SNP	rs3094012	629318	-0.32818	0.0144343	1.96e-114	20398	C	G	0.138	0.0228	TRUE	26	---?----?--?--?-----?---????--?-----	33.6	37.6295	0.05026	0.0028061	-0.330659	0.0188548	7.46e-69	0.0217261	1.494e-51	913	FALSE	1
	cg26266427-chr6:31238762:SNP	cg26266427	Body	NM_019105	TNXB	Island	chr6	32063838	chr6:31238762:SNP	rs9264652	825076	-0.177276	0.0107696	7.016e-61	18985	T	C	0.3367	0.0308	TRUE	24	---?----+--?--?-----??--????--???---	20	28.7537	0.1886	0.0007143	-0.177619	0.0125719	2.543e-45	0.0134637	1.36e-39	913	FALSE	1
	cg26266427-chr6:31942514:SNP	cg26266427	Body	NM_019105	TNXB	Island	chr6	32063838	chr6:31942514:SNP	rs377370	121324	0.439836	0.0132323	2.88e-242	24630	G	A	0.1325	0.0223	TRUE	31	-----------?--------?----???--------	45.7	55.2426	0.003332	0.0046355	0.433889	0.0189188	2.11e-116	0.0243662	7.738e-73	913	FALSE	1
	cg26266427-chr6:32601647:SNP	cg26266427	Body	NM_019105	TNXB	Island	chr6	32063838	chr6:32601647:SNP	rs2002778	537809	0.255624	0.0218948	1.709e-31	8331	C	T	0.1529	0.0357	TRUE	12	-???-?-?????--?-?-?-????????-???-?--	53.7	23.7378	0.01389	0.0069693	0.253319	0.034744	3.076e-13	0.0472486	6.296e-08	913	FALSE	1
	cg26266427-chr6:32281958:SNP	cg26266427	Body	NM_019105	TNXB	Island	chr6	32063838	chr6:32281958:SNP	rs2069026	218120	-0.203314	0.0125584	5.992e-59	17658	T	C	0.2357	0.0234	TRUE	25	---?----?--?--?+----?-?--????-?-----	9.1	26.397	0.3333	0.0003996	-0.203422	0.0133695	2.797e-52	0.0138127	4.846e-49	913	FALSE	1
	cg26266427-chr6:29549653:SNP	cg26266427	Body	NM_019105	TNXB	Island	chr6	32063838	chr6:29549653:SNP	rs1233393		-0.190509	0.017142	1.078e-28	16182	G	C	0.1212	0.0206	FALSE	23	+++??+?+?++?++?+++++?-?-????++?+++-+	34.5	33.5743	0.05424	0.0036313	-0.18076	0.0224141	7.349e-16	0.0261606	3.282e-13	913	FALSE	1
	cg26266427-chr6:32680441:SNP	cg26266427	Body	NM_019105	TNXB	Island	chr6	32063838	chr6:32680441:SNP	rs9275589	616603	-0.149951	0.0105987	1.92e-45	17652	T	G	0.5238	0.0333	TRUE	25	---?----?--?-+?-----?-?-????--?-----	57.9	57.0368	0.0001653	0.003916	-0.150369	0.0170834	1.343e-18	0.0251881	2.629e-09	913	FALSE	1
	cg26266427-chr6:32396313:SNP	cg26266427	Body	NM_019105	TNXB	Island	chr6	32063838	chr6:32396313:SNP	rs3135343	332475	-0.153475	0.0116128	0	17657	T	C	0.3113	0.0345	TRUE	25	---?----?--?--?-----?-?--????-?-----	41.7	41.1566	0.01601	0.0024461	-0.153524	0.0159237	5.354e-22	0.0199143	1.291e-14	913	FALSE	1
[truncated: 96,525 more rows]

## Sheet: S6
	Supplementary Table 6 A total of 237 blood mQTLs overlapped with the genetic variants reaching P<10-5 in Bellenguez et al. (2022). The mQTLs in blood were obtained from the GoDMC database. Annotations for CpGs include location of the CpG based on hg38/GRCh38 genomic annotation (Chr, Position), and Illumina gene annotation (UCSC_RefGene_Name), the type of associated genomic feature (UCSC_RefGene_G…
[truncated: 2,958 more rows]

[truncated: 2 more sheets: S7, S8]
